# Supplementary material for: Asthma and atopic dermatitis are associated with increased risk of clinical Plasmodium falciparum malaria
Source: PubMed Central journal article supplement — BMJ Open. 2013 Jul 23;3(7):e002835. doi: 10.1136/bmjopen-2013-002835 (PMC3731724; doi:10.1136/bmjopen-2013-002835), 2013-07-23
Supplement: bmjopen-2013-002835.draft_revisions.pdf [file bmjopen-2013-002835.draft_revisions.pdf]

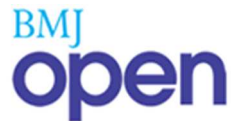

**Asthma and atopic dermatitis are associated with increased risk of clinical Plasmodium falciparum malaria**

|                                 |                                                                                                                                                                                                                                                                                                                                                                                                                                                                                                                                                       |
|---------------------------------|-------------------------------------------------------------------------------------------------------------------------------------------------------------------------------------------------------------------------------------------------------------------------------------------------------------------------------------------------------------------------------------------------------------------------------------------------------------------------------------------------------------------------------------------------------|
| Journal:                        | <i>BMJ Open</i>                                                                                                                                                                                                                                                                                                                                                                                                                                                                                                                                       |
| Manuscript ID:                  | bmjopen-2013-002835.R2                                                                                                                                                                                                                                                                                                                                                                                                                                                                                                                                |
| Article Type:                   | Research                                                                                                                                                                                                                                                                                                                                                                                                                                                                                                                                              |
| Date Submitted by the Author:   | 13-Jun-2013                                                                                                                                                                                                                                                                                                                                                                                                                                                                                                                                           |
| Complete List of Authors:       | Herrant, Magali; Institut Pasteur, Loucoubar, Cheikh; Institut Pasteur, Bassene, Hubert; Institut de Recherche pour le Développement, Goncalves, Bronner; Institut Pasteur, Boufkhed, Sabah; Institut Pasteur, Diene Sarr, Fatoumata; Institut Pasteur de Dakar, Fontanet, Arnaud; Institut Pasteur, Tall, Adama; Institut Pasteur de Dakar, Baril, Laurence; Institut Pasteur de Dakar, Mercereau-Puijalon, Odile; Institut Pasteur, Mecheri, Salaheddine; Institut Pasteur, Sakuntabhai, Anavaj; Institut Pasteur, Paul, Richard; Institut Pasteur, |
| <b>Primary Subject Heading</b>: | Epidemiology                                                                                                                                                                                                                                                                                                                                                                                                                                                                                                                                          |
| Secondary Subject Heading:      | Epidemiology, Immunology (including allergy), Infectious diseases, Dermatology                                                                                                                                                                                                                                                                                                                                                                                                                                                                        |
| Keywords:                       | Allergy < THORACIC MEDICINE, Asthma < THORACIC MEDICINE, Epidemiology < INFECTIOUS DISEASES                                                                                                                                                                                                                                                                                                                                                                                                                                                           |
|                                 |                                                                                                                                                                                                                                                                                                                                                                                                                                                                                                                                                       |

SCHOLARONE™  
Manuscripts

**Asthma and atopic dermatitis are associated with increased risk of clinical *Plasmodium falciparum* malaria**

Magali Herrant<sup>1,2</sup> *scientist*, Cheikh Loucoubar<sup>1,2,3,4</sup> *scientist*, Hubert Bassène<sup>5</sup> *scientist*, Bronner Gonçalves<sup>2</sup> MD, Sabah Boufkhed<sup>2</sup> *scientist*, Fatoumata Diene Sarr<sup>2</sup> MD, Arnaud Fontanet<sup>6,7</sup> MD, Adama Tall<sup>2</sup> *scientist*, Laurence Baril<sup>2</sup> MD, Odile Mercereau-Puijalon<sup>8</sup> *scientist*, Salaheddine Mécheri<sup>9</sup> *scientist*, Anavaj Sakuntabhai<sup>1,10</sup> *scientist*, Richard Paul<sup>1</sup> *scientist*

- <sup>1</sup> Institut Pasteur, Unité de la Génétique Fonctionnelle des Maladies Infectieuses, CNRS URA3012, 28 rue du Docteur Roux, F-75724, Paris cedex 15, France.
- <sup>2</sup> Institut Pasteur de Dakar, Unité d'Epidémiologie des Maladies Infectieuses, Dakar, Senegal.
- <sup>3</sup> INSERM, U946, Genetic Variation and Human Diseases Unit, F-75010, Paris, France.
- <sup>4</sup> Université Paris Diderot, Sorbonne Paris Cité, Institut Universitaire d'Hématologie, F-75010, Paris, France.
- <sup>5</sup> Institut de Recherche pour le Développement (IRD), Unité de Recherche sur les Maladies Infectieuses et Tropicales Emergentes, URMITE CNRS-IRD 198 UMR 6236, Dakar, Sénégal
- <sup>6</sup> Institut Pasteur, Unité d'Epidémiologie des Maladies Emergentes, 25 rue du Docteur Roux, F-75724, Paris cedex 15, France.
- <sup>7</sup> Conservatoire National des Arts et Métiers, 292 rue Saint Martin, Paris 75003, France
- <sup>8</sup> Institut Pasteur, Unité d'Immunologie Moléculaire des Parasites, CNRS URA2581, Paris, France.
- <sup>9</sup> Institut Pasteur, Unité de Biologie des Interactions Hôte Parasite, 25 rue du Docteur Roux, F-75724, Paris cedex 15, France.
- <sup>10</sup> Complex Systems group, Faculty of Science, Mahidol University, Bangkok, Thailand.

**Correspondance to:** Richard Paul, Institut Pasteur, Unité de la Génétique Fonctionnelle des Maladies Infectieuses, 28 rue du Docteur Roux, 75724 Paris cedex 15, France.  
richard.paul@pasteur.fr

## Article summary

### Article focus

- Genetic studies suggest a link between susceptibility to allergy and malaria in Africa
- We hypothesize that atopy increases susceptibility to malaria

### Key messages

- Results demonstrate an association between asthma, atopic dermatitis and susceptibility to clinical *P. falciparum* episodes.
- Genetic pre-disposition to asthma or atopic dermatitis impairs the acquisition of clinical immunity to malaria.
- Administration of anti-histamines to atopic children will likely reduce the burden of clinical malaria in these children, increase the efficacy of first-line treatment anti-malarials and alleviate the non-infectious consequences of atopy.

### Strengths and limitations

The major strength of this study is the complete knowledge of the number of clinical *P. falciparum* malaria episodes each individual has had since birth and the exposure level per trimester over the 15 years covering the birth cohort. No other study has such detailed information for such a length of time. The major weakness of the study is the relatively small sample size, which would have reduced power to detect an association.

Abstract

**Objectives:** To assess the impact of atopy and allergy on the risk of clinical malaria.

**Design:** A clinical and immunological allergy cross-sectional survey in a birth cohort of 175 children from 1 month to 14 years of age followed for up to 15 years in a longitudinal open cohort study of malaria in Senegal. Malaria incidence data were available for 143 of these children (aged 4 months to 14 years of age) for up to 15 years. Mixed model regression analysis was used to determine the impact of allergy status on malaria incidence, adjusting for age, gender, sickle cell trait and force of infection.

**Main outcome measures:** Asthma, allergic rhinoconjunctivitis and atopic dermatitis status, the number of clinical *Plasmodium falciparum* malaria episodes since birth and associated parasite density.

**Results:** Twelve percent of the children were classified as asthmatic and ten percent as having atopic dermatitis. These groups had respectively a two-fold (OR 2.12 95% confidence intervals 1.46 to 3.08;  $P= 8 \times 10^{-5}$ ) and three-fold (OR 3.15, 1.56 to 6.33;  $P= 1.3 \times 10^{-3}$ ) increase in the risk of clinical *P. falciparum* malaria once older than the age of peak incidence of clinical malaria (3 to 4 years of age). They also presented with higher *P. falciparum* parasite densities (Asthma: mean 105.3 parasites/ $\mu$ L  $\pm$ SE 41.0 vs. 51.3  $\pm$ 9.7;  $P= 6.2 \times 10^{-3}$ ; Atopic dermatitis: 135.4  $\pm$ 70.7 vs. 52.3  $\pm$ 11.0;  $P=0.014$ ). There was no effect of allergy on the number of non-malaria clinical presentations. Individuals with allergic rhinoconjunctivitis did not have an increased risk of clinical malaria nor any difference in parasite densities.

**Conclusion:** These results demonstrate that asthma and atopic dermatitis delay the development of clinical immunity to *P. falciparum*. Despite the encouraging decrease in malaria incidence rates in Africa, a significant concern is the extent to which the increase in allergy will exacerbate the burden of malaria. Given the demonstrated anti-parasitic effect of anti-histamines, administration to atopic children will likely reduce the burden of clinical malaria in these children, increase the efficacy of first-line treatment anti-malarials and alleviate the non-infectious consequences of atopy.

## Introduction

The World Allergy Organization estimates that 40% of the world's population is concerned by allergic diseases.<sup>1</sup> In developing countries where *Plasmodium falciparum* malaria is endemic, prevalence of allergy is significantly lower, but is on the increase.<sup>2</sup> T helper type 2 (Th2) cells, their related cytokines, IgE, eosinophils and mast cells play a major role in allergic inflammation. Orientation of the immune response towards a Th1 profile is crucial for immunity to intracellular pathogens,<sup>3</sup> whereas orientation towards a Th2 profile drives immunity to extracellular pathogens and antigens resulting in class switching giving rise to IgE-producing B cells.<sup>4</sup> A role of the Th1/Th2 balance in the development of clinical malaria following infection by *P. falciparum* has been suggested by numerous studies.<sup>5-7</sup> Whilst it is recognised that acquired anti-parasite immunity is IgG dependent,<sup>8</sup> parasite-specific IgE also impact upon the clinical outcome of infection. For example, higher IgE but not IgG levels have been observed in patients with cerebral malaria than those with uncomplicated *P. falciparum* infection.<sup>9</sup> The role of IgE, however, remains unclear.<sup>10</sup>

The interplay between infectious agents and allergy is ambiguous. On the one hand, for example, severe respiratory syncytial virus infection in infants increased the risk of allergic rhinoconjunctivitis and allergic asthma.<sup>11,12</sup> On the other hand, measles,<sup>13</sup> hepatitis A<sup>14</sup> and tuberculosis<sup>15</sup> seemingly reduce atopy. Although, an atopic condition can increase incidence of disease, such as the case for the skin commensal *Staphylococcus aureus* in patients with atopic dermatitis,<sup>16</sup> an atopic tendency *per se* does not generally lead to increased illness from infectious agents.

Genome wide studies have identified chromosomal regions linked to clinical malaria, all of which overlap with those previously identified to be involved in atopic dermatitis, asthma, atopy and IgE levels,<sup>17-19</sup> suggesting that common mechanisms may be involved in both pathologies.<sup>20</sup> Chromosomal region 5q31 that has been repeatedly shown to be associated with control of parasite density and contains a cluster of cytokines, among which IL12B has been previously associated with psoriasis.<sup>21</sup> The other regions, 13q13-q22, 5p15-p13 and 12q21-q23, contain genes involved in innate immunity, notably the interleukin 7 receptor, and several involved in tumour necrosis factor synthesis [C1q and tumour necrosis factor related protein 3 (C1QTNF3)] and a gene involved in the complement system (C9).<sup>20</sup>

Several additional lines of evidence support the concept that susceptibility to malaria and atopy may be related to similar immunological defects. In Ethiopia, a history of malaria was associated with atopy.<sup>22</sup> A mouse model for human atopic disease was found to be very susceptible to murine malaria and a major locus for atopic disease mapped close to the region controlling parasite density.<sup>23</sup> This region contains several candidate genes that have effects on T-cell function.<sup>23</sup>

Moreover, a direct effect of histamine in the malaria pathogenesis has been found using genetic and pharmacological approaches<sup>24</sup> and increased levels of histamine are associated with the severity of disease in humans infected with *P. falciparum* and in animal malaria models.<sup>25,26</sup>

To test the hypothesis that allergy impacts upon clinical *P. falciparum* malaria, we performed a clinical allergy cross-sectional study in the family-based longitudinal cohort from Senegal previously used for the genome linkage study<sup>20</sup> and analysed the impact of asthma, atopic dermatitis, allergic rhinoconjunctivitis on the incidence of clinical *P. falciparum* episodes and the maximum parasite density during each episode.

**Methods**

**Population and outcome data**

The malaria research program conducted in Dielmo village in Senegal has been ongoing since 1990 as described elsewhere.<sup>27</sup> In brief, between 1990 and 2008, a longitudinal study involving the inhabitants of the village of Dielmo, Senegal, was carried out to identify all episodes of fever. The study design included daily medical surveillance with systematic blood testing of individuals with fever and examination of 200 oil-immersion fields on a thick blood film for malaria parasites (about 0.5 µL of blood). Each individual was given a unique identification code and details of family ties, occupation, and precise place of residence were recorded on detailed maps of each household with the location of each bedroom. All households were visited daily, absenteeism recorded, and the presence of fever or other symptoms assessed. We systematically recorded body temperature at home three times a week (every second day) in children younger than 5 years, and in older children and adults in cases of suspected fever or fever-related symptoms. In cases of fever or other symptoms,

blood testing was done at the dispensary by finger prick, and we provided detailed medical examination and specific treatment. Parasitologically confirmed clinical malaria episodes were treated according to national guidelines. From 1990 to 2008, four different drug regimens were implemented: Quinine from 1990 to 1994, Chloroquine from 1995 to 2003, Fansidar (sulfadoxine-pyrimethamine) from 2004 to mid-2006 and Artemisinin-based combination therapy (ACT; Amodiaquine- sulfadoxine-pyrimethamine) from mid-2006 to 2008.

Parasite positivity was established as follows. Thick blood films were prepared and stained by 3% Giemsa stain. Blood films were examined under an oil immersion objective at x1000 magnification by the trained laboratory technicians and 200 thick film fields were examined to count the number of asexual and gametocyte parasite stages. Asexual parasite densities (per  $\mu\text{L}$ ) were calculated by establishing the ratio of parasites to white blood cells and then multiplying the parasite count by 8,000, the average white blood cell count per  $\mu\text{L}$  of blood.

Malaria transmission in Dielmo is intense and perennial. We conducted a cross-sectional survey to estimate the prevalence of symptoms related to allergic diseases among 175 children aged from 1 month to 14 years old who were born during the malaria research program.

Both the longitudinal and cross-sectional surveys were approved by the Ministry of Health of Senegal. Informed consent of the volunteers is renewed every year. More specifically for the cross-sectional survey, after informing about the procedures and the purpose of the study, written informed consent was obtained from parents or guardians of children either by signature or by thumbprint on a voluntary consent form written in both French and Wolof, the main local language. Consent was obtained in the presence of the school director, an independent witness.

The family structure (pedigree) was available after a demographic census performed for every volunteer at his adhesion in the project. A verbal interview of mothers or key representatives of the household was used to obtain information on genetic relationships between studied individuals, their children, their parents, and to identify genetic links among the population. The total pedigree comprised 828 individuals, including absent or dead relatives, composed of ten independent families that can be sub-divided into 206 nuclear families (father – mother couples with at least one child) with an average of 3.6

children each. Genetically related nuclear families occur because of multiple marriages and marriages among related individuals. Previous typing with microsatellites has enabled the construction of a pedigree based on Identity-by-Descent using MERLIN.<sup>20,28</sup> The mean coefficient of inbreeding is 0.0008. Newborns since this original genetic analysis were added to the family of the parents in question. The 143 children, with both allergy and malaria data, belonged to 61 nuclear families and comprised 30 singletons, 102 siblings and 11 half-sibs (yielding 55 half-sib pairs). The mean genetic relatedness (by pedigree) of the 143 children is 0.0114 (range: 0.0013 to 0.022).

*P. falciparum clinical episodes*

*P. falciparum* malaria clinical episode phenotypes analysed were: (i) clinical *P. falciparum* infections treated with anti-malarial therapy and (ii) the highest parasite density during the *P. falciparum* clinical episode. A clinical *P. falciparum* episode was defined as a clinical presentation with fever (axillary temperature  $\geq 37.5^{\circ}\text{C}$ ) and/or other clinical signs suggestive of malaria associated with a thick blood smear positive for *P. falciparum* and that was treated with anti-malarial therapy. Repeated clinical malaria presentations within 15 consecutive days were not considered to be independent and were excluded from the analyses, unless there was a negative thick blood smear between two clinical presentations. We also excluded observations in any trimester for which the individual was not present for at least one third of the time.

We calculated the quarterly incidence rate of clinical *P. falciparum* episodes in children below the age of 15 years as the ratio of the total number of clinical *P. falciparum* episodes during the trimester divided by the total number of person-trimesters surveyed. Incidence rate is expressed as cases per 100 person-trimesters (see Supplementary Figure S1). This rate was used in the analysis to approximate the force of infection (exposure level) within the targeted population at the time of a given clinical *P. falciparum* episode.

The total number of clinical presentations per trimester that were not attributable to *P. falciparum* was tabulated. Repeated non-malaria presentations within seven consecutive days were not considered to be independent and were excluded.

*Allergic diseases and atopic status*

The International Study of Asthma and Allergies in Childhood (ISAAC) diagnostic criteria have been shown to be reproducible, adequate and able to discriminate children with allergic diseases in different areas of the world.<sup>2</sup> The standardized ISAAC questionnaire originally written in English was translated into French in compliance with ISAAC guidelines<sup>29</sup>, adapting it to the usual local customs following advice from local clinicians and paediatric allergologists (Acknowledgements and Technical Appendix). The adequacy and reliability of the translated questionnaire had been previously confirmed by a pilot study on 30 randomly selected children in the same community. The questionnaire was completed by specially trained health workers during an oral interview conducted in Wolof with children and their mothers or guardians.

To assess the prevalence of allergic diseases in children, we used the positive and negative predictive values of the ISAAC questionnaire diagnosis criteria developed for subtropical countries.<sup>30</sup> Each question was scored according to the medical diagnosis of paediatricians and paediatric allergologists. Positive or negative answers were thus graded on the basis of symptom sensitivity, specificity, frequency, location or early onset. For each allergic disease, three categories of symptom severity, *severe*, *moderate*, and *none*, were defined as follows:

*Asthma – severe* symptoms if the child had “wheezing or whistling in the chest before the age of two years” and “more than three times” or severe enough to “limit his/her speech”; *moderate* symptoms if the child had “wheezing or whistling in the chest before the age of two years” and “in the past 12 months”; and *none* otherwise.

*Allergic rhinoconjunctivitis – severe* symptoms if the child had “sneezing, runny or stuffy nose in the past 12 months” and “more than five times a year”, and “itchy, watery eyes or tropical endemic limboconjunctivitis (TELC) in the past 12 months”; *moderate* symptoms if the child had “sneezing, runny or stuffy nose in the past 12 months”, and “itchy, watery eyes or TELC in the past 12 months”; and *none* otherwise.

*Atopic dermatitis – severe* symptoms if the child had “scaly or exudating, crusted and pruritic patches in the past 12 months” and “affecting any of the following characteristic areas: face, around the ears or eyes, folds of armpits or elbows or groin, behind the knees, under the buttocks”, and “onset of symptoms before the age of two years”; *moderate* symptoms if the child had “scaly or exudating, crusted and pruritic patches in the past 12 months” and

“affecting any of characteristic areas (see above)”, and “onset of symptoms before the age of four years”; and *none* otherwise.

The inter-relationships between variables reflecting the severity of symptoms of the three allergic diseases were used to identify children at high risk of atopy. The *high probability* group was defined by the prevalence of at least one of any *severe* symptoms or two of any *moderate* symptoms. The *probable* group was defined as those with *moderate* symptoms from one of the three allergic diseases and remaining children were classified in the *unlikely* group.

*Helminths*

Helminthic infections are common in this region and are known to modify the clinical course and outcome of both allergic diseases and malaria.<sup>31,32</sup> We therefore carried out a helminth survey for 91 individuals present during the cross-sectional survey. Diagnosis was performed by stool examination by microscope and by the Kato technique to search for the presence of *Ascaris lumbricoides*, hookworms (*Ancylostoma duodenale* and *Necator americanus*), whipworm (*Trichuris trichiuria*), *Schistosoma mansoni*, and *Strongyloides stercoralis*. Examination for pinworms (*Enterobius vermicularis*) was performed by the anal scotch-test. An anti-helminthic treatment was proposed for all infested individuals.

*Immunoglobulin E titres*

Specific IgE titres were measured by ELISA as previously described.<sup>33</sup> A panel of allergens of potential pertinence to the three classes of allergy was used: (i) Salivary gland extracts (SGE) of two mosquito species present in the study cohorts, *Aedes aegypti* and *Anopheles gambiae sensu stricto*, and (ii) *P. falciparum* parasite extract were prepared as previously described<sup>31</sup>; (iii) House dust mite spp. *Dermatophagoides farinae* and *Dermatophagoides pteronyssinus*; (iv) a mix of pollen allergens from five ubiquitous gramineae spp. [Cock’s-foot (*Dactylis glomerata*), Timothy grass (*Phleum pratense*), Sweet Vernal grass (*Anthoxanthum odoratum*), Perennial ryegrass (*Lolium perenne*), Kentucky Bluegrass (*Poa pratensis*)] (all from Stallergenes, France).

**Statistical analysis**

Statistical analyses were performed using R version 2.12.0 (The R Foundation for Statistical Computing, Vienna, Austria). To address the effect of allergic status on the risk of clinical *P.*

*falciparum* episodes, we performed Generalized Linear Mixed Models (GLMM) extended to pedigree data using the *pedigreemm* package for R to account for the non-independence of individuals because of family relationships, shared house and for repeated measures from the same individual (Technical Appendix). Correlated individual effects due to familial relationships were taken into account by using the pedigree-based genetic relatedness matrix that contains the genetic covariance among all pairs of individuals in the study cohort and is calculated using the pedigree information.<sup>34</sup> Shared house and repeated measures from the same individual were modelled as random effects. All random effects were assumed to be normally distributed, and conditional on these random effects, the dependent variable had: (i) a Binomial distribution when the studied phenotype was the occurrence of a clinical *P. falciparum* episode treated with anti-malarial therapy during a trimester, (ii) a Gaussian distribution when the studied phenotype was the logarithm of the maximum parasite density during a given clinical *P. falciparum* episode, and (iii) a Poisson distribution when the studied phenotype was the number of non-malaria episodes per trimester. The effects of allergy disease classes on these dependent variables were modelled as fixed effects. Allergy classes were reduced to two levels, *Severe* or *moderate* vs. *none* for analyses of asthma, atopic dermatitis and allergic rhinoconjunctivitis and *high probability* vs. *probable* and *unlikely* for atopic tendency. Co-variables included sickle cell trait<sup>33</sup>, gender, number of days present on site during the trimester, trimestrial incidence of *P. falciparum* and age. Age was initially analysed as a continuous covariate. To assess the age-specific effect of allergy, age was categorised into two levels (<3.5 years of age and ≥3.5 years of age, based on the age of peak clinical incidence) and allergy class was nested within age class. The age threshold was varied from 1.5 years to 5.5 years of age and the data re-analysed to assess at which age there was the strongest effect. The association of allergy classes with IgE levels was analysed by box-cox transforming the data and fitting a GLMM with a normal distribution.

## Results

Of the 205 eligible children aged under 15 years involved in the family-based longitudinal study, 175 (85.4 %) participated in the cross-sectional survey to assess the prevalence of related symptoms of allergic diseases. All eligible children present at the time of the survey

were included; no explicit refusal to participate was recorded. The study cohort was aged from 1 month to 14 years 11 months. The sex-ratio (male/female) was 0.94.

From 1994 until 2008, 143 of the children participating in the cross-sectional survey were present for at least 31 days in any trimester during the study period generating a total of 3,093 person-trimesters of presence (Supplementary Table S1). There were 2,065 treated *P. falciparum* clinical episodes (per individual: median 11, range 0-47)(Supplementary Table S2). The age peak of incidence of *P. falciparum* episodes occurred at 3 to 4 years of age (Figure 1). There were 1,868 non-malaria episodes (median 12, range 0-37) (Table S2). These non-malaria clinical presentations were associated with headache (38 %), chills (32 %), cough (13 %), vomiting (11 %) and diarrhoea (6 %).

The prevalence of moderate or severe asthma symptoms was respectively 2.3 % and 10.3 % (Table 1). The prevalence of moderate or severe allergic rhinoconjunctivitis symptoms was respectively 6.3 % and 10.3 %. The prevalence of moderate or severe atopic dermatitis symptoms was respectively 6.3 % and 2.9 %. On the basis of symptom severity, an atopic tendency was estimated to be unlikely for 68.0 %, probable for 9.1 % and highly probable for 22.9 % of the 175 children. The frequency of each allergy class in children for whom malaria data were available is shown in Table S1.

The risk of treated clinical *P. falciparum* infections was higher for children with high probability of atopy (OR 1.65, 95% confidence intervals 1.20 to 2.26;  $P=0.002$ ) (Table 2), after adjusting for age, sickle cell trait and the exposure level. Gender was not found to be significant. Analysing the impact of atopy in children younger and older than the peak age of clinical incidence (3 to 4 years old), revealed that atopy increased the risk of *P. falciparum* episodes in children at an age greater than 3.5 years (OR 2.02, 1.39 to 2.93;  $P=2\times 10^{-4}$ ), but not in children of age prior to the peak clinical incidence (OR 1.38, 0.92 to 2.08;  $P=0.124$ ) (Table 2). This increased risk resulted in an ever increasing cumulative number of *P. falciparum* episodes with age beyond that of peak clinical incidence (Figure 2. See supplementary Figure S2 for model predictions for comparison).

Analysis by allergy category revealed that asthma (severe or moderate) increases the risk of *P. falciparum* episodes (OR 2.12, 1.46 to 3.08;  $P= 8 \times 10^{-5}$ ) and this again only in children of age greater than 3.5 years old (OR 2.33, 1.50 to 3.61;  $P= 1.5 \times 10^{-4}$ ). Atopic dermatitis increased the risk of clinical malaria in children older (OR 3.15, 1.56 to 6.33;  $P= 1.3 \times 10^{-3}$ ) but

not younger than 3.5 years of age (Table 2). Allergic rhinoconjunctivitis was not associated with increased risk of clinical malaria at any age (Table 2). The impact of atopy, asthma and atopic dermatitis can be clearly seen in the ever-increasing number of cumulative *P. falciparum* episodes beyond the age of the onset of clinical immunity in the population, 3.5 years of age (Figure 2). There is no difference in the number of clinical malaria episodes prior to this age in individuals with or without an allergic condition. Analysis using different age thresholds (from 1.5 to 5.5 years of age) revealed similar OR for thresholds of 2.5, 3.5 and 4.5 years of age. The maximum OR for increased malaria occurred in children older than 4.5 years of age and with atopy or atopic dermatitis, whereas for the asthma group it occurred in children after 3.5 years of age (Supplementary Table S3).

There was no impact of any allergic disease on the number of non-malaria episodes by trimester (Supplementary Table S4).

The impact of atopy, asthma and atopic dermatitis on the maximum *P. falciparum* parasite density during a given clinical malaria episode mirrored that of the risk of *P. falciparum* episodes. Parasite density was significantly higher for children with allergic disease older than 3.5 years of age (Table 3 and supplementary Figure S3 for residuals of the fitted model). As the log-transformed data were left skewed, we additionally analysed using box-cox transformation and probit normalization of the data. The results were qualitatively the same (Supplementary text and Figures S4-S8). Allergic rhinoconjunctivitis had no impact on the parasite density (Table 3). Analysis using different age thresholds yielded similar qualitative conclusions as seen with the number of clinical episodes (Table S3).

Individuals with moderate or severe symptoms of atopic dermatitis had significantly higher specific IgE titres against *Ae. aegypti* ( $P=0.004$ ) and *An. gambiae* SGE ( $P<0.001$ ). There were no detectable specific anti-*P. falciparum* IgE. Individuals with moderate or severe symptoms of allergic rhinoconjunctivitis did not have significantly higher IgE titres against the tested gramineae ( $P=0.28$ ), although titres decreased with age ( $P=0.035$ ). There was also no effect of asthma on IgE titres against the house dust mite spp. tested (*D. farinae*  $P=0.60$  & *D. pteronyssinus*  $P=0.27$ ).

Only five individuals were infested with helminths (two *Ancylostoma*, one *Strongyloides*, one *Trichuris* and one *Enterobius*).

**Discussion**

**Principal findings**

Establishing the allergic status of children up to the age of 15 years old followed for malaria since birth, revealed an association of asthma and atopic dermatitis with susceptibility to clinical *P. falciparum* episodes. Importantly the increase in risk of malaria associated with these allergic conditions occurred after the peak clinical incidence of disease in the population, suggesting that they delay the development of clinical immunity to malaria.

**Strengths and weaknesses of the study**

The major strength of this study is the complete knowledge of the number of clinical *P. falciparum* malaria episodes each individual has had since birth and the exposure level per trimester over the 15 years covering the birth cohort. No other study has such detailed information for such a length of time. The major weakness of the study is the relatively small sample size, which would have reduced power to detect an association. In addition, although allergy diagnosis for children under 2 years of age is not considered reliable, there were only 15 individuals under 2 at the time of the allergy study of the 143 for whom malaria and allergy data were available.

**Meaning of the study**

Under intense malaria transmission, after repeated exposure to the parasite, children develop a clinical immunity<sup>35</sup>, whereby they tolerate elevated parasite densities without showing clinical symptoms. In this cohort, the population mean onset of clinical immunity occurred at 3 to 4 years of age. Although clinical immunity is accompanied by a reduction in parasite density, effective anti-parasite immunity develops much more slowly<sup>36</sup> with individuals achieving a state of premunition, whereby they maintain low-grade parasite densities in an asymptomatic state.<sup>37</sup> We show here that children with clinically defined asthma or atopic dermatitis have an increased risk of presenting with *P. falciparum* malaria episodes requiring treatment once passing the age of peak clinical incidence. They also had higher parasite density during clinical episodes, suggesting a reduced ability to control parasite replication. The observed increase in clinical incidence of malaria in patients with asthma or atopic dermatitis is not likely to be the result of increased frailty of such individuals; these individuals did not come more frequently to the clinic with non-malaria

1  
2  
3 symptoms. Our previous genome linkage study identifying chromosomal regions<sup>20</sup>  
4 associated with malaria that overlap with those previously shown to be linked to  
5 asthma/atopy suggests that there may be a shared genetic basis to these pathologies rather  
6 than any causative effect of one on the other. This is consistent with the increased  
7 susceptibility to malaria of mouse atopic models.<sup>23</sup>  
8  
9

### 10 11 12 **Comparison with other studies**

13  
14 A previous study in Ethiopia (East Africa) found that a history of malaria (yes/no) increased  
15 risk of atopic dermatitis in 306 cases compared to 426 controls as characterized using the  
16 ISAAC questionnaire.<sup>22</sup> The only other epidemiological study that has previously examined  
17 the link between malaria and atopy<sup>38</sup> also interpreted the result from the perspective of the  
18 impact of malaria on atopy. They examined the re-infection rate with *P. falciparum* over a 5-  
19 year period in 91 children that were subsequently classified as atopic or not using skin prick  
20 tests (SPT) with house dust mite antigen. Their conclusion was that, as with measles<sup>13</sup> and  
21 tuberculosis<sup>15</sup>, malaria infection reduces atopy. However, the study lacked previous infection  
22 data since birth of the participating individuals and focussed on atopy as determined by SPT  
23 against a single allergen. The case-control study of atopic dermatitis risk factors cited above  
24 found no overall association between allergen skin sensitization and atopic dermatitis. We  
25 also found no evidence of increased IgE titres against house dust mites in the asthmatic or  
26 atopic dermatitis groups or against grass pollen in individuals with allergic  
27 rhinoconjunctivitis. Such differences likely reflect the different IgE reactivity profiles due to  
28 differences in allergen exposure in Africa.<sup>39</sup> There was no evidence of anti-parasite IgE in this  
29 cohort of children. We previously showed that circulating anti-parasite IgE titres were  
30 strongly positively correlated with anti-mosquito saliva IgE, but became undetectable  
31 following malaria exposure, potentially being bound to effector cells.<sup>33</sup> Only mosquito saliva,  
32 a known major local allergen, induced a specific IgE response at significantly higher titres in  
33 individuals with atopic dermatitis.  
34  
35  
36  
37  
38  
39  
40  
41  
42  
43  
44  
45  
46  
47  
48  
49

50 Although the immune effectors of clinical immunity are still poorly defined, there is strong  
51 evidence that acquired anti-parasite immunity is IgG-dependent<sup>8</sup> and cytophilic  
52 immunoglobulins (IgG1 & IgG3), which are capable of eliminating the parasites by  
53 opsonisation and/or by Antibody Dependent Cellular Immunity play an important role in  
54 premunity.<sup>37</sup> The higher parasite density during symptomatic episodes observed in the  
55  
56  
57  
58  
59  
60

asthma group suggests impaired development of acquired immunity. Impaired acquisition of immunity to malaria in children with asthma or atopic dermatitis may stem from their imbalanced Th1/Th2 response. Indeed, an atopic state may generate a tendency to develop a Th2 type immune response to *P. falciparum*. Dendritic cells that are oriented to a Th2 phenotype are more susceptible to orient the acquired immune response towards a Th2 profile.<sup>40</sup> Orientation of the immune response towards a Th2 profile by asthma or atopic dermatitis would result in a poor Th1 response (and hence development of protective IgG immunoglobulins), considered to be the dominant arm of the immune response enabling resistance to infectious disease in children.<sup>41</sup>

Many studies have revealed an important role of histamine, a key downstream effector molecule in allergic reaction, in the outcome of a malaria parasite infection.<sup>24-26,42-45</sup> Moreover, reports indicate that components of the innate immune system, including eosinophils, basophils, and mast cells (MCs), could play important roles in the pathogenesis of malaria.<sup>42</sup> Increased levels of histamine in plasma and tissue, derived from basophils and MCs, notably following stimulation by IgE through the high affinity receptor FcεR1, are associated with the severity of disease in humans infected with *P. falciparum* and in animal malaria models.<sup>25,26</sup> Chlorpheniramine, a H1 agonist reversed resistance to chloroquine and amodiaquine both *in vivo* and *in vitro*.<sup>43</sup> Moreover, astemizole, another H1 agonist, was identified as an anti-malarial agent in a clinical drug library screen.<sup>44</sup> Finally, *P. falciparum* produces translationally controlled tumor protein, which is a homolog of the mammalian histamine-releasing factor that causes histamine release from human basophils.<sup>45</sup>

**Further research**

Our results provide the first birth cohort study addressing the link between malaria and allergic diseases. They contribute to a growing body of evidence that the pathologies are related. ISAAC has revealed a steady but significant increase in prevalence rates of asthma and allergic diseases in Africa. Whilst the majority of studies have focused on large cities, there is increasing urbanization throughout Africa, as well as improved access to primary health care in many areas. A key concern for ISAAC is the extent to which such societal evolution will result in an increase in allergic diseases. Increased urbanization in sub-Saharan Africa is changing the epidemiology of malaria and although resulting in a decrease in risk, will result in more severe clinical malaria in older individuals.<sup>46,47</sup> Moreover, a large

consumption of anti-malarial drugs in the urban areas provides substantial drug pressure fostering, the selection of drug-resistant parasites. Despite the encouraging recent decrease in malaria incidence rates, even in rural areas, an additional significant concern is the extent to which such an increase in allergy will exacerbate the burden of malaria. Given the demonstrated anti-parasitic effect of anti-histamines,<sup>48</sup> administration of anti-histamines to atopic children will likely reduce the burden of clinical malaria in these children, increase the efficacy of first-line treatment anti-malarials<sup>49</sup> and alleviate the non-infectious consequences of atopy. Clinical intervention studies should be envisaged.

### What is already known on this topic

There are several reports of the beneficial effects of anti-histamines for malaria chemoprophylaxis<sup>24-26,48</sup> as well as our previous work<sup>20</sup> showing that chromosomal regions associated with malaria are also linked to allergy and atopy.<sup>17-19</sup> There are two epidemiological studies showing opposite effects of malaria on atopy.<sup>22,38</sup>

### What this study adds

Using a longitudinal malaria study birth cohort, we identified an association of asthma and atopic dermatitis with susceptibility to clinical *P. falciparum* episodes. Importantly the increase in risk of malaria associated with these allergic conditions occurred only after the peak clinical incidence of disease in the population, suggesting that they delay the development of clinical immunity to malaria.

We are grateful to the villagers of Dielmo for their participation and sustained collaboration in this project as well as the field workers (Abdoulaye Badiane) and the data manager (Joseph Faye) for their contribution to the project and in generating and maintaining the malaria database. We are indebted to Michel Thiakane, a paediatric allergologist, head of the Paediatric Service, Principal hospital, Dakar, Senegal and Marie-Thérèse Guinnepain, dermatologist, Institut Pasteur clinic, Paris, France for aid in elaborating the ISAAC questionnaire and advising on clinical diagnosis of allergy in Senegal. We specially thank the children and parents or guardians who participated in the cross-sectional survey 'Pallergo'. We thank the International Division of the Institut Pasteur that has given full support to this study.

STROBE: This article has been prepared according to the STROBE checklist guidelines.

Funding: Institut Pasteur de Dakar, Institut Pasteur and Agence Nationale de la Recherche, France (ANR 11-BSV1-027-01). The funding source had no role in study design, data collection, data analysis, data interpretation, or writing of the report. The corresponding author had full access to all the data in the study and had final responsibility for the decision to submit for publication.

Contributors: LB, SM, and RP made substantial contributions to the concept and design of the study. MH, HB, BG, SB, FDS, and AT were involved in acquisition of the data. CL, AF, OMP, AS and RP contributed to the analysis and interpretation of the data. MH, CL, HB, BG, SB, FDS, AF, AT, LB, OMP, SM, AS and RP critically reviewed the report and approved its final version for submission. All authors had full access to all of the data in the study and can take responsibility for the integrity of the data and the accuracy of the data analysis. MH and RP are guarantors.

Competing interests: All authors have completed the ICMJE uniform disclosure form at [www.icmje.org/coi\\_disclosure.pdf](http://www.icmje.org/coi_disclosure.pdf) (available on request from the corresponding author) and declare: no financial relationships with any organisations that might have an interest in the submitted work in the previous three years; no other relationships or activities that could appear to have influenced the submitted work.

Ethical approval: The allergy study was approved by the Senegalese National Ethics committee (2009/N°46). Renewed approval of the longitudinal malaria study was obtained from the same committee (2006/N°969).

Data sharing: The allergy database will be made available on-line. The longitudinal malaria data set will be made available following discussion with the coordinators of the three Institutes that govern the dataset through contact with the corresponding author.

Copyright: The Corresponding Author has the right to grant on behalf of all authors and does grant on behalf of all authors, a worldwide licence to the Publishers and its licensees in perpetuity, in all forms, formats and media (whether known now or created in the future), to i) publish, reproduce, distribute, display and store the Contribution, ii) translate the Contribution into other languages, create adaptations, reprints, include within collections

and create summaries, extracts and/or, abstracts of the Contribution, iii) create any other derivative work(s) based on the Contribution, iv) to exploit all subsidiary rights in the Contribution, v) the inclusion of electronic links from the Contribution to third party material where-ever it may be located; and, vi) licence any third party to do any or all of the above.

## References

1. WAO, World Allergy Organization - <http://www.worldallergy.org/index.php>. 2010.
2. Asher MI, Montefort S, Björkstén B, Lai CK, Strachan DP, Weiland SK, et al. Worldwide time trends in the prevalence of symptoms of asthma, allergic rhinoconjunctivitis, and eczema in childhood: ISAAC Phases One and Three repeat multicountry cross-sectional surveys. *Lancet* 2006; 368: 733-43.
3. Mosmann TR, Coffman RL. TH1 and TH2 cells: different patterns of lymphokine secretion lead to different functional properties. *Ann Rev Immunol* 1989; 7: 145–73.
4. Zhu J, Paul WE. CD4 T cells: fates, functions, and faults. *Blood* 2008; 112: 1557–69.
5. Elghazali G, Perlmann H, Rutta AS, Perlmann P, Troye-Blomberg M. Elevated plasma levels of IgE in *Plasmodium falciparum*-primed individuals reflect an increased ratio of IL-4 to interferon-gamma (IFN-gamma)-producing cells. *Clin Exp Immunol* 1997; 109: 84-9.
6. Perlmann P, Perlmann H, ElGhazali G, Blomberg MT. IgE and tumor necrosis factor in malaria infection. *Immunol Lett* 1999; 65: 29-33.
7. Tangteerawatana P, Perlmann H, Hayano M, Kalambaheti T, Troye-Blomberg M, Khusmith S. IL4 gene polymorphism and previous malaria experiences manipulate anti-*Plasmodium falciparum* antibody isotype profiles in complicated and uncomplicated malaria. *Malaria J* 2009 ; 8: 286-95.
8. Cohen S, McGregor IA, Carrington S. Gamma-globulin and acquired immunity to human malaria. *Nature* 1961; 192: 733–7.
9. Perlmann H, Helmbj H, Hagstedt M, Carlson J, Larsson PH, Troye-Blomberg M, et al. IgE elevation and IgE anti-malarial antibodies in *Plasmodium falciparum*

malara:association of high IgE levels with cerebral malaria. *Clin Exp Immunol* 1994; 97: 284-92.

10. Duarte J, Deshpande P, Guiyedi V, Mécheri S, Fesel C, Cazenave PA, et al. Total and functional parasite specific IgE responses in Plasmodium falciparum-infected patients exhibiting different clinical status. *Malar J* 2007; 6:1.

11. Stein RT, Sherrill D, Morgan WJ, Holberg CJ, Halonen M, Taussig LM et al. Respiratory syncytial virus in early life and risk of wheeze and allergy by age 13 years. *Lancet* 1999; 354: 541-5.

12. Sigurs N, Gustafsson PM, Bjarnason R, Lundberg F, Schmidt S, Sigurbergsson F et al. Severe respiratory syncytial virus bronchiolitis in infancy and asthma and allergy at age 13. *Am J Resp Crit Care Med* 2005; 171: 137-41.

13. Shaheen SO, Aaby P, Hall AJ, Barker DJ, Heyes CB, Shiell AW, et al. Measles and atopy Guinea-Bissau. *Lancet* 1996; 347: 1792-96.

14. McIntire JJ, Umetsu SE, Macaubas C, Hoyte EG, Cinnioğlu C, Cavalli-Sforza LL et al. Immunology: hepatitis A virus link to atopic disease. *Nature* 2003; 425: 576.

15. Shirakawa T, Enomoto T, Shimazu S, Hopkin JM. The inverse association between tuberculin responses and atopic disorder. *Science* 1997; 275: 77-9.

16. Gould HJ, Takhar P, Harries HE, Chevetton E, Sutton BJ. The allergic march from *Staphylococcus aureus* superantigens to immunoglobulin E. *Chem Immunol Allergy* 2007; 93: 106-36.

17. Jang N, Stewart G, Jones G. Polymorphisms within the PHF11 gene at chromosome 13q14 are associated with childhood atopic dermatitis. *Genes Immun* 2005; 6: 262-4.

18. Kurz T, Hoffjan S, Hayes MG, Schneider D, Nicolae R, Heinzmann A, et al. Fine mapping and positional candidate studies on chromosome 5p13 identify multiple asthma susceptibility loci. *J Allergy Clin Immunol* 2006; 118: 396-402.

19. Zhang Y, Leaves NI, Anderson GG, Ponting CP, Broxholme J, Holt R, et al. Positional cloning of a quantitative trait locus on chromosome 13q14 that influences immunoglobulin E levels and asthma. *Nat Genet* 2003; 34: 181-6.

20. Sakuntabhai A, Ndiaye R, Casademont I, Peerapittayamongkol C, Rogier C, Tortevoeye P, et al. Genetic determination and linkage mapping of *Plasmodium falciparum* malaria related traits in Senegal. *PLoS ONE* 2008; 3: e2000.
21. Cargill M, Schrodin SJ, Chang M, Garcia VE, Brandon R, et al. A large-scale genetic association study confirms IL12B and leads to the identification of IL23R as psoriasis-risk genes. *Am J Hum Genet* 2007; 80: 273-90.
22. Haileamlak A, Dagoye D, Williams H, Venn AJ, Hubbard R, Britton J, et al. Early life risk factors for atopic dermatitis in Ethiopian children. *J Allergy Clin Immunol* 2005; 115: 370-6.
23. Kohara Y, Tanabe K, Matsuoka K, Kanda N, Matsuda H, Karasuyama H, et al. A major determinant quantitative-trait locus responsible for atopic dermatitis-like skin lesions in NC/Nga mice is located on Chromosome 9. *Immunogenetics* 2001; 53: 15-21.
24. Beghdadi W, Porcherie A, Schneider BS, Dubayle D, Peronet R, Huerre M, et al. Inhibition of histamine-mediated signaling confers significant protection against severe malaria in mouse models of disease. *J Exp Med* 2008; 205: 395-408.
25. Srichaikul T, Archararit N, Siriasawakul T, Viriyapanich T. Histamine changes in *Plasmodium falciparum* malaria. *Trans R Soc Trop Med Hyg* 1976; 70: 36-8.
26. Bhattacharya U, Roy S, Kar PK, Sarangi B, Lahiri SC. Histamine & kinin system in experimental malaria. *Indian J Med Res* 1988; 88: 558-63.
27. Trape JF, Tall A, Diagne N, Ndiath O, Ly AB, Faye J, et al. Malaria morbidity and pyrethroid resistance after the introduction of insecticide-treated bednets and artemisinin-based combination therapies: a longitudinal study. *Lancet Infect Dis* 2011; 11: 925-32.
28. Abecasis GR, Cherny SS, Cookson WO, Cardon LR. Merlin-- rapid analysis of dense genetic maps using sparse gene flow trees. *Nat Genet* 2001; 30: 97-101.
29. Asher MI, Keil U, Anderson HR, Beasley R, Crane J, Martinez F, et al. International Study of Asthma and Allergies in Childhood (ISAAC): rationale and methods. *Eur Respir J* 1995; 8: 483-91.

30. Yamada E, Vanna AT, Nasпитz CK, Solé D. International Study of Asthma and Allergies in Childhood (ISAAC): validation of the written questionnaire (eczema component) and prevalence of atopic eczema among Brazilian children. *J Investig Allergol Clin Immunol* 2002; 12: 34-41.

31. Nacher M. Malaria vaccine trials in a wormy world. *Trends Parasitol* 2001; 17: 563-5

32. Yazdanbakhsh M, Kremsner PG, van Ree R. Allergy, parasites, and the hygiene hypothesis. *Science* 2002; 296: 490-4.

33. Lawaly R, Konate L, Marrama L, Dia I, Diallo D, Diène Sarr F, et al. Impact of mosquito bites on asexual parasite density and gametocyte prevalence in asymptomatic chronic *Plasmodium falciparum* infections and correlation with IgE and IgG titres. *Infection and Immunity* 2012; 80: 2240-6.

34. Machado A, Loucoubar C, Grange L, Bureau JF, Sakuntabhai A, Paul R. Human genetic contribution to the outcome of infection with malaria parasites. In: *MALARIA PARASITES*, ISBN: 979-953-307-072-7, Okwa O (Ed.), INTECH, Rijeka 2012; 267-292.

35. Doolan DL, Dobaño C, Baird JK. Acquired Immunity to Malaria. *Clin Microbiol Rev* 2009; 22: 13–36.

36. Marsh K, Snow RW. Host-parasite interaction and morbidity in malaria endemic areas. *Philos Trans R Soc London B* 1997; 352: 1385–94.

37. Perignon JL, Druilhe P. Immune mechanisms underlying the premonition against *Plasmodium falciparum* malaria. *Mem Inst Oswaldo Cruz* 1994; 89 Suppl. 2: 51–3.

38. Lell B, Borrmann S, Yazdanbakhsh M, Kremsner PG. Atopy and malaria. *Wien Klin Wochenschr* 2001; 113: 927-9.

39. Westritschnig K, Sibanda E, Thomas W, Auer H, Aspöck H, Pittner G, et al. Analysis of the sensitization profile towards allergens in central Africa. *Clin Exp Allergy* 2003; 33: 22-7.

40. de Jong EC, Vieira PL, Kalinski P, Schuitemaker JH, Tanaka Y, Wierenga EA et al. Microbial compounds selectively induce Th1 cell-promoting or Th2 cell-promoting dendritic cells *in vitro* with diverse Th cell-polarizing signals. *J Immunol* 2002; 168: 1704–9.

41. Baird JK. Age-dependent characteristics of protection versus susceptibility to *Plasmodium falciparum*. *Ann Trop Med Parasitol* 1998; 92: 367–90.
42. Mecheri S. Contribution of allergic inflammatory response to the pathogenesis of malaria disease. *Biochim Biophys Acta* 2011; 1822: 49-56.
43. Sowunmi A, Gbotosho GO, Happi CT, Adedeji AA, Bolaji OM, Fehintola FA, et al. Enhancement of the antimalarial efficacy of amodiaquine by chlorpheniramine in vivo. *Mem Inst Oswaldo Cruz* 2007; 102: 417-9.
44. Chong CR, Chen X, Shi L, Liu JO, Sullivan DJ. A clinical drug library screen identifies astemizole as an antimalarial agent. *Nat Chem Biol* 2006; 2: 415-416.
45. MacDonald SM, Bhisutthibhan J, Shapiro TA, Rogerson SJ, Taylor TE, Tembo M, et al. Immune mimicry in malaria: *Plasmodium falciparum* secretes a functional histamine-releasing factor homolog *in vitro* and *in vivo*. *Proc Natl Acad Sci USA* 2001; 98: 10829-32.
46. De Silva PM, Marshall JM. Factors contributing to urban malaria transmission in sub-Saharan Africa: a systematic review. *J Trop Med* 2012; doi: 10.1155/2012/819563.
47. Bob NS, Diop BM, Renaud F, Marrama L, Durand P, Tall A, et al. Parasite polymorphism and severe malaria in Dakar (Senegal): a West African urban area. *PLoS One* 2010; 5: e9817.
48. Musonda CC, Whitlock GA, Witty MJ, Brun R, Kaiser M. Chloroquine-astemizole hybrids with potent *in vitro* and *in vivo* antiplasmodial activity. *Bioorg Med Chem Lett* 2009; 19: 481-4.
49. Egan TJ, Kaschula CH. Strategies to reverse drug resistance in malaria. *Curr Opin Infect Dis* 2007; 20: 598-604.

**Table 1 Classification of Asthma, Allergic rhinoconjunctivitis, Atopic dermatitis and overall Atopic status according to ISAAC questionnaire in children aged 0-14 from a malaria birth cohort.** N is total number of children examined and n-malaria represents those for whom malaria data were recorded. F is the number of females and M the number of males.

|                                     | N (F/M)     | %     | n-malaria (F/M) |
|-------------------------------------|-------------|-------|-----------------|
| <b>Asthma symptoms</b>              |             |       |                 |
| None                                | 153 (73/80) | 87.43 | 125 (59/66)     |
| Moderate                            | 4 (1/3)     | 2.29  | 4 (1/3)         |
| Severe                              | 18 (6/12)   | 10.29 | 14 4/10)        |
| <b>Rhinoconjunctivitis symptoms</b> |             |       |                 |
| None                                | 146 (64/82) | 83.43 | 120 (52/68)     |
| Moderate                            | 11 (8/3)    | 6.29  | 9(6/3)          |
| Severe                              | 18 (6/12)   | 10.29 | 14 (6/8)        |
| <b>Atopic dermatitis symptoms</b>   |             |       |                 |
| None                                | 159 (75/84) | 90.86 | 128 (60/68)     |
| Moderate                            | 11 (1/10)   | 6.29  | 11 (1/10)       |
| Severe                              | 5 (4/1)     | 2.86  | 4 (3/1)         |
| <b>Atopic tendency</b>              |             |       |                 |
| Unlikely                            | 119 (56/63) | 68.00 | 97 (46/51)      |
| Probable                            | 16 (8/8)    | 9.14  | 14 (6/8)        |
| Highly probable                     | 40 (16/24)  | 22.86 | 32 (12/20)      |

**Table 2 Impact of allergy status on risk of *P. falciparum* clinical episodes.** Shown are the *P* values and adjusted Odds Ratios with 95% confidence intervals calculated from the mixed model analyses. Values for the covariables Age ( $\geq 3.5$  years of age compared to  $< 3.5$  years of age), Trimestrial incidence of *P. falciparum* clinical episodes and HbAS (beta-globin sickle cell trait; AS compared to AA) are those from the Asthma model analysis. For clarity significant co-variables are shown in bold.

| Age groups $< 3.5$ years |                              | ORa         | 95% Confidence Intervals |             | <i>P</i> value                          |
|--------------------------|------------------------------|-------------|--------------------------|-------------|-----------------------------------------|
|                          |                              |             | Lower                    | Upper       |                                         |
| Atopy                    | <b>Both</b>                  | <b>1.65</b> | <b>1.20</b>              | <b>2.26</b> | <b><math>2.0 \times 10^{-3}</math></b>  |
|                          | $< 3.5$                      | 1.38        | 0.92                     | 2.08        | 0.124                                   |
|                          | <b><math>\geq 3.5</math></b> | <b>2.02</b> | <b>1.39</b>              | <b>2.93</b> | <b><math>2.1 \times 10^{-4}</math></b>  |
| Asthma                   | <b>Both</b>                  | <b>2.12</b> | <b>1.46</b>              | <b>3.08</b> | <b><math>8.0 \times 10^{-5}</math></b>  |
|                          | $< 3.5$                      | 1.50        | 0.90                     | 2.50        | 0.122                                   |
|                          | <b><math>\geq 3.5</math></b> | <b>2.33</b> | <b>1.50</b>              | <b>3.61</b> | <b><math>1.5 \times 10^{-4}</math></b>  |
| Atopic dermatitis        | Both                         | 1.05        | 0.65                     | 1.70        | 0.842                                   |
|                          | $< 3.5$                      | 0.84        | 0.49                     | 1.46        | 0.539                                   |
|                          | <b><math>\geq 3.5</math></b> | <b>3.15</b> | <b>1.56</b>              | <b>6.33</b> | <b><math>1.3 \times 10^{-3}</math></b>  |
| Rhinoconjunctivitis      | Both                         | 0.96        | 0.65                     | 1.41        | 0.818                                   |
|                          | $< 3.5$                      | 1.05        | 0.64                     | 1.72        | 0.853                                   |
|                          | $\geq 3.5$                   | 0.95        | 0.60                     | 1.52        | 0.834                                   |
| Age $\geq 3.5$           |                              | <b>0.48</b> | <b>0.40</b>              | <b>0.57</b> | <b><math>2.7 \times 10^{-15}</math></b> |
| Trimestrial incidence    |                              | <b>1.01</b> | <b>1.00</b>              | <b>1.01</b> | <b><math>1.8 \times 10^{-6}</math></b>  |
| HbAS                     |                              | <b>0.24</b> | <b>0.12</b>              | <b>0.47</b> | <b><math>3.7 \times 10^{-5}</math></b>  |

**Table 3 Impact of allergy status on the maximum *P. falciparum* parasite density during a clinical malaria episode.** Shown are the back-transformed mean parasite densities per microlitre and standard errors (SEM) estimated from the GLMM analyses after taking into account the other co-variables. Significantly different effects are shown in bold for clarity.

| Allergic condition  | Age groups  | Allergic status<br>(No/Yes) | Mean parasite density | SEM  | P value                     |
|---------------------|-------------|-----------------------------|-----------------------|------|-----------------------------|
| Atopy               | <b>Both</b> | <b>N</b>                    | <b>76.3</b>           | 13.8 | <b>0.0158</b>               |
|                     |             | <b>Y</b>                    | <b>131.0</b>          | 36.4 |                             |
|                     | <3.5        | N                           | 114.3                 | 23.7 | 0.148                       |
|                     |             | Y                           | 171.1                 | 56.0 |                             |
|                     | <b>≥3.5</b> | <b>N</b>                    | <b>48.4</b>           | 9.8  | <b>9.5x10<sup>-4</sup></b>  |
|                     |             | <b>Y</b>                    | <b>114.8</b>          | 37.1 |                             |
| Asthma              | <b>Both</b> | <b>N</b>                    | <b>78.1</b>           | 14.4 | <b>3.8 x10<sup>-3</sup></b> |
|                     |             | <b>Y</b>                    | <b>148.5</b>          | 44.3 |                             |
|                     | <3.5        | N                           | 114.8                 | 24.3 | 0.167                       |
|                     |             | Y                           | 171.9                 | 74.5 |                             |
|                     | <b>≥3.5</b> | <b>N</b>                    | <b>51.3</b>           | 9.7  | <b>6.2 x10<sup>-3</sup></b> |
|                     |             | <b>Y</b>                    | <b>105.3</b>          | 41.0 |                             |
| Atopic dermatitis   | Both        | N                           | 82.6                  | 15.0 | 0.605                       |
|                     |             | Y                           | 93.9                  | 38.9 |                             |
|                     | <3.5        | N                           | 122.6                 | 25.5 | 0.425                       |
|                     |             | Y                           | 133.9                 | 63.5 |                             |
|                     | <b>≥3.5</b> | <b>N</b>                    | <b>52.3</b>           | 11.0 | <b>0.014</b>                |
|                     |             | <b>Y</b>                    | <b>135.4</b>          | 70.7 |                             |
| Rhinoconjunctivitis | Both        | N                           | 81.5                  | 14.8 | 0.570                       |
|                     |             | Y                           | 111.4                 | 39.0 |                             |
|                     | <3.5        | N                           | 118.8                 | 25.1 | 0.537                       |
|                     |             | Y                           | 166.3                 | 69.9 |                             |
|                     | <b>≥3.5</b> | <b>N</b>                    | <b>54.6</b>           | 11.3 | 0.327                       |
|                     |             | <b>Y</b>                    | <b>80.9</b>           | 33.7 |                             |

**Figure 1** Annual incidence rate of clinical *P. falciparum* episodes per 100 children (bold line). In order to overcome the fluctuations of the annual incidence rate, we fit second (dotted line), third (dashed line) and fourth (solid line) degree polynomial trend lines to the data (bold line). The corresponding R-squared values are 0.70, 0.91 and 0.99 respectively indicating an accurate fit for third and fourth order polynomials. The inflexion on these two trend lines indicates the onset of acquisition of clinical immunity at approximately 3 to 4 years of age.

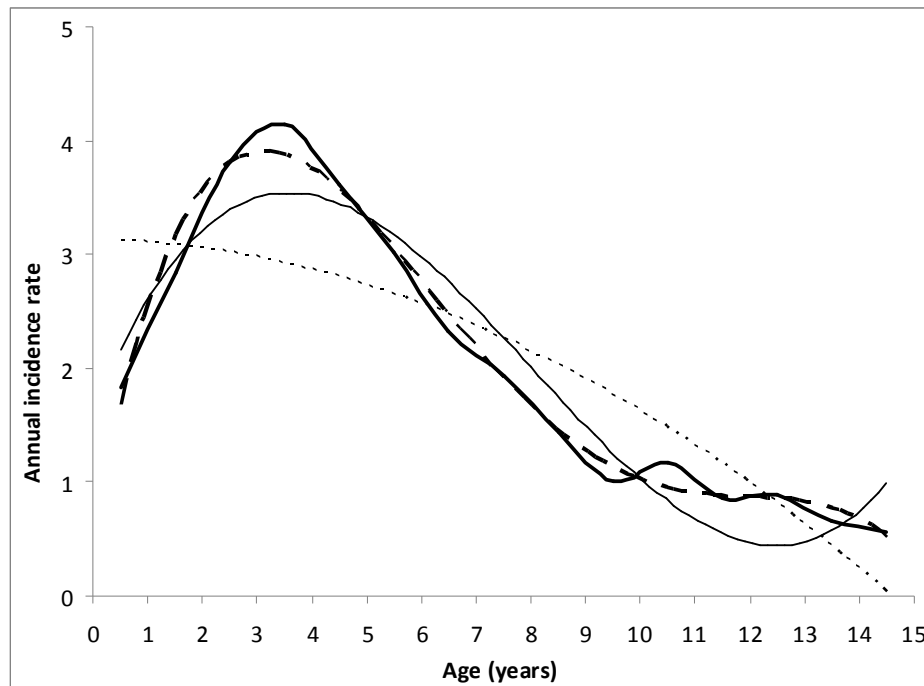

**Figure 2** Mean cumulative number of *P. falciparum* clinical episodes with age for the (A) Asthma, (B) Rhinoconjunctivitis and (C) Atopic dermatitis classes and overall Atopy class (D) (bold lines) compared to individuals without symptoms of each respective allergy type (thin lines). In all cases moderate and severe classes are combined and compared to individuals without allergy symptoms. Note there are no children older than 11 years of age with Atopic dermatitis.

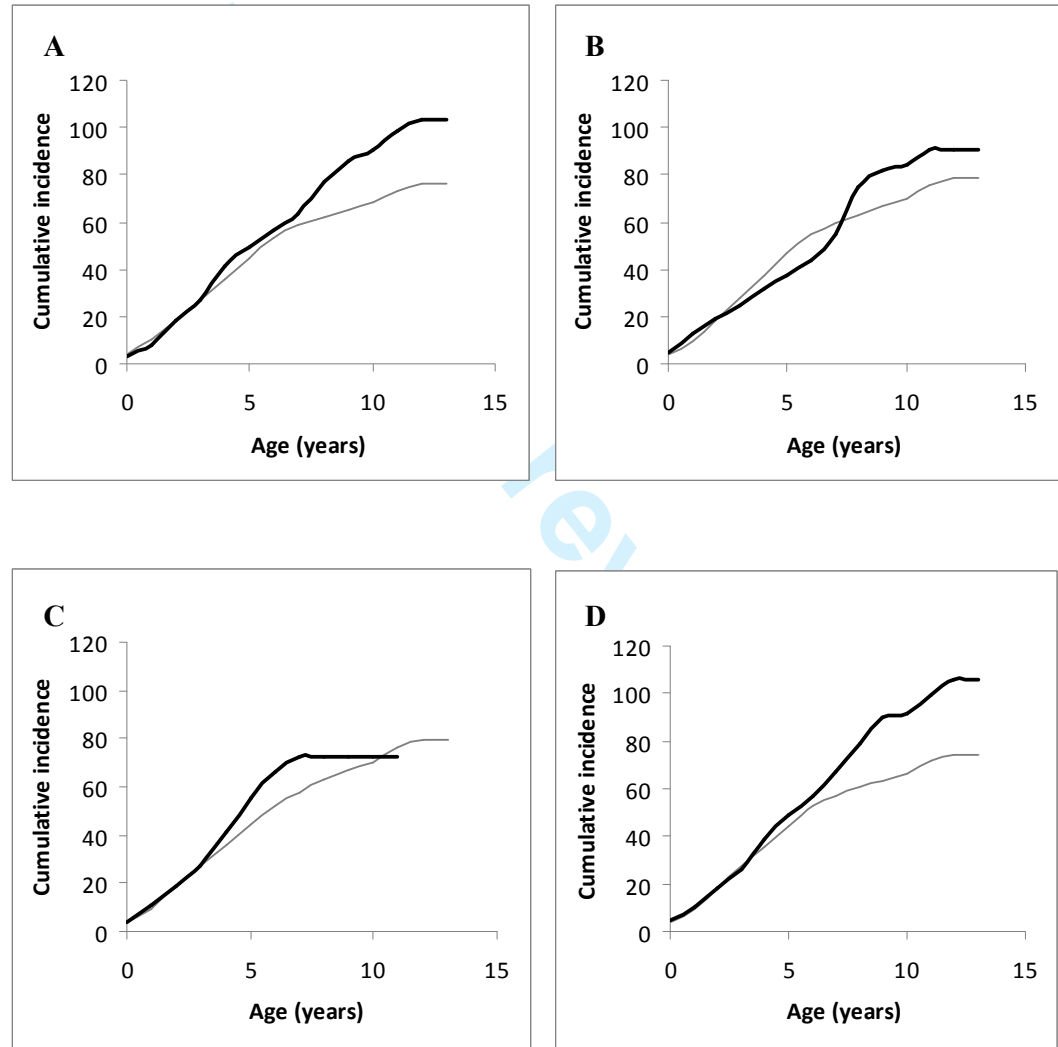

### Pedigree-based genetic relatedness

The Genetic covariance between two individuals can be computed using the pedigree information. For individuals A and B, a given pair in a pedigree, the genetic covariance is computed as  $r(A,B) = 2 \times \text{coancestry}(A,B)$  where the *coancestry* between A and B is calculated referring to the method presented by Falconer and Mackay in 1996 (Falconer and Mackay 1996):  $\text{coancestry}(A,B) = \sum_p (1/2)^{n(p)} \times (1 + I_{\text{Common Ancestor}})$  where  $p$  is the number of paths in the pedigree linking A and B,  $n(p)$  the number of individuals (including A and B) for each path  $p$  and  $I_X$  is the *inbreeding* coefficient of X also equal to the *coancestry* between the two parents of X,  $I_X$  is set to 0 if X is a founder.

**Illustration:** Consider, as an example, the pedigree below containing 18 individuals named {A, B, ..., R} for the calculation of genetic covariance's.

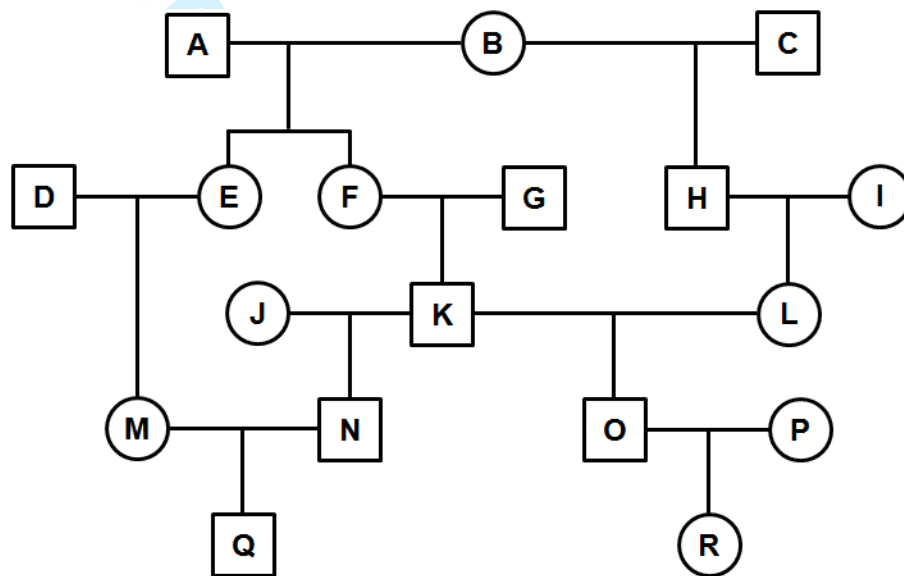

**Pedigree structure.**

The genetic relatedness between individuals N and O is equal to 0.266. This value is calculated as followed:

The number of paths linking N and O from the pedigree structure above is  $p = 2$ .

As illustrated below:

- **Path 1** contains  $n(1) = 3$  individuals {N, K, O} with K as the common ancestor. Inbreeding coefficient of K,  $I_K$ , is the *coancestry* between the two parents of K (F and G) and is null because F and G are not genetically linked.
- **Path 2** contains  $n(2) = 7$  individuals {N, K, F, B, H, L, O} with B as the common ancestor. Inbreeding coefficient of B,  $I_B$ , is null because B is a founder.

Therefore, genetic relatedness between individuals N and O is:

$$\begin{aligned}
 &= 2 \times (0.5^{n(1)} \times (1 + I_K) + 0.5^{n(2)} \times (1 + I_B)) \\
 &= 2 \times (0.5^3 \times (1 + 0) + 0.5^7 \times (1 + 0)) = 0.266
 \end{aligned}$$

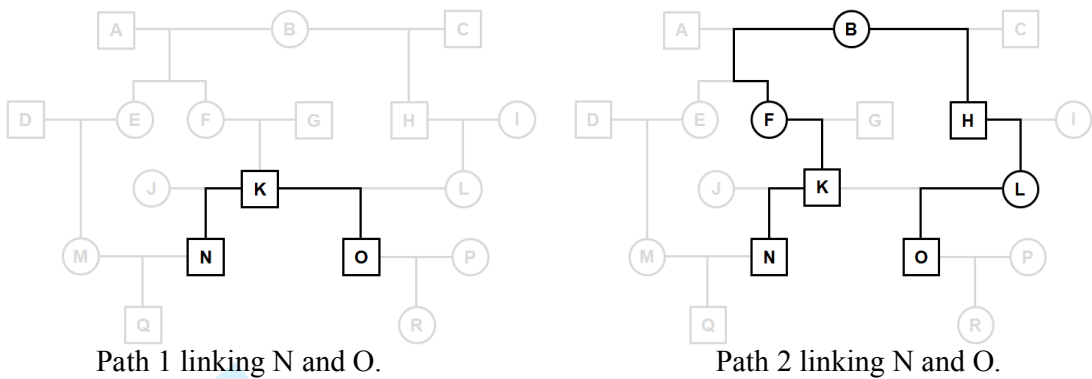

Defining an equivalent model design where individual effects are independent using the genetic relatedness matrix:

Let us rename  $Y^* = l(\mu)$ .  $Y^*$  can be consider as a linearization of the phenotype through the link function  $l$ . The expected mean of  $Y^*$  and the variance of  $Y^*$  are:

(i)  $E(Y^*) = E(X\beta + Z\gamma + \varepsilon)$   
 $= E(X\beta) + E(Z\gamma) + E(\varepsilon) = X \times E(\beta) + Z \times E(\gamma) + E(\varepsilon)$   
 $= X\beta$  (asymptotically).

(ii)  $Var(Y^*) = Var(X\beta + Z\gamma + \varepsilon)$   
 $= Var(Z\gamma + \varepsilon)$  (as  $X\beta$  is the fixed part, thus has variance equal to 0)  
 $= Var(Z\gamma) + Var(\varepsilon)$  (as  $\gamma$  and  $\varepsilon$  are independent)  
 $= Z \times Var(\gamma) \times Z^T + Var(\varepsilon)$  ( $Z^T$  is the transpose of  $Z$ )  
 $= Z(A\sigma_g^2)Z^T + I\sigma_r^2$   
 $= ZAZ^T\sigma_g^2 + I\sigma_r^2$

If individuals were independent, i.e.  $A = I_N$ , variance of  $Y^*$  could be expressed as  $ZZ^T\sigma_g^2 + I\sigma_r^2$ . However, using linear algebra theory by the method “Cholesky decomposition of a matrix”, we can show that there is an equivalent expression of the variance of  $Y^*$  corresponding to the modeling of data from independent individuals, having  $\gamma^*$  as an equivalent vector of random effects and  $Z^*$  an equivalent design matrix relating  $\gamma^*$  to  $Y^*$  so that:  
 $Var(Y^*) = Z^*(I\sigma_g^2)Z^{*T} + I\sigma_r^2$ .  $I\sigma_g^2$  is then the covariance matrix of the equivalent independent random individual effects  $\gamma^*$ .

**Theorem: Cholesky decomposition of a matrix**  
If  $A$  is a symmetric positive-definite matrix, there is a triangular matrix  $L$  so that  $A$  can be written as  $A = LL^T$ .  $L$  can be seen as the “square root” of the matrix  $A$ .  
Note that the genetic relatedness matrix  $A$  computed using the pedigree information (Falconer and Mackay 1996) is a positive-definite matrix, unless identical twins are in the pedigree in which case it would be positive semi-definite.

**Equivalent model with independent random effects:** We set  $A = LL^T$  then:  
 $Var(Y^*) = Z(A\sigma_g^2)Z^T + I\sigma_r^2$   
 $= Z(LL^T\sigma_g^2)Z^T + I\sigma_r^2$

$$\begin{aligned}
 &= ZLL^T Z^T \sigma_g^2 + I\sigma_r^2 \\
 &= (ZL)(ZL)^T \sigma_g^2 + I\sigma_r^2 \\
 &= (Z^*)(Z^*)^T \sigma_g^2 + I\sigma_r^2 \quad (\text{where we set } Z^* = ZL)
 \end{aligned}$$

Then, if we define  $\gamma^* = L^{-1}\gamma$ , we can rewrite the model as:

$$Y^* = X\beta + Z^*\gamma^* + \varepsilon \quad (\text{because } Z\gamma = Z(LL^{-1})\gamma = (ZL)(L^{-1}\gamma) = Z^*\gamma^*),$$

and the  $\gamma_i^*$  are independent, in other terms  $\text{Var}(\gamma^*) = I\sigma_g^2$ , as demonstrated below:

We assumed that  $\gamma \sim N(0, A\sigma_g^2)$ . Then  $\gamma^* = L^{-1}\gamma$  is also distributed as a multivariate Normal with mean  $E(\gamma^*) = L^{-1}E(\gamma) = L^{-1} \times 0 = 0$  and variance:

$$\begin{aligned}
 \text{Var}(\gamma^*) &= (L^{-1}) \times \text{Var}(\gamma) \times (L^{-1})^T \\
 &= (L^{-1}) \times A\sigma_g^2 \times (L^{-1})^T = (L^{-1})LL^T(L^{-1})^T \sigma_g^2 \\
 &= (L^{-1}L)(L^{-1}L)^T \sigma_g^2 \\
 &= I\sigma_g^2
 \end{aligned}$$

The random effects are now independent and then the classical mixed model assuming independence between levels (here individuals) is applied, and the estimate of fixed effects obtained are fine, i.e. corrected for genetic relationships.

## References

Falconer DS, Mackay TFC (1996) Introduction to Quantitative Genetics. 4<sup>th</sup> Edn. London: Longman.

1  
2  
3  
4  
5  
6  
7  
8  
9  
10  
11  
12  
13  
14  
15  
16  
17  
18  
19  
20  
21  
22  
23  
24  
25  
26  
27  
28  
29  
30  
31  
32  
33  
34  
35  
36  
37  
38  
39  
40  
41  
42  
43  
44  
45  
46  
47  
48  
49

Supplementary Tables

**Table S1 Number of person-trimesters contributed by number of children by age class and the number who had severe/moderate allergy symptoms, for whom malaria data were also available.** AS – Asthma, AD – Atopic dermatitis, RC – Rhinoconjunctivitis. Shown also are the numbers of these individuals suffering from two or all three allergy conditions.

| Age group | N° person-trimesters | N° people | AS | AD | RC | AS+AD | AS+RC | AD+RC | AS+AD+RC |
|-----------|----------------------|-----------|----|----|----|-------|-------|-------|----------|
| ]1        | 7                    | 6         | 1  | 2  | 2  | 0     | 1     | 0     | 0        |
| ]2        | 21                   | 9         | 0  | 1  | 3  | 0     | 0     | 0     | 0        |
| ]3        | 48                   | 11        | 1  | 1  | 2  | 0     | 0     | 1     | 0        |
| ]4        | 119                  | 12        | 1  | 2  | 3  | 0     | 0     | 1     | 0        |
| ]5        | 102                  | 11        | 3  | 4  | 3  | 2     | 1     | 2     | 1        |
| ]6        | 125                  | 11        | 1  | 1  | 0  | 0     | 0     | 0     | 0        |
| ]7        | 303                  | 11        | 1  | 2  | 1  | 1     | 0     | 0     | 0        |
| ]8        | 340                  | 12        | 1  | 1  | 1  | 1     | 0     | 0     | 0        |
| ]9        | 362                  | 10        | 2  | 0  | 1  | 0     | 1     | 0     | 0        |
| ]10       | 610                  | 17        | 1  | 0  | 3  | 0     | 0     | 0     | 0        |
| ]11       | 77                   | 4         | 2  | 1  | 0  | 0     | 0     | 0     | 0        |
| ]12       | 484                  | 16        | 3  | 0  | 3  | 0     | 1     | 0     | 0        |
| ]13       | 390                  | 10        | 1  | 0  | 0  | 0     | 0     | 0     | 0        |
| ]14       | 105                  | 3         | 0  | 0  | 1  | 0     | 0     | 0     | 0        |
| Total     | 3093                 | 143       | 18 | 15 | 23 | 4     | 4     | 4     | 1        |

**Table S2 Summary of total number of person-trimesters with non-malaria and symptomatic *P. falciparum* clinical presentations and total number of non-malaria episodes according to age class.** Given are the number of people contributing to each type of presentation.

|                                                   | Age group (years) |      |
|---------------------------------------------------|-------------------|------|
|                                                   | <3·5              | ≥3·5 |
| Total person-trimesters                           | 1283              | 1810 |
| People                                            | 126               | 113  |
| Total <i>P. falciparum</i> symptomatic trimesters | 963               | 1102 |
| People                                            | 114               | 108  |
| Total non-malaria episodes                        | 754               | 1114 |
| People                                            | 123               | 109  |

**Table S3 Effect of changing age threshold on impact of allergy on the risk of clinical malaria and concomitant parasite density.** Given are Odds Ratio with 95% confidence intervals, for clinical malaria episodes and the beta coefficient and standard error for parasite density. Corresponding P values are also given. Values are from the nested GLMM analyses.

| A. Malaria episodes |      |                 |                      |      |                 |         | B. Parasite density |                 |                      |                 |                      |
|---------------------|------|-----------------|----------------------|------|-----------------|---------|---------------------|-----------------|----------------------|-----------------|----------------------|
| Age cut-off (years) | OR   | 95% CI          | P value              | OR   | 95% CI          | P value | Age cut-off         | beta coeff (se) | P value              | beta coeff (se) | P value              |
| Atopy               |      | above threshold |                      |      | below threshold |         | Atopy               | above threshold |                      | below threshold |                      |
| 1.5                 | 1.80 | 1.25-2.59       | 1.7x10 <sup>-3</sup> | 1.57 | 0.85-2.89       | 0.15    | 1.5                 | 0.70 (0.27)     | 9.2x10 <sup>-3</sup> | 0.54 (0.35)     | 0.12                 |
| 2.5                 | 2.00 | 1.39-2.88       | 2.0x10 <sup>-4</sup> | 1.23 | 0.76-1.99       | 0.40    | 2.5                 | 0.79 (0.26)     | 2.6x10 <sup>-3</sup> | 0.35 (0.29)     | 0.23                 |
| 3.5                 | 2.02 | 1.39-2.93       | 2.1x10 <sup>-4</sup> | 1.38 | 0.92-2.08       | 0.12    | 3.5                 | 0.85 (0.26)     | 9.5x10 <sup>-4</sup> | 0.37 (0.26)     | 0.15                 |
| 4.5                 | 2.10 | 1.42-3.10       | 1.6x10 <sup>-4</sup> | 1.41 | 0.98-2.04       | 0.063   | 4.5                 | 0.87 (0.25)     | 6.9x10 <sup>-4</sup> | 0.40 (0.23)     | 0.09                 |
| 5.5                 | 1.64 | 1.07-2.52       | 0.02                 | 1.67 | 1.17-2.37       | 0.004   | 5.5                 | 0.73 (0.27)     | 7.4x10 <sup>-3</sup> | 0.48 (0.22)     | 3.4x10 <sup>-3</sup> |
| Asthma              |      |                 |                      |      |                 |         | Asthma              |                 |                      |                 |                      |
| 1.5                 | 1.98 | 1.29-3.03       | 1.8x10 <sup>-3</sup> | 1.46 | 0.69-3.19       | 0.34    | 1.5                 | 0.66 (0.31)     | 0.03                 | 0.30 (0.44)     | 0.48                 |
| 2.5                 | 2.30 | 1.49-3.55       | 1.6x10 <sup>-4</sup> | 1.15 | 0.63-2.09       | 0.65    | 2.5                 | 0.78 (0.30)     | 0.01                 | 0.26 (0.36)     | 0.48                 |
| 3.5                 | 2.33 | 1.50-3.61       | 1.5x10 <sup>-4</sup> | 1.50 | 0.90-2.50       | 0.12    | 3.5                 | 0.82 (0.30)     | 6.2x10 <sup>-3</sup> | 0.43 (0.31)     | 0.17                 |
| 4.5                 | 2.30 | 1.48-3.59       | 2.4x10 <sup>-4</sup> | 1.76 | 1.11-2.80       | 0.017   | 4.5                 | 0.81 (0.29)     | 5.8x10 <sup>-3</sup> | 0.56 (0.28)     | 0.049                |
| 5.5                 | 1.98 | 1.22-3.22       | 0.006                | 2.06 | 1.33-3.18       | 0.0011  | 5.5                 | 0.72 (0.31)     | 0.02                 | 0.62 (0.27)     | 0.02                 |
| Atopic Dermatitis   |      |                 |                      |      |                 |         | Atopic Dermatitis   |                 |                      |                 |                      |
| 1.5                 | 2.05 | 1.18-3.56       | 0.01                 | 0.91 | 0.42-1.97       | 0.80    | 1.5                 | 0.80 (0.37)     | 0.03                 | 0.72 (0.46)     | 0.12                 |
| 2.5                 | 2.49 | 1.36-4.57       | 3.1x10 <sup>-3</sup> | 0.82 | 0.44-1.53       | 0.53    | 2.5                 | 0.77 (0.38)     | 0.044                | 0.52 (0.39)     | 0.19                 |
| 3.5                 | 3.15 | 1.56-6.33       | 1.3x10 <sup>-3</sup> | 0.84 | 0.49-1.46       | 0.54    | 3.5                 | 0.99 (0.40)     | 0.014                | 0.28 (0.35)     | 0.42                 |
| 4.5                 | 3.79 | 1.61-8.92       | 2.3x10 <sup>-3</sup> | 0.94 | 0.57-1.57       | 0.82    | 4.5                 | 0.98 (0.47)     | 0.036                | 0.29 (0.32)     | 0.37                 |
| 5.5                 | 1.33 | 0.47-3.77       | 0.59                 | 1.19 | 0.73-1.96       | 0.49    | 5.5                 | 0.26 (0.61)     | 0.67                 | 0.38 (0.31)     | 0.22                 |
| Rhinoconjunctivitis |      |                 |                      |      |                 |         | Rhinoconjunctivitis |                 |                      |                 |                      |
| 1.5                 | 1.04 | 0.66-1.62       | 0.88                 | 1.01 | 0.51-2.01       | 0.98    | 1.5                 | 0.36 (0.32)     | 0.27                 | 0.18 (0.41)     | 0.66                 |
| 2.5                 | 1.01 | 0.64-1.61       | 0.96                 | 0.96 | 0.55-1.68       | 0.89    | 2.5                 | 0.28 (0.33)     | 0.40                 | 0.25 (0.35)     | 0.48                 |
| 3.5                 | 0.95 | 0.60-1.52       | 0.83                 | 1.05 | 0.64-1.72       | 0.85    | 3.5                 | 0.31 (0.32)     | 0.33                 | 0.19 (0.31)     | 0.54                 |
| 4.5                 | 0.87 | 0.54-1.42       | 0.59                 | 1.06 | 0.68-1.66       | 0.79    | 4.5                 | 0.20 (0.32)     | 0.53                 | 0.22 (0.28)     | 0.44                 |
| 5.5                 | 0.81 | 0.48-1.36       | 0.43                 | 1.07 | 0.70-1.64       | 0.74    | 5.5                 | 0.10 (0.33)     | 0.75                 | 0.23 (0.27)     | 0.39                 |

**Table S4 Frequency of non-malaria episodes (number of days of presence divided by number of non-malaria episodes) according to allergic status and age group.** The *P* value is that from the GLMM analyses of the effect of allergic status by age group on the number of non-malaria episodes per person-trimester.

| Allergic condition  | Allergic status<br>(No/Yes) | Age group (years) |       | <i>P</i> value |
|---------------------|-----------------------------|-------------------|-------|----------------|
|                     |                             | <3·5              | >3·5  |                |
| Atopy               | N                           | 78·2              | 85·9  | 0·105          |
|                     | Y                           | 87·2              | 102·6 |                |
| Asthma              | N                           | 79·6              | 87·3  | 0·319          |
|                     | Y                           | 82·5              | 100·2 |                |
| Atopic dermatitis   | N                           | 80·9              | 88·2  | 0·323          |
|                     | Y                           | 73·4              | 101·9 |                |
| Rhinoconjunctivitis | N                           | 77·9              | 88·3  | 0·167          |
|                     | Y                           | 94·9              | 91·8  |                |

Figure S1. Incidence of clinical cases per 100 person-trimesters in children under 15 years of age.

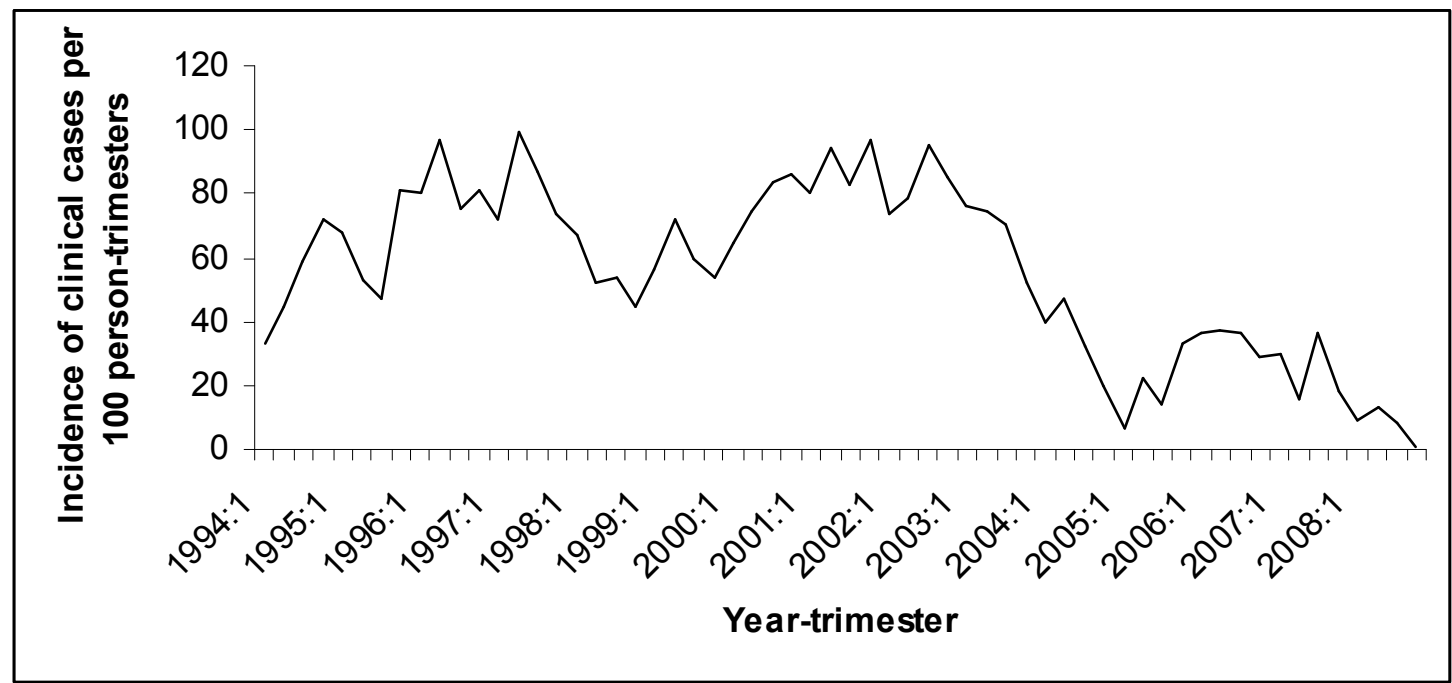

Figure S2. Cumulative incidence of clinical cases according to allergy class predicted by the statistical model.

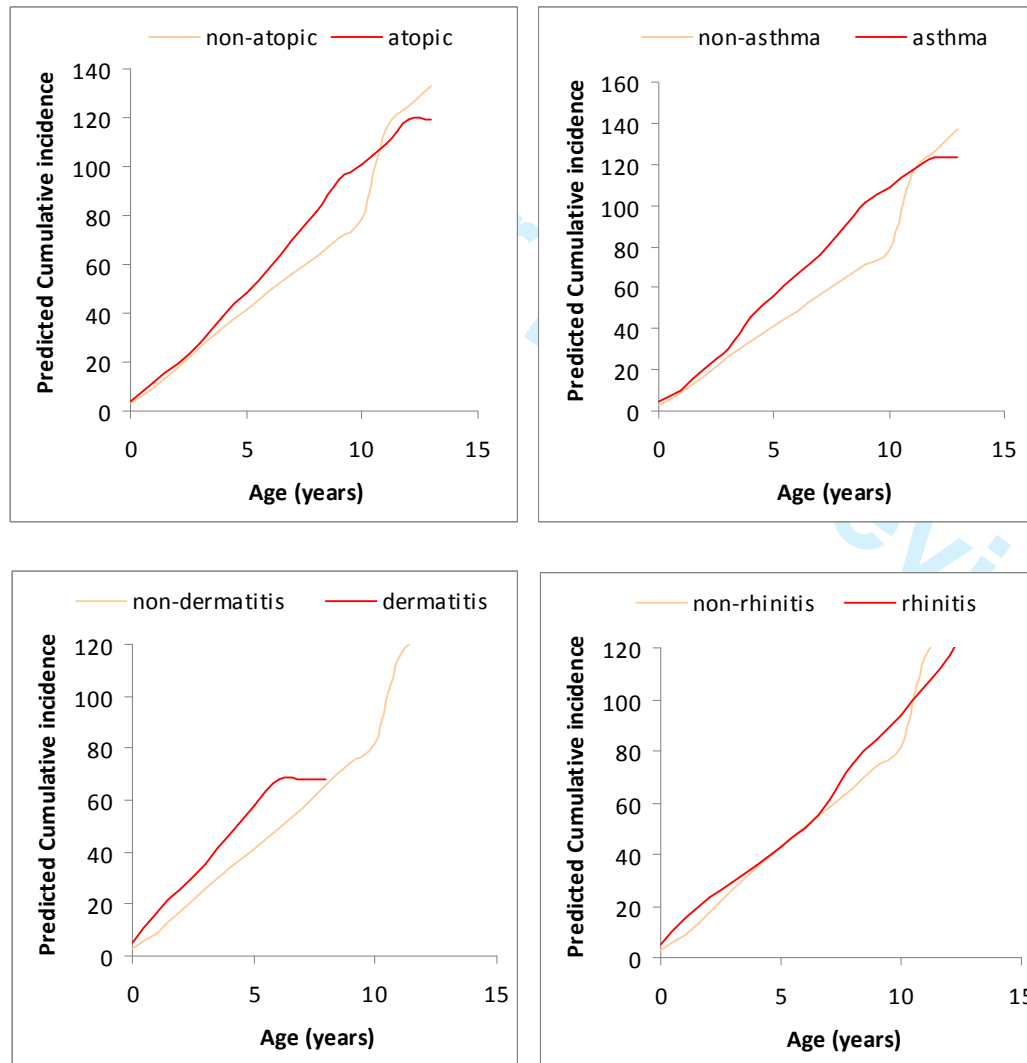

1  
2  
3  
4  
5  
6  
7  
8  
9  
10  
11  
12  
13  
14  
15  
16  
17  
18  
19  
20  
21  
22  
23  
24  
25  
26  
27  
28  
29  
30  
31  
32  
33  
34  
35  
36  
37  
38  
39  
40  
41  
42  
43  
44  
45  
46  
47  
48  
49

**Figure S3. Graphical control model for parasite density**

These figures provide a graphical checking of model goodness of fit. Figure A is the scatter plot of the natural logarithm of the observed parasite density and is compared to Figure B, which is the scatter plot of the natural logarithm of the predicted parasite density by the model; on both figures A and B the y-axes give the values for the log of the parasite density. Figure C shows the distribution of the residuals with the predicted values and Figure D is the histogram of the residuals; both figures C and D show the residuals normally distributed around zero.

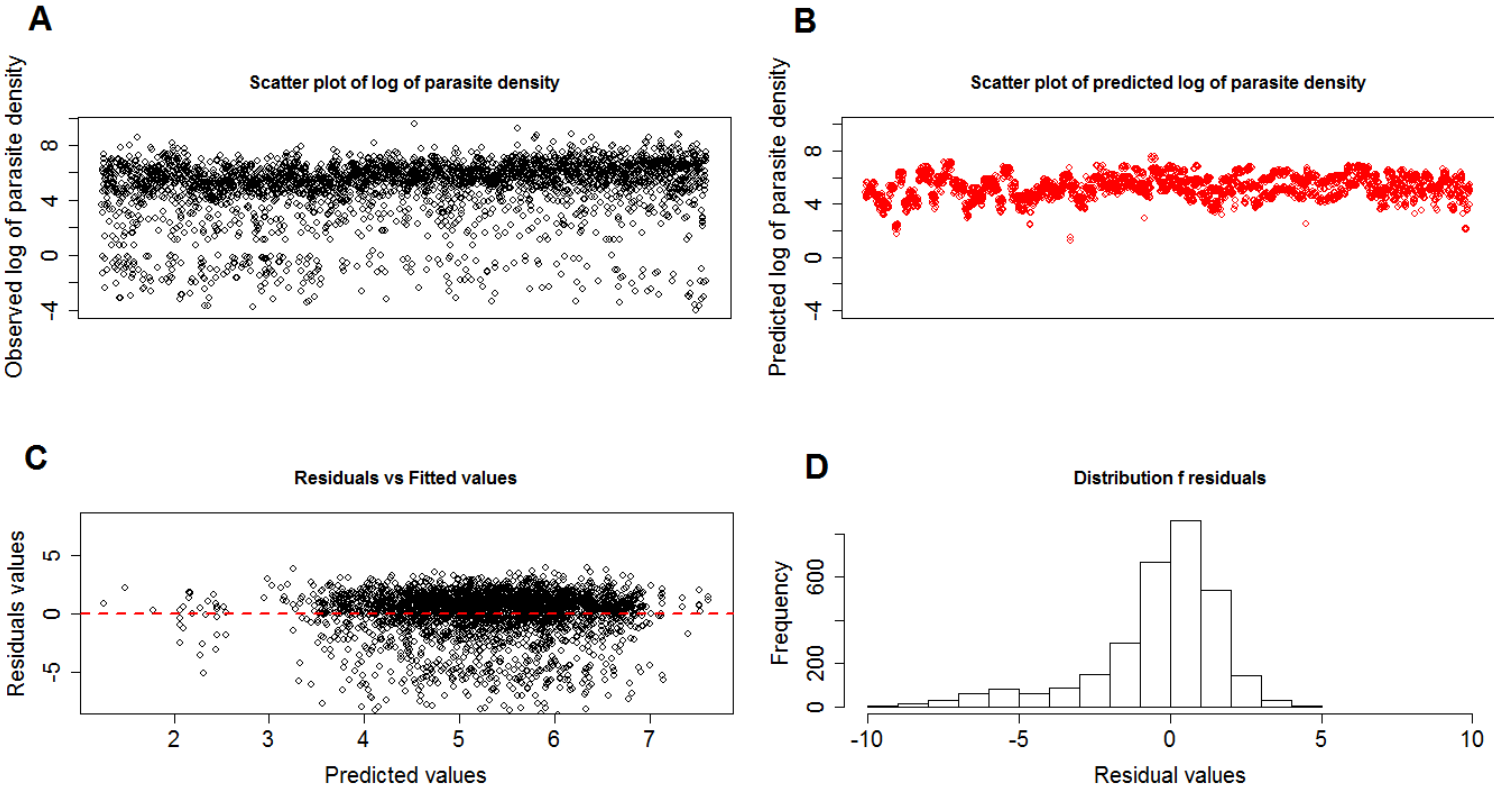

### Analysis using box-cox transformation and probit normalization

The model we fitted on the parasite density ("*pf\_density*") has used as outcome variable the natural logarithm of *pf\_density* (equivalent to a Box-Cox for which the parameter is null). As shown on Figure S4 the distribution of  $\log(pf\_density)$  is not perfectly normal, it is left-skewed.

**Figure S4. Histogram of *pf\_density* and  $\log(pf\_density)$**

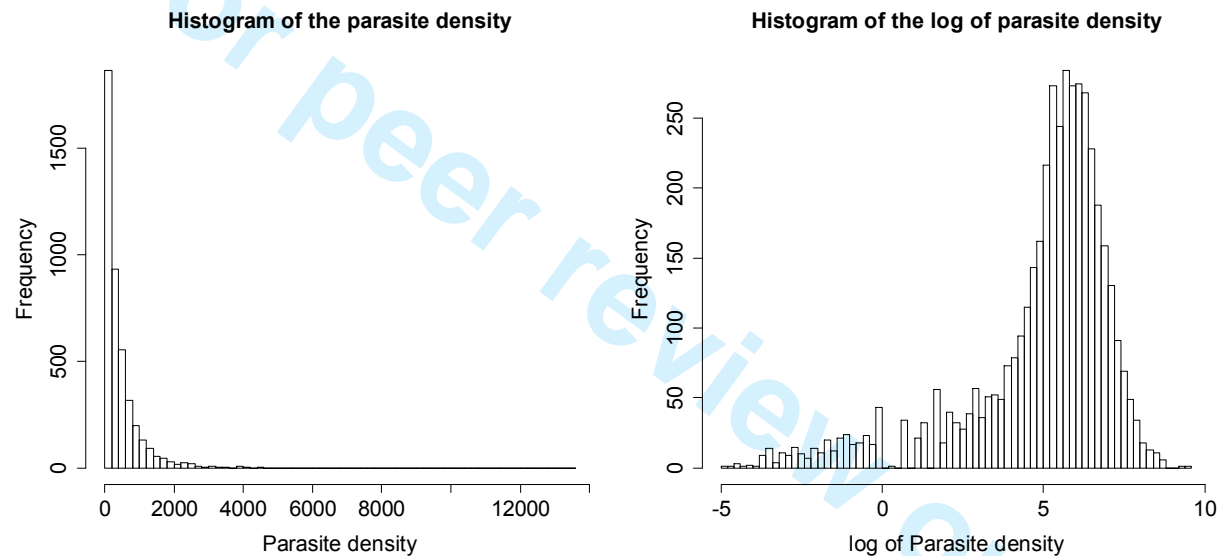

We add here the case for a Box-Cox transformation of the parasite density where the parameter is  $\lambda = 0.3$ , this parameter value was obtained as optimal using the R- function named "boxcox" from the "MASS" library. Then the Box-Cox transformation of the parasite density is  $y = (pf\_density^{0.3} - 1)/0.3$  having the distribution shown on Figure S5 below.

Figure S5. Histogram of the Box-Cox transformation of pf\_density using a  $\lambda$  parameter of 0.3

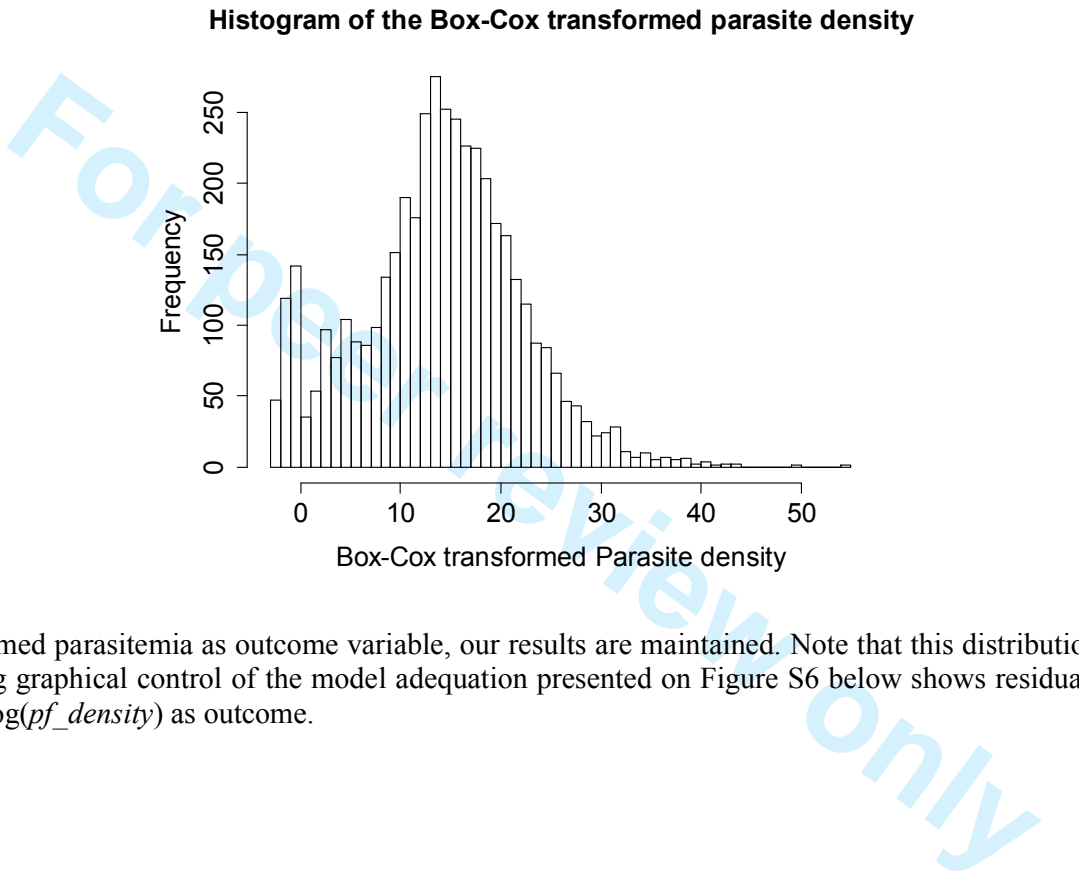

With this Box-Cox transformed parasitemia as outcome variable, our results are maintained. Note that this distribution is not "perfectly" normal. However, the corresponding graphical control of the model adequation presented on Figure S6 below shows residuals more close to the normal distribution than those for  $\log(pf\_density)$  as outcome.

Figure S6. Graphical control of the model adequation for  $y = \text{Box-Cox}(pf\_density, \lambda = 0.3)$

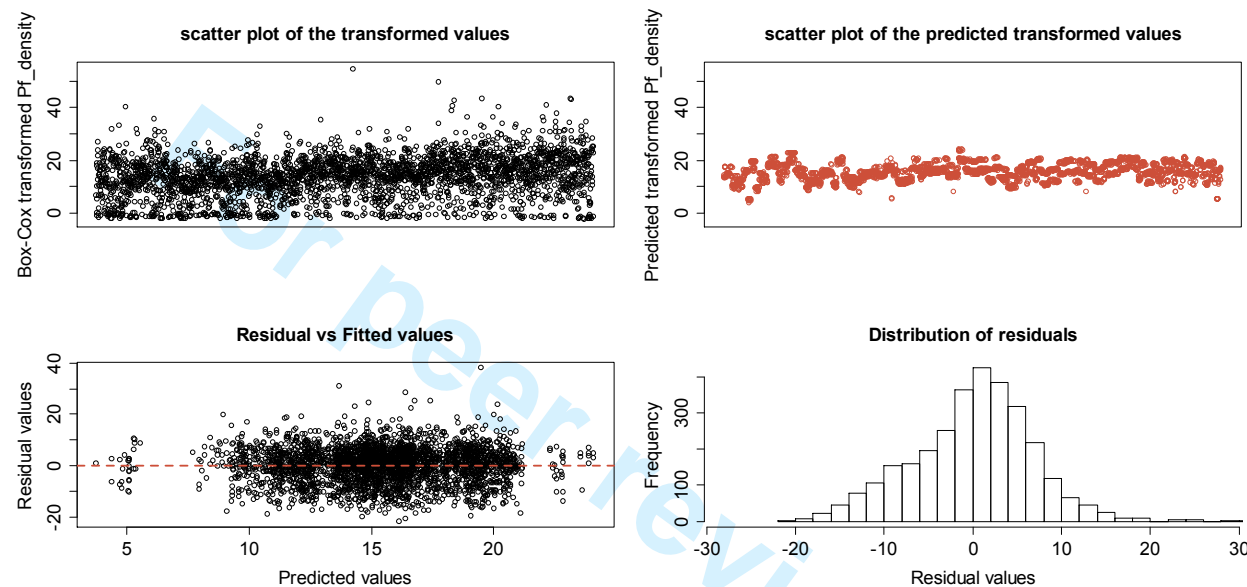

Although using a mixed model approach based on an extreme value distribution would provide a more robust validation of these results, the method we used incorporating pedigree information was developed through an R-package known as "pedigreemm" that allows just for a limited number of distribution laws, which do not include extreme value distributions like the Gumbel or Weibull distributions.

However, we tried the Probit normalization on the  $\log(pf\_density)$  to readjust its quantiles to those from a standard normal, and subsequently used the derived standard normal transformation of the  $\log(pf\_density)$  as outcome (see Figure S7 below, the three graphs presented in the first row of the graphs panel concern the  $\log(pf\_density)$  before Probit normalization and the three in the second row are for after Probit normalization. We can see on the histogram in blue color a good normal distribution of the  $y$  variable.

Figure S7. Probit normalization of the  $\log(pf\_density)$

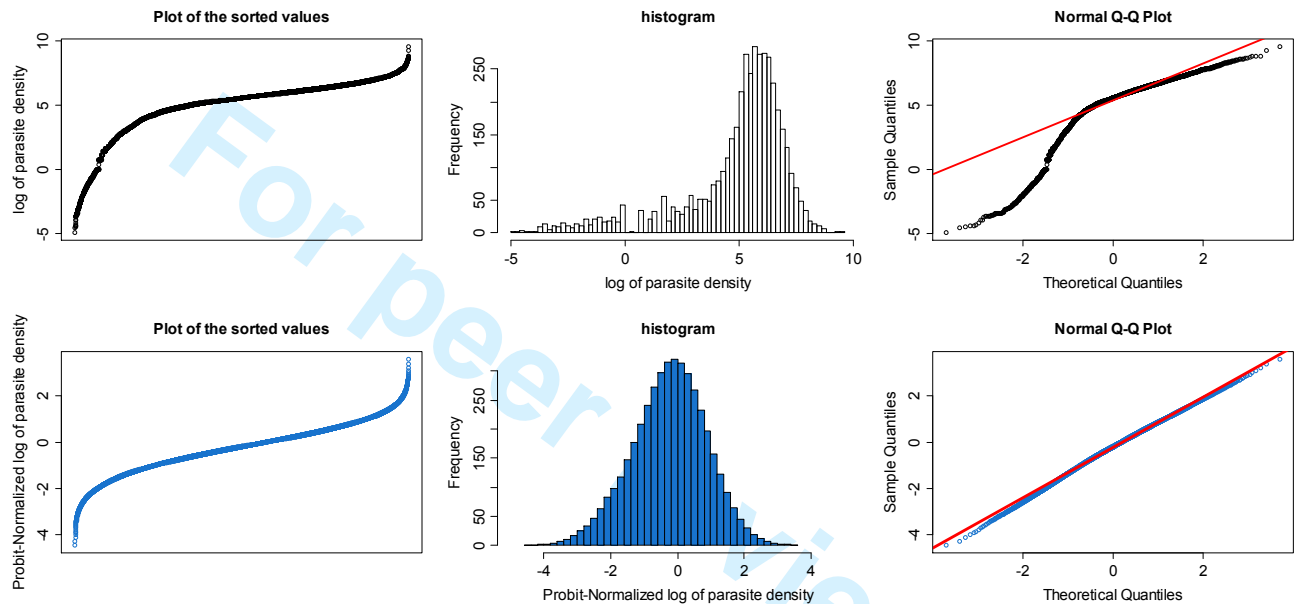

The results we obtained after this Probit normalization of the  $\log(pf\_density)$  confirmed the same findings. Also, the corresponding graphical control of the model adequation presented on Figure S8 below, shows a good normal distribution of residuals from this model.

Figure S8. Graphical control of the model adequation after Probit normalization of the  $\log(pf\_density)$

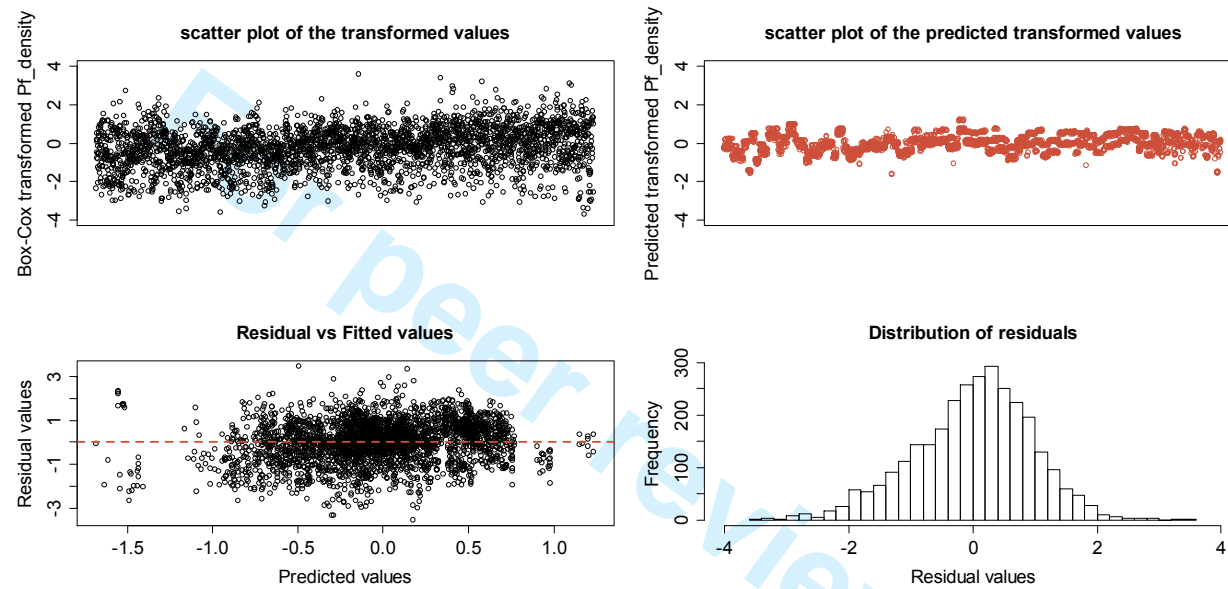

1  
2  
3  
4  
5  
6  
7  
8  
9  
10  
11  
12  
13  
14  
15  
16  
17  
18  
19  
20  
21  
22  
23  
24  
25  
26  
27  
28  
29  
30  
31  
32  
33  
34  
35  
36  
37  
38  
39  
40  
41  
42  
43  
44  
45  
46  
47  
48  
49  
50  
51  
52  
53  
54  
55  
56  
57  
58  
59  
60

**Asthma and atopic dermatitis are associated with increased risk of clinical *Plasmodium falciparum* malaria**

Magali Herrant<sup>1,2</sup> *scientist*, Cheikh Loucoubar<sup>1,2,3,4</sup> *scientist*, Hubert Bassène<sup>5</sup> *scientist*, Bronner Gonçalves<sup>2</sup> MD, Sabah Boufkhed<sup>2</sup> *scientist*, Fatoumata Diene Sarr<sup>2</sup> MD, Arnaud Fontanet<sup>6,7</sup> MD, Adama Tall<sup>2</sup> *scientist*, Laurence Baril<sup>2</sup> MD, Odile Mercereau-Puijalon<sup>8</sup> *scientist*, Salaheddine Mécheri<sup>9</sup> *scientist*, Anavaj Sakuntabhai<sup>1,10</sup> *scientist*, Richard Paul<sup>1</sup> *scientist*

<sup>1</sup> Institut Pasteur, Unité de la Génétique Fonctionnelle des Maladies Infectieuses, CNRS URA3012, 28 rue du Docteur Roux, F-75724, Paris cedex 15, France.

<sup>2</sup> Institut Pasteur de Dakar, Unité d'Epidémiologie des Maladies Infectieuses, Dakar, Senegal.

<sup>3</sup> INSERM, U946, Genetic Variation and Human Diseases Unit, F-75010, Paris, France.

<sup>4</sup> Université Paris Diderot, Sorbonne Paris Cité, Institut Universitaire d'Hématologie, F-75010, Paris, France.

<sup>5</sup> Institut de Recherche pour le Développement (IRD), Unité de Recherche sur les Maladies Infectieuses et Tropicales Emergentes, URMITE CNRS-IRD 198 UMR 6236, Dakar, Sénégal

<sup>6</sup> Institut Pasteur, Unité d'Epidémiologie des Maladies Emergentes, 25 rue du Docteur Roux, F-75724, Paris cedex 15, France.

<sup>7</sup> Conservatoire National des Arts et Métiers, 292 rue Saint Martin, Paris 75003, France

<sup>8</sup> Institut Pasteur, Unité d'Immunologie Moléculaire des Parasites, CNRS URA2581, Paris, France.

<sup>9</sup> Institut Pasteur, Unité de Biologie des Interactions Hôte Parasite, 25 rue du Docteur Roux, F-75724, Paris cedex 15, France.

<sup>10</sup> Complex Systems group, Faculty of Science, Mahidol University, Bangkok, Thailand.

**Correspondance to:** Richard Paul, Institut Pasteur, Unité de la Génétique Fonctionnelle des Maladies Infectieuses, 28 rue du Docteur Roux, 75724 Paris cedex 15, France. richard.paul@pasteur.fr

## Article summary

### Article focus

- Genetic studies suggest a link between susceptibility to allergy and malaria in Africa
- We hypothesize that atopy increases susceptibility to malaria

### Key messages

- Results demonstrate an association between asthma, atopic dermatitis and susceptibility to clinical *P. falciparum* episodes.
- Genetic pre-disposition to asthma or atopic dermatitis impairs the acquisition of clinical immunity to malaria.
- Administration of anti-histamines to atopic children will likely reduce the burden of clinical malaria in these children, increase the efficacy of first-line treatment anti-malarials and alleviate the non-infectious consequences of atopy.

### Strengths and limitations

The major strength of this study is the complete knowledge of the number of clinical *P. falciparum* malaria episodes each individual has had since birth and the exposure level per trimester over the 15 years covering the birth cohort. No other study has such detailed information for such a length of time. The major weakness of the study is the relatively small sample size, which would have reduced power to detect an association.

1  
2  
3  
4  
5  
6  
7  
8  
9  
10  
11  
12  
13  
14  
15  
16  
17  
18  
19  
20  
21  
22  
23  
24  
25  
26  
27  
28  
29  
30  
31  
32  
33  
34  
35  
36  
37  
38  
39  
40  
41  
42  
43  
44  
45  
46  
47  
48  
49  
50  
51  
52  
53  
54  
55  
56  
57  
58  
59  
60

**Abstract**

**Objectives:** To assess the impact of atopy and allergy on the risk of clinical malaria.

**Design:** A clinical and immunological allergy cross-sectional survey in a birth cohort of 175 children from 1 month to 14 years of age followed for up to 15 years in a longitudinal open cohort study of malaria in Senegal. Malaria incidence data were available for 143 of these children (aged 4 months to 14 years of age) for up to 15 years. Mixed model regression analysis was used to determine the impact of allergy status on malaria incidence, adjusting for age, gender, sickle cell trait and force of infection.

**Main outcome measures:** Asthma, allergic rhinoconjunctivitis and atopic dermatitis status, the number of clinical *Plasmodium falciparum* malaria episodes since birth and associated parasite density.

**Results:** Twelve percent of the children were classified as asthmatic and ten percent as having atopic dermatitis. These groups had respectively a two-fold (OR 2.12 95% confidence intervals 1.46 to 3.08;  $P=8 \times 10^{-5}$ ) and three-fold (OR 3.15, 1.56 to 6.33;  $P=1.3 \times 10^{-3}$ ) increase in the risk of clinical *P. falciparum* malaria once older than the age of peak incidence of clinical malaria (3 to 4 years of age). They also presented with higher *P. falciparum* parasite densities (Asthma: mean 105.3 parasites/ $\mu$ L  $\pm$ SE 41.0 vs. 51.3  $\pm$ 9.7;  $P=6.2 \times 10^{-3}$ ; Atopic dermatitis: 135.4  $\pm$ 70.7 vs. 52.3  $\pm$ 11.0;  $P=0.014$ ). There was no effect of allergy on the number of non-malaria clinical presentations. Individuals with allergic rhinoconjunctivitis did not have an increased risk of clinical malaria nor any difference in parasite densities.

**Conclusion:** These results demonstrate that asthma and atopic dermatitis delay the development of clinical immunity to *P. falciparum*. Despite the encouraging decrease in malaria incidence rates in Africa, a significant concern is the extent to which the increase in allergy will exacerbate the burden of malaria. Given the demonstrated anti-parasitic effect of anti-histamines, administration to atopic children will likely reduce the burden of clinical malaria in these children, increase the efficacy of first-line treatment anti-malarials and alleviate the non-infectious consequences of atopy.

## Introduction

The World Allergy Organization estimates that 40% of the world's population is concerned by allergic diseases.<sup>1</sup> In developing countries where *Plasmodium falciparum* malaria is endemic, prevalence of allergy is significantly lower, but is on the increase.<sup>2</sup> T helper type 2 (Th2) cells, their related cytokines, IgE, eosinophils and mast cells play a major role in allergic inflammation. Orientation of the immune response towards a Th1 profile is crucial for immunity to intracellular pathogens,<sup>3</sup> whereas orientation towards a Th2 profile drives immunity to extracellular pathogens and antigens resulting in class switching giving rise to IgE-producing B cells.<sup>4</sup> ~~An important role of the Th1/Th2 balance in the development of clinical malaria following infection by *P. falciparum* has been suggested by numerous studies.<sup>5-7</sup> Whilst it is recognised that acquired anti-parasite immunity is IgG dependent,<sup>8</sup> it has been suggested that the Th2 bias induced by *P. falciparum* may exacerbate allergy parasite-specific IgE also impact upon the clinical outcome of infection.<sup>8</sup> For example, higher IgE but not IgG levels have been observed in patients with cerebral malaria than those with uncomplicated *P. falciparum* infection.<sup>9</sup> The role of IgE, however, remains unclear.<sup>10</sup> Likewise, an atopic state may generate a tendency to develop a Th2-type immune response to *P. falciparum*.~~

~~However,~~ the interplay between infectious agents and allergy is ~~unclear~~ambiguous. On the one hand, for example, severe respiratory syncytial virus infection in infants increased the risk of allergic rhinoconjunctivitis and allergic asthma.<sup>119,120</sup> On the other hand, measles,<sup>134</sup> hepatitis A<sup>142</sup> and tuberculosis<sup>153</sup> seemingly reduce atopy. Although, an atopic condition can increase incidence of disease, such as the case for the skin commensal *Staphylococcus aureus* in patients with atopic dermatitis,<sup>164</sup> an atopic tendency *per se* does not generally lead to increased illness from infectious agents.

Genome wide studies have identified chromosomal regions linked to clinical malaria, all of which overlap with those previously identified to be involved in atopic dermatitis, asthma, atopy and IgE levels,<sup>175-197</sup> suggesting that common mechanisms may be involved in both pathologies.<sup>2048</sup> Chromosomal region 5q31 that has been repeatedly shown to be associated with control of parasite density and contains a cluster of cytokines, among which IL12B has been previously associated with psoriasis.<sup>2149</sup> The other regions, 13q13-q22, 5p15-p13 and 12q21-q23, contain genes involved in innate immunity, notably the interleukin 7 receptor,

1  
2  
3  
4  
5  
6  
7  
8  
9  
10  
11  
12  
13  
14  
15  
16  
17  
18  
19  
20  
21  
22  
23  
24  
25  
26  
27  
28  
29  
30  
31  
32  
33  
34  
35  
36  
37  
38  
39  
40  
41  
42  
43  
44  
45  
46  
47  
48  
49  
50  
51  
52  
53  
54  
55  
56  
57  
58  
59  
60

and several involved in tumour necrosis factor synthesis [C1q and tumour necrosis factor related protein 3 (C1QTNF3)] and a gene involved in the complement system (C9).<sup>2018</sup>

Several additional lines of evidence support the concept that susceptibility to malaria and atopy may be related to similar immunological defects. In Ethiopia, a history of malaria was associated with atopy.<sup>229</sup> A mouse model for human atopic disease was found to be very susceptible to murine malaria and a major locus for atopic disease mapped close to the region controlling parasite density.<sup>231</sup> This region contains several candidate genes that have effects on T-cell function.<sup>231</sup>

Moreover, a direct effect of histamine in the malaria pathogenesis has been found using genetic and pharmacological approaches<sup>242</sup> and increased levels of histamine are associated with the severity of disease in humans infected with *P. falciparum* and in animal malaria models.<sup>253,264</sup>

To test the hypothesis that allergy impacts upon clinical *P. falciparum* malaria, we performed a clinical allergy cross-sectional study in the family-based longitudinal cohort from Senegal previously used for the genome linkage study<sup>2018</sup> and analysed the impact of asthma, atopic dermatitis, allergic rhinoconjunctivitis on the incidence of clinical *P. falciparum* episodes and the maximum parasite density during each episode.

Methods

Population and outcome data

The malaria research program conducted in Dielmo village in Senegal has been ongoing since 1990 as described elsewhere.<sup>275</sup> In brief, between 1990 and 2008, a longitudinal study involving the inhabitants of the village of Dielmo, Senegal, was carried out to identify all episodes of fever. The study design included daily medical surveillance with systematic blood testing of individuals with fever and examination of 200 oil-immersion fields on a thick blood film for malaria parasites (about 0.5 µL of blood). Each individual was given a unique identification code and details of family ties, occupation, and precise place of residence were recorded on detailed maps of each household with the location of each bedroom. All households were visited daily, absenteeism recorded, and the presence of fever or other

symptoms assessed. We systematically recorded body temperature at home three times a week (every second day) in children younger than 5 years, and in older children and adults in cases of suspected fever or fever-related symptoms. In cases of fever or other symptoms, blood testing was done at the dispensary by finger prick, and we provided detailed medical examination and specific treatment. Parasitologically confirmed clinical malaria episodes were treated according to national guidelines. From 1990 to 2008, four different drug regimens were implemented: Quinine from 1990 to 1994, Chloroquine from 1995 to 2003, Fansidar (sulfadoxine-pyrimethamine) from 2004 to mid-2006 and Artemisinin-based combination therapy (ACT; Amodiaquine- sulfadoxine-pyrimethamine) from mid-2006 to 2008.

Parasite positivity was established as follows. Thick blood films were prepared and stained by 3% Giemsa stain. Blood films were examined under an oil immersion objective at x1000 magnification by the trained laboratory technicians and 200 thick film fields were examined to count the number of asexual and gametocyte parasite stages. Asexual parasite densities (per  $\mu\text{L}$ ) were calculated by establishing the ratio of parasites to white blood cells and then multiplying the parasite count by 8,000, the average white blood cell count per  $\mu\text{L}$  of blood.

Malaria transmission in Dielmo is intense and perennial. We conducted a cross-sectional survey to estimate the prevalence of symptoms related to allergic diseases among 175 children aged from 1 month to 14 years old who were born during the malaria research program.

Both the longitudinal and cross-sectional surveys were approved by the Ministry of Health of Senegal. Informed consent of the volunteers is renewed every year. More specifically for the cross-sectional survey, after informing about the procedures and the purpose of the study, written informed consent was obtained from parents or guardians of children either by signature or by thumbprint on a voluntary consent form written in both French and Wolof, the main local language. Consent was obtained in the presence of the school director, an independent witness.

The family structure (pedigree) was available after a demographic census performed for every volunteer at his adhesion in the project. A verbal interview of mothers or key representatives of the household was used to obtain information on genetic relationships between studied individuals, their children, their parents, and to identify genetic links

1  
2  
3  
4  
5  
6  
7  
8  
9  
10  
11  
12  
13  
14  
15  
16  
17  
18  
19  
20  
21  
22  
23  
24  
25  
26  
27  
28  
29  
30  
31  
32  
33  
34  
35  
36  
37  
38  
39  
40  
41  
42  
43  
44  
45  
46  
47  
48  
49  
50  
51  
52  
53  
54  
55  
56  
57  
58  
59  
60

among the population. The total pedigree comprised 828 individuals, including absent or dead relatives, composed of ten independent families that can be sub-divided into 206 nuclear families (father – mother couples with at least one child) with an average of 3.6 children each. Genetically related nuclear families occur because of multiple marriages and marriages among related individuals. Previous typing with microsatellites has enabled the construction of a pedigree based on Identity-by-Descent using MERLIN.<sup>2048,286</sup> The mean coefficient of inbreeding is 0.0008. Newborns since this original genetic analysis were added to the family of the parents in question. The 143 children, with both allergy and malaria data, belonged to 61 nuclear families and comprised 30 singletons, 102 siblings and 11 half-sibs (yielding 55 half-sib pairs). The mean genetic relatedness (by pedigree) of the 143 children is 0.0114 (range: 0.0013 to 0.022).

*P. falciparum clinical episodes*

*P. falciparum* malaria clinical episode phenotypes analysed were: (i) clinical *P. falciparum* infections treated with anti-malarial therapy and (ii) the highest parasite density during the *P. falciparum* clinical episode. A clinical *P. falciparum* episode was defined as a clinical presentation with fever (axillary temperature  $\geq 37.5^{\circ}\text{C}$ ) and/or other clinical signs suggestive of malaria associated with a thick blood smear positive for *P. falciparum* and that was treated with anti-malarial therapy. Repeated clinical malaria presentations within 15 consecutive days were not considered to be independent and were excluded from the analyses, unless there was a negative thick blood smear between two clinical presentations. We also excluded observations in any trimester for which the individual was not present for at least one third of the time.

We calculated the quarterly incidence rate of clinical *P. falciparum* episodes in children below the age of 15 years as the ratio of the total number of clinical *P. falciparum* episodes during the trimester divided by the total number of person-trimesters surveyed. Incidence rate is expressed as cases per 100 person-trimesters (see Supplementary Figure S1). This rate was used in the analysis to approximate the force of infection (exposure level) within the targeted population at the time of a given clinical *P. falciparum* episode.

The total number of clinical presentations per trimester that were not attributable to *P. falciparum* was tabulated. Repeated non-malaria presentations within seven consecutive days were not considered to be independent and were excluded.

### *Allergic diseases and atopic status*

The International Study of Asthma and Allergies in Childhood (ISAAC) diagnostic criteria have been shown to be reproducible, adequate and able to discriminate children with allergic diseases in different areas of the world.<sup>2</sup> The standardized ISAAC questionnaire originally written in English was translated into French in compliance with ISAAC guidelines<sup>297</sup>, adapting it to the usual local customs following advice from local clinicians and paediatric allergologists (Acknowledgements and Technical Appendix). The adequacy and reliability of the translated questionnaire had been previously confirmed by a pilot study on 30 randomly selected children in the same community. The questionnaire was completed by specially trained health workers during an oral interview conducted in Wolof with children and their mothers or guardians.

To assess the prevalence of allergic diseases in children, we used the positive and negative predictive values of the ISAAC questionnaire diagnosis criteria developed for subtropical countries.<sup>3028</sup> Each question was scored according to the medical diagnosis of paediatricians and paediatric allergologists. Positive or negative answers were thus graded on the basis of symptom sensitivity, specificity, frequency, location or early onset. For each allergic disease, three categories of symptom severity, *severe*, *moderate*, and *none*, were defined as follows:

*Asthma* – *severe* symptoms if the child had “wheezing or whistling in the chest before the age of two years” and “more than three times” or severe enough to “limit his/her speech”; *moderate* symptoms if the child had “wheezing or whistling in the chest before the age of two years” and “in the past 12 months”; and *none* otherwise.

*Allergic rhinoconjunctivitis* – *severe* symptoms if the child had “sneezing, runny or stuffy nose in the past 12 months” and “more than five times a year”, and “itchy, watery eyes or tropical endemic limboconjunctivitis (TELC) in the past 12 months”; *moderate* symptoms if the child had “sneezing, runny or stuffy nose in the past 12 months”, and “itchy, watery eyes or TELC in the past 12 months”; and *none* otherwise.

*Atopic dermatitis* – *severe* symptoms if the child had “scaly or exudating, crusted and pruritic patches in the past 12 months” and “affecting any of the following characteristic areas: face, around the ears or eyes, folds of armpits or elbows or groin, behind the knees, under the buttocks”, and “onset of symptoms before the age of two years”; *moderate* symptoms if the

1  
2  
3  
4  
5  
6  
7  
8  
9  
10  
11  
12  
13  
14  
15  
16  
17  
18  
19  
20  
21  
22  
23  
24  
25  
26  
27  
28  
29  
30  
31  
32  
33  
34  
35  
36  
37  
38  
39  
40  
41  
42  
43  
44  
45  
46  
47  
48  
49  
50  
51  
52  
53  
54  
55  
56  
57  
58  
59  
60

child had “scaly or exudating, crusted and pruritic patches in the past 12 months” and “affecting any of characteristic areas (see above)”, and “onset of symptoms before the age of four years”; and *none* otherwise.

The inter-relationships between variables reflecting the severity of symptoms of the three allergic diseases were used to identify children at high risk of atopy. The *high probability* group was defined by the prevalence of at least one of any *severe* symptoms or two of any *moderate* symptoms. The *probable* group was defined as those with *moderate* symptoms from one of the three allergic diseases and remaining children were classified in the *unlikely* group.

*Helminths*

Helminthic infections are common in this region and are known to modify the clinical course and outcome of both allergic diseases and malaria.<sup>3129,320</sup> We therefore carried out a helminth survey for 91 individuals present during the cross-sectional survey. Diagnosis was performed by stool examination by microscope and by the Kato technique to search for the presence of *Ascaris lumbricoides*, hookworms (*Ancylostoma duodenale* and *Necator americanus*), whipworm (*Trichuris trichiuria*), *Schistosoma mansoni*, and *Strongyloides stercoralis*. Examination for pinworms (*Enterobius vermicularis*) was performed by the anal scotch-test. An anti-helminthic treatment was proposed for all infested individuals.

*Immunoglobulin E titres*

Specific IgE titres were measured by ELISA as previously described.<sup>331</sup> A panel of allergens of potential pertinence to the three classes of allergy was used: (i) Salivary gland extracts (SGE) of two mosquito species present in the study cohorts, *Aedes aegypti* and *Anopheles gambiae sensu stricto*, and (ii) *P. falciparum* parasite extract were prepared as previously described<sup>31</sup>; (iii) House dust mite spp. *Dermatophagoides farinae* and *Dermatophagoides pteronyssinus*; (iv) a mix of pollen allergens from five ubiquitous gramineae spp. [Cock’s-foot (*Dactylis glomerata*), Timothy grass (*Phleum pratense*), Sweet Vernal grass (*Anthoxanthum odoratum*), Perennial ryegrass (*Lolium perenne*), Kentucky Bluegrass (*Poa pratensis*)] (all from Stallergenes, France).

**Statistical analysis**

Statistical analyses were performed using R version 2.12.0 (The R Foundation for Statistical Computing, Vienna, Austria). To address the effect of allergic status on the risk of clinical *P. falciparum* episodes, we performed Generalized Linear Mixed Models (GLMM) extended to pedigree data using the *pedigreemm* package for R to account for the non-independence of individuals because of family relationships, shared house and for repeated measures from the same individual (Technical Appendix). Correlated individual effects due to familial relationships were taken into account by using the pedigree-based genetic relatedness matrix that contains the genetic covariance among all pairs of individuals in the study cohort and is calculated using the pedigree information.<sup>342</sup> Shared house and repeated measures from the same individual were modelled as random effects. All random effects were assumed to be normally distributed, and conditional on these random effects, the dependent variable had: (i) a Binomial distribution when the studied phenotype was the occurrence of a clinical *P. falciparum* episode treated with anti-malarial therapy during a trimester, (ii) a Gaussian distribution when the studied phenotype was the logarithm of the maximum parasite density during a given clinical *P. falciparum* episode, and (iii) a Poisson distribution when the studied phenotype was the number of non-malaria episodes per trimester. The effects of allergy disease classes on these dependent variables were modelled as fixed effects. Allergy classes were reduced to two levels, *Severe* or *moderate* vs. *none* for analyses of asthma, atopic dermatitis and allergic rhinoconjunctivitis and *high probability* vs. *probable* and *unlikely* for atopic tendency. Co-variables included sickle cell trait<sup>331</sup>, gender, number of days present on site during the trimester, trimestrial incidence of *P. falciparum* and age. Age was initially analysed as a continuous covariate. To assess the age-specific effect of allergy, age was categorised into two levels (<3.5 years of age and ≥3.5 years of age, based on the age of peak clinical incidence) and allergy class was nested within age class. The age threshold was varied from 1.5 years to 5.5 years of age and the data re-analysed to assess at which age there was the strongest effect. The association of allergy classes with IgE levels was analysed by box-cox transforming the data and fitting a GLMM with a normal distribution.

## Results

1  
2  
3  
4  
5  
6  
7  
8  
9  
10  
11  
12  
13  
14  
15  
16  
17  
18  
19  
20  
21  
22  
23  
24  
25  
26  
27  
28  
29  
30  
31  
32  
33  
34  
35  
36  
37  
38  
39  
40  
41  
42  
43  
44  
45  
46  
47  
48  
49  
50  
51  
52  
53  
54  
55  
56  
57  
58  
59  
60

Of the 205 eligible children aged under 15 years involved in the family-based longitudinal study, 175 (85.4 %) participated in the cross-sectional survey to assess the prevalence of related symptoms of allergic diseases. All eligible children present at the time of the survey were included; no explicit refusal to participate was recorded. The study cohort was aged from 1 month to 14 years 11 months. The sex-ratio (male/female) was 0.94.

From 1994 until 2008, 143 of the children participating in the cross-sectional survey were present for at least 31 days in any trimester during the study period generating a total of 3,093 person-trimesters of presence (Supplementary Table S1). There were 2,065 treated *P. falciparum* clinical episodes (per individual: median 11, range 0-47)(Supplementary Table S2). The age peak of incidence of *P. falciparum* episodes occurred at 3 to 4 years of age (Figure 1). There were 1,868 non-malaria episodes (median 12, range 0-37) (Table S2). These non-malaria clinical presentations were associated with headache (38 %), chills (32 %), cough (13 %), vomiting (11 %) and diarrhoea (6 %).

The prevalence of moderate or severe asthma symptoms was respectively 2.3 % and 10.3 % (Table 1). The prevalence of moderate or severe allergic rhinoconjunctivitis symptoms was respectively 6.3 % and 10.3 %. The prevalence of moderate or severe atopic dermatitis symptoms was respectively 6.3 % and 2.9 %. On the basis of symptom severity, an atopic tendency was estimated to be unlikely for 68.0 %, probable for 9.1 % and highly probable for 22.9 % of the 175 children. The frequency of each allergy class in children for whom malaria data were available is shown in Table S1.

The risk of treated clinical *P. falciparum* infections was higher for children with high probability of atopy (OR 1.65, 95% confidence intervals 1.20 to 2.26; P=0.002) (Table 2), after adjusting for age, sickle cell trait and the exposure level. Gender was not found to be significant. Analysing the impact of atopy in children younger and older than the peak age of clinical incidence (3 to 4 years old), revealed that atopy increased the risk of *P. falciparum* episodes in children at an age greater than 3.5 years (OR 2.02, 1.39 to 2.93; P=2x10<sup>-4</sup>), but not in children of age prior to the peak clinical incidence (OR 1.38, 0.92 to 2.08; P=0.124) (Table 2). This increased risk resulted in an ever increasing cumulative number of *P. falciparum* episodes with age beyond that of peak clinical incidence (Figure 2. See supplementary Figure S2 for model predictions for comparison).

Analysis by allergy category revealed that asthma (severe or moderate) increases the risk of *P. falciparum* episodes (OR 2.12, 1.46 to 3.08;  $P=8 \times 10^{-5}$ ) and this again only in children of age greater than 3.5 years old (OR 2.33, 1.50 to 3.61;  $P=1.5 \times 10^{-4}$ ). Atopic dermatitis increased the risk of clinical malaria in children older (OR 3.15, 1.56 to 6.33;  $P=1.3 \times 10^{-3}$ ) but not younger than 3.5 years of age (Table 2). Allergic rhinoconjunctivitis was not associated with increased risk of clinical malaria at any age (Table 2). The impact of atopy, asthma and atopic dermatitis can be clearly seen in the ever-increasing number of cumulative *P. falciparum* episodes beyond the age of the onset of clinical immunity in the population, 3.5 years of age (Figure 2). There is no difference in the number of clinical malaria episodes prior to this age in individuals with or without an allergic condition. Analysis using different age thresholds (from 1.5 to 5.5 years of age) revealed similar OR for thresholds of 2.5, 3.5 and 4.5 years of age. The maximum OR for increased malaria occurred in children older than 4.5 years of age and with atopy or atopic dermatitis, whereas for the asthma group it occurred in children after 3.5 years of age (Supplementary Table S3).

There was no impact of any allergic disease on the number of non-malaria episodes by trimester (Supplementary Table S4).

The impact of atopy, asthma and atopic dermatitis on the maximum *P. falciparum* parasite density during a given clinical malaria episode mirrored that of the risk of *P. falciparum* episodes. Parasite density was significantly higher for children with allergic disease older than 3.5 years of age (Table 3 and supplementary Figure S3 for residuals of the fitted model).

As the log-transformed data were left skewed, we additionally analysed using box-cox transformation and probit normalization of the data. The results were qualitatively the same (Supplementary text and Figures S4-S8). Allergic rhinoconjunctivitis had no impact on the parasite density (Table 3). Analysis using different age thresholds yielded ~~the same pattern~~similar qualitative conclusions as seen with the number of clinical episodes (Table S3).

Individuals with moderate or severe symptoms of atopic dermatitis had significantly higher specific IgE titres against *Ae. aegypti* ( $P=0.004$ ) and *An. gambiae* SGE ( $P<0.001$ ). There were no detectable specific anti-*P. falciparum* IgE. Individuals with moderate or severe symptoms of allergic rhinoconjunctivitis did not have significantly higher IgE titres against the tested graminiae ( $P=0.28$ ), although titres decreased with age ( $P=0.035$ ). There was also no effect of

1  
2  
3  
4  
5  
6  
7  
8  
9  
10  
11  
12  
13  
14  
15  
16  
17  
18  
19  
20  
21  
22  
23  
24  
25  
26  
27  
28  
29  
30  
31  
32  
33  
34  
35  
36  
37  
38  
39  
40  
41  
42  
43  
44  
45  
46  
47  
48  
49  
50  
51  
52  
53  
54  
55  
56  
57  
58  
59  
60

asthma on IgE titres against the house dust mite spp. tested (*D. farinae* P=0.60 & *D. pteronyssinus* P=0.27).

Only five individuals were infested with helminths (two *Ancylostoma*, one *Strongyloides*, one *Trichuris* and one *Enterobius*).

**Discussion**

**Principal findings**

Establishing the allergic status of children up to the age of 15 years old followed for malaria since birth, revealed an association of asthma and atopic dermatitis with susceptibility to clinical *P. falciparum* episodes. Importantly the increase in risk of malaria associated with these allergic conditions occurred after the peak clinical incidence of disease in the population, suggesting that they delay the development of clinical immunity to malaria.

**Strengths and weaknesses of the study**

The major strength of this study is the complete knowledge of the number of clinical *P. falciparum* malaria episodes each individual has had since birth and the exposure level per trimester over the 15 years covering the birth cohort. No other study has such detailed information for such a length of time. The major weakness of the study is the relatively small sample size, which would have reduced power to detect an association. In addition, although allergy diagnosis for children under 2 years of age is not considered reliable, there were only 15 individuals under 2 at the time of the allergy study of the 143 for whom malaria and allergy data were available.

**Meaning of the study**

Under intense malaria transmission, after repeated exposure to the parasite, children develop a clinical immunity<sup>353</sup>, whereby they tolerate elevated parasite densities without showing clinical symptoms. In this cohort, the population mean onset of clinical immunity occurred at 3 to 4 years of age. Although clinical immunity is accompanied by a reduction in parasite density, effective anti-parasite immunity develops much more slowly<sup>364</sup> with individuals achieving a state of premunition, whereby they maintain low-grade parasite densities in an asymptomatic state.<sup>375</sup> We show here that children with clinically defined

asthma or atopic dermatitis ~~had a two to three fold~~ have an increased ~~in the~~ risk of presenting with *P. falciparum* malaria episodes requiring treatment once passing the age of peak clinical incidence. They also had higher parasite density during clinical episodes, suggesting a reduced ability to control parasite replication. The observed increase in clinical incidence of malaria in patients with asthma or atopic dermatitis is not likely to be the result of increased frailty of such individuals; these individuals did not come more frequently to the clinic with non-malaria symptoms. Our previous genome linkage study identifying chromosomal regions<sup>2018</sup> associated with malaria that overlap with those previously shown to be linked to asthma/atopy suggests that there may be a shared genetic basis to these pathologies rather than any causative effect of one on the other. This is consistent with the increased susceptibility to malaria of mouse atopic models.<sup>231</sup>

#### Comparison with other studies

A previous study in Ethiopia (East Africa) found that a history of malaria (yes/no) increased risk of atopic dermatitis in 306 cases compared to 426 controls as characterized using the ISAAC questionnaire.<sup>220</sup> The only other epidemiological study that has previously examined the link between malaria and atopy<sup>386</sup> also interpreted the result from the perspective of the impact of malaria on atopy. They examined the re-infection rate with *P. falciparum* over a 5-year period in 91 children that were subsequently classified as atopic or not using skin prick tests (SPT) with house dust mite antigen. Their conclusion was that, as with measles<sup>134</sup> and tuberculosis<sup>153</sup>, malaria infection reduces atopy. However, the study lacked previous infection data since birth of the participating individuals and focussed on atopy as determined by SPT against a single allergen. The case-control study of atopic dermatitis risk factors cited above found no overall association between allergen skin sensitization and atopic dermatitis. We also found no evidence of increased IgE titres against house dust mites in the asthmatic or atopic dermatitis groups or against grass pollen in individuals with allergic rhinoconjunctivitis. Such differences likely reflect the different IgE reactivity profiles due to differences in allergen exposure in Africa.<sup>397</sup> There was no evidence of anti-parasite IgE in this cohort of children. We previously showed that circulating anti-parasite IgE titres were strongly positively correlated with anti-mosquito saliva IgE, but became undetectable following malaria exposure, potentially being bound to effector cells.<sup>331</sup> Only mosquito

1  
2  
3  
4  
5  
6  
7  
8  
9  
10  
11  
12  
13  
14  
15  
16  
17  
18  
19  
20  
21  
22  
23  
24  
25  
26  
27  
28  
29  
30  
31  
32  
33  
34  
35  
36  
37  
38  
39  
40  
41  
42  
43  
44  
45  
46  
47  
48  
49  
50  
51  
52  
53  
54  
55  
56  
57  
58  
59  
60

saliva, a known major local allergen, induced a specific IgE response at significantly higher titres in individuals with atopic dermatitis.

Although the immune effectors of clinical immunity are still poorly defined, there is strong evidence that acquired anti-parasite immunity is IgG-dependent<sup>38</sup> and cytophilic immunoglobulins (IgG1 & IgG3), which are capable of eliminating the parasites by opsonisation and/or by Antibody Dependent Cellular Immunity play an important role in premunition.<sup>375</sup> The higher parasite density during symptomatic episodes observed in the asthma group suggests impaired development of acquired immunity. Impaired acquisition of immunity to malaria in children with asthma or atopic dermatitis may stem from their imbalanced Th1/Th2 response. Indeed, an atopic state may generate a tendency to develop a Th2 type immune response to *P. falciparum*. Dendritic cells that are oriented to a Th2 phenotype are more susceptible to orient the acquired immune response towards a Th2 profile.<sup>4039</sup> Orientation of the immune response towards a Th2 profile by asthma or atopic dermatitis would result in a poor Th1 response (and hence development of protective IgG immunoglobulins), considered to be the dominant arm of the immune response enabling resistance to infectious disease in children.<sup>419</sup>

Many studies have revealed an important role of histamine, a key downstream effector molecule in allergic reaction, in the outcome of a malaria parasite infection.<sup>242-264,421-454</sup> Moreover, reports indicate that components of the innate immune system, including eosinophils, basophils, and mast cells (MCs), could play important roles in the pathogenesis of malaria.<sup>421</sup> Increased levels of histamine in plasma and tissue, derived from basophils and MCs, notably following stimulation by IgE through the high affinity receptor FcεR1, are associated with the severity of disease in humans infected with *P. falciparum* and in animal malaria models.<sup>253,264</sup> Chlorpheniramine, a H1agonist reversed resistance to chloroquine and amodiaquine both *in vivo* and *in vitro*.<sup>432</sup> Moreover, astemizole, another H1 agonist, was identified as an anti-malarial agent in a clinical drug library screen.<sup>443</sup> Finally, *P. falciparum* produces translationally controlled tumor protein, which is a homolog of the mammalian histamine-releasing factor that causes histamine release from human basophils.<sup>454</sup>

**Further research**

Our results provide the first birth cohort study addressing the link between malaria and allergic diseases. They contribute to a growing body of evidence that the pathologies are related. ISAAC has revealed a steady but significant increase in prevalence rates of asthma and allergic diseases in Africa. Whilst the majority of studies have focused on large cities, there is increasing urbanization throughout Africa, as well as improved access to primary health care in many areas. A key concern for ISAAC is the extent to which such societal evolution will result in an increase in allergic diseases. Increased urbanization in sub-Saharan Africa is changing the epidemiology of malaria and although resulting in a decrease in risk, will result in more severe clinical malaria in older individuals.<sup>465,476</sup> Moreover, a large consumption of anti-malarial drugs in the urban areas provides substantial drug pressure fostering the selection of drug-resistant parasites. Despite the encouraging recent decrease in malaria incidence rates, even in rural areas, an additional significant concern is the extent to which such an increase in allergy will exacerbate the burden of malaria. Given the demonstrated anti-parasitic effect of anti-histamines<sup>47,48</sup>, administration of anti-histamines to atopic children will likely reduce the burden of clinical malaria in these children, increase the efficacy of first-line treatment anti-malarials<sup>498</sup> and alleviate the non-infectious consequences of atopy. Clinical intervention studies should be envisaged.

Formatted: Superscript

### What is already known on this topic

There are several reports of the beneficial effects of anti-histamines for malaria chemoprophylaxis<sup>242-264,487</sup> as well as our previous work<sup>2018</sup> showing that chromosomal regions associated with malaria are also linked to allergy and atopy.<sup>175-197</sup> There are two epidemiological studies showing opposite effects of malaria on atopy.<sup>229,386</sup>

### What this study adds

Using a longitudinal malaria study birth cohort, we identified an association of asthma and atopic dermatitis with susceptibility to clinical *P. falciparum* episodes. Importantly the increase in risk of malaria associated with these allergic conditions occurred only after the peak clinical incidence of disease in the population, suggesting that they delay the development of clinical immunity to malaria.

1  
2  
3  
4  
5  
6  
7  
8  
9  
10  
11  
12  
13  
14  
15  
16  
17  
18  
19  
20  
21  
22  
23  
24  
25  
26  
27  
28  
29  
30  
31  
32  
33  
34  
35  
36  
37  
38  
39  
40  
41  
42  
43  
44  
45  
46  
47  
48  
49  
50  
51  
52  
53  
54  
55  
56  
57  
58  
59  
60

We are grateful to the villagers of Dielmo for their participation and sustained collaboration in this project as well as the field workers (Abdoulaye Badiane) and the data manager (Joseph Faye) for their contribution to the project and in generating and maintaining the malaria database. We are indebted to Michel Thiakane, a paediatric allergologist, head of the Paediatric Service, Principal hospital, Dakar, Senegal and Marie-Thérèse Guinnepain, dermatologist, Institut Pasteur clinic, Paris, France for aid in elaborating the ISAAC questionnaire and advising on clinical diagnosis of allergy in Senegal. We specially thank the children and parents or guardians who participated in the cross-sectional survey ‘*Pallergo*’. We thank the International Division of the Institut Pasteur that has given full support to this study.

STROBE: This article has been prepared according to the STROBE checklist guidelines.

Funding: Institut Pasteur de Dakar, Institut Pasteur and Agence Nationale de la Recherche, France (ANR 11- BSV1-027-01). The funding source had no role in study design, data collection, data analysis, data interpretation, or writing of the report. The corresponding author had full access to all the data in the study and had final responsibility for the decision to submit for publication.

Contributors: LB, SM, and RP made substantial contributions to the concept and design of the study. MH, HB, BG, SB, FDS, and AT were involved in acquisition of the data. CL, AF, OMP, AS and RP contributed to the analysis and interpretation of the data. MH, CL, HB, BG, SB, FDS, AF, AT, LB, OMP, SM, AS and RP critically reviewed the report and approved its final version for submission. All authors had full access to all of the data in the study and can take responsibility for the integrity of the data and the accuracy of the data analysis. MH and RP are guarantors.

Competing interests: All authors have completed the ICMJE uniform disclosure form at [www.icmje.org/coi\\_disclosure.pdf](http://www.icmje.org/coi_disclosure.pdf) (available on request from the corresponding author) and declare: no financial relationships with any organisations that might have an interest in the submitted work in the previous three years; no other relationships or activities that could appear to have influenced the submitted work.

Ethical approval: The allergy study was approved by the Senegalese National Ethics committee (2009/N°46). Renewed approval of the longitudinal malaria study was obtained from the same committee (2006/N°969).

Data sharing: The allergy database will be made available on-line. The longitudinal malaria data set will be made available following discussion with the coordinators of the three Institutes that govern the dataset through contact with the corresponding author.

Copyright: The Corresponding Author has the right to grant on behalf of all authors and does grant on behalf of all authors, a worldwide licence to the Publishers and its licensees in perpetuity, in all forms, formats and media (whether known now or created in the future), to i) publish, reproduce, distribute, display and store the Contribution, ii) translate the Contribution into other languages, create adaptations, reprints, include within collections and create summaries, extracts and/or, abstracts of the Contribution, iii) create any other derivative work(s) based on the Contribution, iv) to exploit all subsidiary rights in the Contribution, v) the inclusion of electronic links from the Contribution to third party material where-ever it may be located; and, vi) licence any third party to do any or all of the above.

## References

1. WAO, World Allergy Organization - <http://www.worldallergy.org/index.php>. 2010.
2. Asher MI, Montefort S, Björkstén B, Lai CK, Strachan DP, Weiland SK, et al. Worldwide time trends in the prevalence of symptoms of asthma, allergic rhinoconjunctivitis, and eczema in childhood: ISAAC Phases One and Three repeat multicountry cross-sectional surveys. *Lancet* 2006; 368: 733-43.
3. Mosmann TR, Coffman RL. TH1 and TH2 cells: different patterns of lymphokine secretion lead to different functional properties. *Ann Rev Immunol* 1989; 7: 145-73.
4. Zhu J, Paul WE. CD4 T cells: fates, functions, and faults. *Blood* 2008; 112: 1557-69.
5. Elghazali G, Perlmann H, Rutta AS, Perlmann P, Troye-Blomberg M. Elevated plasma levels of IgE in *Plasmodium falciparum*-primed individuals reflect an increased ratio of IL-4 to interferon-gamma (IFN-gamma)-producing cells. *Clin Exp Immunol* 1997; 109: 84-9.

1  
2  
3  
4  
5  
6  
7  
8  
9  
10  
11  
12  
13  
14  
15  
16  
17  
18  
19  
20  
21  
22  
23  
24  
25  
26  
27  
28  
29  
30  
31  
32  
33  
34  
35  
36  
37  
38  
39  
40  
41  
42  
43  
44  
45  
46  
47  
48  
49  
50  
51  
52  
53  
54  
55  
56  
57  
58  
59  
60

6. Perlmann P, Perlmann H, ElGhazali G, Blomberg MT. IgE and tumor necrosis factor in malaria infection. *Immunol Lett* 1999; 65: 29-33.

7. Tangteerawatana P, Perlmann H, Hayano M, Kalambaheti T, Troye-Blomberg M, Khusmith S. IL4 gene polymorphism and previous malaria experiences manipulate anti-*Plasmodium falciparum* antibody isotype profiles in complicated and uncomplicated malaria. *Malaria J* 2009 ; 8: 286-95.

8. ~~Cohen S, McGregor IA, Carrington S. Gamma-globulin and acquired immunity to human malaria. *Nature* 1961; 192: 733-7.~~ ~~Taylor-Robinson AW. Malaria-specific IgE as a risk factor for cancer and atopy. *Am J Trop Med Hyg* 1998; 59: 181.~~

9. ~~Perlmann H, Helmby H, Hagstedt M, Carlson J, Larsson PH, Troye-Blomberg M, et al. IgE elevation and IgE anti-malarial antibodies in *Plasmodium falciparum* malaria: association of high IgE levels with cerebral malaria. *Clin Exp Immunol* 1994; 97: 284-92.~~

10. ~~Duarte J, Deshpande P, Guiyedi V, Mécheri S, Fesel C, Cazenave PA, et al. Total and functional parasite specific IgE responses in *Plasmodium falciparum*-infected patients exhibiting different clinical status. *Malar J* 2007; 6:1.~~

11. Stein RT, Sherrill D, Morgan WJ, Holberg CJ, Halonen M, Taussig LM et al. Respiratory syncytial virus in early life and risk of wheeze and allergy by age 13 years. *Lancet* 1999; 354: 541-5.

120. Sigurs N, Gustafsson PM, Bjarnason R, Lundberg F, Schmidt S, Sigurbergsson F et al. Severe respiratory syncytial virus bronchiolitis in infancy and asthma and allergy at age 13. *Am J Resp Crit Care Med* 2005; 171: 137-41.

131. Shaheen SO, Aaby P, Hall AJ, Barker DJ, Heyes CB, Shiell AW, et al. Measles and atopy Guinea-Bissau. *Lancet* 1996; 347: 1792-96.

142. McIntire JJ, Umetsu SE, Macaubas C, Hoyte EG, Cinnioğlu C, Cavalli-Sforza LL et al. Immunology: hepatitis A virus link to atopic disease. *Nature* 2003; 425: 576.

153. Shirakawa T, Enomoto T, Shimazu S, Hopkin JM. The inverse association between tuberculin responses and atopic disorder. *Science* 1997; 275: 77-9.

Formatted: French (France)

Formatted: English (U.K.)

- 1  
2  
3  
4  
5  
6  
7 164. Gould HJ, Takhar P, Harries HE, Chevretton E, Sutton BJ. The allergic march from  
8 *Staphylococcus aureus* superantigens to immunoglobulin E. *Chem Immunol Allergy*  
9 2007; 93: 106-36.
- 11 175. Jang N, Stewart G, Jones G. Polymorphisms within the PHF11 gene at chromosome  
12 13q14 are associated with childhood atopic dermatitis. *Genes Immun* 2005; 6: 262-4.
- 15 186. Kurz T, Hoffjan S, Hayes MG, Schneider D, Nicolae R, Heinzmann A, et al. Fine  
16 mapping and positional candidate studies on chromosome 5p13 identify multiple  
17 asthma susceptibility loci. *J Allergy Clin Immunol* 2006; 118: 396-402.
- 20 197. Zhang Y, Leaves NI, Anderson GG, Ponting CP, Broxholme J, Holt R, et al. Positional  
21 cloning of a quantitative trait locus on chromosome 13q14 that influences  
22 immunoglobulin E levels and asthma. *Nat Genet* 2003; 34: 181-6.
- 25 2018. Sakuntabhai A, Ndiaye R, Casademont I, Peerapittayamongkol C, Rogier C, Tortevoe  
26 P, et al. Genetic determination and linkage mapping of *Plasmodium falciparum*  
27 malaria related traits in Senegal. *PLoS ONE* 2008; 3: e2000.
- 30 2119. Cargill M, Schrodli SJ, Chang M, Garcia VE, Brandon R, et al. A large-scale genetic  
31 association study confirms IL12B and leads to the identification of IL23R as psoriasis-  
32 risk genes. *Am J Hum Genet* 2007; 80: 273-90.
- 35 220. Haileamlak A, Dagoye D, Williams H, Venn AJ, Hubbard R, Britton J, et al. Early life risk  
36 factors for atopic dermatitis in Ethiopian children. *J Allergy Clin Immunol* 2005; 115:  
37 370-6.
- 40 231. Kohara Y, Tanabe K, Matsuoka K, Kanda N, Matsuda H, Karasuyama H, et al. A major  
41 determinant quantitative-trait locus responsible for atopic dermatitis-like skin lesions  
42 in NC/Nga mice is located on Chromosome 9. *Immunogenetics* 2001; 53: 15-21.
- 45 242. Beghdadi W, Porcherie A, Schneider BS, Dubayle D, Peronet R, Huerre M, et al.  
46 Inhibition of histamine-mediated signaling confers significant protection against  
47 severe malaria in mouse models of disease. *J Exp Med* 2008; 205: 395-408.
- 50 253. Srichaikul T, Archararit N, Siriasawakul T, Viriyapanich T. Histamine changes in  
51 *Plasmodium falciparum* malaria. *Trans R Soc Trop Med Hyg* 1976; 70: 36-8.

1  
2  
3  
4  
5  
6  
7  
8  
9  
10  
11  
12  
13  
14  
15  
16  
17  
18  
19  
20  
21  
22  
23  
24  
25  
26  
27  
28  
29  
30  
31  
32  
33  
34  
35  
36  
37  
38  
39  
40  
41  
42  
43  
44  
45  
46  
47  
48  
49  
50  
51  
52  
53  
54  
55  
56  
57  
58  
59  
60

264. Bhattacharya U, Roy S, Kar PK, Sarangi B, Lahiri SC. Histamine & kinin system in experimental malaria. *Indian J Med Res* 1988; 88: 558–63.

275. Trape JF, Tall A, Diagne N, Ndiath O, Ly AB, Faye J, et al. Malaria morbidity and pyrethroid resistance after the introduction of insecticide-treated bednets and artemisinin-based combination therapies: a longitudinal study. *Lancet Infect Dis* 2011; 11: 925-32.

286. Abecasis GR, Cherny SS, Cookson WO, Cardon LR. Merlin-- rapid analysis of dense genetic maps using sparse gene flow trees. *Nat Genet* 2001; 30: 97-101.

297. Asher MI, Keil U, Anderson HR, Beasley R, Crane J, Martinez F, et al. International Study of Asthma and Allergies in Childhood (ISAAC): rationale and methods. *Eur Respir J* 1995; 8: 483-91.

3028. Yamada E, Vanna AT, Nasipitz CK, Solé D. International Study of Asthma and Allergies in Childhood (ISAAC): validation of the written questionnaire (eczema component) and prevalence of atopic eczema among Brazilian children. *J Investig Allergol Clin Immunol* 2002; 12: 34-41.

3129. Nacher M. Malaria vaccine trials in a wormy world. *Trends Parasitol* 2001; 17: 563-5

320. Yazdanbakhsh M, Kremsner PG, van Ree R. Allergy, parasites, and the hygiene hypothesis. *Science* 2002; 296: 490-4.

331. Lawaly R, Konate L, Marrama L, Dia I, Diallo D, Diène Sarr F, et al. Impact of mosquito bites on asexual parasite density and gametocyte prevalence in asymptomatic chronic *Plasmodium falciparum* infections and correlation with IgE and IgG titres. *Infection and Immunity* 2012; 80: 2240-6.

342. Machado A, Loucoubar C, Grange L, Bureau JF, Sakuntabhai A, Paul R. Human genetic contribution to the outcome of infection with malaria parasites. In: MALARIA PARASITES, ISBN: 979-953-307-072-7, Okwa O (Ed.), INTECH, Rijeka 2012; 267-292.

353. Doolan DL, Dobaño C, Baird JK. Acquired Immunity to Malaria. *Clin Microbiol Rev* 2009; 22: 13–36.

364. Marsh K, Snow RW. Host-parasite interaction and morbidity in malaria endemic areas. *Philos Trans R Soc London B* 1997; 352: 1385–94.

375. Perignon JL, Druilhe P. Immune mechanisms underlying the premonition against *Plasmodium falciparum* malaria. *Mem Inst Oswaldo Cruz* 1994; 89 Suppl. 2: 51–3.
386. Lell B, Borrmann S, Yazdanbakhsh M, Kremsner PG. Atopy and malaria. *Wien Klin Wochenschr* 2001; 113: 927-9.
397. Westritschnig K, Sibanda E, Thomas W, Auer H, Aspöck H, Pittner G, et al. Analysis of the sensitization profile towards allergens in central Africa. *Clin Exp Allergy* 2003; 33: 22-7.
- ~~38. Cohen S, McGregor IA, Carrington S. Gamma globulin and acquired immunity to human malaria. *Nature* 1961; 192: 733–7.~~
4039. de Jong EC, Vieira PL, Kalinski P, Schuitemaker JH, Tanaka Y, Wierenga EA et al. Microbial compounds selectively induce Th1 cell-promoting or Th2 cell-promoting dendritic cells *in vitro* with diverse Th cell-polarizing signals. *J Immunol* 2002; 168: 1704–9.
410. Baird JK. Age-dependent characteristics of protection versus susceptibility to *Plasmodium falciparum*. *Ann Trop Med Parasitol* 1998; 92: 367–90.
421. Mecheri S. Contribution of allergic inflammatory response to the pathogenesis of malaria disease. *Biochim Biophys Acta* 2011; 1822: 49-56.
432. Sowunmi A, Gbotosho GO, Happi CT, Adedeji AA, Bolaji OM, Fehintola FA, et al. Enhancement of the antimalarial efficacy of amodiaquine by chlorpheniramine *in vivo*. *Mem Inst Oswaldo Cruz* 2007; 102: 417-9.
443. Chong CR, Chen X, Shi L, Liu JO, Sullivan DJ. A clinical drug library screen identifies astemizole as an antimalarial agent. *Nat Chem Biol* 2006; 2: 415-416.
454. MacDonald SM, Bhisutthibhan J, Shapiro TA, Rogerson SJ, Taylor TE, Tembo M, et al. Immune mimicry in malaria: *Plasmodium falciparum* secretes a functional histamine-releasing factor homolog *in vitro* and *in vivo*. *Proc Natl Acad Sci USA* 2001; 98: 10829-32.
465. De Silva PM, Marshall JM. Factors contributing to urban malaria transmission in sub-saharan Africa: a systematic review. *J Trop Med* 2012; doi: 10.1155/2012/819563.

Formatted: Indent: Left: -0.5", Hanging: 0.5"

Formatted: Indent: Left: 0", Hanging: 0.5"

1  
2  
3  
4  
5  
6  
7  
8  
9  
10  
11  
12  
13  
14  
15  
16  
17  
18  
19  
20  
21  
22  
23  
24  
25  
26  
27  
28  
29  
30  
31  
32  
33  
34  
35  
36  
37  
38  
39  
40  
41  
42  
43  
44  
45  
46  
47  
48  
49  
50  
51  
52  
53  
54  
55  
56  
57  
58  
59  
60

476. Bob NS, Diop BM, Renaud F, Marrama L, Durand P, Tall A, et al. Parasite polymorphism and severe malaria in Dakar (Senegal): a West African urban area. *PLoS One* 2010; 5: e9817.

487. Musonda CC, Whitlock GA, Witty MJ, Brun R, Kaiser M. Chloroquine-astemizole hybrids with potent *in vitro* and *in vivo* antiplasmodial activity. *Bioorg Med Chem Lett* 2009; 19: 481-4.

498. Egan TJ, Kaschula CH. Strategies to reverse drug resistance in malaria. *Curr Opin Infect Dis* 2007; 20: 598-604.

**Table 1 Classification of Asthma, Allergic rhinoconjunctivitis, Atopic dermatitis and overall Atopic status according to ISAAC questionnaire in children aged 0-14 from a malaria birth cohort.** N is total number of children examined and n-malaria represents those for whom malaria data were recorded. F is the number of females and M the number of males.

|                                     | N (F/M)     | %     | n-malaria (F/M) |
|-------------------------------------|-------------|-------|-----------------|
| <b>Asthma symptoms</b>              |             |       |                 |
| None                                | 153 (73/80) | 87.43 | 125 (59/66)     |
| Moderate                            | 4 (1/3)     | 2.29  | 4 (1/3)         |
| Severe                              | 18 (6/12)   | 10.29 | 14 (4/10)       |
| <b>Rhinoconjunctivitis symptoms</b> |             |       |                 |
| None                                | 146 (64/82) | 83.43 | 120 (52/68)     |
| Moderate                            | 11 (8/3)    | 6.29  | 9 (6/3)         |
| Severe                              | 18 (6/12)   | 10.29 | 14 (6/8)        |
| <b>Atopic dermatitis symptoms</b>   |             |       |                 |
| None                                | 159 (75/84) | 90.86 | 128 (60/68)     |
| Moderate                            | 11 (1/10)   | 6.29  | 11 (1/10)       |
| Severe                              | 5 (4/1)     | 2.86  | 4 (3/1)         |
| <b>Atopic tendency</b>              |             |       |                 |
| Unlikely                            | 119 (56/63) | 68.00 | 97 (46/51)      |
| Probable                            | 16 (8/8)    | 9.14  | 14 (6/8)        |
| Highly probable                     | 40 (16/24)  | 22.86 | 32 (12/20)      |

1  
2  
3  
4  
5  
6  
7  
8  
9  
10  
11  
12  
13  
14  
15  
16  
17  
18  
19  
20  
21  
22  
23  
24  
25  
26  
27  
28  
29  
30  
31  
32  
33  
34  
35  
36  
37  
38  
39  
40  
41  
42  
43  
44  
45  
46  
47  
48  
49  
50  
51  
52  
53  
54  
55  
56  
57  
58  
59  
60

**Table 2 Impact of allergy status on risk of *P. falciparum* clinical episodes.** Shown are the *P* values and adjusted Odds Ratios with 95% confidence intervals calculated from the mixed model analyses. Values for the covariables Age ( $\geq 3.5$  years of age compared to  $< 3.5$  years of age), Trimestrial incidence of *P. falciparum* clinical episodes and HbAS (beta-globin sickle cell trait; AS compared to AA) are those from the Asthma model analysis. For clarity significant co-variables are shown in bold.

| Age groups $< 3.5$ years |                              | ORa         | 95% Confidence Intervals |             | P value                                 |
|--------------------------|------------------------------|-------------|--------------------------|-------------|-----------------------------------------|
|                          |                              |             | Lower                    | Upper       |                                         |
| Atopy                    | <b>Both</b>                  | <b>1.65</b> | <b>1.20</b>              | <b>2.26</b> | <b><math>2.0 \times 10^{-3}</math></b>  |
|                          | $< 3.5$                      | 1.38        | 0.92                     | 2.08        | 0.124                                   |
|                          | <b><math>\geq 3.5</math></b> | <b>2.02</b> | <b>1.39</b>              | <b>2.93</b> | <b><math>2.1 \times 10^{-4}</math></b>  |
| Asthma                   | <b>Both</b>                  | <b>2.12</b> | <b>1.46</b>              | <b>3.08</b> | <b><math>8.0 \times 10^{-5}</math></b>  |
|                          | $< 3.5$                      | 1.50        | 0.90                     | 2.50        | 0.122                                   |
|                          | <b><math>\geq 3.5</math></b> | <b>2.33</b> | <b>1.50</b>              | <b>3.61</b> | <b><math>1.5 \times 10^{-4}</math></b>  |
| Atopic dermatitis        | Both                         | 1.05        | 0.65                     | 1.70        | 0.842                                   |
|                          | $< 3.5$                      | 0.84        | 0.49                     | 1.46        | 0.539                                   |
|                          | <b><math>\geq 3.5</math></b> | <b>3.15</b> | <b>1.56</b>              | <b>6.33</b> | <b><math>1.3 \times 10^{-3}</math></b>  |
| Rhinoconjunctivitis      | Both                         | 0.96        | 0.65                     | 1.41        | 0.818                                   |
|                          | $< 3.5$                      | 1.05        | 0.64                     | 1.72        | 0.853                                   |
|                          | $\geq 3.5$                   | 0.95        | 0.60                     | 1.52        | 0.834                                   |
| Age $\geq 3.5$           |                              | <b>0.48</b> | <b>0.40</b>              | <b>0.57</b> | <b><math>2.7 \times 10^{-15}</math></b> |
| Trimestrial incidence    |                              | <b>1.01</b> | <b>1.00</b>              | <b>1.01</b> | <b><math>1.8 \times 10^{-6}</math></b>  |
| HbAS                     |                              | <b>0.24</b> | <b>0.12</b>              | <b>0.47</b> | <b><math>3.7 \times 10^{-5}</math></b>  |

**Table 3 Impact of allergy status on the maximum *P. falciparum* parasite density during a clinical malaria episode.** Shown are the back-transformed mean parasite densities per microlitre and standard errors (SEM) estimated from the GLMM analyses after taking into account the other co-variables. Significantly different effects are shown in bold for clarity.

| Allergic condition  | Age groups  | Allergic status<br>(No/Yes) | Mean parasite density | SEM  | P value                     |
|---------------------|-------------|-----------------------------|-----------------------|------|-----------------------------|
| Atopy               | <b>Both</b> | <b>N</b>                    | <b>76.3</b>           | 13.8 | <b>0.0158</b>               |
|                     |             | <b>Y</b>                    | <b>131.0</b>          | 36.4 |                             |
|                     | <3.5        | N                           | 114.3                 | 23.7 | 0.148                       |
|                     |             | Y                           | 171.1                 | 56.0 |                             |
|                     | <b>≥3.5</b> | <b>N</b>                    | <b>48.4</b>           | 9.8  | <b>9.5x10<sup>-4</sup></b>  |
|                     |             | <b>Y</b>                    | <b>114.8</b>          | 37.1 |                             |
| Asthma              | <b>Both</b> | <b>N</b>                    | <b>78.1</b>           | 14.4 | <b>3.8 x10<sup>-3</sup></b> |
|                     |             | <b>Y</b>                    | <b>148.5</b>          | 44.3 |                             |
|                     | <3.5        | N                           | 114.8                 | 24.3 | 0.167                       |
|                     |             | Y                           | 171.9                 | 74.5 |                             |
|                     | <b>≥3.5</b> | <b>N</b>                    | <b>51.3</b>           | 9.7  | <b>6.2 x10<sup>-3</sup></b> |
|                     |             | <b>Y</b>                    | <b>105.3</b>          | 41.0 |                             |
| Atopic dermatitis   | Both        | N                           | 82.6                  | 15.0 | 0.605                       |
|                     |             | Y                           | 93.9                  | 38.9 |                             |
|                     | <3.5        | N                           | 122.6                 | 25.5 | 0.425                       |
|                     |             | Y                           | 133.9                 | 63.5 |                             |
|                     | <b>≥3.5</b> | <b>N</b>                    | <b>52.3</b>           | 11.0 | <b>0.014</b>                |
|                     |             | <b>Y</b>                    | <b>135.4</b>          | 70.7 |                             |
| Rhinoconjunctivitis | Both        | N                           | 81.5                  | 14.8 | 0.570                       |
|                     |             | Y                           | 111.4                 | 39.0 |                             |
|                     | <3.5        | N                           | 118.8                 | 25.1 | 0.537                       |
|                     |             | Y                           | 166.3                 | 69.9 |                             |
|                     | <b>≥3.5</b> | <b>N</b>                    | <b>54.6</b>           | 11.3 | 0.327                       |
|                     |             | <b>Y</b>                    | <b>80.9</b>           | 33.7 |                             |

1  
2  
3  
4  
5  
6  
7  
8  
9  
10  
11  
12  
13  
14  
15  
16  
17  
18  
19  
20  
21  
22  
23  
24  
25  
26  
27  
28  
29  
30  
31  
32  
33  
34  
35  
36  
37  
38  
39  
40  
41  
42  
43  
44  
45  
46  
47  
48  
49  
50  
51  
52  
53  
54  
55  
56  
57  
58  
59  
60

**Figure 1** Annual incidence rate of clinical *P. falciparum* episodes per 100 children (bold line). In order to overcome the fluctuations of the annual incidence rate, we fit second (dotted line), third (dashed line) and fourth (solid line) degree polynomial trend lines to the data (bold line). The corresponding R-squared values are 0.70, 0.91 and 0.99 respectively indicating an accurate fit for third and fourth order polynomials. The inflexion on these two trend lines indicates the onset of acquisition of clinical immunity at approximately 3 to 4 years of age.

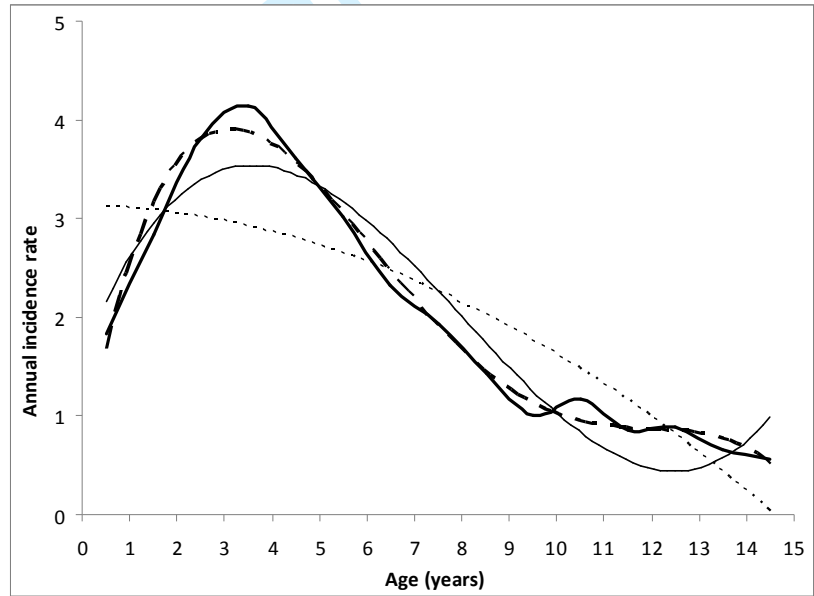

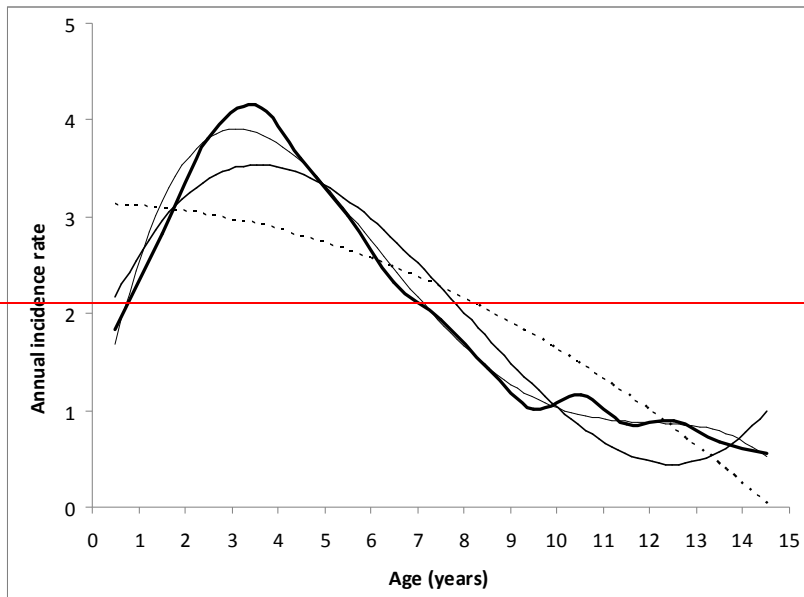

1  
2  
3  
4  
5  
6  
7  
8  
9  
10  
11  
12  
13  
14  
15  
16  
17  
18  
19  
20  
21  
22  
23  
24  
25  
26  
27  
28  
29  
30  
31  
32  
33  
34  
35  
36  
37  
38  
39  
40  
41  
42  
43  
44  
45  
46  
47  
48  
49  
50  
51  
52  
53  
54  
55  
56  
57  
58  
59  
60

**Figure 2** Mean cumulative number of *P. falciparum* clinical episodes with age for the (A) Asthma, (B) Rhinoconjunctivitis and (C) Atopic dermatitis classes and overall Atopy class (D) (bold lines) compared to individuals without symptoms of each respective allergy type (thin lines). In all cases moderate and severe classes are combined and compared to individuals without allergy symptoms. Note there are no children older than 11 years of age with Atopic dermatitis.

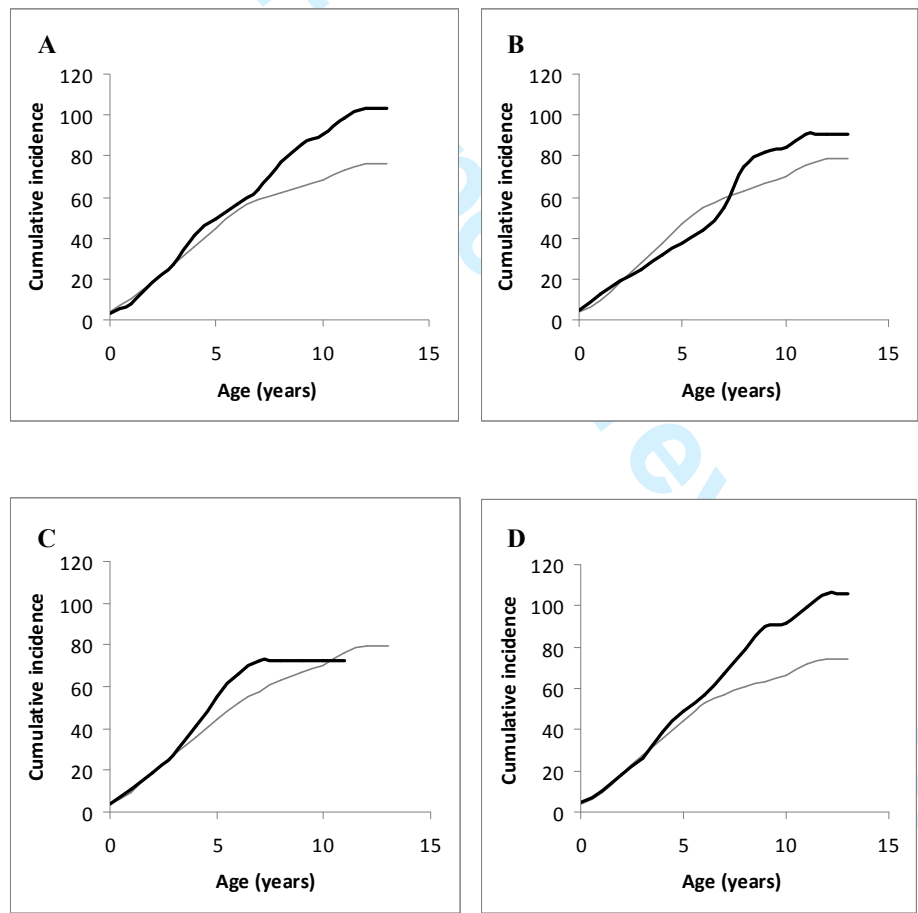

|                                                                                                             |                                                   |            |             |
|-------------------------------------------------------------------------------------------------------------|---------------------------------------------------|------------|-------------|
| 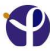<br><b>INSTITUT PASTEUR</b> | Unit of Functional Genetics of Infectious Disease | Coding :   |             |
|                                                                                                             | ENREGISTREMENT                                    | 03/MM/YYYY | Version : 1 |
| <b>ALLERGY MODIFIED ISAAC QUESTIONNAIRE</b>                                                                 |                                                   |            |             |

|                                                                              |                                                                                                                |
|------------------------------------------------------------------------------|----------------------------------------------------------------------------------------------------------------|
| <b>Place of study</b><br>Technician X<br>Technician X<br>Technician X<br>☎ + | <b>Research Institute responsible</b><br>Name of Institute<br>Principle investigator<br>Project manager<br>☎ + |
|------------------------------------------------------------------------------|----------------------------------------------------------------------------------------------------------------|

| IDENTIFICATION                                                                                                                                                                                                                                                         | Validation zone                                                                                                                      |
|------------------------------------------------------------------------------------------------------------------------------------------------------------------------------------------------------------------------------------------------------------------------|--------------------------------------------------------------------------------------------------------------------------------------|
| Date of questionnaire : <input type="text"/> <input type="text"/> <input type="text"/> <input type="text"/> <input type="text"/> <input type="text"/> dd/mm/yyyy                                                                                                       | <input type="text"/> <input type="text"/> <input type="text"/> <input type="text"/> <input type="text"/> <input type="text"/> DTEQUE |
| Name of investigator : .....                                                                                                                                                                                                                                           |                                                                                                                                      |
| Name of study supervisor : .....                                                                                                                                                                                                                                       |                                                                                                                                      |
| <b>Child :</b>                                                                                                                                                                                                                                                         |                                                                                                                                      |
| First and last name of child :                                                                                                                                                                                                                                         |                                                                                                                                      |
| Identification code of child :                                                                                                                                                                                                                                         | <input type="text"/> <input type="text"/> <input type="text"/> <input type="text"/> IDENF                                            |
| Date of birth :                                                                                                                                                                                                                                                        | <input type="text"/> <input type="text"/> <input type="text"/> <input type="text"/> <input type="text"/> <input type="text"/> DOB    |
| Sex :                                                                                                                                                                                                                                                                  | <input type="text"/> SEXE                                                                                                            |
| Village/town :                                                                                                                                                                                                                                                         | <input type="text"/> VILLAGE                                                                                                         |
| Identification code of Questionnaire :                                                                                                                                                                                                                                 | <input type="text"/> <input type="text"/> <input type="text"/> <input type="text"/> <input type="text"/> <input type="text"/> IDQUES |
| Identification code of father :                                                                                                                                                                                                                                        | <input type="text"/> <input type="text"/> IDFA                                                                                       |
| Identification code of mother :                                                                                                                                                                                                                                        | <input type="text"/> <input type="text"/> IDMO                                                                                       |
| Weight : <input type="text"/> <input type="text"/> <input type="text"/> (kg)                                                                                                                                                                                           | <input type="text"/> <input type="text"/> <input type="text"/> (Kg) WEIGHT                                                           |
| Height : <input type="text"/> <input type="text"/> <input type="text"/> <input type="text"/> (cm)                                                                                                                                                                      | <input type="text"/> <input type="text"/> <input type="text"/> <input type="text"/> (cm) HEIGHT                                      |
| Mid Upper Arm Circumference: <input type="text"/> <input type="text"/> (cm)                                                                                                                                                                                            | <input type="text"/> <input type="text"/> (cm) MUAC                                                                                  |
| <b>Person questioned :</b>                                                                                                                                                                                                                                             |                                                                                                                                      |
| Last name of person questioned : .....                                                                                                                                                                                                                                 | ..... NAMEPQ                                                                                                                         |
| First name of person questioned : .....                                                                                                                                                                                                                                | ..... LASTNAMEPQ                                                                                                                     |
| Relationship to child : Mother <input type="checkbox"/> <sub>1</sub> Father <input type="checkbox"/> <sub>2</sub> Brother/Sister <input type="checkbox"/> <sub>3</sub> Grand-parents <input type="checkbox"/> <sub>4</sub> Other <input type="checkbox"/> <sub>5</sub> | <input type="text"/> RELCHILD                                                                                                        |
| If other, define : .....                                                                                                                                                                                                                                               | ..... OTHERREL                                                                                                                       |
| <b>FACTORS PREDISPOSING ATOPY</b>                                                                                                                                                                                                                                      |                                                                                                                                      |
| <b>First days of life :</b> Consultation of health records of child and maternity records of mother                                                                                                                                                                    |                                                                                                                                      |
| 1. How much did your child weigh at birth ?                                                                                                                                                                                                                            |                                                                                                                                      |
| <input type="checkbox"/> <sub>1</sub> <1500 g <input type="checkbox"/> <sub>4</sub> [2500-3500[ g                                                                                                                                                                      | <input type="text"/> BIRTHWEIGH                                                                                                      |
| <input type="checkbox"/> <sub>2</sub> [1500-2000[ g <input type="checkbox"/> <sub>5</sub> ≥ 3500 g                                                                                                                                                                     |                                                                                                                                      |
| <input type="checkbox"/> <sub>3</sub> [2000-2500[ g <input type="checkbox"/> <sub>9</sub> Record not found/NSP                                                                                                                                                         |                                                                                                                                      |
| 2. Until what age did your child breastfeed (exclusively or mixed) ?                                                                                                                                                                                                   |                                                                                                                                      |
| Corresponds to the age of weaning of child                                                                                                                                                                                                                             |                                                                                                                                      |
| < 6 months <input type="checkbox"/> <sub>1</sub> 6 – 12 mths <input type="checkbox"/> <sub>2</sub> 12 – 24 mths <input type="checkbox"/> <sub>3</sub> >24 mths <input type="checkbox"/> <sub>4</sub> NSP <input type="checkbox"/> <sub>9</sub>                         | <input type="text"/> AGEWEAN                                                                                                         |

3. Until what age did your child breastfeed **exclusively** without ever taking other aliments (fruits, vegetables, rice, meat, fish, etc.) or liquids (powdered milk, cow or goats milk, fruit juice, water, etc.) ?
- < 6 months ☐\_1 6 – 12 mths ☐\_2 12 – 24 mths ☐\_3 NSP ☐\_9

☐ AGEBREAST

**Illness and vaccination :** Consultation of health records of child

1. Has your child enfant had the following illnesses?

Malaria : ☐\_0 No ☐\_1 Yes ☐\_9 NSP

Tuberculosis treated : ☐\_0 No ☐\_1 Yes ☐\_9 NSP

Helminths (oxyures, ascaris, taenia, etc.) : ☐\_0 No ☐\_1 Yes ☐\_9 NSP

Amoeba : ☐\_0 No ☐\_1 Yes ☐\_9 NSP

Measles : ☐\_0 No ☐\_1 Yes ☐\_9 NSP

☐ MALAR

☐ TUBTRT

☐ HEMINTH

☐ AMOEBA

☐ MEASLES

2. Against what illnesses is you child vaccinated?

Yellow fever : ☐\_0 No ☐\_1 Yes ☐\_9 NSP

Hepatitis B : ☐\_0 No ☐\_1 Yes ☐\_9 NSP

Measles : ☐\_0 No ☐\_1 Yes ☐\_9 NSP

Mumps : ☐\_0 No ☐\_1 Yes ☐\_9 NSP

Rubella : ☐\_0 No ☐\_1 Yes ☐\_9 NSP

Tuberculosis/BCG : ☐\_0 No ☐\_1 Yes ☐\_9 NSP

Diphtheria/Tetanus/Pertussis/Poliomyelitis : ☐\_0 No ☐\_1 Yes ☐\_9 NSP

Typhoid : ☐\_0 No ☐\_1 Yes ☐\_9 NSP

Meningitis : ☐\_0 No ☐\_1 Yes ☐\_9 NSP

Haemophilus influenzae type B (HiB) : ☐\_0 No ☐\_1 Yes ☐\_9 NSP

☐ VACFJ

☐ VACHEPB

☐ VACMEASLE

☐ VACMUMPS

☐ VACRUBEL

☐ VACTUB

☐ VACDTCP

☐ VACTY

☐ VACMENIN

☐ VACHIB

**Habitation :**

1. Which of these animals / insects can be found in the **rooms** where your child lives (today and/or during his first year of life) ?

Dogs in rooms today : ☐\_0 No ☐\_1 Yes ☐\_9 NSP

Dogs in rooms 0-1yr : ☐\_0 No ☐\_1 Yes ☐\_9 NSP

Cats in rooms today : ☐\_0 No ☐\_1 Yes ☐\_9 NSP

Cats in rooms 0-1yr : ☐\_0 No ☐\_1 Yes ☐\_9 NSP

Sheep in rooms today : ☐\_0 No ☐\_1 Yes ☐\_9 NSP

Sheep in rooms 0-1yr : ☐\_0 No ☐\_1 Yes ☐\_9 NSP

Goats in rooms today : ☐\_0 No ☐\_1 Yes ☐\_9 NSP

Goats in rooms 0-1yr : ☐\_0 No ☐\_1 Yes ☐\_9 NSP

Chicken, ducks in rooms today : ☐\_0 No ☐\_1 Yes ☐\_9 NSP

Chicken, ducks in rooms 0-1yr : ☐\_0 No ☐\_1 Yes ☐\_9 NSP

Rodents (rats, mice, etc.) in rooms today : ☐\_0 No ☐\_1 Yes ☐\_9 NSP

Rodents (rats, mice, etc.) in rooms 0-1yr : ☐\_0 No ☐\_1 Yes ☐\_9 NSP

Cockroaches in rooms today : ☐\_0 No ☐\_1 Yes ☐\_9 NSP

Cockroaches in rooms 0-1yr : ☐\_0 No ☐\_1 Yes ☐\_9 NSP

Other in rooms today : ☐\_0 No ☐\_1 Yes ☐\_9 NSP

Other in rooms 0-1yr : ☐\_0 No ☐\_1 Yes ☐\_9 NSP

☐ DOGTODAY

☐ DOG01YR

☐ CATTODAY

☐ CAT01YR

☐ SHEEPTODAY

☐ SHEEP01YR

☐ GOATODAY

☐ GOA01YR

☐ CHICTODAY

☐ CHIC01YR

☐ RODTODAY

☐ ROD01YR

☐ COCTODAY

☐ COC01YR

☐ OTHTODAY

☐ OTH01YR

If Others, define : .....

..... NAMEOTH

2. Which of these animals could be in **contact** with your child **at least once per week**

(today and/or during his first year of life) ?

Contact with Dogs today : ☐ No ☐ Yes ☐ NSP

Contact with Dogs 0-1yr : ☐ No ☐ Yes ☐ NSP

Contact with Cats today : ☐ No ☐ Yes ☐ NSP

Contact with Cats 0-1yr : ☐ No ☐ Yes ☐ NSP

Contact with Sheep today : ☐ No ☐ Yes ☐ NSP

Contact with Sheep 0-1yr : ☐ No ☐ Yes ☐ NSP

Contact with Goats today : ☐ No ☐ Yes ☐ NSP

Contact with Goats 0-1yr : ☐ No ☐ Yes ☐ NSP

Contact with Chicken, Ducks today : ☐ No ☐ Yes ☐ NSP

Contact with Chicken, Ducks 0-1yr : ☐ No ☐ Yes ☐ NSP

Contact with donkeys, horses today : ☐ No ☐ Yes ☐ NSP

Contact with donkeys, horses 0-1yr : ☐ No ☐ Yes ☐ NSP

Contact with Cows, zébus today : ☐ No ☐ Yes ☐ NSP

Contact with Cows, zébus 0-1yr : ☐ No ☐ Yes ☐ NSP

Contact with Rodents (rats, mice, etc.) today : ☐ No ☐ Yes ☐ NSP

Contact with Rodents (rats, mice, etc.) 0-1yr : ☐ No ☐ Yes ☐ NSP

Contact with Other today : ☐ No ☐ Yes ☐ NSP

Contact with Other 0-1yr : ☐ No ☐ Yes ☐ NSP

If Others, define : .....

CDOGTODAY

CDOG01YR

CCATODAY

CCAT01YR

CSHEEPTODAY

CSHEEP01YR

CGOATODAY

CGOA01YR

CCHICTODAY

CCHIC01YR

CHORSTODAY

CHORS01YR

CCOWTODAY

CCOW01YR

CRODTODAY

CROD01YR

COTHTODAY

COTH01YR

NAMEOTHC

### 3. Which of these aliments are usually stocked in the rooms where your child lives ?

Millet kept in room : ☐ No ☐ Yes ☐ NSP

Sorghum kept in room : ☐ No ☐ Yes ☐ NSP

Maize kept in room : ☐ No ☐ Yes ☐ NSP

Rice kept in room : ☐ No ☐ Yes ☐ NSP

Wheat kept in room : ☐ No ☐ Yes ☐ NSP

Biscuits, pasta kept in room : ☐ No ☐ Yes ☐ NSP

Manioc (root, flour) kept in room : ☐ No ☐ Yes ☐ NSP

Cashew nut, ground nut kept in room : ☐ No ☐ Yes ☐ NSP

Curdled milk kept in room : ☐ No ☐ Yes ☐ NSP

Dried leaves (mint, quinquilba, baobab, etc.) : ☐ No ☐ Yes ☐ NSP

Other aliments kept in room : ☐ No ☐ Yes ☐ NSP

If Others, define : .....

MIL

SORG

MAIZ

RICE

WHEA

BISCUI

MANIOC

NUTP

MILKCURD

LEAF

OTHALIM

NAMEOTHAL

What is the type of roofing of the rooms where your child lives (today and during the first year of life) ?

Corrugated metal roof today : ☐ No ☐ Yes ☐ NSP

Corrugated metal roof 0-1yr : ☐ No ☐ Yes ☐ NSP

Thatched roof today : ☐ No ☐ Yes ☐ NSP

Thatched roof 0-1yr : ☐ No ☐ Yes ☐ NSP

Wooden roof today : ☐ No ☐ Yes ☐ NSP

Wooden roof 0-1yr : ☐ No ☐ Yes ☐ NSP

Cement roof today : ☐ No ☐ Yes ☐ NSP

Cement roof 0-1yr : ☐ No ☐ Yes ☐ NSP

Plaster roof today : ☐ No ☐ Yes ☐ NSP

Plaster roof 0-1yr : ☐ No ☐ Yes ☐ NSP

Other type of roof today : ☐ No ☐ Yes ☐ NSP

RMETTODAY

RMET01YR

RTHATDAY

RTHAT01YR

RWOOTODAY

RWOO01YR

RCEMTODAY

RCEM01YR

RPLATODAY

RPLA01YR

ROTHTODAY

1  
2  
3  
4  
5  
6  
7  
8  
9  
10  
11  
12  
13  
14  
15  
16  
17  
18  
19  
20  
21  
22  
23  
24  
25  
26  
27  
28  
29  
30  
31  
32  
33  
34  
35  
36  
37  
38  
39  
40  
41  
42  
43  
44  
45  
46  
47  
48  
49  
50  
51  
52  
53  
54  
55  
56  
57  
58  
59  
60

Other type of roof 0-1yr :  

☐ No ☐ Yes ☐ NSP

If other, define : .....

4. Which of these objects are in the room where your child sleeps (today and during the first year of life) ?  

Mattress in room today :

☐ No ☐ Yes ☐ NSP

Mattress in room 0-1yr :

☐ No ☐ Yes ☐ NSP

Bednet in room today :

☐ No ☐ Yes ☐ NSP

Bednet in room 0-1yr :

☐ No ☐ Yes ☐ NSP

Wardrobe in room today :

☐ No ☐ Yes ☐ NSP

Wardrobe in room 0-1yr :

☐ No ☐ Yes ☐ NSP

Chest, trunk in room today :

☐ No ☐ Yes ☐ NSP

Chest, trunk in room 0-1yr :

☐ No ☐ Yes ☐ NSP

Table in room today :

☐ No ☐ Yes ☐ NSP

Table in room 0-1yr :

☐ No ☐ Yes ☐ NSP

Chair in room today :

☐ No ☐ Yes ☐ NSP

Chair in room 0-1yr :

☐ No ☐ Yes ☐ NSP

Carpet, rug in room today :

☐ No ☐ Yes ☐ NSP

Carpet, rug in room 0-1yr :

☐ No ☐ Yes ☐ NSP

Matting in room today :

☐ No ☐ Yes ☐ NSP

Matting in room 0-1yr :

☐ No ☐ Yes ☐ NSP

Curtains in room today :

☐ No ☐ Yes ☐ NSP

Curtains in room 0-1yr :

☐ No ☐ Yes ☐ NSP

Malagasy fire in room today :

☐ No ☐ Yes ☐ NSP

Malagasy fire in room 0-1yr :

☐ No ☐ Yes ☐ NSP

Other objects in room today :

☐ No ☐ Yes ☐ NSP

Other objects in room 0-1yr :

☐ No ☐ Yes ☐ NSP

If other, define : .....

5. On what type of bedding does your child sleep (today and during the first year of life) ?  

Foam mattress today :

☐ No ☐ Yes ☐ NSP

Foam mattress 0-1yr :

☐ No ☐ Yes ☐ NSP

Plant fibre mattress (straw, etc.) today :

☐ No ☐ Yes ☐ NSP

Plant fibre mattress (straw, etc.) 0-1yr :

☐ No ☐ Yes ☐ NSP

Wool mattress today :

☐ No ☐ Yes ☐ NSP

Wool mattress 0-1yr :

☐ No ☐ Yes ☐ NSP

Feather mattress today :

☐ No ☐ Yes ☐ NSP

Feather mattress 0-1yr :

☐ No ☐ Yes ☐ NSP

Plastic matting today :

☐ No ☐ Yes ☐ NSP

Plastic matting 0-1yr :

☐ No ☐ Yes ☐ NSP

Plant fibre matting (straw, etc.) today :

☐ No ☐ Yes ☐ NSP

Plant fibre matting (straw, etc.) 0-1yr :

☐ No ☐ Yes ☐ NSP

Other type of bedding today :

☐ No ☐ Yes ☐ NSP

Other type of bedding 0-1yr :

☐ No ☐ Yes ☐ NSP

If other, define : .....

6. Does your child sleep on a pillow ?

☐ No ☐ Yes ☐ NSP

If No, go to question 8

☐

ROTH01YR

NAMEOTHR

☐

MATRTODAY

MATR01YR

BEDNTODAY

BEDN01YR

WARDTODAY

WARD01YR

CHESTODAY

CHES01YR

TABPTODAY

TABP01YR

CHPTODAY

CHA01YR

CARPTODAY

CARP01YR

MATPTODAY

MATP01YR

CURTTODAY

CURT01YR

FIRTTODAY

FIR01YR

OTHOBTTODAY

OTHOB01YR

NAMEOTHOB

☐

FMATRTODAY

FMATR01YR

PLFMATRTODAY

PLFMATR01YR

WOMATRTODAY

WOMATR01YR

FEATHMTODAY

FEATHM01YR

PLMATTTODAY

PLMAT01YR

PLFMATTTODAY

PLFMAT01YR

OTHBEDTTODAY

OTHBED01YR

NOMAUTLI

☐

PILLOW

For peer review only - <http://bmjopen4.bmj.com/site/about/guidelines.xhtml>

If **Yes**, what type of pillow is it ?

Foam : ☐ No ☐ Yes ☐ NSP  
 Synthetic fibres: ☐ No ☐ Yes ☐ NSP  
 Plant fibres (straw, etc.) : ☐ No ☐ Yes ☐ NSP  
 Feather : ☐ No ☐ Yes ☐ NSP  
 Other type of pillow : ☐ No ☐ Yes ☐ NSP

If other, define : .....

7. Do people smoke in the room where your child lives ?

Today : ☐ No ☐ Yes ☐ NSP  
 From 0-1yr : ☐ No ☐ Yes ☐ NSP  
 During the pregnancy of the mother : ☐ No ☐ Yes ☐ NSP

8. What type of heating and lighting are used in the rooms where your child lives ?

Heating and lighting by charcoal : ☐ No ☐ Yes ☐ NSP  
 Heating and lighting by wood : ☐ No ☐ Yes ☐ NSP  
 Lighting by candle : ☐ No ☐ Yes ☐ NSP  
 Lighting by petrol lamp : ☐ No ☐ Yes ☐ NSP  
 Lighting by flash light : ☐ No ☐ Yes ☐ NSP  
 Lighting by solar : ☐ No ☐ Yes ☐ NSP  
 Other types of heating and lighting: ☐ No ☐ Yes ☐ NSP

If other, define : .....

9. Which of the following products are used or stocked in the rooms where you child lives ?

Insecticide (type Yotox, spirales, etc.) : ☐ No ☐ Yes ☐ NSP  
 Deodorants (aerosols) : ☐ No ☐ Yes ☐ NSP  
 Incense : ☐ No ☐ Yes ☐ NSP  
 Detergents (type Cotel, etc.) : ☐ No ☐ Yes ☐ NSP  
 Petrol, diesel : ☐ No ☐ Yes ☐ NSP  
 Other types of products : ☐ No ☐ Yes ☐ NSP

If other, define : .....

**Diet :**

1. Has your child had **diarrhoea without fever** or abdominal pains (colic)

**following introduction of non-maternal milk** in his diet (cow or goat's milk, milk powder) : ☐ No ☐ Yes ☐ NSP

**after a few months** of consuming **non-maternal** (cow or goat's milk, milk powder) : ☐ No ☐ Yes ☐ NSP

2. Currently, how many times, on average, does your child eat the following aliments ?

*The consumption of certain aliments is seasonal.*

Meat : ☐ Never ☐ <1times/week ☐ 1-2 times/week ☐ ≥1times/day  
 Fish : ☐ Never ☐ <1times/week ☐ 1-2 times/week ☐ ≥1times/day  
 Egg : ☐ Never ☐ <1times/week ☐ 1-2 times/week ☐ ≥1times/day  
 Milk (liquid, powder, curdled) : ☐ Never ☐ <1times/week ☐ 1-2 times/week ☐ ≥1times/day  
 Banana : ☐ Never ☐ <1times/week ☐ 1-2 times/week ☐ ≥1times/day  
 Mango : ☐ Never ☐ <1times/week ☐ 1-2 times/week ☐ ≥1times/day  
 Melon : ☐ Never ☐ <1times/week ☐ 1-2 times/week ☐ ≥1times/day

PILLF  
 PILLSYN  
 PILLPLF  
 PILLFEATH  
 OTHPILL  
 NAMEOTHPILL

SMOKTODAY  
 SMOK01YR  
 SMOKPREG

CHELCHAR  
 CHELWOO  
 LCAND  
 LLAMP  
 LTORCH  
 LSOLAR  
 OTHHEL  
 NAMEOTHHEL

INSECTIC  
 DEODORA  
 INCENSE  
 DETERGEN  
 PETROL  
 OTHPROD  
 NAMEOTHPR

DIARINT  
 DIARMONTH

CONSMEAT  
 CONSFISH  
 CONSEGG  
 CONSMILK  
 CONSBANA  
 CONSMANG  
 CONSMELON

|                                                                                                                                                                                                                  |                                   |                                          |                                            |                                         |                                   |                                    |                                     |                                 |
|------------------------------------------------------------------------------------------------------------------------------------------------------------------------------------------------------------------|-----------------------------------|------------------------------------------|--------------------------------------------|-----------------------------------------|-----------------------------------|------------------------------------|-------------------------------------|---------------------------------|
| Orange, lime :                                                                                                                                                                                                   | <input type="checkbox"/> _1 Never | <input type="checkbox"/> _2 <1times/week | <input type="checkbox"/> _3 1-2 times/week | <input type="checkbox"/> _4 ≥1times/day | <input type="checkbox"/>          | CONSORAN                           |                                     |                                 |
| Potatoes, sweet potatoes :                                                                                                                                                                                       | <input type="checkbox"/> _1 Never | <input type="checkbox"/> _2 <1times/week | <input type="checkbox"/> _3 1-2 times/week | <input type="checkbox"/> _4 ≥1times/day | <input type="checkbox"/>          | CONSPOT                            |                                     |                                 |
| Vegetables :                                                                                                                                                                                                     | <input type="checkbox"/> _1 Never | <input type="checkbox"/> _2 <1times/week | <input type="checkbox"/> _3 1-2 times/week | <input type="checkbox"/> _4 ≥1times/day | <input type="checkbox"/>          | CONSVEG                            |                                     |                                 |
| Millet :                                                                                                                                                                                                         | <input type="checkbox"/> _1 Never | <input type="checkbox"/> _2 <1times/week | <input type="checkbox"/> _3 1-2 times/week | <input type="checkbox"/> _4 ≥1times/day | <input type="checkbox"/>          | CONSMIL                            |                                     |                                 |
| Sorghum :                                                                                                                                                                                                        | <input type="checkbox"/> _1 Never | <input type="checkbox"/> _2 <1times/week | <input type="checkbox"/> _3 1-2 times/week | <input type="checkbox"/> _4 ≥1times/day | <input type="checkbox"/>          | CONSSORG                           |                                     |                                 |
| Maize :                                                                                                                                                                                                          | <input type="checkbox"/> _1 Never | <input type="checkbox"/> _2 <1times/week | <input type="checkbox"/> _3 1-2 times/week | <input type="checkbox"/> _4 ≥1times/day | <input type="checkbox"/>          | CONSMAIS                           |                                     |                                 |
| Rice :                                                                                                                                                                                                           | <input type="checkbox"/> _1 Never | <input type="checkbox"/> _2 <1times/week | <input type="checkbox"/> _3 1-2 times/week | <input type="checkbox"/> _4 ≥1times/day | <input type="checkbox"/>          | CONSRICE                           |                                     |                                 |
| Wheat (bread, pasta) :                                                                                                                                                                                           | <input type="checkbox"/> _1 Never | <input type="checkbox"/> _2 <1times/week | <input type="checkbox"/> _3 1-2 times/week | <input type="checkbox"/> _4 ≥1times/day | <input type="checkbox"/>          | CONSWHEA                           |                                     |                                 |
| Nuts (Cashew, ground nut) :                                                                                                                                                                                      | <input type="checkbox"/> _1 Never | <input type="checkbox"/> _2 <1times/week | <input type="checkbox"/> _3 1-2 times/week | <input type="checkbox"/> _4 ≥1times/day | <input type="checkbox"/>          | CONSNOT                            |                                     |                                 |
| Prawns, dried oysters :                                                                                                                                                                                          | <input type="checkbox"/> _1 Never | <input type="checkbox"/> _2 <1times/week | <input type="checkbox"/> _3 1-2 times/week | <input type="checkbox"/> _4 ≥1times/day | <input type="checkbox"/>          | CONSPRAWN                          |                                     |                                 |
| Flavouring cubes Maggi :                                                                                                                                                                                         | <input type="checkbox"/> _1 Never | <input type="checkbox"/> _2 <1times/week | <input type="checkbox"/> _3 1-2 times/week | <input type="checkbox"/> _4 ≥1times/day | <input type="checkbox"/>          | CONSCUBE                           |                                     |                                 |
| Other :                                                                                                                                                                                                          | <input type="checkbox"/> _1 Never | <input type="checkbox"/> _2 <1times/week | <input type="checkbox"/> _3 1-2 times/week | <input type="checkbox"/> _4 ≥1times/day | <input type="checkbox"/>          | OTHALCON                           |                                     |                                 |
| If other, define : .....                                                                                                                                                                                         |                                   |                                          |                                            |                                         | <input type="checkbox"/>          | NAMEOTHAL                          |                                     |                                 |
| <b><u>HISTORICAL SYMPTOMATOLOGY OF ALLERGIC REACTIONS</u></b>                                                                                                                                                    |                                   |                                          |                                            |                                         |                                   |                                    |                                     |                                 |
| <b><u>Asthma :</u></b>                                                                                                                                                                                           |                                   |                                          |                                            |                                         |                                   |                                    |                                     |                                 |
| 1. Has a doctor or nurse <b>already</b> said that your child has asthma ?                                                                                                                                        |                                   |                                          |                                            |                                         | <input type="checkbox"/>          | ASTHMA                             |                                     |                                 |
|                                                                                                                                                                                                                  |                                   |                                          |                                            |                                         | <input type="checkbox"/> _0 No    | <input type="checkbox"/> _1 Yes    | <input type="checkbox"/> _9 NSP     |                                 |
| 2. Has your child already breathed noisily or had whistling in his chest whilst breathing                                                                                                                        |                                   |                                          |                                            |                                         | <input type="checkbox"/>          | WHISTLING                          |                                     |                                 |
|                                                                                                                                                                                                                  |                                   |                                          |                                            |                                         | <input type="checkbox"/> _0 No    | <input type="checkbox"/> _1 Yes    | <input type="checkbox"/> _9 NSP     |                                 |
| If <b>No</b> , go directly to question 6                                                                                                                                                                         |                                   |                                          |                                            |                                         | <input type="checkbox"/>          | WHISTLING                          |                                     |                                 |
| 3. During his first two years of life, has your child already breathed noisily or had whistling in his chest whilst breathing ?                                                                                  |                                   |                                          |                                            |                                         | <input type="checkbox"/>          | WHISTL2YR                          |                                     |                                 |
|                                                                                                                                                                                                                  |                                   |                                          |                                            |                                         | <input type="checkbox"/> _0 No    | <input type="checkbox"/> _1 Yes    | <input type="checkbox"/> _9 NSP     |                                 |
| If <b>No</b> , go directly to question 6                                                                                                                                                                         |                                   |                                          |                                            |                                         | <input type="checkbox"/>          | WHISTL2YR                          |                                     |                                 |
| If <b>Yes</b> , how many times (before 2 years of age) ?                                                                                                                                                         |                                   |                                          |                                            |                                         | <input type="checkbox"/>          | NBWHIS2YR                          |                                     |                                 |
|                                                                                                                                                                                                                  |                                   |                                          |                                            |                                         | <input type="checkbox"/> _1 1time | <input type="checkbox"/> _2 2times | <input type="checkbox"/> _3 ≥3times | <input type="checkbox"/> _9 NSP |
| Between the last two <b>ramadans</b> , has your child already breathed noisily or had whistling in his chest whilst breathing ?                                                                                  |                                   |                                          |                                            |                                         | <input type="checkbox"/>          | WHISTL2RA                          |                                     |                                 |
|                                                                                                                                                                                                                  |                                   |                                          |                                            |                                         | <input type="checkbox"/> _0 No    | <input type="checkbox"/> _1 Yes    | <input type="checkbox"/> _9 NSP     |                                 |
| If <b>No</b> , go directly to question 5                                                                                                                                                                         |                                   |                                          |                                            |                                         | <input type="checkbox"/>          | WHISTL2RA                          |                                     |                                 |
| If <b>Yes</b> , at which moment of the year ?                                                                                                                                                                    |                                   |                                          |                                            |                                         | <input type="checkbox"/>          | WHISTLRS                           |                                     |                                 |
| Rainy season :                                                                                                                                                                                                   |                                   |                                          |                                            |                                         | <input type="checkbox"/> _0 No    | <input type="checkbox"/> _1 Yes    | <input type="checkbox"/> _9 NSP     |                                 |
| Dry season :                                                                                                                                                                                                     |                                   |                                          |                                            |                                         | <input type="checkbox"/> _0 No    | <input type="checkbox"/> _1 Yes    | <input type="checkbox"/> _9 NSP     |                                 |
| Harvest time :                                                                                                                                                                                                   |                                   |                                          |                                            |                                         | <input type="checkbox"/> _0 No    | <input type="checkbox"/> _1 Yes    | <input type="checkbox"/> _9 NSP     |                                 |
| Has the noisy breathing of your child been such that it has prevented him from talking normally?                                                                                                                 |                                   |                                          |                                            |                                         | <input type="checkbox"/>          | PREVTALK                           |                                     |                                 |
|                                                                                                                                                                                                                  |                                   |                                          |                                            |                                         | <input type="checkbox"/> _0 No    | <input type="checkbox"/> _1 Yes    | <input type="checkbox"/> _9 NSP     |                                 |
| Has your child already had a rasping cough at night that prevents him from sleeping normally ?                                                                                                                   |                                   |                                          |                                            |                                         | <input type="checkbox"/>          | TOUSECHE                           |                                     |                                 |
|                                                                                                                                                                                                                  |                                   |                                          |                                            |                                         | <input type="checkbox"/> _0 No    | <input type="checkbox"/> _1 Yes    | <input type="checkbox"/> _9 NSP     |                                 |
| <b><u>Rhinitis and allergic conjunctivitis:</u></b>                                                                                                                                                              |                                   |                                          |                                            |                                         |                                   |                                    |                                     |                                 |
| 1. Has your child <b>already had</b> problems of a runny nose, <b>or</b> a sensation of a blocked nose, <b>or</b> an itchy nose, <b>or</b> sneezing, or loss of the sense of smell <b>for more than a week</b> , |                                   |                                          |                                            |                                         | <input type="checkbox"/>          |                                    |                                     |                                 |

|                                                                                                                                                                                                                                                                            |                                                                                       |                          |            |
|----------------------------------------------------------------------------------------------------------------------------------------------------------------------------------------------------------------------------------------------------------------------------|---------------------------------------------------------------------------------------|--------------------------|------------|
| irrespective of the frequency of these episodes?                                                                                                                                                                                                                           | <input type="checkbox"/> No <input type="checkbox"/> Yes <input type="checkbox"/> NSP | <input type="checkbox"/> | RHIN1WEEK  |
| 2. Has your child <b>already had</b> problems of a runny nose, <b>or</b> a sensation of a blocked nose, <b>or</b> an itchy nose, <b>or</b> sneezing, or loss of the sense of smell <b>more than 5 times in one year</b> , irrespective of the frequency of these episodes? | <input type="checkbox"/> No <input type="checkbox"/> Yes <input type="checkbox"/> NSP | <input type="checkbox"/> | RHIN5FAN   |
| Between the <b>last two ramadans</b> , has your child <b>already had</b> problems of a runny nose, <b>or</b> a sensation of a blocked nose, <b>or</b> an itchy nose, <b>or</b> sneezing, or loss of the sense of smell ?                                                   | <input type="checkbox"/> No <input type="checkbox"/> Yes <input type="checkbox"/> NSP | <input type="checkbox"/> | RHIN2RAM   |
| If <b>No</b> , go to question 4                                                                                                                                                                                                                                            |                                                                                       |                          |            |
| If <b>Yes</b> , at what moment of the year ?                                                                                                                                                                                                                               |                                                                                       |                          |            |
| Rainy season :                                                                                                                                                                                                                                                             | <input type="checkbox"/> No <input type="checkbox"/> Yes <input type="checkbox"/> NSP | <input type="checkbox"/> | RHINRS     |
| Dry season :                                                                                                                                                                                                                                                               | <input type="checkbox"/> No <input type="checkbox"/> Yes <input type="checkbox"/> NSP | <input type="checkbox"/> | RHINDS     |
| Harvest time :                                                                                                                                                                                                                                                             | <input type="checkbox"/> No <input type="checkbox"/> Yes <input type="checkbox"/> NSP | <input type="checkbox"/> | RHINHT     |
| 3. Has your child <b>already had</b> watery eyes, <b>or</b> itchy eyes, <b>or</b> an allergic limbo-conjunctivitis?                                                                                                                                                        | <input type="checkbox"/> No <input type="checkbox"/> Yes <input type="checkbox"/> NSP | <input type="checkbox"/> | CONJALER   |
| If <b>No</b> , go directly to question 1 in the section <b>Eczema</b>                                                                                                                                                                                                      |                                                                                       |                          |            |
| Has your child had, between the <b>last two ramadans</b> , watery eyes, <b>or</b> itchy eyes, <b>or</b> an allergic limbo-conjunctivitis?                                                                                                                                  | <input type="checkbox"/> No <input type="checkbox"/> Yes <input type="checkbox"/> NSP | <input type="checkbox"/> | CONJ2RAM   |
| If <b>No</b> , go directly to question 5                                                                                                                                                                                                                                   |                                                                                       |                          |            |
| If <b>Yes</b> , at what moment of the year ?                                                                                                                                                                                                                               |                                                                                       |                          |            |
| Rainy season :                                                                                                                                                                                                                                                             | <input type="checkbox"/> No <input type="checkbox"/> Yes <input type="checkbox"/> NSP | <input type="checkbox"/> | CONJRS     |
| Dry season :                                                                                                                                                                                                                                                               | <input type="checkbox"/> No <input type="checkbox"/> Yes <input type="checkbox"/> NSP | <input type="checkbox"/> | CONJDS     |
| Harvest time :                                                                                                                                                                                                                                                             | <input type="checkbox"/> No <input type="checkbox"/> Yes <input type="checkbox"/> NSP | <input type="checkbox"/> | CONJHT     |
| <b><u>Eczéma :</u></b>                                                                                                                                                                                                                                                     |                                                                                       |                          |            |
| Has your child <b>already had</b> skin problems with dry patches or seeping cracked patches and itching ?                                                                                                                                                                  | <input type="checkbox"/> No <input type="checkbox"/> Yes <input type="checkbox"/> NSP | <input type="checkbox"/> | ECZEMA     |
| If <b>No</b> , the questionnaire has finished.                                                                                                                                                                                                                             |                                                                                       |                          |            |
| Between the <b>last two ramadans</b> , has your child had skin problems with dry patches or seeping cracked patches and itching ??                                                                                                                                         | <input type="checkbox"/> No <input type="checkbox"/> Yes <input type="checkbox"/> NSP | <input type="checkbox"/> | ECZE2RAM   |
| If <b>No</b> , go directly to question 3                                                                                                                                                                                                                                   |                                                                                       |                          |            |
| If <b>Yes</b> , at what moment of the year ?                                                                                                                                                                                                                               |                                                                                       |                          |            |
| Rainy season :                                                                                                                                                                                                                                                             | <input type="checkbox"/> No <input type="checkbox"/> Yes <input type="checkbox"/> NSP | <input type="checkbox"/> | ECZEMARS   |
| Dry season :                                                                                                                                                                                                                                                               | <input type="checkbox"/> No <input type="checkbox"/> Yes <input type="checkbox"/> NSP | <input type="checkbox"/> | ECZEMADS   |
| Harvest time :                                                                                                                                                                                                                                                             | <input type="checkbox"/> No <input type="checkbox"/> Yes <input type="checkbox"/> NSP | <input type="checkbox"/> | ECZEMAHT   |
| 1. Have these skin problems affected different parts of the body of your child ?                                                                                                                                                                                           |                                                                                       |                          |            |
| Scalp :                                                                                                                                                                                                                                                                    | <input type="checkbox"/> No <input type="checkbox"/> Yes <input type="checkbox"/> NSP | <input type="checkbox"/> | ECZESCALP  |
| Face :                                                                                                                                                                                                                                                                     | <input type="checkbox"/> No <input type="checkbox"/> Yes <input type="checkbox"/> NSP | <input type="checkbox"/> | ECZEFAC    |
| Around the eyes and ears :                                                                                                                                                                                                                                                 | <input type="checkbox"/> No <input type="checkbox"/> Yes <input type="checkbox"/> NSP | <input type="checkbox"/> |            |
| Armpits :                                                                                                                                                                                                                                                                  | <input type="checkbox"/> No <input type="checkbox"/> Yes <input type="checkbox"/> NSP | <input type="checkbox"/> | ECZEEYEEAR |

For peer review only - <http://bmjopen.bmj.com/site/about/guidelines.xhtml>

## STROBE Statement—checklist of items included in reports of observational studies

|                           | Item No | Recommendation                                                                                                                                                                                                                                                                                                                                                                                                                                                                                                                                                    |
|---------------------------|---------|-------------------------------------------------------------------------------------------------------------------------------------------------------------------------------------------------------------------------------------------------------------------------------------------------------------------------------------------------------------------------------------------------------------------------------------------------------------------------------------------------------------------------------------------------------------------|
| <b>Title and abstract</b> | 1       | (a) Indicate the study's design with a commonly used term in the title or the abstract<br>(b) Provide in the abstract an informative and balanced summary of what was done and what was found                                                                                                                                                                                                                                                                                                                                                                     |
| <b>Introduction</b>       |         |                                                                                                                                                                                                                                                                                                                                                                                                                                                                                                                                                                   |
| Background/rationale      | 2       | Explain the scientific background and rationale for the investigation being reported                                                                                                                                                                                                                                                                                                                                                                                                                                                                              |
| Objectives                | 3       | State specific objectives, including any prespecified hypotheses                                                                                                                                                                                                                                                                                                                                                                                                                                                                                                  |
| <b>Methods</b>            |         |                                                                                                                                                                                                                                                                                                                                                                                                                                                                                                                                                                   |
| Study design              | 4       | Present key elements of study design early in the paper                                                                                                                                                                                                                                                                                                                                                                                                                                                                                                           |
| Setting                   | 5       | Describe the setting, locations, and relevant dates, including periods of recruitment, exposure, follow-up, and data collection                                                                                                                                                                                                                                                                                                                                                                                                                                   |
| Participants              | 6       | (a) <i>Cohort study</i> —Give the eligibility criteria, and the sources and methods of selection of participants. Describe methods of follow-up<br><i>Cross-sectional study</i> —Give the eligibility criteria, and the sources and methods of selection of participants<br>(b) <i>Cohort study</i> —For matched studies, give matching criteria and number of exposed and unexposed                                                                                                                                                                              |
| Variables                 | 7       | Clearly define all outcomes, exposures, predictors, potential confounders, and effect modifiers. Give diagnostic criteria, if applicable                                                                                                                                                                                                                                                                                                                                                                                                                          |
| Data sources/measurement  | 8*      | For each variable of interest, give sources of data and details of methods of assessment (measurement). Describe comparability of assessment methods if there is more than one group                                                                                                                                                                                                                                                                                                                                                                              |
| Bias                      | 9       | Describe any efforts to address potential sources of bias                                                                                                                                                                                                                                                                                                                                                                                                                                                                                                         |
| Study size                | 10      | Explain how the study size was arrived at                                                                                                                                                                                                                                                                                                                                                                                                                                                                                                                         |
| Quantitative variables    | 11      | Explain how quantitative variables were handled in the analyses. If applicable, describe which groupings were chosen and why                                                                                                                                                                                                                                                                                                                                                                                                                                      |
| Statistical methods       | 12      | (a) Describe all statistical methods, including those used to control for confounding<br>(b) Describe any methods used to examine subgroups and interactions<br>(c) Explain how missing data were addressed<br>(d) <i>Cohort study</i> —If applicable, explain how loss to follow-up was addressed<br><i>Case-control study</i> —If applicable, explain how matching of cases and controls was addressed<br><i>Cross-sectional study</i> —If applicable, describe analytical methods taking account of sampling strategy<br>(e) Describe any sensitivity analyses |

Continued on next page

Results

|                  |     |                                                                                                                                                                                                                                                                                                                                                                                                               |
|------------------|-----|---------------------------------------------------------------------------------------------------------------------------------------------------------------------------------------------------------------------------------------------------------------------------------------------------------------------------------------------------------------------------------------------------------------|
| Participants     | 13* | (a) Report numbers of individuals at each stage of study—eg numbers potentially eligible, examined for eligibility, confirmed eligible, included in the study, completing follow-up, and analysed<br>(b) Give reasons for non-participation at each stage<br>(c) Consider use of a flow diagram                                                                                                               |
| Descriptive data | 14* | (a) Give characteristics of study participants (eg demographic, clinical, social) and information on exposures and potential confounders<br>(b) Indicate number of participants with missing data for each variable of interest<br>(c) Cohort study—Summarise follow-up time (eg, average and total amount)                                                                                                   |
| Outcome data     | 15* | Cohort study—Report numbers of outcome events or summary measures over time<br>Case-control study—Report numbers in each exposure category, or summary measures of exposure<br>Cross-sectional study—Report numbers of outcome events or summary measures                                                                                                                                                     |
| Main results     | 16  | (a) Give unadjusted estimates and, if applicable, confounder-adjusted estimates and their precision (eg, 95% confidence interval). Make clear which confounders were adjusted for and why they were included<br>(b) Report category boundaries when continuous variables were categorized<br>(c) If relevant, consider translating estimates of relative risk into absolute risk for a meaningful time period |
| Other analyses   | 17  | Report other analyses done—eg analyses of subgroups and interactions, and sensitivity analyses                                                                                                                                                                                                                                                                                                                |

Discussion

|                  |    |                                                                                                                                                                            |
|------------------|----|----------------------------------------------------------------------------------------------------------------------------------------------------------------------------|
| Key results      | 18 | Summarise key results with reference to study objectives                                                                                                                   |
| Limitations      | 19 | Discuss limitations of the study, taking into account sources of potential bias or imprecision. Discuss both direction and magnitude of any potential bias                 |
| Interpretation   | 20 | Give a cautious overall interpretation of results considering objectives, limitations, multiplicity of analyses, results from similar studies, and other relevant evidence |
| Generalisability | 21 | Discuss the generalisability (external validity) of the study results                                                                                                      |

Other information

|         |    |                                                                                                                                                               |
|---------|----|---------------------------------------------------------------------------------------------------------------------------------------------------------------|
| Funding | 22 | Give the source of funding and the role of the funders for the present study and, if applicable, for the original study on which the present article is based |
|---------|----|---------------------------------------------------------------------------------------------------------------------------------------------------------------|

\*Give information separately for cases and controls in case-control studies and, if applicable, for exposed and unexposed groups in cohort and cross-sectional studies.

**Note:** An Explanation and Elaboration article discusses each checklist item and gives methodological background and published examples of transparent reporting. The STROBE checklist is best used in conjunction with this article (freely available on the Web sites of PLoS Medicine at <http://www.plosmedicine.org/>, Annals of Internal Medicine at <http://www.annals.org/>, and Epidemiology at <http://www.epidem.com/>). Information on the STROBE Initiative is available at [www.strobe-statement.org](http://www.strobe-statement.org).



**Asthma and atopic dermatitis are associated with increased risk of clinical Plasmodium falciparum malaria**

|                                 |                                                                                                                                                                                                                                                                                                                                                                                                                                                                                                                                                       |
|---------------------------------|-------------------------------------------------------------------------------------------------------------------------------------------------------------------------------------------------------------------------------------------------------------------------------------------------------------------------------------------------------------------------------------------------------------------------------------------------------------------------------------------------------------------------------------------------------|
| Journal:                        | <i>BMJ Open</i>                                                                                                                                                                                                                                                                                                                                                                                                                                                                                                                                       |
| Manuscript ID:                  | bmjopen-2013-002835.R1                                                                                                                                                                                                                                                                                                                                                                                                                                                                                                                                |
| Article Type:                   | Research                                                                                                                                                                                                                                                                                                                                                                                                                                                                                                                                              |
| Date Submitted by the Author:   | 30-Apr-2013                                                                                                                                                                                                                                                                                                                                                                                                                                                                                                                                           |
| Complete List of Authors:       | Herrant, Magali; Institut Pasteur, Loucoubar, Cheikh; Institut Pasteur, Bassene, Hubert; Institut de Recherche pour le Développement, Goncalves, Bronner; Institut Pasteur, Boufkhed, Sabah; Institut Pasteur, Diene Sarr, Fatoumata; Institut Pasteur de Dakar, Fontanet, Arnaud; Institut Pasteur, Tall, Adama; Institut Pasteur de Dakar, Baril, Laurence; Institut Pasteur de Dakar, Mercereau-Puijalon, Odile; Institut Pasteur, Mecheri, Salaheddine; Institut Pasteur, Sakuntabhai, Anavaj; Institut Pasteur, Paul, Richard; Institut Pasteur, |
| <b>Primary Subject Heading</b>: | Epidemiology                                                                                                                                                                                                                                                                                                                                                                                                                                                                                                                                          |
| Secondary Subject Heading:      | Epidemiology, Immunology (including allergy), Infectious diseases                                                                                                                                                                                                                                                                                                                                                                                                                                                                                     |
| Keywords:                       | Allergy < THORACIC MEDICINE, Asthma < THORACIC MEDICINE, Epidemiology < INFECTIOUS DISEASES                                                                                                                                                                                                                                                                                                                                                                                                                                                           |
|                                 |                                                                                                                                                                                                                                                                                                                                                                                                                                                                                                                                                       |

SCHOLARONE™  
Manuscripts

**Asthma and atopic dermatitis are associated with increased risk of clinical *Plasmodium falciparum* malaria**

Magali Herrant<sup>1,2</sup> *scientist*, Cheikh Loucoubar<sup>1,2,3,4</sup> *scientist*, Hubert Bassène<sup>5</sup> *scientist*, Bronner Gonçalves<sup>2</sup> MD, Sabah Boufkhed<sup>2</sup> *scientist*, Fatoumata Diene Sarr<sup>2</sup> MD, Arnaud Fontanet<sup>6,7</sup> MD, Adama Tall<sup>2</sup> *scientist*, Laurence Baril<sup>2</sup> MD, Odile Mercereau-Puijalon<sup>8</sup> *scientist*, Salaheddine Mécheri<sup>9</sup> *scientist*, Anavaj Sakuntabhai<sup>1,10</sup> *scientist*, Richard Paul<sup>1</sup> *scientist*

- <sup>1</sup> Institut Pasteur, Unité de la Génétique Fonctionnelle des Maladies Infectieuses, CNRS URA3012, 28 rue du Docteur Roux, F-75724, Paris cedex 15, France.
- <sup>2</sup> Institut Pasteur de Dakar, Unité d'Epidémiologie des Maladies Infectieuses, Dakar, Senegal.
- <sup>3</sup> INSERM, U946, Genetic Variation and Human Diseases Unit, F-75010, Paris, France.
- <sup>4</sup> Université Paris Diderot, Sorbonne Paris Cité, Institut Universitaire d'Hématologie, F-75010, Paris, France.
- <sup>5</sup> Institut de Recherche pour le Développement (IRD), Unité de Recherche sur les Maladies Infectieuses et Tropicales Emergentes, URMITE CNRS-IRD 198 UMR 6236, Dakar, Sénégal
- <sup>6</sup> Institut Pasteur, Unité d'Epidémiologie des Maladies Emergentes, 25 rue du Docteur Roux, F-75724, Paris cedex 15, France.
- <sup>7</sup> Conservatoire National des Arts et Métiers, 292 rue Saint Martin, Paris 75003, France
- <sup>8</sup> Institut Pasteur, Unité d'Immunologie Moléculaire des Parasites, CNRS URA2581, Paris, France.
- <sup>9</sup> Institut Pasteur, Unité de Biologie des Interactions Hôte Parasite, 25 rue du Docteur Roux, F-75724, Paris cedex 15, France.
- <sup>10</sup> Complex Systems group, Faculty of Science, Mahidol University, Bangkok, Thailand.

**Correspondance to:** Richard Paul, Institut Pasteur, Unité de la Génétique Fonctionnelle des Maladies Infectieuses, 28 rue du Docteur Roux, 75724 Paris cedex 15, France.  
richard.paul@pasteur.fr

## Article summary

### Article focus

- Genetic studies suggest a link between susceptibility to allergy and malaria in Africa
- We hypothesize that atopy increases susceptibility to malaria

### Key messages

- Results demonstrate an association between asthma, atopic dermatitis and susceptibility to clinical *P. falciparum* episodes.
- Genetic pre-disposition to asthma or atopic dermatitis impairs the acquisition of clinical immunity to malaria.
- Administration of anti-histamines to atopic children will likely reduce the burden of clinical malaria in these children, increase the efficacy of first-line treatment anti-malarials and alleviate the non-infectious consequences of atopy.

### Strengths and limitations

The major strength of this study is the complete knowledge of the number of clinical *P. falciparum* malaria episodes each individual has had since birth and the exposure level per trimester over the 15 years covering the birth cohort. No other study has such detailed information for such a length of time. The major weakness of the study is the relatively small sample size, which would have reduced power to detect an association.

1  
2  
3  
4  
5  
6  
7  
8  
9  
10  
11  
12  
13  
14  
15  
16  
17  
18  
19  
20  
21  
22  
23  
24  
25  
26  
27  
28  
29  
30  
31  
32  
33  
34  
35  
36  
37  
38  
39  
40  
41  
42  
43  
44  
45  
46  
47  
48  
49  
50  
51  
52  
53  
54  
55  
56  
57  
58  
59  
60

**Abstract**

**Objectives:** To assess the impact of atopy and allergy on the risk of clinical malaria.

**Design:** A clinical and immunological allergy cross-sectional survey in a birth cohort of 175 children from 1 month to 14 years of age followed for up to 15 years in a longitudinal open cohort study of malaria in Senegal. Malaria incidence data were available for 143 of these children (aged 4 months to 14 years of age) for up to 15 years. Mixed model regression analysis was used to determine the impact of allergy status on malaria incidence, adjusting for age, sickle cell trait and force of infection.

**Main outcome measures:** Asthma, allergic rhinoconjunctivitis and atopic dermatitis status, the number of clinical *Plasmodium falciparum* malaria episodes since birth and associated parasite density.

**Results:** Twelve percent of the children were classified as asthmatic and ten percent as having atopic dermatitis. These groups had respectively a two-fold (OR 2.12 95% confidence intervals 1.46 to 3.08;  $P= 8 \times 10^{-5}$ ) and three-fold (OR 3.15, 1.56 to 6.33;  $P= 1.3 \times 10^{-3}$ ) increase in the risk of clinical *P. falciparum* malaria once older than the age of peak incidence of clinical malaria (3 to 4 years of age). They also presented with higher *P. falciparum* parasite densities (Asthma: mean 105.3 parasites/ $\mu$ L  $\pm$ SE 41.0 vs. 51.3  $\pm$ 9.7;  $P= 6.2 \times 10^{-3}$ ; Atopic dermatitis: 135.4  $\pm$ 70.7 vs. 52.3  $\pm$ 11.0;  $P=0.014$ ). There was no effect of allergy on the number of non-malaria clinical presentations. Individuals with allergic rhinoconjunctivitis did not have an increased risk of clinical malaria nor any difference in parasite densities.

**Conclusion:** These results demonstrate that asthma and atopic dermatitis delay the development of clinical immunity to *P. falciparum*. Despite the encouraging decrease in malaria incidence rates in Africa, a significant concern is the extent to which the increase in allergy will exacerbate the burden of malaria. Given the demonstrated anti-parasitic effect of anti-histamines, administration to atopic children will likely reduce the burden of clinical malaria in these children, increase the efficacy of first-line treatment anti-malarials and alleviate the non-infectious consequences of atopy.

## Introduction

The World Allergy Organization estimates that 40% of the world's population is concerned by allergic diseases.<sup>1</sup> In developing countries where *Plasmodium falciparum* malaria is endemic, prevalence of allergy is significantly lower, but is on the increase.<sup>2</sup> Orientation of the immune response towards a Th1 profile is crucial for immunity to intracellular pathogens,<sup>3</sup> whereas orientation towards a Th2 profile drives immunity to extracellular pathogens and antigens resulting in class switching giving rise to IgE-producing B cells.<sup>4</sup> An important role of the Th1/Th2 balance in the development of clinical malaria following infection by *P. falciparum* has been suggested by numerous studies.<sup>5-7</sup> It has been suggested that the Th2 bias induced by *P. falciparum* may exacerbate allergy.<sup>8</sup> Likewise, an atopic state may generate a tendency to develop a Th2 type immune response to *P. falciparum*. However, the interplay between infectious agents and allergy is unclear. On the one hand, for example, severe respiratory syncytial virus infection in infants increased the risk of allergic rhinoconjunctivitis and allergic asthma.<sup>9,10</sup> On the other hand, measles,<sup>11</sup> hepatitis A<sup>12</sup> and tuberculosis<sup>13</sup> seemingly reduce atopy. Although, an atopic condition can increase incidence of disease, such as the case for the skin commensal *Staphylococcus aureus* in patients with atopic dermatitis,<sup>14</sup> an atopic tendency *per se* does not generally lead to increased illness from infectious agents.

Genome wide studies have identified chromosomal regions linked to clinical malaria, all of which overlap with those previously identified to be involved in atopic dermatitis, asthma, atopy and IgE levels,<sup>15-17</sup> suggesting that common mechanisms may be involved in both pathologies.<sup>18</sup> Chromosomal region 5q31 that has been repeatedly shown to be associated with control of parasite density and contains a cluster of cytokines, among which IL12B has been previously associated with psoriasis.<sup>19</sup> The other regions, 13q13-q22, 5p15-p13 and 12q21-q23, contain genes involved in innate immunity, notably the interleukin 7 receptor, and several involved in tumour necrosis factor synthesis [C1q and tumour necrosis factor related protein 3 (C1QTNF3)] and a gene involved in the complement system (C9).<sup>18</sup>

Several additional lines of evidence support the concept that susceptibility to malaria and atopy may be related to similar immunological defects. In Ethiopia, a history of malaria was associated with atopy.<sup>20</sup> A mouse model for human atopic disease was found to be very susceptible to murine malaria and a major locus for atopic disease mapped close to the

region controlling parasite density.<sup>21</sup> This region contains several candidate genes that have effects on T-cell function.<sup>21</sup>

Moreover, a direct effect of histamine in the malaria pathogenesis has been found using genetic and pharmacological approaches<sup>22</sup> and increased levels of histamine are associated with the severity of disease in humans infected with *P. falciparum* and in animal malaria models.<sup>23,24</sup>

To test the hypothesis that allergy impacts upon clinical *P. falciparum* malaria, we performed a clinical allergy cross-sectional study in the family-based longitudinal cohort from Senegal previously used for the genome linkage study<sup>18</sup> and analysed the impact of asthma, atopic dermatitis, allergic rhinoconjunctivitis on the incidence of clinical *P. falciparum* episodes and the maximum parasite density during each episode.

**Methods**

**Population and outcome data**

The malaria research program conducted in Dielmo village in Senegal has been ongoing since 1990 as described elsewhere.<sup>25</sup> In brief, between 1990 and 2008, a longitudinal study involving the inhabitants of the village of Dielmo, Senegal, was carried out to identify all episodes of fever. The study design included daily medical surveillance with systematic blood testing of individuals with fever and examination of 200 oil-immersion fields on a thick blood film for malaria parasites (about 0.5 µL of blood). Each individual was given a unique identification code and details of family ties, occupation, and precise place of residence were recorded on detailed maps of each household with the location of each bedroom. All households were visited daily, absenteeism recorded, and the presence of fever or other symptoms assessed. We systematically recorded body temperature at home three times a week (every second day) in children younger than 5 years, and in older children and adults in cases of suspected fever or fever-related symptoms. In cases of fever or other symptoms, blood testing was done at the dispensary by finger prick, and we provided detailed medical examination and specific treatment. Parasitologically confirmed clinical malaria episodes were treated according to national guidelines. From 1990 to 2008, four different drug regimens were implemented: Quinine from 1990 to 1994, Chloroquine from 1995 to 2003,

Fansidar (sulfadoxine-pyrimethamine) from 2004 to mid-2006 and Artemisinin-based combination therapy (ACT; Amodiaquine- sulfadoxine-pyrimethamine) from mid-2006 to 2008.

Parasite positivity was established as follows. Thick blood films were prepared and stained by 3% Giemsa stain. Blood films were examined under an oil immersion objective at x1000 magnification by the trained laboratory technicians and 200 thick film fields were examined to count the number of asexual and gametocyte parasite stages. Asexual parasite densities (per  $\mu\text{L}$ ) were calculated by establishing the ratio of parasites to white blood cells and then multiplying the parasite count by 8,000, the average white blood cell count per  $\mu\text{L}$  of blood.

Malaria transmission in Dielmo is intense and perennial. We conducted a cross-sectional survey to estimate the prevalence of symptoms related to allergic diseases among 175 children aged from 1 month to 14 years old who were born during the malaria research program.

Both the longitudinal and cross-sectional surveys were approved by the Ministry of Health of Senegal. Informed consent of the volunteers is renewed every year. More specifically for the cross-sectional survey, after informing about the procedures and the purpose of the study, written informed consent was obtained from parents or guardians of children either by signature or by thumbprint on a voluntary consent form written in both French and Wolof, the main local language. Consent was obtained in the presence of the school director, an independent witness.

The family structure (pedigree) was available after a demographic census performed for every volunteer at his adhesion in the project. A verbal interview of mothers or key representatives of the household was used to obtain information on genetic relationships between studied individuals, their children, their parents, and to identify genetic links among the population. The total pedigree comprised 828 individuals, including absent or dead relatives, composed of ten independent families that can be sub-divided into 206 nuclear families (father – mother couples with at least one child) with an average of 3.6 children each. Genetically related nuclear families occur because of multiple marriages and marriages among related individuals. Previous typing with microsatellites has enabled the construction of a pedigree based on Identity-by-Descent using MERLIN.<sup>18,26</sup> The mean coefficient of inbreeding is 0.0008. Newborns since this original genetic analysis were added

to the family of the parents in question. The 143 children, with both allergy and malaria data, belonged to 61 nuclear families and comprised 30 singletons, 102 siblings and 11 half-sibs (yielding 55 half-sib pairs). The mean genetic relatedness (by pedigree) of the 143 children is 0.0114 (range: 0.0013 to 0.022).

*P. falciparum clinical episodes*

*P. falciparum* malaria clinical episode phenotypes analysed were: (i) clinical *P. falciparum* infections treated with anti-malarial therapy and (ii) the highest parasite density during the *P. falciparum* clinical episode. A clinical *P. falciparum* episode was defined as a clinical presentation with fever (axillary temperature  $\geq 37.5^{\circ}\text{C}$ ) and/or other clinical signs suggestive of malaria associated with a thick blood smear positive for *P. falciparum* and that was treated with anti-malarial therapy. Repeated clinical malaria presentations within 15 consecutive days were not considered to be independent and were excluded from the analyses, unless there was a negative thick blood smear between two clinical presentations. We also excluded observations in any trimester for which the individual was not present for at least one third of the time.

We calculated the quarterly incidence rate of clinical *P. falciparum* episodes in children below the age of 15 years as the ratio of the total number of clinical *P. falciparum* episodes during the trimester divided by the total number of person-trimesters surveyed. Incidence rate is expressed as cases per 100 person-trimesters (see Supplementary Figure S1). This rate was used in the analysis to approximate the force of infection (exposure level) within the targeted population at the time of a given clinical *P. falciparum* episode.

The total number of clinical presentations per trimester that were not attributable to *P. falciparum* was tabulated. Repeated non-malaria presentations within seven consecutive days were not considered to be independent and were excluded.

*Allergic diseases and atopic status*

The International Study of Asthma and Allergies in Childhood (ISAAC) diagnostic criteria have been shown to be reproducible, adequate and able to discriminate children with allergic diseases in different areas of the world.<sup>2</sup> The standardized ISAAC questionnaire originally written in English was translated into French in compliance with ISAAC guidelines<sup>27</sup>, adapting it to the usual local customs following advice from local clinicians and paediatric

allergologists (Acknowledgements and Technical Appendix). The adequacy and reliability of the translated questionnaire had been previously confirmed by a pilot study on 30 randomly selected children in the same community. The questionnaire was completed by specially trained health workers during an oral interview conducted in Wolof with children and their mothers or guardians.

To assess the prevalence of allergic diseases in children, we used the positive and negative predictive values of the ISAAC questionnaire diagnosis criteria developed for subtropical countries.<sup>28</sup> Each question was scored according to the medical diagnosis of paediatricians and paediatric allergologists. Positive or negative answers were thus graded on the basis of symptom sensitivity, specificity, frequency, location or early onset. For each allergic disease, three categories of symptom severity, *severe*, *moderate*, and *none*, were defined as follows:

*Asthma* – *severe* symptoms if the child had “wheezing or whistling in the chest before the age of two years” and “more than three times” or severe enough to “limit his/her speech”; *moderate* symptoms if the child had “wheezing or whistling in the chest before the age of two years” and “in the past 12 months”; and *none* otherwise.

*Allergic rhinoconjunctivitis* – *severe* symptoms if the child had “sneezing, runny or stuffy nose in the past 12 months” and “more than five times a year”, and “itchy, watery eyes or tropical endemic limboconjunctivitis (TELC) in the past 12 months”; *moderate* symptoms if the child had “sneezing, runny or stuffy nose in the past 12 months”, and “itchy, watery eyes or TELC in the past 12 months”; and *none* otherwise.

*Atopic dermatitis* – *severe* symptoms if the child had “scaly or exudating, crusted and pruritic patches in the past 12 months” and “affecting any of the following characteristic areas: face, around the ears or eyes, folds of armpits or elbows or groin, behind the knees, under the buttocks”, and “onset of symptoms before the age of two years”; *moderate* symptoms if the child had “scaly or exudating, crusted and pruritic patches in the past 12 months” and “affecting any of characteristic areas (see above)”, and “onset of symptoms before the age of four years”; and *none* otherwise.

The inter-relationships between variables reflecting the severity of symptoms of the three allergic diseases were used to identify children at high risk of atopy. The *high probability* group was defined by the prevalence of at least one of any *severe* symptoms or two of any

moderate symptoms. The *probable* group was defined as those with *moderate* symptoms from one of the three allergic diseases and remaining children were classified in the *unlikely* group.

*Helminths*

Helminthic infections are common in this region and are known to modify the clinical course and outcome of both allergic diseases and malaria.<sup>29,30</sup> We therefore carried out a helminth survey for 91 individuals present during the cross-sectional survey. Diagnosis was performed by stool examination by microscope and by the Kato technique to search for the presence of *Ascaris lumbricoides*, hookworms (*Ancylostoma duodenale* and *Necator americanus*), whipworm (*Trichuris trichiuria*), *Schistosoma mansoni*, and *Strongyloides stercoralis*. Examination for pinworms (*Enterobius vermicularis*) was performed by the anal scotch-test. An anti-helminthic treatment was proposed for all infested individuals.

*Immunoglobulin E titres*

Specific IgE titres were measured by ELISA as previously described.<sup>31</sup> A panel of allergens of potential pertinence to the three classes of allergy was used: (i) Salivary gland extracts (SGE) of two mosquito species present in the study cohorts, *Aedes aegypti* and *Anopheles gambiae sensu stricto*, and (ii) *P. falciparum* parasite extract were prepared as previously described<sup>31</sup>; (iii) House dust mite spp. *Dermatophagoides farinae* and *Dermatophagoides pteronyssinus*; (iv) a mix of pollen allergens from five ubiquitous gramineae spp. [Cock's-foot (*Dactylis glomerata*), Timothy grass (*Phleum pratense*), Sweet Vernal grass (*Anthoxanthum odoratum*), Perennial ryegrass (*Lolium perenne*), Kentucky Bluegrass (*Poa pratensis*)] (all from Stallergenes, France).

**Statistical analysis**

Statistical analyses were performed using R version 2.12.0 (The R Foundation for Statistical Computing, Vienna, Austria). To address the effect of allergic status on the risk of clinical *P. falciparum* episodes, we performed Generalized Linear Mixed Models (GLMM) extended to pedigree data using the *pedigreemm* package for R to account for the non-independence of individuals because of family relationships, shared house and for repeated measures from the same individual (Technical Appendix). Correlated individual effects due to familial relationships were taken into account by using the pedigree-based genetic relatedness

matrix that contains the genetic covariance among all pairs of individuals in the study cohort and is calculated using the pedigree information.<sup>32</sup> Shared house and repeated measures from the same individual were modelled as random effects. All random effects were assumed to be normally distributed, and conditional on these random effects, the dependent variable had: (i) a Binomial distribution when the studied phenotype was the occurrence of a clinical *P. falciparum* episode treated with anti-malarial therapy during a trimester, (ii) a Gaussian distribution when the studied phenotype was the logarithm of the maximum parasite density during a given clinical *P. falciparum* episode, and (iii) a Poisson distribution when the studied phenotype was the number of non-malaria episodes per trimester. The effects of allergy disease classes on these dependent variables were modelled as fixed effects. Allergy classes were reduced to two levels, *Severe* or *moderate* vs. *none* for analyses of asthma, atopic dermatitis and allergic rhinoconjunctivitis and *high probability* vs. *probable* and *unlikely* for atopic tendency. Co-variables included sickle cell trait<sup>31</sup>, gender, number of days present on site during the trimester, trimestrial incidence of *P. falciparum* and age. Age was initially analysed as a continuous covariate. To assess the age-specific effect of allergy, age was categorised into two levels (<3.5 years of age and ≥3.5 years of age, based on the age of peak clinical incidence) and allergy class was nested within age class. The age threshold was varied from 1.5 years to 5.5 years of age and the data re-analysed to assess at which age there was the strongest effect. The association of allergy classes with IgE levels was analysed by box-cox transforming the data and fitting a GLMM with a normal distribution.

## Results

Of the 205 eligible children aged under 15 years involved in the family-based longitudinal study, 175 (85.4 %) participated in the cross-sectional survey to assess the prevalence of related symptoms of allergic diseases. All eligible children present at the time of the survey were included; no explicit refusal to participate was recorded. The study cohort was aged from 1 month to 14 years 11 months. The sex-ratio (male/female) was 0.94.

From 1994 until 2008, 143 of the children participating in the cross-sectional survey were present for at least 31 days in any trimester during the study period generating a total of

1  
2  
3  
4  
5  
6  
7  
8  
9  
10  
11  
12  
13  
14  
15  
16  
17  
18  
19  
20  
21  
22  
23  
24  
25  
26  
27  
28  
29  
30  
31  
32  
33  
34  
35  
36  
37  
38  
39  
40  
41  
42  
43  
44  
45  
46  
47  
48  
49  
50  
51  
52  
53  
54  
55  
56  
57  
58  
59  
60

3,093 person-trimesters of presence (Supplementary Table S1). There were 2,065 treated *P. falciparum* clinical episodes (median 11, range 0-47)(Supplementary Table S2). The age peak of incidence of *P. falciparum* episodes occurred at 3 to 4 years of age (Figure 1). There were 1,868 non-malaria episodes (median 12, range 0-37) (Table S2). These non-malaria clinical presentations were associated with headache (38 %), chills (32 %), cough (13 %), vomiting (11 %) and diarrhoea (6 %).

The prevalence of moderate or severe asthma symptoms was respectively 2.3 % and 10.3 % (Table 1). The prevalence of moderate or severe allergic rhinoconjunctivitis symptoms was respectively 6.3 % and 10.3 %. The prevalence of moderate or severe atopic dermatitis symptoms was respectively 6.3 % and 2.9 %. On the basis of symptom severity, an atopic tendency was estimated to be unlikely for 68.0 %, probable for 9.1 % and highly probable for 22.9 % of the 175 children. The frequency of each allergy class in children for whom malaria data were available is shown in Table S1.

The risk of treated clinical *P. falciparum* infections was higher for children with high probability of atopy (OR 1.65, 95% confidence intervals 1.20 to 2.26; P=0.002) (Table 2), after adjusting for age, sickle cell trait and the exposure level. Gender was not found to be significant. Analysing the impact of atopy in children younger and older than the peak age of clinical incidence (3 to 4 years old), revealed that atopy increased the risk of *P. falciparum* episodes in children at an age greater than 3.5 years (OR 2.02, 1.39 to 2.93; P=2x10<sup>-4</sup>), but not in children of age prior to the peak clinical incidence (OR 1.38, 0.92 to 2.08; P=0.124) (Table 2). This increased risk resulted in an ever increasing cumulative number of *P. falciparum* episodes with age beyond that of peak clinical incidence (Figure 2. See supplementary Figure S2 for model predictions for comparison).

Analysis by allergy category revealed that asthma (severe or moderate) increases the risk of *P. falciparum* episodes (OR 2.12, 1.46 to 3.08; P= 8 x10<sup>-5</sup>) and this again only in children of age greater than 3.5 years old (OR 2.33, 1.50 to 3.61; P= 1.5 x10<sup>-4</sup>). Atopic dermatitis increased the risk of clinical malaria in children older (OR 3.15, 1.56 to 6.33; P= 1.3 x10<sup>-3</sup>) but not younger than 3.5 years of age (Table 2). Allergic rhinoconjunctivitis was not associated with increased risk of clinical malaria at any age (Table 2). The impact of atopy, asthma and atopic dermatitis can be clearly seen in the ever-increasing number of cumulative *P. falciparum* episodes beyond the age of the onset of clinical immunity in the population, 3.5

years of age (Figure 2). There is no difference in the number of clinical malaria episodes prior to this age in individuals with or without an allergic condition. Analysis using different age thresholds (from 1.5 to 5.5 years of age) revealed similar OR for thresholds of 2.5, 3.5 and 4.5 years of age. The maximum OR for increased malaria occurred in children older than 4.5 years of age and with atopy or atopic dermatitis, whereas for the asthma group it occurred in children after 3.5 years of age (Supplementary Table S3).

There was no impact of any allergic disease on the number of non-malaria episodes by trimester (Supplementary Table S4).

The impact of atopy, asthma and atopic dermatitis on the maximum *P. falciparum* parasite density during a given clinical malaria episode mirrored that of the risk of *P. falciparum* episodes. Parasite density was significantly higher for children with allergic disease older than 3.5 years of age (Table 3 and supplementary Figure S3 for residuals of the fitted model). Allergic rhinoconjunctivitis had no impact on the parasite density (Table 3). Analysis using different age thresholds yielded the same pattern as seen with the number of clinical episodes (Table S3).

Individuals with moderate or severe symptoms of atopic dermatitis had significantly higher specific IgE titres against *Ae. aegypti* ( $P=0.004$ ) and *An. gambiae* SGE ( $P<0.001$ ). There were no detectable specific anti-*P. falciparum* IgE. Individuals with moderate or severe symptoms of allergic rhinoconjunctivitis did not have significantly higher IgE titres against the tested gramineae ( $P=0.28$ ), although titres decreased with age ( $P=0.035$ ). There was also no effect of asthma on IgE titres against the house dust mite spp. tested (*D. farinae*  $P=0.60$  & *D. pteronyssinus*  $P=0.27$ ).

Only five individuals were infested with helminths (two *Ancylostoma*, one *Strongyloides*, one *Trichuris* and one *Enterobius*).

## Discussion

### Principal findings

Establishing the allergic status of children up to the age of 15 years old followed for malaria since birth, revealed an association of asthma and atopic dermatitis with susceptibility to

clinical *P. falciparum* episodes. Importantly the increase in risk of malaria associated with these allergic conditions occurred after the peak clinical incidence of disease in the population, suggesting that they delay the development of clinical immunity to malaria.

**Strengths and weaknesses of the study**

The major strength of this study is the complete knowledge of the number of clinical *P. falciparum* malaria episodes each individual has had since birth and the exposure level per trimester over the 15 years covering the birth cohort. No other study has such detailed information for such a length of time. The major weakness of the study is the relatively small sample size, which would have reduced power to detect an association. In addition, although allergy diagnosis for children under 2 years of age is not considered reliable, there were only 15 individuals under 2 at the time of the allergy study of the 143 for whom malaria and allergy data were available.

**Meaning of the study**

Under intense malaria transmission, after repeated exposure to the parasite, children develop a clinical immunity<sup>33</sup>, whereby they tolerate elevated parasite densities without showing clinical symptoms. In this cohort, the population mean onset of clinical immunity occurred at 3 to 4 years of age. Although clinical immunity is accompanied by a reduction in parasite density, effective anti-parasite immunity develops much more slowly<sup>34</sup> with individuals achieving a state of premunition, whereby they maintain low-grade parasite densities in an asymptomatic state.<sup>35</sup> We show here that children with clinically defined asthma or atopic dermatitis had a two to three-fold increase in the risk of presenting with *P. falciparum* malaria episodes requiring treatment once passing the age of peak clinical incidence. They also had higher parasite density during clinical episodes, suggesting a reduced ability to control parasite replication. The observed increase in clinical incidence of malaria in patients with asthma or atopic dermatitis is not likely to be the result of increased frailty of such individuals; these individuals did not come more frequently to the clinic with non-malaria symptoms. Our previous genome linkage study identifying chromosomal regions<sup>18</sup> associated with malaria that overlap with those previously shown to be linked to asthma/atopy suggests that there may be a shared genetic basis to these pathologies rather than any causative effect of one on the other. This is consistent with the increased susceptibility to malaria of mouse atopic models.<sup>21</sup>

### Comparison with other studies

A previous study found that a history of malaria (yes/no) increased risk of atopic dermatitis in 306 cases compared to 426 controls as characterized using the ISAAC questionnaire.<sup>20</sup> The only other epidemiological study that has previously examined the link between malaria and atopy<sup>36</sup> also interpreted the result from the perspective of the impact of malaria on atopy. They examined the re-infection rate with *P. falciparum* over a 5-year period in 91 children that were subsequently classified as atopic or not using skin prick tests (SPT) with house dust mite antigen. Their conclusion was that, as with measles<sup>11</sup> and tuberculosis<sup>13</sup>, malaria infection reduces atopy. However, the study lacked previous infection data since birth of the participating individuals and focussed on atopy as determined by SPT against a single allergen. The case-control study of atopic dermatitis risk factors cited above found no overall association between allergen skin sensitization and atopic dermatitis. We also found no evidence of increased IgE titres against house dust mites in the asthmatic or atopic dermatitis groups or against grass pollen in individuals with allergic rhinoconjunctivitis. Such differences likely reflect the different IgE reactivity profiles due to differences in allergen exposure in Africa.<sup>37</sup> There was no evidence of anti-parasite IgE in this cohort of children. We previously showed that circulating anti-parasite IgE titres were strongly positively correlated with anti-mosquito saliva IgE, but became undetectable following malaria exposure, potentially being bound to effector cells.<sup>31</sup> Only mosquito saliva, a known major local allergen, induced a specific IgE response at significantly higher titres in individuals with atopic dermatitis.

Although the immune effectors of clinical immunity are still poorly defined, there is strong evidence that acquired anti-parasite immunity is IgG-dependent<sup>38</sup> and cytophilic immunoglobulins (IgG1 & IgG3), which are capable of eliminating the parasites by opsonisation and/or by Antibody Dependent Cellular Immunity play an important role in premunity.<sup>35</sup> The higher parasite density during symptomatic episodes observed in the asthma group suggests impaired development of acquired immunity. Impaired acquisition of immunity to malaria in children with asthma or atopic dermatitis may stem from their imbalanced Th1/Th2 response. Indeed, an atopic state may generate a tendency to develop a Th2 type immune response to *P. falciparum*. Dendritic cells that are oriented to a Th2 phenotype are more susceptible to orient the acquired immune response towards a Th2

profile.<sup>39</sup> Orientation of the immune response towards a Th2 profile by asthma or atopic dermatitis would result in a poor Th1 response (and hence development of protective IgG immunoglobulins), considered to be the dominant arm of the immune response enabling resistance to infectious disease in children.<sup>40</sup>

Many studies have revealed an important role of histamine, a key downstream effector molecule in allergic reaction, in the outcome of a malaria parasite infection.<sup>22-24,41-44</sup> Moreover, reports indicate that components of the innate immune system, including eosinophils, basophils, and mast cells (MCs), could play important roles in the pathogenesis of malaria.<sup>41</sup> Increased levels of histamine in plasma and tissue, derived from basophils and MCs, notably following stimulation by IgE through the high affinity receptor FcεR1, are associated with the severity of disease in humans infected with *P. falciparum* and in animal malaria models.<sup>23,24</sup> Chlorpheniramine, a H1agonist reversed resistance to chloroquine and amodiaquine both *in vivo* and *in vitro*.<sup>42</sup> Moreover, astemizole, another H1 agonist, was identified as an anti-malarial agent in a clinical drug library screen.<sup>43</sup> Finally, *P. falciparum* produces translationally controlled tumor protein, which is a homolog of the mammalian histamine-releasing factor that causes histamine release from human basophils.<sup>44</sup>

**Further research**

Our results provide the first birth cohort study addressing the link between malaria and allergic diseases. They contribute to a growing body of evidence that the pathologies are related. ISAAC has revealed a steady but significant increase in prevalence rates of asthma and allergic diseases in Africa. Whilst the majority of studies have focused on large cities, there is increasing urbanization throughout Africa, as well as improved access to primary health care in many areas. A key concern for ISAAC is the extent to which such societal evolution will result in an increase in allergic diseases. Increased urbanization in sub-Saharan Africa is changing the epidemiology of malaria and although resulting in a decrease in risk, will result in more severe clinical malaria in older individuals.<sup>45,46</sup> Moreover, a large consumption of anti-malarial drugs in the urban areas provides substantial drug pressure fostering, the selection of drug-resistant parasites. Despite the encouraging recent decrease in malaria incidence rates, even in rural areas, an additional significant concern is the extent to which such an increase in allergy will exacerbate the burden of malaria. Given the demonstrated anti-parasitic effect of anti-histamines<sup>47</sup>, administration of anti-histamines to

atopic children will likely reduce the burden of clinical malaria in these children, increase the efficacy of first-line treatment anti-malarials<sup>48</sup> and alleviate the non-infectious consequences of atopy. Clinical intervention studies should be envisaged.

### What is already known on this topic

There are several reports of the beneficial effects of anti-histamines for malaria chemoprophylaxis<sup>22-24,47</sup> as well as our previous work<sup>18</sup> showing that chromosomal regions associated with malaria are also linked to allergy and atopy.<sup>15-17</sup> There are two epidemiological studies showing opposite effects of malaria on atopy.<sup>20,36</sup>

### What this study adds

Using a longitudinal malaria study birth cohort, we identified an association of asthma and atopic dermatitis with susceptibility to clinical *P. falciparum* episodes. Importantly the increase in risk of malaria associated with these allergic conditions occurred only after the peak clinical incidence of disease in the population, suggesting that they delay the development of clinical immunity to malaria.

We are grateful to the villagers of Dielmo for their participation and sustained collaboration in this project as well as the field workers (Abdoulaye Badiane) and the data manager (Joseph Faye) for their contribution to the project and in generating and maintaining the malaria database. We are indebted to Michel Thiakane, a paediatric allergologist, head of the Paediatric Service, Principal hospital, Dakar, Senegal and Marie-Thérèse Guinnepain, dermatologist, Institut Pasteur clinic, Paris, France for aid in elaborating the ISAAC questionnaire and advising on clinical diagnosis of allergy in Senegal. We specially thank the children and parents or guardians who participated in the cross-sectional survey 'Pallergo'. We thank the International Division of the Institut Pasteur that has given full support to this study.

STROBE: This article has been prepared according to the STROBE checklist guidelines.

Funding: Institut Pasteur de Dakar, Institut Pasteur and Agence Nationale de la Recherche, France (ANR 11-BSV1-027-01). The funding source had no role in study design, data collection, data analysis, data interpretation, or writing of the report. The corresponding author had full

access to all the data in the study and had final responsibility for the decision to submit for publication.

Contributors: LB, SM, and RP made substantial contributions to the concept and design of the study. MH, HB, BG, SB, FDS, and AT were involved in acquisition of the data. CL, AF, OMP, AS and RP contributed to the analysis and interpretation of the data. MH, CL, HB, BG, SB, FDS, AF, AT, LB, OMP, SM, AS and RP critically reviewed the report and approved its final version for submission. All authors had full access to all of the data in the study and can take responsibility for the integrity of the data and the accuracy of the data analysis. MH and RP are guarantors.

Competing interests: All authors have completed the ICMJE uniform disclosure form at [www.icmje.org/coi\\_disclosure.pdf](http://www.icmje.org/coi_disclosure.pdf) (available on request from the corresponding author) and declare: no financial relationships with any organisations that might have an interest in the submitted work in the previous three years; no other relationships or activities that could appear to have influenced the submitted work.

Ethical approval: The allergy study was approved by the Senegalese National Ethics committee (2009/N°46). Renewed approval of the longitudinal malaria study was obtained from the same committee (2006/N°969).

Data sharing: The allergy database will be made available on-line. The longitudinal malaria data set will be made available following discussion with the coordinators of the three Institutes that govern the dataset through contact with the corresponding author.

Copyright: The Corresponding Author has the right to grant on behalf of all authors and does grant on behalf of all authors, a worldwide licence to the Publishers and its licensees in perpetuity, in all forms, formats and media (whether known now or created in the future), to i) publish, reproduce, distribute, display and store the Contribution, ii) translate the Contribution into other languages, create adaptations, reprints, include within collections and create summaries, extracts and/or, abstracts of the Contribution, iii) create any other derivative work(s) based on the Contribution, iv) to exploit all subsidiary rights in the Contribution, v) the inclusion of electronic links from the Contribution to third party material where-ever it may be located; and, vi) licence any third party to do any or all of the above.

## References

1. WAO, World Allergy Organization - <http://www.worldallergy.org/index.php>. 2010.
2. Asher MI, Montefort S, Björkstén B, Lai CK, Strachan DP, Weiland SK, et al. Worldwide time trends in the prevalence of symptoms of asthma, allergic rhinoconjunctivitis, and eczema in childhood: ISAAC Phases One and Three repeat multicountry cross-sectional surveys. *Lancet* 2006; 368: 733-43.
3. Mosmann TR, Coffman RL. TH1 and TH2 cells: different patterns of lymphokine secretion lead to different functional properties. *Ann Rev Immunol* 1989; 7: 145–73.
4. Zhu J, Paul WE. CD4 T cells: fates, functions, and faults. *Blood* 2008; 112: 1557–69.
5. Elghazali G, Perlmann H, Rutta AS, Perlmann P, Troye-Blomberg M. Elevated plasma levels of IgE in *Plasmodium falciparum*-primed individuals reflect an increased ratio of IL-4 to interferon-gamma (IFN-gamma)-producing cells. *Clin Exp Immunol* 1997; 109: 84-9.
6. Perlmann P, Perlmann H, ElGhazali G, Blomberg MT. IgE and tumor necrosis factor in malaria infection. *Immunol Lett* 1999; 65: 29-33.
7. Tangteerawatana P, Perlmann H, Hayano M, Kalambaheti T, Troye-Blomberg M, Khusmith S. IL4 gene polymorphism and previous malaria experiences manipulate anti-*Plasmodium falciparum* antibody isotype profiles in complicated and uncomplicated malaria. *Malaria J* 2009 ; 8: 286-95.
8. Taylor-Robinson AW. Malaria-specific IgE as a risk factor for cancer and atopy. *Am J Trop Med Hyg* 1998; 59: 181.
9. Stein RT, Sherrill D, Morgan WJ, Holberg CJ, Halonen M, Taussig LM et al. Respiratory syncytial virus in early life and risk of wheeze and allergy by age 13 years. *Lancet* 1999; 354: 541-5.
10. Sigurs N, Gustafsson PM, Bjarnason R, Lundberg F, Schmidt S, Sigurbergsson F et al. Severe respiratory syncytial virus bronchiolitis in infancy and asthma and allergy at age 13. *Am J Resp Crit Care Med* 2005; 171: 137-41.
11. Shaheen SO, Aaby P, Hall AJ, Barker DJ, Heyes CB, Shiell AW, et al. Measles and atopy Guinea-Bissau. *Lancet* 1996; 347: 1792-96.

1  
2  
3 12. McIntire JJ, Umetsu SE, Macaubas C, Hoyte EG, Cinnioglu C, Cavalli-Sforza LL et al.  
4 Immunology: hepatitis A virus link to atopic disease. *Nature* 2003; 425: 576.  
5  
6  
7 13. Shirakawa T, Enomoto T, Shimazu S, Hopkin JM. The inverse association between  
8 tuberculin responses and atopic disorder. *Science* 1997; 275: 77-9.  
9  
10  
11 14. Gould HJ, Takhar P, Harries HE, Chevretton E, Sutton BJ. The allergic march from  
12 *Staphylococcus aureus* superantigens to immunoglobulin E. *Chem Immunol Allergy*  
13 2007; 93: 106-36.  
14  
15  
16  
17 15. Jang N, Stewart G, Jones G. Polymorphisms within the PHF11 gene at chromosome  
18 13q14 are associated with childhood atopic dermatitis. *Genes Immun* 2005; 6: 262-4.  
19  
20  
21 16. Kurz T, Hoffjan S, Hayes MG, Schneider D, Nicolae R, Heinzmann A, et al. Fine  
22 mapping and positional candidate studies on chromosome 5p13 identify multiple  
23 asthma susceptibility loci. *J Allergy Clin Immunol* 2006; 118: 396-402.  
24  
25  
26  
27 17. Zhang Y, Leaves NI, Anderson GG, Ponting CP, Broxholme J, Holt R, et al. Positional  
28 cloning of a quantitative trait locus on chromosome 13q14 that influences  
29 immunoglobulin E levels and asthma. *Nat Genet* 2003; 34: 181-6.  
30  
31  
32 18. Sakuntabhai A, Ndiaye R, Casademont I, Peerapittayamongkol C, Rogier C, Tortevoe  
33 P, et al. Genetic determination and linkage mapping of *Plasmodium falciparum*  
34 malaria related traits in Senegal. *PLoS ONE* 2008; 3: e2000.  
35  
36  
37  
38 19. Cargill M, Schrodi SJ, Chang M, Garcia VE, Brandon R, et al. A large-scale genetic  
39 association study confirms IL12B and leads to the identification of IL23R as psoriasis-  
40 risk genes. *Am J Hum Genet* 2007; 80: 273-90.  
41  
42  
43  
44 20. Haileamlak A, Dagoye D, Williams H, Venn AJ, Hubbard R, Britton J, et al. Early life risk  
45 factors for atopic dermatitis in Ethiopian children. *J Allergy Clin Immunol* 2005; 115:  
46 370-6.  
47  
48  
49  
50 21. Kohara Y, Tanabe K, Matsuoka K, Kanda N, Matsuda H, Karasuyama H, et al. A major  
51 determinant quantitative-trait locus responsible for atopic dermatitis-like skin lesions  
52 in NC/Nga mice is located on Chromosome 9. *Immunogenetics* 2001; 53: 15-21.  
53  
54  
55  
56  
57  
58  
59  
60

22. Beghdadi W, Porcherie A, Schneider BS, Dubayle D, Peronet R, Huerre M, et al. Inhibition of histamine-mediated signaling confers significant protection against severe malaria in mouse models of disease. *J Exp Med* 2008; 205: 395-408.
23. Srichaikul T, Archararit N, Siriasawakul T, Viriyapanich T. Histamine changes in *Plasmodium falciparum* malaria. *Trans R Soc Trop Med Hyg* 1976; 70: 36-8.
24. Bhattacharya U, Roy S, Kar PK, Sarangi B, Lahiri SC. Histamine & kinin system in experimental malaria. *Indian J Med Res* 1988; 88: 558-63.
25. Trape JF, Tall A, Diagne N, Ndiath O, Ly AB, Faye J, et al. Malaria morbidity and pyrethroid resistance after the introduction of insecticide-treated bednets and artemisinin-based combination therapies: a longitudinal study. *Lancet Infect Dis* 2011; 11: 925-32.
26. Abecasis GR, Cherny SS, Cookson WO, Cardon LR. Merlin-- rapid analysis of dense genetic maps using sparse gene flow trees. *Nat Genet* 2001; 30: 97-101.
27. Asher MI, Keil U, Anderson HR, Beasley R, Crane J, Martinez F, et al. International Study of Asthma and Allergies in Childhood (ISAAC): rationale and methods. *Eur Respir J* 1995; 8: 483-91.
28. Yamada E, Vanna AT, Naspitz CK, Solé D. International Study of Asthma and Allergies in Childhood (ISAAC): validation of the written questionnaire (eczema component) and prevalence of atopic eczema among Brazilian children. *J Investig Allergol Clin Immunol* 2002; 12: 34-41.
29. Nacher M. Malaria vaccine trials in a wormy world. *Trends Parasitol* 2001; 17: 563-5
30. Yazdanbakhsh M, Kremsner PG, van Ree R. Allergy, parasites, and the hygiene hypothesis. *Science* 2002; 296: 490-4.
31. Lawaly R, Konate L, Marrama L, Dia I, Diallo D, Diène Sarr F, et al. Impact of mosquito bites on asexual parasite density and gametocyte prevalence in asymptomatic chronic *Plasmodium falciparum* infections and correlation with IgE and IgG titres. *Infection and Immunity* 2012; 80: 2240-6.

32. Machado A, Loucoubar C, Grange L, Bureau JF, Sakuntabhai A, Paul R. Human genetic contribution to the outcome of infection with malaria parasites. In: MALARIA PARASITES, ISBN: 979-953-307-072-7, Okwa O (Ed.), INTECH, Rijeka 2012; 267-292.

33. Doolan DL, Dobaño C, Baird JK. Acquired Immunity to Malaria. *Clin Microbiol Rev* 2009; 22: 13–36.

34. Marsh K, Snow RW. Host-parasite interaction and morbidity in malaria endemic areas. *Philos Trans R Soc London B* 1997; 352: 1385–94.

35. Perignon JL, Druilhe P. Immune mechanisms underlying the premonition against *Plasmodium falciparum* malaria. *Mem Inst Oswaldo Cruz* 1994; 89 Suppl. 2: 51–3.

36. Lell B, Borrmann S, Yazdanbakhsh M, Kremsner PG. Atopy and malaria. *Wien Klin Wochenschr* 2001; 113: 927-9.

37. Westritschnig K, Sibanda E, Thomas W, Auer H, Aspöck H, Pittner G, et al. Analysis of the sensitization profile towards allergens in central Africa. *Clin Exp Allergy* 2003; 33: 22-7.

38. Cohen S, McGregor IA, Carrington S. Gamma-globulin and acquired immunity to human malaria. *Nature* 1961; 192: 733–7.

39. de Jong EC, Vieira PL, Kalinski P, Schuitemaker JH, Tanaka Y, Wierenga EA et al. Microbial compounds selectively induce Th1 cell-promoting or Th2 cell-promoting dendritic cells *in vitro* with diverse Th cell-polarizing signals. *J Immunol* 2002; 168: 1704–9.

40. Baird JK. Age-dependent characteristics of protection versus susceptibility to *Plasmodium falciparum*. *Ann Trop Med Parasitol* 1998; 92: 367–90.

41. Mecheri S. Contribution of allergic inflammatory response to the pathogenesis of malaria disease. *Biochim Biophys Acta* 2011; 1822: 49-56.

42. Sowunmi A, Gbotosho GO, Happi CT, Adedeji AA, Bolaji OM, Fehintola FA, et al. Enhancement of the antimalarial efficacy of amodiaquine by chlorpheniramine *in vivo*. *Mem Inst Oswaldo Cruz* 2007; 102: 417-9.

43. Chong CR, Chen X, Shi L, Liu JO, Sullivan DJ. A clinical drug library screen identifies astemizole as an antimalarial agent. *Nat Chem Biol* 2006; 2: 415-416.

- 1  
2  
3 44. MacDonald SM, Bhisutthibhan J, Shapiro TA, Rogerson SJ, Taylor TE, Tembo M, et al.  
4 Immune mimicry in malaria: *Plasmodium falciparum* secretes a functional histamine-  
5 releasing factor homolog *in vitro* and *in vivo*. *Proc Natl Acad Sci USA* 2001; 98: 10829-  
6 32.  
7  
8  
9  
10 45. De Silva PM, Marshall JM. Factors contributing to urban malaria transmission in sub-  
11 saharan Africa: a systematic review. *J Trop Med* 2012; doi: 10.1155/2012/819563.  
12  
13 46. Bob NS, Diop BM, Renaud F, Marrama L, Durand P, Tall A, et al. Parasite  
14 polymorphism and severe malaria in Dakar (Senegal): a West African urban area. *PLoS*  
15 *One* 2010; 5: e9817.  
16  
17 47. Musonda CC, Whitlock GA, Witty MJ, Brun R, Kaiser M. Chloroquine-astemizole  
18 hybrids with potent *in vitro* and *in vivo* antiplasmodial activity. *Bioorg Med Chem Lett*  
19 2009; 19: 481-4.  
20  
21 48. Egan TJ, Kaschula CH. Strategies to reverse drug resistance in malaria. *Curr Opin*  
22 *Infect Dis* 2007; 20: 598-604.  
23  
24  
25  
26  
27  
28  
29  
30  
31  
32  
33  
34  
35  
36  
37  
38  
39  
40  
41  
42  
43  
44  
45  
46  
47  
48  
49  
50  
51  
52  
53  
54  
55  
56  
57  
58  
59  
60

**Table 1 Classification of Asthma, Allergic rhinoconjunctivitis, Atopic dermatitis and overall Atopic status according to ISAAC questionnaire in children aged 0-14 from a malaria birth cohort.** N is total number of children examined and n-malaria represents those for whom malaria data were recorded. F is the number of females and M the number of males.

|                                     | N (F/M)     | %     | n-malaria (F/M) |
|-------------------------------------|-------------|-------|-----------------|
| <b>Asthma symptoms</b>              |             |       |                 |
| None                                | 153 (73/80) | 87.43 | 125 (59/66)     |
| Moderate                            | 4 (1/3)     | 2.29  | 4 (1/3)         |
| Severe                              | 18 (6/12)   | 10.29 | 14 4/10)        |
| <b>Rhinoconjunctivitis symptoms</b> |             |       |                 |
| None                                | 146 (64/82) | 83.43 | 120 (52/68)     |
| Moderate                            | 11 (8/3)    | 6.29  | 9(6/3)          |
| Severe                              | 18 (6/12)   | 10.29 | 14 (6/8)        |
| <b>Atopic dermatitis symptoms</b>   |             |       |                 |
| None                                | 159 (75/84) | 90.86 | 128 (60/68)     |
| Moderate                            | 11 (1/10)   | 6.29  | 11 (1/10)       |
| Severe                              | 5 (4/1)     | 2.86  | 4 (3/1)         |
| <b>Atopic tendency</b>              |             |       |                 |
| Unlikely                            | 119 (56/63) | 68.00 | 97 (46/51)      |
| Probable                            | 16 (8/8)    | 9.14  | 14 (6/8)        |
| Highly probable                     | 40 (16/24)  | 22.86 | 32 (12/20)      |

**Table 2 Impact of allergy status on risk of *P. falciparum* clinical episodes.** Shown are the *P* values and adjusted Odds Ratios with 95% confidence intervals calculated from the mixed model analyses. Values for the covariables Age ( $\geq 3.5$  years of age compared to  $< 3.5$  years of age), Trimestrial incidence of *P. falciparum* clinical episodes and HbAS (beta-globin sickle cell trait; AS compared to AA) are those from the Asthma model analysis. For clarity significant co-variables are shown in bold.

|                       | Age groups $< 3.5$ years     | ORa         | 95% Confidence Intervals |             | <i>P</i> value                          |
|-----------------------|------------------------------|-------------|--------------------------|-------------|-----------------------------------------|
|                       |                              |             | Lower                    | Upper       |                                         |
| Atopy                 | <b>Both</b>                  | <b>1.65</b> | <b>1.20</b>              | <b>2.26</b> | <b><math>2.0 \times 10^{-3}</math></b>  |
|                       | $< 3.5$                      | 1.38        | 0.92                     | 2.08        | 0.124                                   |
|                       | <b><math>\geq 3.5</math></b> | <b>2.02</b> | <b>1.39</b>              | <b>2.93</b> | <b><math>2.1 \times 10^{-4}</math></b>  |
| Asthma                | <b>Both</b>                  | <b>2.12</b> | <b>1.46</b>              | <b>3.08</b> | <b><math>8.0 \times 10^{-5}</math></b>  |
|                       | $< 3.5$                      | 1.50        | 0.90                     | 2.50        | 0.122                                   |
|                       | <b><math>\geq 3.5</math></b> | <b>2.33</b> | <b>1.50</b>              | <b>3.61</b> | <b><math>1.5 \times 10^{-4}</math></b>  |
| Atopic dermatitis     | Both                         | 1.05        | 0.65                     | 1.70        | 0.842                                   |
|                       | $< 3.5$                      | 0.84        | 0.49                     | 1.46        | 0.539                                   |
|                       | <b><math>\geq 3.5</math></b> | <b>3.15</b> | <b>1.56</b>              | <b>6.33</b> | <b><math>1.3 \times 10^{-3}</math></b>  |
| Rhinoconjunctivitis   | Both                         | 0.96        | 0.65                     | 1.41        | 0.818                                   |
|                       | $< 3.5$                      | 1.05        | 0.64                     | 1.72        | 0.853                                   |
|                       | $\geq 3.5$                   | 0.95        | 0.60                     | 1.52        | 0.834                                   |
| Age $\geq 3.5$        |                              | <b>0.48</b> | <b>0.40</b>              | <b>0.57</b> | <b><math>2.7 \times 10^{-15}</math></b> |
| Trimestrial incidence |                              | <b>1.01</b> | <b>1.00</b>              | <b>1.01</b> | <b><math>1.8 \times 10^{-6}</math></b>  |
| HbAS                  |                              | <b>0.24</b> | <b>0.12</b>              | <b>0.47</b> | <b><math>3.7 \times 10^{-5}</math></b>  |

**Table 3 Impact of allergy status on the maximum *P. falciparum* parasite density during a clinical malaria episode.** Shown are the back-transformed mean parasite densities per microlitre and standard errors (SEM) estimated from the GLMM analyses after taking into account the other co-variables. Significantly different effects are shown in bold for clarity.

| Allergic condition  | Age groups | Allergic status<br>(No/Yes) | Mean parasite density | SEM  | P value                     |
|---------------------|------------|-----------------------------|-----------------------|------|-----------------------------|
| Atopy               | Both       | N                           | <b>76.3</b>           | 13.8 |                             |
|                     |            | Y                           | <b>131.0</b>          | 36.4 | <b>0.0158</b>               |
|                     | <3.5       | N                           | 114.3                 | 23.7 |                             |
|                     |            | Y                           | 171.1                 | 56.0 | 0.148                       |
|                     | ≥3.5       | N                           | <b>48.4</b>           | 9.8  |                             |
|                     |            | Y                           | <b>114.8</b>          | 37.1 | <b>9.5x10<sup>-4</sup></b>  |
| Asthma              | Both       | N                           | <b>78.1</b>           | 14.4 |                             |
|                     |            | Y                           | <b>148.5</b>          | 44.3 | <b>3.8 x10<sup>-3</sup></b> |
|                     | <3.5       | N                           | 114.8                 | 24.3 |                             |
|                     |            | Y                           | 171.9                 | 74.5 | 0.167                       |
|                     | ≥3.5       | N                           | <b>51.3</b>           | 9.7  |                             |
|                     |            | Y                           | <b>105.3</b>          | 41.0 | <b>6.2 x10<sup>-3</sup></b> |
| Atopic dermatitis   | Both       | N                           | 82.6                  | 15.0 |                             |
|                     |            | Y                           | 93.9                  | 38.9 | 0.605                       |
|                     | <3.5       | N                           | 122.6                 | 25.5 |                             |
|                     |            | Y                           | 133.9                 | 63.5 | 0.425                       |
|                     | ≥3.5       | N                           | <b>52.3</b>           | 11.0 |                             |
|                     |            | Y                           | <b>135.4</b>          | 70.7 | <b>0.014</b>                |
| Rhinoconjunctivitis | Both       | N                           | 81.5                  | 14.8 |                             |
|                     |            | Y                           | 111.4                 | 39.0 | 0.570                       |
|                     | <3.5       | N                           | 118.8                 | 25.1 |                             |
|                     |            | Y                           | 166.3                 | 69.9 | 0.537                       |
|                     | ≥3.5       | N                           | 54.6                  | 11.3 |                             |
|                     |            | Y                           | 80.9                  | 33.7 | 0.327                       |

**Figure 1** Annual incidence rate of clinical *P. falciparum* episodes per 100 children (bold line). In order to overcome the fluctuations of the annual incidence rate, we fit second (dotted line), third (dashed line) and fourth (solid line) degree polynomial trend lines to the data (bold line). The corresponding R-squared values are 0.70, 0.91 and 0.99 respectively indicating an accurate fit for third and fourth order polynomials. The inflexion on these two trend lines indicates the onset of acquisition of clinical immunity at approximately 3 to 4 years of age.

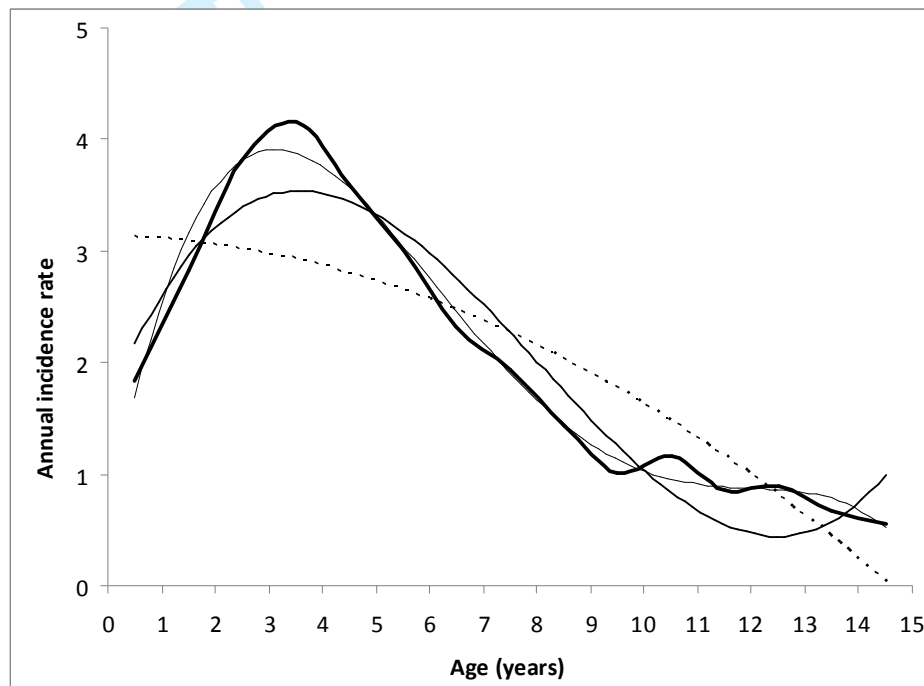

**Figure 2** Mean cumulative number of *P. falciparum* clinical episodes with age for the (A) Asthma, (B) Rhinoconjunctivitis and (C) Atopic dermatitis classes and overall Atopy class (D) (bold lines) compared to individuals without symptoms of each respective allergy type (thin lines). In all cases moderate and severe classes are combined and compared to individuals without allergy symptoms. Note there are no children older than 11 years of age with Atopic dermatitis.

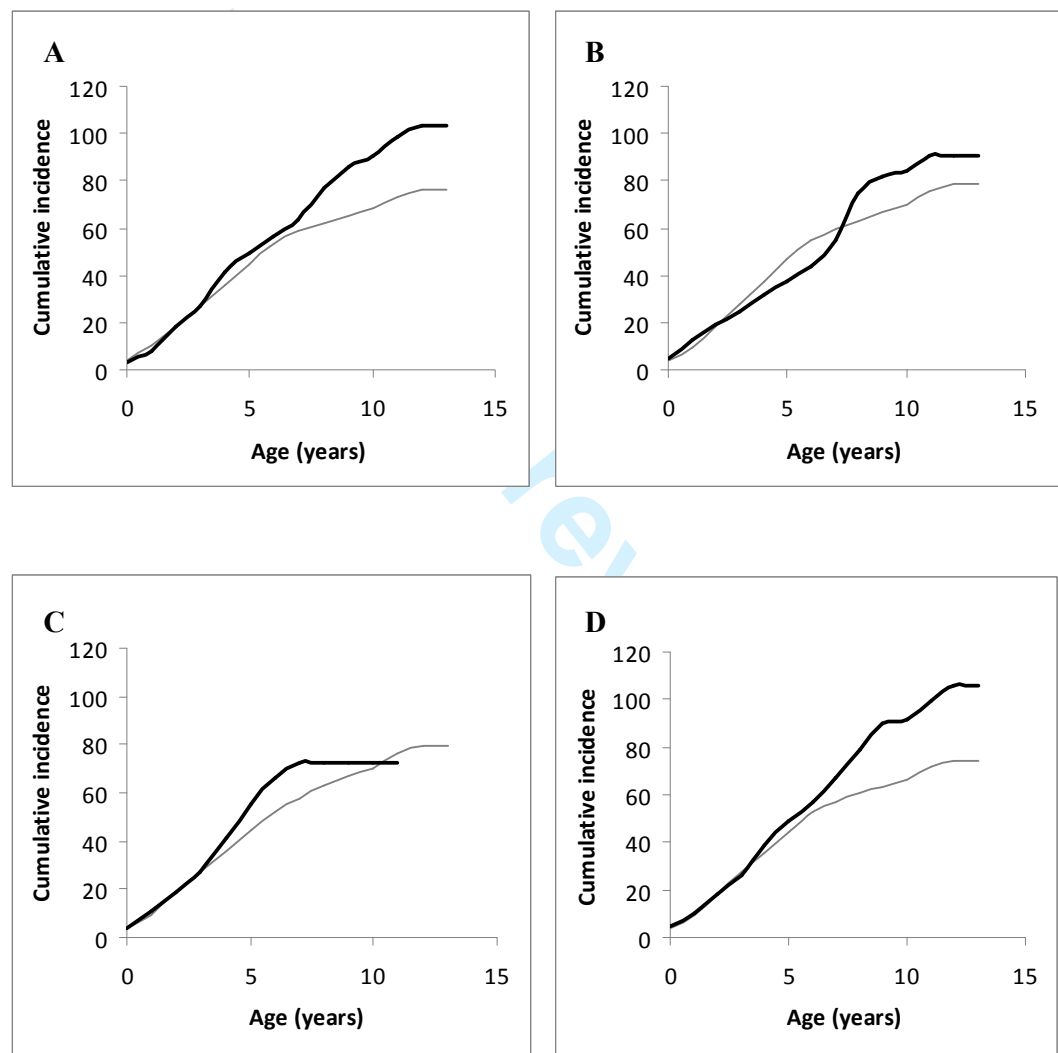

### Pedigree-based genetic relatedness

The Genetic covariance between two individuals can be computed using the pedigree information. For individuals A and B, a given pair in a pedigree, the genetic covariance is computed as  $r(A,B) = 2 \times \text{coancestry}(A,B)$  where the *coancestry* between A and B is calculated referring to the method presented by Falconer and Mackay in 1996 (Falconer and Mackay 1996):  $\text{coancestry}(A,B) = \sum_p (1/2)^{n(p)} \times (1 + I_{\text{Common Ancestor}})$  where  $p$  is the number of paths in the pedigree linking A and B,  $n(p)$  the number of individuals (including A and B) for each path  $p$  and  $I_X$  is the *inbreeding* coefficient of X also equal to the *coancestry* between the two parents of X,  $I_X$  is set to 0 if X is a founder.

**Illustration:** Consider, as an example, the pedigree below containing 18 individuals named {A, B, ..., R} for the calculation of genetic covariance's.



**Pedigree structure.**

The genetic relatedness between individuals N and O is equal to 0.266. This value is calculated as followed:

The number of paths linking N and O from the pedigree structure above is  $p = 2$ .

As illustrated below:

- **Path 1** contains  $n(1) = 3$  individuals {N, K, O} with K as the common ancestor. Inbreeding coefficient of K,  $I_K$ , is the *coancestry* between the two parents of K (F and G) and is null because F and G are not genetically linked.
- **Path 2** contains  $n(2) = 7$  individuals {N, K, F, B, H, L, O} with B as the common ancestor. Inbreeding coefficient of B,  $I_B$ , is null because B is a founder.

Therefore, genetic relatedness between individuals N and O is:

$$\begin{aligned}
 &= 2 \times (0.5^{n(1)} \times (1 + I_K) + 0.5^{n(2)} \times (1 + I_B)) \\
 &= 2 \times (0.5^3 \times (1 + 0) + 0.5^7 \times (1 + 0)) = 0.266
 \end{aligned}$$

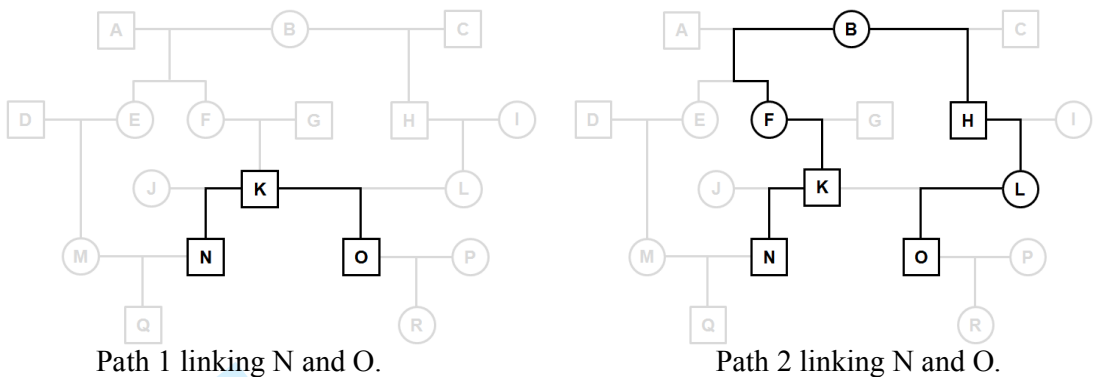

Defining an equivalent model design where individual effects are independent using the genetic relatedness matrix:

Let us rename  $Y^* = l(\mu)$ .  $Y^*$  can be consider as a linearization of the phenotype through the link function  $l$ . The expected mean of  $Y^*$  and the variance of  $Y^*$  are:

(i)  $E(Y^*) = E(X\beta + Z\gamma + \varepsilon)$   
 $= E(X\beta) + E(Z\gamma) + E(\varepsilon) = X \times E(\beta) + Z \times E(\gamma) + E(\varepsilon)$   
 $= X\beta$  (asymptotically).

(ii)  $Var(Y^*) = Var(X\beta + Z\gamma + \varepsilon)$   
 $= Var(Z\gamma + \varepsilon)$  (as  $X\beta$  is the fixed part, thus has variance equal to 0)  
 $= Var(Z\gamma) + Var(\varepsilon)$  (as  $\gamma$  and  $\varepsilon$  are independent)  
 $= Z \times Var(\gamma) \times Z^T + Var(\varepsilon)$  ( $Z^T$  is the transpose of  $Z$ )  
 $= Z(A\sigma_g^2)Z^T + I\sigma_r^2$   
 $= ZAZ^T\sigma_g^2 + I\sigma_r^2$

If individuals were independent, i.e.  $A = I_N$ , variance of  $Y^*$  could be expressed as  $ZZ^T\sigma_g^2 + I\sigma_r^2$ . However, using linear algebra theory by the method “Cholesky decomposition of a matrix”, we can show that there is an equivalent expression of the variance of  $Y^*$  corresponding to the modeling of data from independent individuals, having  $\gamma^*$  as an equivalent vector of random effects and  $Z^*$  an equivalent design matrix relating  $\gamma^*$  to  $Y^*$  so that:  
 $Var(Y^*) = Z^*(I\sigma_g^2)Z^{*T} + I\sigma_r^2$ .  $I\sigma_g^2$  is then the covariance matrix of the equivalent independent random individual effects  $\gamma^*$ .

**Theorem: Cholesky decomposition of a matrix**

If  $A$  is a symmetric positive-definite matrix, there is a triangular matrix  $L$  so that  $A$  can be written as  $A = LL^T$ .  $L$  can be seen as the “square root” of the matrix  $A$ .  
Note that the genetic relatedness matrix  $A$  computed using the pedigree information (Falconer and Mackay 1996) is a positive-definite matrix, unless identical twins are in the pedigree in which case it would be positive semi-definite.

**Equivalent model with independent random effects:** We set  $A = LL^T$  then:

$$Var(Y^*) = Z(A\sigma_g^2)Z^T + I\sigma_r^2$$
$$= Z(LL^T\sigma_g^2)Z^T + I\sigma_r^2$$

$$\begin{aligned}
 &= ZLL^T Z^T \sigma_g^2 + I\sigma_r^2 \\
 &= (ZL)(ZL)^T \sigma_g^2 + I\sigma_r^2 \\
 &= (Z^*)(Z^*)^T \sigma_g^2 + I\sigma_r^2 \quad (\text{where we set } Z^* = ZL)
 \end{aligned}$$

Then, if we define  $\gamma^* = L^{-1}\gamma$ , we can rewrite the model as:

$$Y^* = X\beta + Z^*\gamma^* + \varepsilon \quad (\text{because } Z\gamma = Z(LL^{-1})\gamma = (ZL)(L^{-1}\gamma) = Z^*\gamma^*),$$

and the  $\gamma_i^*$  are independent, in other terms  $\text{Var}(\gamma^*) = I\sigma_g^2$ , as demonstrated below:

We assumed that  $\gamma \sim N(0, A\sigma_g^2)$ . Then  $\gamma^* = L^{-1}\gamma$  is also distributed as a multivariate Normal with mean  $E(\gamma^*) = L^{-1}E(\gamma) = L^{-1} \times 0 = 0$  and variance:

$$\begin{aligned}
 \text{Var}(\gamma^*) &= (L^{-1}) \times \text{Var}(\gamma) \times (L^{-1})^T \\
 &= (L^{-1}) \times A\sigma_g^2 \times (L^{-1})^T = (L^{-1})LL^T(L^{-1})^T \sigma_g^2 \\
 &= (L^{-1}L)(L^{-1}L)^T \sigma_g^2 \\
 &= I\sigma_g^2
 \end{aligned}$$

The random effects are now independent and then the classical mixed model assuming independence between levels (here individuals) is applied, and the estimate of fixed effects obtained are fine, i.e. corrected for genetic relationships.

## References

Falconer DS, Mackay TFC (1996) Introduction to Quantitative Genetics. 4<sup>th</sup> Edn. London: Longman.

1  
2  
3  
4  
5  
6  
7  
8  
9  
10  
11  
12  
13  
14  
15  
16  
17  
18  
19  
20  
21  
22  
23  
24  
25  
26  
27  
28  
29  
30  
31  
32  
33  
34  
35  
36  
37  
38  
39  
40  
41  
42  
43  
44  
45  
46  
47  
48  
49

Supplementary Tables

**Table S1 Number of person-trimesters contributed by number of children by age class and the number who had severe/moderate allergy symptoms, for whom malaria data were also available.** AS – Asthma, AD – Atopic dermatitis, RC – Rhinoconjunctivitis. Shown also are the numbers of these individuals suffering from two or all three allergy conditions.

| Age group | N° person-trimesters | N° people | AS | AD | RC | AS+AD | AS+RC | AD+RC | AS+AD+RC |
|-----------|----------------------|-----------|----|----|----|-------|-------|-------|----------|
| ]1        | 7                    | 6         | 1  | 2  | 2  | 0     | 1     | 0     | 0        |
| ]2        | 21                   | 9         | 0  | 1  | 3  | 0     | 0     | 0     | 0        |
| ]3        | 48                   | 11        | 1  | 1  | 2  | 0     | 0     | 1     | 0        |
| ]4        | 119                  | 12        | 1  | 2  | 3  | 0     | 0     | 1     | 0        |
| ]5        | 102                  | 11        | 3  | 4  | 3  | 2     | 1     | 2     | 1        |
| ]6        | 125                  | 11        | 1  | 1  | 0  | 0     | 0     | 0     | 0        |
| ]7        | 303                  | 11        | 1  | 2  | 1  | 1     | 0     | 0     | 0        |
| ]8        | 340                  | 12        | 1  | 1  | 1  | 1     | 0     | 0     | 0        |
| ]9        | 362                  | 10        | 2  | 0  | 1  | 0     | 1     | 0     | 0        |
| ]10       | 610                  | 17        | 1  | 0  | 3  | 0     | 0     | 0     | 0        |
| ]11       | 77                   | 4         | 2  | 1  | 0  | 0     | 0     | 0     | 0        |
| ]12       | 484                  | 16        | 3  | 0  | 3  | 0     | 1     | 0     | 0        |
| ]13       | 390                  | 10        | 1  | 0  | 0  | 0     | 0     | 0     | 0        |
| ]14       | 105                  | 3         | 0  | 0  | 1  | 0     | 0     | 0     | 0        |
| Total     | 3093                 | 143       | 18 | 15 | 23 | 4     | 4     | 4     | 1        |

**Table S2 Summary of total number of person-trimesters with non-malaria and symptomatic *P. falciparum* clinical presentations and total number of non-malaria episodes according to age class.** Given are the number of people contributing to each type of presentation.

|                                                   | Age group (years) |      |
|---------------------------------------------------|-------------------|------|
|                                                   | <3·5              | ≥3·5 |
| Total person-trimesters                           | 1283              | 1810 |
| People                                            | 126               | 113  |
| Total <i>P. falciparum</i> symptomatic trimesters | 963               | 1102 |
| People                                            | 114               | 108  |
| Total non-malaria episodes                        | 754               | 1114 |
| People                                            | 123               | 109  |

1  
2  
3  
4  
5  
6  
7  
8  
9  
10  
11  
12  
13  
14  
15  
16  
17  
18  
19  
20  
21  
22  
23  
24  
25  
26  
27  
28  
29  
30  
31  
32  
33  
34  
35  
36  
37  
38  
39  
40  
41  
42  
43  
44  
45  
46  
47  
48  
49

**Table S3 Effect of changing age threshold on impact of allergy on the risk of clinical malaria and concomitant parasite density.** Given are Odds Ratio with 95% confidence intervals, for clinical malaria episodes and the beta coefficient and standard error for parasite density. Corresponding P values are also given. Values are from the nested GLMM analyses.

| A. Malaria episodes |      |                 |                      |      |                 |         | B. Parasite density |                 |                      |                 |                      |
|---------------------|------|-----------------|----------------------|------|-----------------|---------|---------------------|-----------------|----------------------|-----------------|----------------------|
| Age cut-off (years) | OR   | 95% CI          | P value              | OR   | 95% CI          | P value | Age cut-off         | beta coeff (se) | P value              | beta coeff (se) | P value              |
| Atopy               |      | above threshold |                      |      | below threshold |         | Atopy               | above threshold |                      | below threshold |                      |
| 1.5                 | 1.80 | 1.25-2.59       | 1.7x10 <sup>-3</sup> | 1.57 | 0.85-2.89       | 0.15    | 1.5                 | 0.70 (0.27)     | 9.2x10 <sup>-3</sup> | 0.54 (0.35)     | 0.12                 |
| 2.5                 | 2.00 | 1.39-2.88       | 2.0x10 <sup>-4</sup> | 1.23 | 0.76-1.99       | 0.40    | 2.5                 | 0.79 (0.26)     | 2.6x10 <sup>-3</sup> | 0.35 (0.29)     | 0.23                 |
| 3.5                 | 2.02 | 1.39-2.93       | 2.1x10 <sup>-4</sup> | 1.38 | 0.92-2.08       | 0.12    | 3.5                 | 0.85 (0.26)     | 9.5x10 <sup>-4</sup> | 0.37 (0.26)     | 0.15                 |
| 4.5                 | 2.10 | 1.42-3.10       | 1.6x10 <sup>-4</sup> | 1.41 | 0.98-2.04       | 0.063   | 4.5                 | 0.87 (0.25)     | 6.9x10 <sup>-4</sup> | 0.40 (0.23)     | 0.09                 |
| 5.5                 | 1.64 | 1.07-2.52       | 0.02                 | 1.67 | 1.17-2.37       | 0.004   | 5.5                 | 0.73 (0.27)     | 7.4x10 <sup>-3</sup> | 0.48 (0.22)     | 3.4x10 <sup>-3</sup> |
| Asthma              |      |                 |                      |      |                 |         | Asthma              |                 |                      |                 |                      |
| 1.5                 | 1.98 | 1.29-3.03       | 1.8x10 <sup>-3</sup> | 1.46 | 0.69-3.19       | 0.34    | 1.5                 | 0.66 (0.31)     | 0.03                 | 0.30 (0.44)     | 0.48                 |
| 2.5                 | 2.30 | 1.49-3.55       | 1.6x10 <sup>-4</sup> | 1.15 | 0.63-2.09       | 0.65    | 2.5                 | 0.78 (0.30)     | 0.01                 | 0.26 (0.36)     | 0.48                 |
| 3.5                 | 2.33 | 1.50-3.61       | 1.5x10 <sup>-4</sup> | 1.50 | 0.90-2.50       | 0.12    | 3.5                 | 0.82 (0.30)     | 6.2x10 <sup>-3</sup> | 0.43 (0.31)     | 0.17                 |
| 4.5                 | 2.30 | 1.48-3.59       | 2.4x10 <sup>-4</sup> | 1.76 | 1.11-2.80       | 0.017   | 4.5                 | 0.81 (0.29)     | 5.8x10 <sup>-3</sup> | 0.56 (0.28)     | 0.049                |
| 5.5                 | 1.98 | 1.22-3.22       | 0.006                | 2.06 | 1.33-3.18       | 0.0011  | 5.5                 | 0.72 (0.31)     | 0.02                 | 0.62 (0.27)     | 0.02                 |
| Atopic Dermatitis   |      |                 |                      |      |                 |         | Atopic Dermatitis   |                 |                      |                 |                      |
| 1.5                 | 2.05 | 1.18-3.56       | 0.01                 | 0.91 | 0.42-1.97       | 0.80    | 1.5                 | 0.80 (0.37)     | 0.03                 | 0.72 (0.46)     | 0.12                 |
| 2.5                 | 2.49 | 1.36-4.57       | 3.1x10 <sup>-3</sup> | 0.82 | 0.44-1.53       | 0.53    | 2.5                 | 0.77 (0.38)     | 0.044                | 0.52 (0.39)     | 0.19                 |
| 3.5                 | 3.15 | 1.56-6.33       | 1.3x10 <sup>-3</sup> | 0.84 | 0.49-1.46       | 0.54    | 3.5                 | 0.99 (0.40)     | 0.014                | 0.28 (0.35)     | 0.42                 |
| 4.5                 | 3.79 | 1.61-8.92       | 2.3x10 <sup>-3</sup> | 0.94 | 0.57-1.57       | 0.82    | 4.5                 | 0.98 (0.47)     | 0.036                | 0.29 (0.32)     | 0.37                 |
| 5.5                 | 1.33 | 0.47-3.77       | 0.59                 | 1.19 | 0.73-1.96       | 0.49    | 5.5                 | 0.26 (0.61)     | 0.67                 | 0.38 (0.31)     | 0.22                 |
| Rhinoconjunctivitis |      |                 |                      |      |                 |         | Rhinoconjunctivitis |                 |                      |                 |                      |
| 1.5                 | 1.04 | 0.66-1.62       | 0.88                 | 1.01 | 0.51-2.01       | 0.98    | 1.5                 | 0.36 (0.32)     | 0.27                 | 0.18 (0.41)     | 0.66                 |
| 2.5                 | 1.01 | 0.64-1.61       | 0.96                 | 0.96 | 0.55-1.68       | 0.89    | 2.5                 | 0.28 (0.33)     | 0.40                 | 0.25 (0.35)     | 0.48                 |
| 3.5                 | 0.95 | 0.60-1.52       | 0.83                 | 1.05 | 0.64-1.72       | 0.85    | 3.5                 | 0.31 (0.32)     | 0.33                 | 0.19 (0.31)     | 0.54                 |
| 4.5                 | 0.87 | 0.54-1.42       | 0.59                 | 1.06 | 0.68-1.66       | 0.79    | 4.5                 | 0.20 (0.32)     | 0.53                 | 0.22 (0.28)     | 0.44                 |
| 5.5                 | 0.81 | 0.48-1.36       | 0.43                 | 1.07 | 0.70-1.64       | 0.74    | 5.5                 | 0.10 (0.33)     | 0.75                 | 0.23 (0.27)     | 0.39                 |

**Table S4 Frequency of non-malaria episodes (number of days of presence divided by number of non-malaria episodes) according to allergic status and age group.** The *P* value is that from the GLMM analyses of the effect of allergic status by age group on the number of non-malaria episodes per person-trimester.

| Allergic condition  | Allergic status<br>(No/Yes) | Age group (years) |       | <i>P</i> value |
|---------------------|-----------------------------|-------------------|-------|----------------|
|                     |                             | <3·5              | >3·5  |                |
| Atopy               | N                           | 78·2              | 85·9  | 0·105          |
|                     | Y                           | 87·2              | 102·6 |                |
| Asthma              | N                           | 79·6              | 87·3  | 0·319          |
|                     | Y                           | 82·5              | 100·2 |                |
| Atopic dermatitis   | N                           | 80·9              | 88·2  | 0·323          |
|                     | Y                           | 73·4              | 101·9 |                |
| Rhinoconjunctivitis | N                           | 77·9              | 88·3  | 0·167          |
|                     | Y                           | 94·9              | 91·8  |                |

Figure S1. Incidence of clinical cases per 100 person-trimesters in children under 15 years of age.

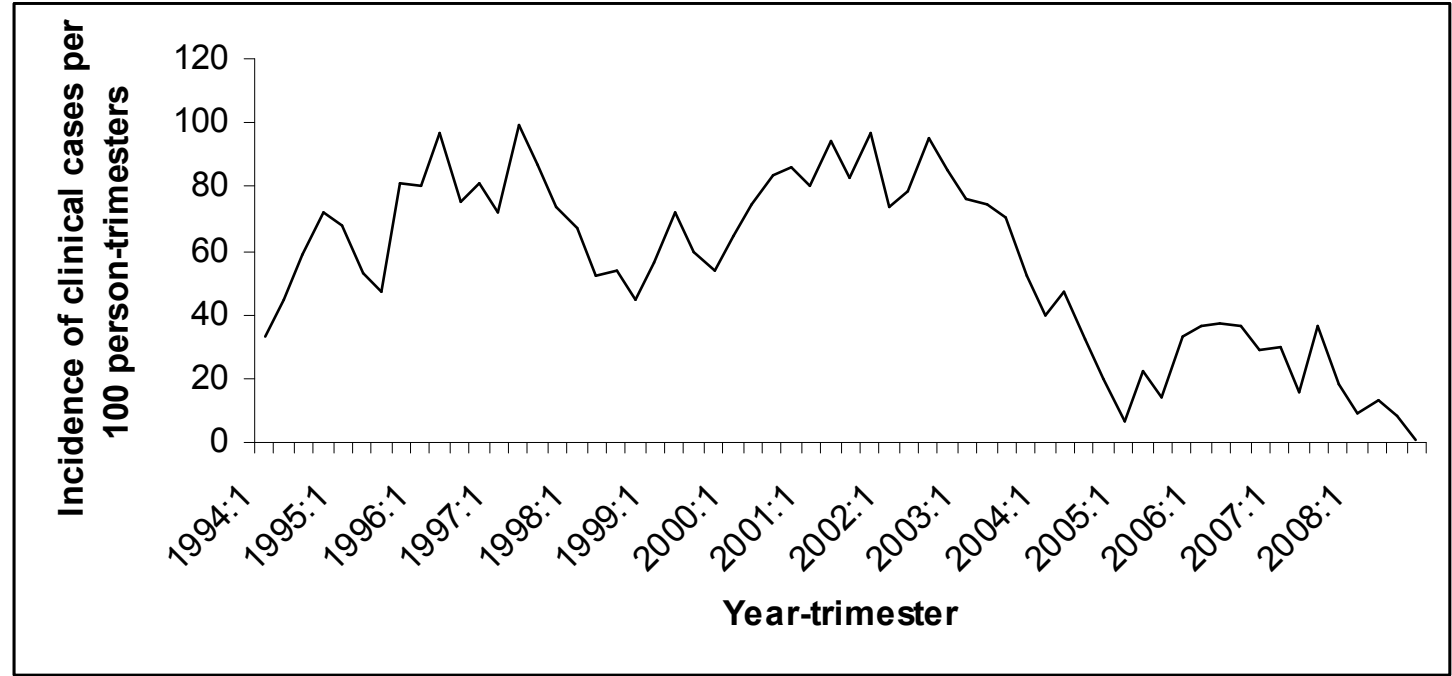

Figure S2. Cumulative incidence of clinical cases according to allergy class predicted by the statistical model.



1  
2  
3  
4  
5  
6  
7  
8  
9  
10  
11  
12  
13  
14  
15  
16  
17  
18  
19  
20  
21  
22  
23  
24  
25  
26  
27  
28  
29  
30  
31  
32  
33  
34  
35  
36  
37  
38  
39  
40  
41  
42  
43  
44  
45  
46  
47  
48  
49

**Figure S3. Graphical control model for parasite density**

These figures provide a graphical checking of model goodness of fit. Figure A is the scatter plot of the natural logarithm of the observed parasite density and is compared to Figure B, which is the scatter plot of the natural logarithm of the predicted parasite density by the model; on both figures A and B the y-axes give the values for the log of the parasite density. Figure C shows the distribution of the residuals with the predicted values and Figure D is the histogram of the residuals; both figures C and D show the residuals normally distributed around zero.



**Asthma and atopic dermatitis are associated with increased risk of clinical *Plasmodium falciparum* malaria**

Magali Herrant<sup>1,2</sup> *scientist*, Cheikh Loucoubar<sup>1,2,3,4</sup> *scientist*, Hubert Bassène<sup>5</sup> *scientist*, Bronner Gonçalves<sup>2</sup> MD, Sabah Boufkhed<sup>2</sup> *scientist*, Fatoumata Diene Sarr<sup>2</sup> MD, Arnaud Fontanet<sup>6,7</sup> MD, Adama Tall<sup>2</sup> *scientist*, Laurence Baril<sup>2</sup> MD, Odile Mercereau-Puijalon<sup>8</sup> *scientist*, Salaheddine Mécheri<sup>9</sup> *scientist*, Anavaj Sakuntabhai<sup>1,10</sup> *scientist*, Richard Paul<sup>1</sup> *scientist*

<sup>1</sup> Institut Pasteur, Unité de la Génétique Fonctionnelle des Maladies Infectieuses, CNRS

URA3012, 28 rue du Docteur Roux, F-75724, Paris cedex 15, France.

<sup>2</sup> Institut Pasteur de Dakar, Unité d'Epidémiologie des Maladies Infectieuses, Dakar, Senegal.

<sup>3</sup> INSERM, U946, Genetic Variation and Human Diseases Unit, F-75010, Paris, France.

<sup>4</sup> Université Paris Diderot, Sorbonne Paris Cité, Institut Universitaire d'Hématologie, F-75010, Paris, France.

<sup>5</sup> Institut de Recherche pour le Développement (IRD), Unité de Recherche sur les Maladies Infectieuses et Tropicales Emergentes, URMITE CNRS-IRD 198 UMR 6236, Dakar, Sénégal

<sup>6</sup> Institut Pasteur, Unité d'Epidémiologie des Maladies Emergentes, 25 rue du Docteur Roux, F-75724, Paris cedex 15, France.

<sup>7</sup> Conservatoire National des Arts et Métiers, 292 rue Saint Martin, Paris 75003, France

<sup>8</sup> Institut Pasteur, Unité d'Immunologie Moléculaire des Parasites, CNRS URA2581, Paris, France.

<sup>9</sup> Institut Pasteur, Unité de Biologie des Interactions Hôte Parasite, 25 rue du Docteur Roux, F-75724, Paris cedex 15, France.

<sup>10</sup> Complex Systems group, Faculty of Science, Mahidol University, Bangkok, Thailand.

**Correspondance to:** Richard Paul, Institut Pasteur, Unité de la Génétique Fonctionnelle des Maladies Infectieuses, 28 rue du Docteur Roux, 75724 Paris cedex 15, France.  
richard.paul@pasteur.fr

1  
2  
3  
4  
5  
6  
7  
8  
9  
10  
11  
12  
13  
14  
15  
16  
17  
18  
19  
20  
21  
22  
23  
24  
25  
26  
27  
28  
29  
30  
31  
32  
33  
34  
35  
36  
37  
38  
39  
40  
41  
42  
43  
44  
45  
46  
47  
48  
49  
50  
51  
52  
53  
54  
55  
56  
57  
58  
59  
60

**Article summary**

**Article focus**

- Genetic studies suggest a link between susceptibility to allergy and malaria in Africa
- We hypothesize that atopy increases susceptibility to malaria

**Key messages**

- Results demonstrate an association between asthma, atopic dermatitis and susceptibility to clinical *P. falciparum* episodes.
- Genetic pre-disposition to asthma or atopic dermatitis impairs the acquisition of clinical immunity to malaria.
- Administration of anti-histamines to atopic children will likely reduce the burden of clinical malaria in these children, increase the efficacy of first-line treatment anti-malarials and alleviate the non-infectious consequences of atopy.

**Strengths and limitations**

The major strength of this study is the complete knowledge of the number of clinical *P. falciparum* malaria episodes each individual has had since birth and the exposure level per trimester over the 15 years covering the birth cohort. No other study has such detailed information for such a length of time. The major weakness of the study is the relatively small sample size, which would have reduced power to detect an association.

## Abstract

**Objectives:** To assess the impact of atopy and allergy on the risk of clinical malaria.

**Design:** A clinical and immunological allergy cross-sectional survey in a birth cohort of 175 children from 1 month to 14 years of age followed for up to 15 years in a longitudinal open cohort study of malaria in Senegal. Malaria incidence data were available for 143 of these children (aged 4 months to 14 years of age) for up to 15 years. Mixed model regression analysis was used to determine the impact of allergy status on malaria incidence, adjusting for age, sickle cell trait and force of infection.

**Main outcome measures:** Asthma, allergic rhino-conjunctivitis and atopic dermatitis status, the number of clinical *Plasmodium falciparum* malaria episodes since birth and associated parasite density.

**Results:** Twelve percent of the children were classified as asthmatic and ten percent as having atopic dermatitis. These groups had respectively a two-fold (OR 2.12 95% confidence intervals 1.46% to 3.08%;  $P=8 \times 10^{-5}$ ) and three-fold (OR 3.15, 1.56% to 6.33%;  $P=1.3 \times 10^{-3}$ ) increase in the risk of clinical *P. falciparum* malaria once older than the age of peak incidence of clinical malaria (3 to 4.5 years of age). They also presented with higher *P. falciparum* parasite densities (Asthma: mean 105.3 parasites/ $\mu$ L  $\pm$ SE 41.0 vs. 51.3  $\pm$ 9.7;  $P=6.2 \times 10^{-3}$ ; Atopic dermatitis: 135.4  $\pm$ 70.7 vs. 52.3  $\pm$ 11.0;  $P=0.014$ ). There was no effect of allergy on the number of non-malaria clinical presentations. Individuals with allergic rhinoconjunctivitis did not have an increased risk of clinical malaria nor any difference in parasite densities.

**Conclusion:** These results demonstrate that asthma and atopic dermatitis delay the development of clinical immunity to *P. falciparum*. Despite the encouraging decrease in malaria incidence rates in Africa, a significant concern is the extent to which the increase in allergy will exacerbate the burden of malaria. Given the demonstrated anti-parasitic effect of anti-histamines, administration to atopic children will likely reduce the burden of clinical malaria in these children, increase the efficacy of first-line treatment anti-malarials and alleviate the non-infectious consequences of atopy.

1  
2  
3  
4  
5  
6  
7  
8  
9  
10  
11  
12  
13  
14  
15  
16  
17  
18  
19  
20  
21  
22  
23  
24  
25  
26  
27  
28  
29  
30  
31  
32  
33  
34  
35  
36  
37  
38  
39  
40  
41  
42  
43  
44  
45  
46  
47  
48  
49  
50  
51  
52  
53  
54  
55  
56  
57  
58  
59  
60

Introduction

The World Allergy Organization estimates that 40% of the world’s population is concerned by allergic diseases.<sup>1</sup> In developing countries where *Plasmodium falciparum* malaria is endemic, prevalence of allergy is significantly lower, but is on the increase.<sup>2</sup> Orientation of the immune response towards a Th1 profile is crucial for immunity to intracellular pathogens,<sup>3</sup> whereas orientation towards a Th2 profile drives immunity to extracellular pathogens and antigens resulting in class switching giving rise to IgE-producing B cells.<sup>4</sup> An important role of the Th1/Th2 balance in the development of clinical malaria following infection by *P. falciparum* has been suggested by numerous studies.<sup>5-7</sup> It has been suggested that the Th2 bias induced by *P. falciparum* may exacerbate allergy.<sup>8</sup> Likewise, an atopic state may generate a tendency to develop a Th2 type immune response to *P. falciparum*. However, the interplay between infectious agents and allergy is unclear. On the one hand, for example, severe respiratory syncytial virus infection in infants increased the risk of allergic rhinoconjunctivitis and allergic asthma.<sup>9,10</sup> On the other hand, measles,<sup>11</sup> hepatitis A<sup>12</sup> and tuberculosis<sup>13</sup> seemingly reduce atopy. Although, an atopic condition can increase incidence of disease, such as the case for the skin commensal *Staphylococcus aureus* in patients with atopic dermatitis,<sup>14</sup> an atopic tendency *per se* does not generally lead to increased illness from infectious agents.

*Plasmodium falciparum* specific IgE is elevated in malaria patients and has been proposed to play a pathogenic role in severe malaria.<sup>3</sup> T helper type 2 (Th2) cell bias induced by *P. falciparum* may exacerbate allergy.<sup>4</sup> Genome wide studies have identified chromosomal regions linked to clinical malaria, all of which overlap with those previously identified to be involved in atopic dermatitis, asthma, atopy and IgE levels<sup>5-7, 15-17</sup> suggesting that common mechanisms may be involved in both pathologies.<sup>18</sup> Chromosomal region 5q31 that has been repeatedly shown to be associated with control of parasite density and contains a cluster of cytokines, among which IL12B has been previously associated with psoriasis.<sup>19</sup> The other regions, 13q13-q22, 5p15-p13 and 12q21-q23, contain genes involved in innate immunity, notably the interleukin 7 receptor, and several involved in tumour necrosis factor synthesis [C1q and tumour necrosis factor related protein 3 (C1QTNF3)] and a gene involved in the complement system (C9).<sup>18</sup>

Formatted: Font: Calibri, 12 pt

Formatted: Superscript

Formatted: Superscript

Formatted: Font: Italic

Formatted: Superscript

Formatted: Font: Italic

Formatted: Superscript

Formatted: Font: Italic

Formatted: Font: Not Italic

Formatted: Superscript

Several additional lines of evidence support the concept that susceptibility to malaria and atopy may be related to similar immunological defects. In Ethiopia, a history of malaria was associated with atopy.<sup>920</sup> A mouse model for human atopic disease was found to be very susceptible to murine malaria and a major locus for atopic disease mapped close to the region controlling parasite density.<sup>2140</sup> This region contains several candidate genes that have effects on T-cell function.<sup>21</sup>

Moreover, a direct effect of histamine in the malaria pathogenesis has been found using genetic and pharmacological approaches<sup>4422</sup> and increased levels of histamine are associated with the severity of disease in humans infected with *P. falciparum* and in animal malaria models.<sup>12,213,24</sup>

To test the hypothesis that allergy impacts upon clinical *P. falciparum* malaria, we performed a clinical allergy cross-sectional study in the family-based longitudinal cohort from Senegal previously used for the genome linkage study<sup>818</sup> and analysed the impact of asthma, atopic dermatitis, allergic rhinoconjunctivitis on the incidence of clinical *P. falciparum* episodes and the maximum parasite density during each episode.

## Methods

### Population and outcome data

The malaria research program conducted in Dielmo village in Senegal has been ongoing since 1990 as described elsewhere.<sup>2454</sup> In brief, between 1990 and 2008, a longitudinal study involving the inhabitants of the village of Dielmo, Senegal, was carried out to identify all episodes of fever. The study design included daily medical surveillance with systematic blood testing of individuals with fever and examination of 200 oil-immersion fields on a thick blood film for malaria parasites (about 0.5 µL of blood). Each individual was given a unique identification code and details of family ties, occupation, and precise place of residence were recorded on detailed maps of each household with the location of each bedroom. All households were visited daily, absenteeism recorded, and the presence of fever or other symptoms assessed. We systematically recorded body temperature at home three times a week (every second day) in children younger than 5 years, and in older children and adults in cases of suspected fever or fever-related symptoms. In cases of fever or other symptoms,

Formatted: Space Before: 6 pt

Formatted: Space After: 0 pt, Line spacing: 1.5 lines

Formatted: Font: Calibri

1  
2  
3  
4  
5  
6  
7  
8  
9  
10  
11  
12  
13  
14  
15  
16  
17  
18  
19  
20  
21  
22  
23  
24  
25  
26  
27  
28  
29  
30  
31  
32  
33  
34  
35  
36  
37  
38  
39  
40  
41  
42  
43  
44  
45  
46  
47  
48  
49  
50  
51  
52  
53  
54  
55  
56  
57  
58  
59  
60

blood testing was done at the dispensary by finger prick, and we provided detailed medical examination and specific treatment. Parasitologically confirmed clinical malaria episodes were treated according to national guidelines. From 1990 to 2008, four different drug regimens were implemented: Quinine from 1990 to 1994, Chloroquine from 1995 to 2003, Fansidar (sulfadoxine-pyrimethamine) from 2004 to mid-2006 and Artemisinin-based combination therapy (ACT; Amodiaquine- sulfadoxine-pyrimethamine) from mid-2006 to 2008.

Parasite positivity was established as follows. Thick blood films were prepared and stained by 3% Giemsa stain. Blood films were examined under an oil immersion objective at x1000 magnification by the trained laboratory technicians and 200 thick film fields were examined to count the number of asexual and gametocyte parasite stages. Asexual parasite densities (per  $\mu\text{L}$ ) were calculated by establishing the ratio of parasites to white blood cells and then multiplying the parasite count by 8,000, the average white blood cell count per  $\mu\text{L}$  of blood.

Malaria transmission in Dielmo is intense and perennial. We conducted a cross-sectional survey to estimate the prevalence of symptoms related to allergic diseases among 175 children aged from 1 month to 14 years old below the age of 15 years who were born during the malaria research program.

Both the longitudinal and cross-sectional surveys were approved by the Ministry of Health of Senegal. Informed consent of the volunteers is renewed every year. More specifically for the cross-sectional survey, after informing about the procedures and the purpose of the study, written informed consent was obtained from parents or guardians of children either by signature or by thumbprint on a voluntary consent form written in both French and Wolof, the main local language. Consent was obtained in the presence of the school director, an independent witness.

The family structure (pedigree) was available after a demographic census performed for every volunteer at his adhesion in the project. A verbal interview of mothers or key representatives of the household was used to obtain information on genetic relationships between studied individuals, their children, their parents, and to identify genetic links among the population. The total pedigree comprised 828 individuals, including absent or dead relatives, composed of ten independent families that can be sub-divided into 206 nuclear families (father – mother couples with at least one child) with an average of 3.6

Formatted: Indent: First line: 0", Space After: 0 pt, Line spacing: 1.5 lines

Formatted: Space Before: 6 pt, After: 0 pt

Formatted: Font: Calibri, English (U.K.)

Formatted: Space Before: 6 pt, Line spacing: 1.5 lines

Formatted: Font: Calibri

Formatted: Font: Calibri, English (U.K.)

Formatted: Font: Calibri, English (U.K.)

children each. Genetically related nuclear families occur because of multiple marriages and marriages among related individuals. Previous typing with microsatellites has enabled the construction of a pedigree based on Identity-by-Descent using MERLIN.<sup>18,26</sup> The mean coefficient of inbreeding is 0.0008. Newborns since this original genetic analysis were added to the family of the parents in question. The 143 children, with both allergy and malaria data, belonged to 61 nuclear families and comprised 30 singletons, 102 siblings and 11 half-sibs (yielding 55 half-sib pairs). The mean genetic relatedness (by pedigree) of the 143 children is 0.0114 (range: 0.0013 to 0.022).

Formatted: Font: Calibri

Formatted: Font: Calibri, English (U.K.)

Formatted: Font: Calibri

Formatted: Font: Calibri, English (U.K.)

Formatted: Superscript

Formatted: Font: Calibri

Formatted: Font: Calibri

Formatted: Font: Calibri, English (U.K.)

#### *P. falciparum* clinical episodes

*P. falciparum* malaria clinical episode phenotypes analysed were: (i) clinical *P. falciparum* infections treated with anti-malarial therapy and (ii) the highest parasite density during the *P. falciparum* clinical episode. A clinical *P. falciparum* episode was defined as a clinical presentation with fever (axillary temperature  $\geq 37.5^{\circ}\text{C}$ ) and/or other clinical signs suggestive of malaria associated with a thick blood smear positive for *P. falciparum* and that was treated with anti-malarial therapy. The parasite density was measured from 200 microscope fields on a thick blood smear (0.25  $\mu\text{L}$  blood). Repeated clinical malaria presentations within 15 consecutive days were not considered to be independent and were excluded from the analyses, unless there was a negative thick blood smear between two clinical presentations. We also excluded observations in any trimester for which the individual was not present for at least one third of the time.

Formatted: Space Before: 6 pt, After: 0 pt

We calculated the quarterly incidence rate of clinical *P. falciparum* episodes in children below the age of 15 years as the ratio of the total number of clinical *P. falciparum* episodes during the trimester divided by the total number of person-trimesters surveyed. Incidence rate is expressed as cases per 100 person-trimesters (see Supplementary Figure S1). This rate was used in the analysis to approximate the force of infection (exposure level) within the targeted population at the time of a given clinical *P. falciparum* episode.

The total number of clinical presentations per trimester that were not attributable to *P. falciparum* was tabulated. Repeated non-malaria presentations within seven consecutive days were not considered to be independent and were excluded.

1  
2  
3  
4  
5  
6  
7  
8  
9  
10  
11  
12  
13  
14  
15  
16  
17  
18  
19  
20  
21  
22  
23  
24  
25  
26  
27  
28  
29  
30  
31  
32  
33  
34  
35  
36  
37  
38  
39  
40  
41  
42  
43  
44  
45  
46  
47  
48  
49  
50  
51  
52  
53  
54  
55  
56  
57  
58  
59  
60

*Allergic diseases and atopic status*

The International Study of Asthma and Allergies in Childhood (ISAAC) diagnostic criteria have been shown to be reproducible, adequate and able to discriminate children with allergic diseases in different areas of the world.<sup>2</sup> The standardized ISAAC questionnaire originally written in English was translated into French in compliance with ISAAC guidelines<sup>1527</sup>, adapting it to the usual local customs following advice from local clinicians and paediatric allergologists ([Acknowledgements and](#) Technical Appendix). The adequacy and reliability of the translated questionnaire had been previously confirmed by a pilot study on 30 randomly selected children in the same community. The questionnaire was completed by specially trained health workers during an oral interview conducted in Wolof with children and their mothers or guardians.

To assess the prevalence of allergic diseases in children, we used the positive and negative predictive values of the ISAAC questionnaire diagnosis criteria developed for subtropical countries.<sup>1628</sup> Each question was scored according to the medical diagnosis of paediatricians and paediatric allergologists. Positive or negative answers were thus graded on the basis of symptom sensitivity, specificity, frequency, location or early onset. For each allergic disease, three categories of symptom severity, *severe*, *moderate*, and *none*, were defined as follows:

*Asthma* – *severe* symptoms if the child had “wheezing or whistling in the chest before the age of two years” and “more than three times” or severe enough to “limit his/her speech”; *moderate* symptoms if the child had “wheezing or whistling in the chest before the age of two years” and “in the past 12 months”; and *none* otherwise.

*Allergic rhinoconjunctivitis* – *severe* symptoms if the child had “sneezing, runny or stuffy nose in the past 12 months” and “more than five times a year”, and “itchy, watery eyes or tropical endemic limboconjunctivitis (TELC) in the past 12 months”; *moderate* symptoms if the child had “sneezing, runny or stuffy nose in the past 12 months”, and “itchy, watery eyes or TELC in the past 12 months”; and *none* otherwise.

*Atopic dermatitis* – *severe* symptoms if the child had “scaly or exudating, crusted and pruritic patches in the past 12 months” and “affecting any of the following characteristic areas: face, around the ears or eyes, folds of armpits or elbows or groin, behind the knees, under the buttocks”, and “onset of symptoms before the age of two years”; *moderate* symptoms if the

Formatted: Space Before: 6 pt

child had “scaly or exudating, crusted and pruritic patches in the past 12 months” and “affecting any of characteristic areas (see above)”, and “onset of symptoms before the age of four years”; and *none* otherwise.

The inter-relationships between variables reflecting the severity of symptoms of the three allergic diseases were used to identify children at high risk of atopy. The *high probability* group was defined by the prevalence of at least one of any *severe* symptoms or two of any *moderate* symptoms. The *probable* group was defined as those with *moderate* symptoms from one of the three allergic diseases and remaining children were classified in the *unlikely* group.

#### Helminths

~~Helminthic infections are common in this region and are known to modify the clinical course\* and outcome of both allergic diseases and malaria.<sup>29,30</sup> We therefore carried out a~~ helminth survey ~~was carried out~~ for 91 individuals present during the cross-sectional survey. Diagnosis was performed by stool examination by microscope and by the Kato technique to search for the presence of *Ascaris lumbricoides*, hookworms (*Ancylostoma duodenale* and *Necator americanus*), whipworm (*Trichuris trichiura*), *Schistosoma mansoni*, and *Strongyloides stercoralis*. Examination for pinworms (*Enterobius vermicularis*) was performed by the anal scotch-test. An anti-helminthic treatment was proposed for all infested individuals.

#### Immunoglobulin E titres

Specific IgE titres were measured by ELISA as previously described.<sup>31,47</sup> A panel of allergens of potential pertinence to the three classes of allergy was used: (i) Salivary gland extracts (SGE) of two mosquito species present in the study cohorts, *Aedes aegypti* and *Anopheles gambiae sensu stricto*, and (ii) *P. falciparum* parasite extract were prepared as previously described<sup>31,47</sup>; (iii) House dust mite spp. *Dermatophagoides farinae* and *Dermatophagoides pteronyssinus*; (iv) a mix of pollen allergens from five ubiquitous gramineae spp. [Cock's-foot (*Dactylis glomerata*), Timothy grass (*Phleum pratense*), Sweet Vernal grass (*Anthoxanthum odoratum*), Perennial ryegrass (*Lolium perenne*), Kentucky Bluegrass (*Poa pratensis*)] (all from Stallergenes, France).

#### Statistical analysis

Formatted: Font: Calibri, 12 pt

Formatted: Space Before: 6 pt, After: 0 pt

Formatted: Font: 12 pt, Superscript

Formatted: Font: Calibri, 12 pt

1  
2  
3  
4  
5  
6  
7  
8  
9  
10  
11  
12  
13  
14  
15  
16  
17  
18  
19  
20  
21  
22  
23  
24  
25  
26  
27  
28  
29  
30  
31  
32  
33  
34  
35  
36  
37  
38  
39  
40  
41  
42  
43  
44  
45  
46  
47  
48  
49  
50  
51  
52  
53  
54  
55  
56  
57  
58  
59  
60

Statistical analyses were performed using R version 2.12.0 (The R Foundation for Statistical Computing, Vienna, Austria). To address the effect of allergic status on the risk of clinical *P. falciparum* episodes, we performed Generalized Linear Mixed Models (GLMM) extended to pedigree data using the *pedigreemm* package for R to account for the non-independence of individuals because of family relationships, shared house and for repeated measures from the same individual (Technical Appendix). Correlated individual effects due to familial relationships were taken into account by using the pedigree-based genetic relatedness matrix that contains the genetic covariance among all pairs of individuals in the study cohort and is calculated using the pedigree information.<sup>1832</sup> Shared house and repeated measures from the same individual were modelled as random effects. All random effects were assumed to be normally distributed, and conditional on these random effects, the dependent variable had: (i) a Binomial distribution when the studied phenotype was the occurrence of a clinical *P. falciparum* episode treated with anti-malarial therapy during a trimester, (ii) a Gaussian distribution when the studied phenotype was the logarithm of the maximum parasite density during a given clinical *P. falciparum* episode, and (iii) a Poisson distribution when the studied phenotype was the number of non-malaria episodes per trimester. The effects of allergy disease classes on these dependent variables were modelled as fixed effects. Allergy classes were reduced to two levels, *Severe* or *moderate* vs. *none* for analyses of asthma, atopic dermatitis and allergic rhinoconjunctivitis and *high probability* vs. *probable* and *unlikely* for atopic tendency. Co-variables included sickle cell trait<sup>1731</sup>, *gender*, number of days present on site during the trimester, trimestrial incidence of *P. falciparum* and age. Age was initially analysed as a continuous covariate. To assess the age-specific effect of allergy, age was categorised into two levels (<3.5 years of age and ≥3.5 years of age, based on the age of peak clinical incidence) and allergy class was nested within age class. The age threshold was varied from 1.5 years to 5.5 years of age and the data re-analysed to assess at which age there was the strongest effect. The association of allergy classes with IgE levels was analysed by box-cox transforming the data and fitting a GLMM with ~~Poisson~~ a normal distribution.

**Results**

Of the 205 eligible children aged under 15 years involved in the family-based longitudinal study, 175 (85.4 %) participated in the cross-sectional survey to assess the prevalence of related symptoms of allergic diseases. All eligible children present at the time of the survey were included; no explicit refusal to participate was recorded. The study cohort was aged from 1 month to 14 years 11 months. The sex-ratio (male/female) was 0.94.

From 1994 until 2008, 143 of the children participating in the cross-sectional survey were present for at least 31 days in any trimester during the study period generating a total of 3,093 person-trimesters of presence (Supplementary Table S1). There were 2,065 treated *P. falciparum* clinical episodes (median 11, range 0-47)(Supplementary Table S2). The age peak of incidence of *P. falciparum* episodes occurred at 3 to 4.5 years of age (Figure 1). There were 1,868 non-malaria episodes (median 12, range 0-37) (Supplementary Table S2). These non-malaria clinical presentations were associated with headache (38 %), chills (32 %), cough (13 %), vomiting (11 %) and diarrhoea (6 %).

The prevalence of moderate or severe asthma symptoms was respectively 2.3 % and 10.3 % (Table 1). The prevalence of moderate or severe allergic rhinoconjunctivitis symptoms was respectively 6.3 % and 10.3 %. The prevalence of moderate or severe atopic dermatitis symptoms was respectively 6.3 % and 2.9 %. On the basis of symptom severity, an atopic tendency was estimated to be unlikely for 68.0 %, probable for 9.1 % and highly probable for 22.9 % of the 175 children. The frequency of each allergy class in children for whom malaria data were available is shown in Table S1.

The risk of treated clinical *P. falciparum* infections was higher for children with high probability of atopy (OR 1.65, 95% confidence intervals 1.20 to 2.26;  $P=0.002$ ) (Table 2), after adjusting for age, sickle cell trait and the exposure level. Gender was not found to be significant. Analysing the impact of atopy in children younger and older than the peak age of clinical incidence (3 to 4.5 years old), revealed that atopy doubled-increased the risk of *P. falciparum* episodes in children at an age greater than 3.5 years (OR 2.02, 1.39 to 2.93;  $P=2 \times 10^{-4}$ ), but not in children of age prior to the peak clinical incidence (OR 1.38, 0.92 to 2.08;  $P=0.124$ ) (Table 2). This increased risk resulted in an ever increasing cumulative number of *P. falciparum* episodes with age beyond that of peak clinical incidence (Figure 2. See supplementary Figure S2 for model predictions for comparison).

1  
2  
3  
4  
5  
6  
7  
8  
9  
10  
11  
12  
13  
14  
15  
16  
17  
18  
19  
20  
21  
22  
23  
24  
25  
26  
27  
28  
29  
30  
31  
32  
33  
34  
35  
36  
37  
38  
39  
40  
41  
42  
43  
44  
45  
46  
47  
48  
49  
50  
51  
52  
53  
54  
55  
56  
57  
58  
59  
60

Analysis by allergy category revealed that asthma (severe or moderate) ~~doubled-increases~~ the risk of *P. falciparum* episodes (OR 2.12, 1.46 to 3.08;  $P= 8 \times 10^{-5}$ ) and this again only in children of age greater than 3.5 years old (OR 2.33, 1.50 to 3.61;  $P= 1.5 \times 10^{-4}$ ). Atopic dermatitis ~~tripled-increased~~ the risk of clinical malaria in children older (OR 3.15, 1.56 to 6.33;  $P= 1.3 \times 10^{-3}$ ) but not younger than 3.5 years of age (Table 2). Allergic rhinoconjunctivitis was not associated with increased risk of clinical malaria at any age (Table 2). The impact of atopy, asthma and atopic dermatitis can be clearly seen in the ever-increasing number of cumulative *P. falciparum* episodes beyond the age of the onset of clinical immunity in the population, 3.5 years of age (Figure 2). ~~There is no difference in the number of clinical malaria episodes prior to this age in individuals with or without an allergic condition. Analysis using different age thresholds (from 1.5 to 5.5 years of age) revealed similar OR for thresholds of 2.5, 3.5 and 4.5 years of age. The maximum OR for increased malaria occurred in children older than 4.5 years of age and with atopy or atopic dermatitis, whereas for the asthma group it occurred in children after 3.5 years of age (Supplementary Table S3). There is no difference in the number of clinical malaria episodes prior to this age in individuals with or without an allergic condition.~~

There was no impact of any allergic disease on the number of non-malaria episodes by trimester (~~Supplementary Table S43~~).

The impact of atopy, asthma and atopic dermatitis on the maximum *P. falciparum* parasite density during a given clinical malaria episode mirrored that of the risk of *P. falciparum* episodes. Parasite density was significantly higher for children with allergic disease older than 3.5 years of age (Table 3 ~~and supplementary Figure S3 for residuals of the fitted model~~). Allergic rhinoconjunctivitis had no impact on the parasite density (Table 3). ~~Analysis using different age thresholds yielded the same pattern as seen with the number of clinical episodes (Table S3).~~

Individuals with moderate or severe symptoms of atopic dermatitis had significantly higher specific IgE titres against *Ae. aegypti* ( $P=0.004$ ) and *An. gambiae* SGE ( $P<0.001$ ). There were no detectable specific anti-*P. falciparum* IgE. Individuals with moderate or severe symptoms of allergic rhinoconjunctivitis did not have significantly higher IgE titres against the tested gramineae ( $P=0.28$ ), although titres decreased with age ( $P=0.035$ ). There was also no effect of

asthma on IgE titres against the house dust mite spp. tested (*D. farinae* P=0.60 & *D. pteronyssinus* P=0.27).

Only five individuals were infested with helminths (two *Ancylostoma*, one *Strongyloides*, one *Trichuris* and one *Enterobius*).

## Discussion

### Principal findings

Establishing the allergic status of children up to the age of 15 years old followed for malaria since birth, revealed an association of asthma and atopic dermatitis with susceptibility to clinical *P. falciparum* episodes. Importantly the increase in risk of malaria associated with these allergic conditions occurred after the peak clinical incidence of disease in the population, suggesting that they delay the development of clinical immunity to malaria.

### Strengths and weaknesses of the study

The major strength of this study is the complete knowledge of the number of clinical *P. falciparum* malaria episodes each individual has had since birth and the exposure level per trimester over the 15 years covering the birth cohort. No other study has such detailed information for such a length of time. The major weakness of the study is the relatively small sample size, which would have reduced power to detect an association. In addition, although allergy diagnosis for children under 2 years of age is not considered reliable, there were only 15 individuals under 2 at the time of the allergy study of the 143 for whom malaria and allergy data were available.

### Meaning of the study

Under intense malaria transmission, after repeated exposure to the parasite, children develop a clinical immunity<sup>1933</sup>, whereby they tolerate elevated parasite densities without showing clinical symptoms. In this cohort, the population mean onset of clinical immunity occurred at 3 to 4.5 years of age. Although clinical immunity is accompanied by a reduction in parasite density, effective anti-parasite immunity develops much more slowly<sup>2034</sup> with individuals achieving a state of premunition, whereby they maintain low-grade parasite densities in an asymptomatic state.<sup>2135</sup> We show here that children with clinically defined

1  
2  
3  
4  
5  
6  
7  
8  
9  
10  
11  
12  
13  
14  
15  
16  
17  
18  
19  
20  
21  
22  
23  
24  
25  
26  
27  
28  
29  
30  
31  
32  
33  
34  
35  
36  
37  
38  
39  
40  
41  
42  
43  
44  
45  
46  
47  
48  
49  
50  
51  
52  
53  
54  
55  
56  
57  
58  
59  
60

asthma or atopic dermatitis had a two to three-fold increase in the risk of presenting with *P. falciparum* malaria episodes requiring treatment once passing the age of peak clinical incidence. They also had higher parasite density during clinical episodes, suggesting a reduced ability to control parasite replication. The observed increase in clinical incidence of malaria in patients with asthma or atopic dermatitis is not likely to be the result of increased frailty of such individuals; these individuals did not come more frequently to the clinic with non-malaria symptoms. Our previous genome linkage study identifying chromosomal regions<sup>818</sup> associated with malaria that overlap with those previously shown to be linked to asthma/atopy suggests that there may be a shared genetic basis to these pathologies rather than any causative effect of one on the other. This is consistent with the increased susceptibility to malaria of mouse atopic models.<sup>4021</sup>

**Comparison with other studies**

A previous study found that a history of malaria (yes/no) increased risk of atopic dermatitis in 306 cases compared to 426 controls as characterized using the ISAAC questionnaire<sup>920</sup>. The only other epidemiological study that has previously examined the link between malaria and atopy<sup>2236</sup> also interpreted the result from the perspective of the impact of malaria on atopy. They examined the re-infection rate with *P. falciparum* over a 5-year period in 91 children that were subsequently classified as atopic or not using skin prick tests (SPT) with house dust mite antigen. Their conclusion was that, as with measles<sup>2211</sup> and tuberculosis<sup>2413</sup>, malaria infection reduces atopy. However, the study lacked previous infection data since birth of the participating individuals and focussed on atopy as determined by SPT against a single allergen. The case-control study of atopic dermatitis risk factors cited above found no overall association between allergen skin sensitization and atopic dermatitis. We also found no evidence of increased IgE titres against house dust mites in the asthmatic or atopic dermatitis groups or against grass pollen in individuals with allergic rhinoconjunctivitis. Such differences likely reflect the different IgE reactivity profiles due to differences in allergen exposure in Africa.<sup>37</sup> There was no evidence of anti-parasite IgE in this cohort of children. We previously showed that circulating anti-parasite IgE titres were strongly positively correlated with anti-mosquito saliva IgE, but became undetectable following malaria exposure, potentially being bound to effector cells.<sup>31</sup> Only mosquito saliva, a known major local

allergen, induced a specific IgE response at significantly higher titres in individuals with atopic dermatitis.

Although the immune effectors of clinical immunity are still poorly defined, there is strong evidence that acquired anti-parasite immunity is IgG-dependent<sup>38</sup> and cytophilic immunoglobulins (IgG1 & IgG3), which are capable of eliminating the parasites by opsonisation and/or by Antibody Dependent Cellular Immunity play an important role in premunition.<sup>35</sup> The higher parasite density during symptomatic episodes observed in the asthma group suggests impaired development of acquired immunity. Impaired acquisition of immunity to malaria in children with asthma or atopic dermatitis may stem from their imbalanced Th1/Th2 response. Indeed, an atopic state may generate a tendency to develop a Th2 type immune response to *P. falciparum*. Dendritic cells that are oriented to a Th2 phenotype are more susceptible to orient the acquired immune response towards a Th2 profile.<sup>39</sup> Orientation of the immune response towards a Th2 profile by asthma or atopic dermatitis would result in a poor Th1 response (and hence development of protective IgG immunoglobulins), considered to be the dominant arm of the immune response enabling resistance to infectious disease in children.<sup>40</sup>

~~Such differences likely reflect the different IgE reactivity profiles due to differences in allergen exposure in Africa<sup>25</sup>.~~

Many studies have revealed an important role of histamine, a key downstream effector molecule in allergic reaction, in the outcome of a malaria parasite infection.<sup>22-24,41-43,41-44,26-39</sup>

Moreover, reports indicate that components of the innate immune system, including eosinophils, basophils, and mast cells (MCs), could play important roles in the pathogenesis of malaria.<sup>41,26</sup> Increased levels of histamine in plasma and tissue, derived from basophils and MCs, notably following stimulation by IgE through the high affinity receptor FcεR1, are associated with the severity of disease in humans infected with *P. falciparum* and in animal malaria models.<sup>23,42,24,43</sup> Chlorpheniramine, a H1 agonist reversed resistance to chloroquine and amodiaquine both *in vivo* and *in vitro*.<sup>42,27</sup> Moreover, astemizole, another H1 agonist, was identified as an anti-malarial agent in a clinical drug library screen.<sup>43,28</sup> Finally, *P. falciparum* produces translationally controlled tumor protein, which is a homolog of the mammalian histamine-releasing factor that causes histamine release from human basophils.<sup>44,29</sup>

1  
2  
3  
4  
5  
6  
7  
8  
9  
10  
11  
12  
13  
14  
15  
16  
17  
18  
19  
20  
21  
22  
23  
24  
25  
26  
27  
28  
29  
30  
31  
32  
33  
34  
35  
36  
37  
38  
39  
40  
41  
42  
43  
44  
45  
46  
47  
48  
49  
50  
51  
52  
53  
54  
55  
56  
57  
58  
59  
60

**Further research**

Our results provide the first birth cohort study addressing the link between malaria and allergic diseases. They contribute to a growing body of evidence that the pathologies are related. ISAAC has revealed a steady but significant increase in prevalence rates of asthma and allergic diseases in Africa. Whilst the majority of studies have focused on large cities, there is increasing urbanization throughout Africa, as well as improved access to primary health care in many areas. A key concern for ISAAC is the extent to which such societal evolution will result in an increase in allergic diseases. Increased urbanization in sub-Saharan Africa is changing the epidemiology of malaria and although resulting in a decrease in risk, will result in more severe clinical malaria in older individuals.<sup>45,46,30-31</sup> Moreover, a large consumption of anti-malarial drugs in the urban areas provides substantial drug pressure fostering, the selection of drug-resistant parasites. Despite the encouraging recent decrease in malaria incidence rates, even in rural areas, an additional significant concern is the extent to which such an increase in allergy will exacerbate the burden of malaria. Given the demonstrated anti-parasitic effect of anti-histamines<sup>47,22</sup>, administration of anti-histamines to atopic children will likely reduce the burden of clinical malaria in these children, increase the efficacy of first-line treatment anti-malarials<sup>48,22</sup> and alleviate the non-infectious consequences of atopy. Clinical intervention studies should be envisaged.

**What is already known on this topic**

There are several reports of the beneficial effects of anti-histamines for malaria chemoprophylaxis<sup>22-24,11-13,47,32</sup> as well as our previous work<sup>8,18</sup> showing that chromosomal regions associated with malaria are also linked to allergy and atopy.<sup>155-17</sup> There are two epidemiological studies showing opposite effects of malaria on atopy.<sup>209,36,22</sup>

**What this study adds**

Using a longitudinal malaria study birth cohort, we identified an association of asthma and atopic dermatitis with susceptibility to clinical *P. falciparum* episodes. Importantly the increase in risk of malaria associated with these allergic conditions occurred only after the peak clinical incidence of disease in the population, suggesting that they delay the development of clinical immunity to malaria.

We are grateful to the villagers of Dielmo for their participation and sustained collaboration in this project as well as the field workers (Abdoulaye Badiane) and the data manager (Joseph Faye) for their contribution to the project and in generating and maintaining the malaria database. We are indebted to Michel Thiakane, a paediatric allergologist, head of the Paediatric Service, Principal hospital, Dakar, Senegal and Marie-Thérèse Guinnepain, dermatologist, Institut Pasteur clinic, Paris, France for aid in elaborating the ISAAC questionnaire and advising on clinical diagnosis of allergy in Senegal. We specially thank the children and parents or guardians who participated in the cross-sectional survey 'Pallergo'. We thank the International Division of the Institut Pasteur that has given full support to this study.

Formatted: English (U.K.)

Formatted: English (U.K.)

STROBE: This article has been prepared according to the STROBE checklist guidelines.

Funding: Institut Pasteur de Dakar, Institut Pasteur and Agence Nationale de la Recherche, France (ANR 11-BSV1-027-01). The funding source had no role in study design, data collection, data analysis, data interpretation, or writing of the report. The corresponding author had full access to all the data in the study and had final responsibility for the decision to submit for publication.

Contributors: LB, SM, and RP made substantial contributions to the concept and design of the study. MH, HB, BG, SB, FDS, and AT were involved in acquisition of the data. CL, AF, OMP, AS and RP contributed to the analysis and interpretation of the data. MH, CL, HB, BG, SB, FDS, AF, AT, LB, OMP, SM, AS and RP critically reviewed the report and approved its final version for submission. All authors had full access to all of the data in the study and can take responsibility for the integrity of the data and the accuracy of the data analysis. MH and RP are guarantors.

Competing interests: All authors have completed the ICMJE uniform disclosure form at [www.icmje.org/coi\\_disclosure.pdf](http://www.icmje.org/coi_disclosure.pdf) (available on request from the corresponding author) and declare: no financial relationships with any organisations that might have an interest in the submitted work in the previous three years; no other relationships or activities that could appear to have influenced the submitted work.

1  
2  
3  
4  
5  
6  
7  
8  
9  
10  
11  
12  
13  
14  
15  
16  
17  
18  
19  
20  
21  
22  
23  
24  
25  
26  
27  
28  
29  
30  
31  
32  
33  
34  
35  
36  
37  
38  
39  
40  
41  
42  
43  
44  
45  
46  
47  
48  
49  
50  
51  
52  
53  
54  
55  
56  
57  
58  
59  
60

Ethical approval: The allergy study was approved by the Senegalese National Ethics committee (2009/N°46). Renewed approval of the longitudinal malaria study was obtained from the same committee (2006/N°969).

Data sharing: The allergy database will be made available on-line. The longitudinal malaria data set will be made available following discussion with the coordinators of the three Institutes that govern the dataset through contact with the corresponding author.

Copyright: The Corresponding Author has the right to grant on behalf of all authors and does grant on behalf of all authors, a worldwide licence to the Publishers and its licensees in perpetuity, in all forms, formats and media (whether known now or created in the future), to i) publish, reproduce, distribute, display and store the Contribution, ii) translate the Contribution into other languages, create adaptations, reprints, include within collections and create summaries, extracts and/or, abstracts of the Contribution, iii) create any other derivative work(s) based on the Contribution, iv) to exploit all subsidiary rights in the Contribution, v) the inclusion of electronic links from the Contribution to third party material where-ever it may be located; and, vi) licence any third party to do any or all of the above.

References

1. WAO, World Allergy Organization - <http://www.worldallergy.org/index.php>. 2010.

2. Asher MI, Montefort S, Björkstén B, Lai CK, Strachan DP, Weiland SK, et al. Worldwide time trends in the prevalence of symptoms of asthma, allergic rhinoconjunctivitis, and eczema in childhood: ISAAC Phases One and Three repeat multicountry cross-sectional surveys. *Lancet* 2006; 368: 733-43.

3. Mosmann TR, Coffman RL. TH1 and TH2 cells: different patterns of lymphokine secretion lead to different functional properties. *Ann Rev Immunol* 1989; 7: 145-73.

4. Zhu J, Paul WE. CD4 T cells: fates, functions, and faults. *Blood* 2008; 112: 1557-69.

5. Elghazali G, Perlmann H, Rutta AS, Perlmann P, Troye-Blomberg M. Elevated plasma levels of IgE in *Plasmodium falciparum*-primed individuals reflect an increased ratio of IL-4 to interferon-gamma (IFN-gamma)-producing cells. *Clin Exp Immunol* 1997; 109: 84-9.

Formatted: Font: (Default) Calibri, 12 pt

Formatted: Font: (Default) Calibri, 12 pt

Formatted: Font: (Default) Calibri, 12 pt

Formatted: Justified, Space Before: 6 pt, Line spacing: 1.5 lines

Formatted: Font: (Default) Calibri, 12 pt,

Formatted: Font: (Default) Calibri, 12 pt

Formatted: Font: (Default) Calibri, 12 pt

Formatted: Font: (Default) Calibri, 12 pt

Formatted: Font: Italic

Formatted: Font: Italic

Formatted: Font: Italic

63. Perlmann P, Perlmann H, ElGhazali G, Blomberg MT. IgE and tumor necrosis factor in malaria infection. *Immunol Lett* 1999; 65: 29-33.
7. Tangteerawatana P, Perlmann H, Hayano M, Kalambaheti T, Troye-Blomberg M, Khusmith S. IL4 gene polymorphism and previous malaria experiences manipulate anti-*Plasmodium falciparum* antibody isotype profiles in complicated and uncomplicated malaria. *Malaria J* 2009 ; 8: 286-95.
84. Taylor-Robinson AW. Malaria-specific IgE as a risk factor for cancer and atopy. *Am J Trop Med Hyg* 1998; 59: 181.
9. Stein RT, Sherrill D, Morgan WJ, Holberg CJ, Halonen M, Taussig LM et al. Respiratory syncytial virus in early life and risk of wheeze and allergy by age 13 years. *Lancet* 1999; 354: 541-5.
10. Sigurs N, Gustafsson PM, Bjarnason R, Lundberg F, Schmidt S, Sigurbergsson F et al. Severe respiratory syncytial virus bronchiolitis in infancy and asthma and allergy at age 13. *Am J Resp Crit Care Med* 2005; 171: 137-41.
11. Shaheen SO, Aaby P, Hall AJ, Barker DJ, Heyes CB, Shiell AW, et al. Measles and atopy Guinea-Bissau. *Lancet* 1996; 347: 1792-96.
12. McIntire JJ, Umetsu SE, Macaubas C, Hoyte EG, Cinnioğlu C, Cavalli-Sforza LL et al. Immunology: hepatitis A virus link to atopic disease. *Nature* 2003; 425: 576.
13. Shirakawa T, Enomoto T, Shimazu S, Hopkin JM. The inverse association between tuberculin responses and atopic disorder. *Science* 1997; 275: 77-9.
14. Gould HJ, Takhar P, Harries HE, Chevetton E, Sutton BJ. The allergic march from *Staphylococcus aureus* superantigens to immunoglobulin E. *Chem Immunol Allergy* 2007; 93: 106-36.
15. Jang N, Stewart G, Jones G. Polymorphisms within the PHF11 gene at chromosome 13q14 are associated with childhood atopic dermatitis. *Genes Immun* 2005; 6: 262-4.
16. Kurz T, Hoffjan S, Hayes MG, Schneider D, Nicolae R, Heinzmann A, et al. Fine mapping and positional candidate studies on chromosome 5p13 identify multiple asthma susceptibility loci. *J Allergy Clin Immunol* 2006; 118: 396-402.

Formatted: Font: Italic

Formatted: Justified, Indent: Left: 0", Hanging: 0.5", Space Before: 6 pt, Line spacing: 1.5 lines

Formatted: Font: Calibri, 12 pt, Italian (Italy)

Formatted: Font: Calibri, 12 pt

Formatted: Font: Calibri, 12 pt, Italian (Italy)

Formatted: Font: Calibri, 12 pt, Italic, Italian (Italy)

Formatted: Font: Calibri, 12 pt, Italian (Italy)

Formatted: Font: Calibri, 12 pt, Not Highlight

Formatted: Font: Calibri, 12 pt

Formatted: Font: Calibri, 12 pt, Not Highlight

Formatted: Italian (Italy)

Formatted: Font: Italic

Formatted: Not Highlight

Formatted: Font: Italic

Formatted: Font: Italic

17. Zhang Y, Leaves NI, Anderson GG, Ponting CP, Broxholme J, Holt R, et al. Positional cloning of a quantitative trait locus on chromosome 13q14 that influences immunoglobulin E levels and asthma. *Nat Genet* 2003; 34: 181-6.

18. Sakuntabhai A, Ndiaye R, Casademont I, Peerapittayamongkol C, Rogier C, Tortevoe P, et al. Genetic determination and linkage mapping of *Plasmodium falciparum* malaria related traits in Senegal. *PLoS ONE* 2008; 3: e2000.

19. Cargill M, Schrod SJ, Chang M, Garcia VE, Brandon R, et al. A large-scale genetic association study confirms IL12B and leads to the identification of IL23R as psoriasis-risk genes. *Am J Hum Genet* 2007; 80: 273-90.

209. Haileamlak A, Dagoye D, Williams H, Venn AJ, Hubbard R, Britton J, et al. Early life risk factors for atopic dermatitis in Ethiopian children. *J Allergy Clin Immunol* 2005; 115: 370-6.

214. Kohara Y, Tanabe K, Matsuoka K, Kanda N, Matsuda H, Karasuyama H, et al. A major determinant quantitative-trait locus responsible for atopic dermatitis-like skin lesions in NC/Nga mice is located on Chromosome 9. *Immunogenetics* 2001; 53: 15-21.

224. Beghdadi W, Porcherie A, Schneider BS, Dubayle D, Peronet R, Huerre M, et al. Inhibition of histamine-mediated signaling confers significant protection against severe malaria in mouse models of disease. *J Exp Med* 2008; 205: 395-408.

234. Srichaikul T, Archararit N, Siriasawakul T, Viriyapanich T. Histamine changes in *Plasmodium falciparum* malaria. *Trans R Soc Trop Med Hyg* 1976; 70: 36-8.

244. Bhattacharya U, Roy S, Kar PK, Sarangi B, Lahiri SC. Histamine & kinin system in experimental malaria. *Indian J Med Res* 1988; 88: 558-63.

254. Trape JF, Tall A, Diagne N, Ndiath O, Ly AB, Faye J, et al. Malaria morbidity and pyrethroid resistance after the introduction of insecticide-treated bednets and artemisinin-based combination therapies: a longitudinal study. *Lancet Infect Dis* 2011; 11: 925-32.

26. Abecasis GR, Cherny SS, Cookson WO, Cardon LR. Merlin-- rapid analysis of dense genetic maps using sparse gene flow trees. *Nat Genet* 2001; 30: 97-101.

Formatted: English (U.K.)

Formatted: Font: Italic

Formatted: Font: Italic

- ~~27~~<sup>15</sup>. Asher MI, Keil U, Anderson HR, Beasley R, Crane J, Martinez F, et al. International Study of Asthma and Allergies in Childhood (ISAAC): rationale and methods. *Eur Respir J* 1995; 8: 483-91.
- ~~28~~<sup>16</sup>. Yamada E, Vanna AT, Nasпитz CK, Solé D. International Study of Asthma and Allergies in Childhood (ISAAC): validation of the written questionnaire (eczema component) and prevalence of atopic eczema among Brazilian children. *J Investig Allergol Clin Immunol* 2002; 12: 34-41.
- ~~29~~. Nacher M. Malaria vaccine trials in a wormy world. *Trends Parasitol* 2001; 17: 563-5.
- ~~30~~. Yazdanbakhsh M, Kremsner PG, van Ree R. Allergy, parasites, and the hygiene hypothesis. *Science* 2002; 296: 490-4.
- ~~31~~<sup>17</sup>. Lawaly R, Konate L, Marrama L, Dia I, Diallo D, Diène Sarr F, et al. Impact of mosquito bites on asexual parasite density and gametocyte prevalence in asymptomatic chronic *Plasmodium falciparum* infections and correlation with IgE and IgG titres. *Infection and Immunity* 2012; 80: 2240-6.
- ~~32~~<sup>18</sup>. Machado A, Loucoubar C, Grange L, Bureau JF, Sakuntabhai A, Paul R. Human genetic contribution to the outcome of infection with malaria parasites. In: *MALARIA PARASITES*, ISBN: 979-953-307-072-7, Okwa O (Ed.), INTECH, Rijeka 2012; 267-292.
- ~~33~~<sup>19</sup>. Doolan DL, Dobaño C, Baird JK. Acquired Immunity to Malaria. *Clin Microbiol Rev* 2009; 22: 13-36.
- ~~34~~<sup>20</sup>. Marsh K, Snow RW. Host-parasite interaction and morbidity in malaria endemic areas. *Philos Trans R Soc London B* 1997; 352: 1385-94.
- ~~35~~<sup>21</sup>. Perignon JL, Druilhe P. Immune mechanisms underlying the premonition against *Plasmodium falciparum* malaria. *Mem Inst Oswaldo Cruz* 1994; 89 Suppl. 2: 51-3.
- ~~36~~<sup>22</sup>. Lell B, Borrmann S, Yazdanbakhsh M, Kremsner PG. Atopy and malaria. *Wien Klin Wochenschr* 2001; 113: 927-9.
- ~~23~~. Shaheen SO, Aaby P, Hall AJ, Barker DJ, Heyes CB, Shiell AW, et al. Measles and atopy in Guinea-Bissau. *Lancet* 1996; 347: 1792-6.

Formatted: Font: Calibri, 12 pt

Formatted: Font: Calibri, 12 pt

Formatted: Justified, Space Before: 6 pt, Line spacing: 1.5 lines

Formatted: Font: Calibri, 12 pt, Italic

Formatted: Font: Calibri, 12 pt, Highlight

Formatted: Font: Calibri, 12 pt

Formatted: Justified, Indent: Left: 0", Hanging: 0.5", Space Before: 6 pt, Line spacing: 1.5 lines

Formatted: Font: Calibri, 12 pt, Italic

Formatted: Font: Calibri, 12 pt

Formatted: Danish

1  
2  
3  
4  
5  
6  
7  
8  
9  
10  
11  
12  
13  
14  
15  
16  
17  
18  
19  
20  
21  
22  
23  
24  
25  
26  
27  
28  
29  
30  
31  
32  
33  
34  
35  
36  
37  
38  
39  
40  
41  
42  
43  
44  
45  
46  
47  
48  
49  
50  
51  
52  
53  
54  
55  
56  
57  
58  
59  
60

~~24.~~ Shirakawa T, Enomoto T, Shimazu S, Hopkin JM. The inverse association between tuberculin responses and atopic disorder. *Science* 1997; 275: 77-9.

~~37~~~~25.~~ Westritschnig K, Sibanda E, Thomas W, Auer H, Aspöck H, Pittner G, et al. Analysis of the sensitization profile towards allergens in central Africa. *Clin Exp Allergy* 2003; 33: 22-7.

~~38.~~ Cohen S, McGregor IA, Carrington S. Gamma-globulin and acquired immunity to human malaria. *Nature* 1961; 192: 733-7.

~~39.~~ de Jong EC, Vieira PL, Kalinski P, Schuitemaker JH, Tanaka Y, Wierenga EA, et al. Microbial compounds selectively induce Th1 cell-promoting or Th2 cell-promoting dendritic cells *in vitro* with diverse Th cell-polarizing signals. *J Immunol* 2002; 168: 1704-9.

~~40.~~ Baird JK. Age-dependent characteristics of protection versus susceptibility to *Plasmodium falciparum*. *Ann Trop Med Parasitol* 1998; 92: 367-90.

~~41~~~~26.~~ Mecheri S. Contribution of allergic inflammatory response to the pathogenesis of malaria disease. *Biochim Biophys Acta* 2011; 1822: 49-56.

~~42~~~~27.~~ Sowunmi A, Gbotosho GO, Happi CT, Adedeji AA, Bolaji OM, Fehintola FA, et al. Enhancement of the antimalarial efficacy of amodiaquine by chlorpheniramine *in vivo*. *Mem Inst Oswaldo Cruz* 2007; 102: 417-9.

~~43~~~~28.~~ Chong CR, Chen X, Shi L, Liu JO, Sullivan DJ. A clinical drug library screen identifies astemizole as an antimalarial agent. *Nat Chem Biol* 2006; 2: 415-416.

~~44~~~~29.~~ MacDonald SM, Bhisutthibhan J, Shapiro TA, Rogerson SJ, Taylor TE, Tembo M, et al. Immune mimicry in malaria: *Plasmodium falciparum* secretes a functional histamine-releasing factor homolog *in vitro* and *in vivo*. *Proc Natl Acad Sci USA* 2001; 98: 10829-10832.

~~45~~~~30.~~ De Silva PM, Marshall JM. Factors contributing to urban malaria transmission in sub-saharan Africa: a systematic review. *J Trop Med* 2012; doi: 10.1155/2012/819563.

~~46~~~~31.~~ Bob NS, Diop BM, Renaud F, Marrama L, Durand P, Tall A, et al. Parasite polymorphism and severe malaria in Dakar (Senegal): a West African urban area. *PLoS One* 2010; 5(3): e9817.

Formatted: Space Before: 6 pt

Formatted: English (U.K.)

Formatted: Font: Not Bold, English (U.K.)

Formatted: English (U.K.)

Formatted: English (U.K.)

Formatted: English (U.K.)

Formatted: Font: Not Bold

Formatted: Font: Not Bold

- 1  
2  
3  
4  
5  
6  
7 | 4732. Musonda CC, Whitlock GA, Witty MJ, Brun R, Kaiser M. Chloroquine-astemizole  
8 hybrids with potent *in vitro* and *in vivo* antiparasmodial activity. *Bioorg Med Chem Lett*  
9 2009; 19: 481-4.  
10  
11 | 4833. Egan TJ, Kaschula CH. Strategies to reverse drug resistance in malaria. *Curr Opin*  
12 *Infect Dis* 2007; 20: 598-604.  
13  
14  
15  
16  
17  
18  
19  
20  
21  
22  
23  
24  
25  
26  
27  
28  
29  
30  
31  
32  
33  
34  
35  
36  
37  
38  
39  
40  
41  
42  
43  
44  
45  
46  
47  
48  
49  
50  
51  
52  
53  
54  
55  
56  
57  
58  
59  
60

1  
2  
3  
4  
5  
6  
7  
8  
9  
10  
11  
12  
13  
14  
15  
16  
17  
18  
19  
20  
21  
22  
23  
24  
25  
26  
27  
28  
29  
30  
31  
32  
33  
34  
35  
36  
37  
38  
39  
40  
41  
42  
43  
44  
45  
46  
47  
48  
49  
50  
51  
52  
53  
54  
55  
56  
57  
58  
59  
60

**Table 1 Classification of Asthma, Allergic rhinoconjunctivitis, Atopic dermatitis and overall Atopic status according to ISAAC questionnaire in children aged 0-14 from a malaria birth cohort.** N is total number of children examined and n-malaria represents those for whom malaria data were recorded. F is the number of females and M the number of males.

|                                     | N (F/M)     | %     | n-malaria (F/M) | Formatted: English (U.K.) |
|-------------------------------------|-------------|-------|-----------------|---------------------------|
| <b>Asthma symptoms</b>              |             |       |                 |                           |
| None                                | 153 (73/80) | 87.43 | 125 (59/66)     | Formatted: English (U.K.) |
| Moderate                            | 4 (1/3)     | 2.29  | 4 (1/3)         | Formatted: English (U.K.) |
| Severe                              | 18 (6/12)   | 10.29 | 14 (4/10)       | Formatted: English (U.K.) |
| <b>Rhinoconjunctivitis symptoms</b> |             |       |                 |                           |
| None                                | 146 (64/82) | 83.43 | 120 (52/68)     | Formatted: English (U.K.) |
| Moderate                            | 11 (8/3)    | 6.29  | 9 (6/3)         | Formatted: English (U.K.) |
| Severe                              | 18 (6/12)   | 10.29 | 14 (6/8)        | Formatted: English (U.K.) |
| <b>Atopic dermatitis symptoms</b>   |             |       |                 |                           |
| None                                | 159 (75/84) | 90.86 | 128 (60/68)     | Formatted: English (U.K.) |
| Moderate                            | 11 (1/10)   | 6.29  | 11 (1/10)       | Formatted: English (U.K.) |
| Severe                              | 5 (4/1)     | 2.86  | 4 (3/1)         | Formatted: English (U.K.) |
| <b>Atopic tendency</b>              |             |       |                 |                           |
| Unlikely                            | 119 (56/63) | 68.00 | 97 (46/51)      | Formatted: English (U.K.) |
| Probable                            | 16 (8/8)    | 9.14  | 14 (6/8)        | Formatted: English (U.K.) |
| Highly probable                     | 40 (16/24)  | 22.86 | 32 (12/20)      |                           |

**Table 2 Impact of allergy status on risk of *P. falciparum* clinical episodes.** Shown are the *P* values and adjusted Odds Ratios with 95% confidence intervals calculated from the mixed model analyses. Values for the covariables Age ( $\geq 3.5$  years of age compared to  $< 3.5$  years of age), Trimestrial incidence of *P. falciparum* clinical episodes and HbAS (beta-globin sickle cell trait; AS compared to AA) are those from the Asthma model analysis. For clarity significant co-variables are shown in bold.

|                       | Age groups $< 3.5$ years     | ORa         | 95% Confidence Intervals |             | <i>P</i> value                          |
|-----------------------|------------------------------|-------------|--------------------------|-------------|-----------------------------------------|
|                       |                              |             | Lower                    | Upper       |                                         |
| Atopy                 | <b>Both</b>                  | <b>1.65</b> | <b>1.20</b>              | <b>2.26</b> | <b><math>2.0 \times 10^{-3}</math></b>  |
|                       | $< 3.5$                      | 1.38        | 0.92                     | 2.08        | 0.124                                   |
|                       | <b><math>\geq 3.5</math></b> | <b>2.02</b> | <b>1.39</b>              | <b>2.93</b> | <b><math>2.1 \times 10^{-4}</math></b>  |
| Asthma                | <b>Both</b>                  | <b>2.12</b> | <b>1.46</b>              | <b>3.08</b> | <b><math>8.0 \times 10^{-5}</math></b>  |
|                       | $< 3.5$                      | 1.50        | 0.90                     | 2.50        | 0.122                                   |
|                       | <b><math>\geq 3.5</math></b> | <b>2.33</b> | <b>1.50</b>              | <b>3.61</b> | <b><math>1.5 \times 10^{-4}</math></b>  |
| Atopic dermatitis     | Both                         | 1.05        | 0.65                     | 1.70        | 0.842                                   |
|                       | $< 3.5$                      | 0.84        | 0.49                     | 1.46        | 0.539                                   |
|                       | <b><math>\geq 3.5</math></b> | <b>3.15</b> | <b>1.56</b>              | <b>6.33</b> | <b><math>1.3 \times 10^{-3}</math></b>  |
| Rhinoconjunctivitis   | Both                         | 0.96        | 0.65                     | 1.41        | 0.818                                   |
|                       | $< 3.5$                      | 1.05        | 0.64                     | 1.72        | 0.853                                   |
|                       | $\geq 3.5$                   | 0.95        | 0.60                     | 1.52        | 0.834                                   |
| <hr/>                 |                              |             |                          |             |                                         |
| Age $\geq 3.5$        |                              | <b>0.48</b> | <b>0.40</b>              | <b>0.57</b> | <b><math>2.7 \times 10^{-15}</math></b> |
| Trimestrial incidence |                              | <b>1.01</b> | <b>1.00</b>              | <b>1.01</b> | <b><math>1.8 \times 10^{-6}</math></b>  |
| HbAS                  |                              | <b>0.24</b> | <b>0.12</b>              | <b>0.47</b> | <b><math>3.7 \times 10^{-5}</math></b>  |

1  
2  
3  
4  
5  
6  
7  
8  
9  
10  
11  
12  
13  
14  
15  
16  
17  
18  
19  
20  
21  
22  
23  
24  
25  
26  
27  
28  
29  
30  
31  
32  
33  
34  
35  
36  
37  
38  
39  
40  
41  
42  
43  
44  
45  
46  
47  
48  
49  
50  
51  
52  
53  
54  
55  
56  
57  
58  
59  
60

**Table 3 Impact of allergy status on the maximum *P. falciparum* parasite density during a clinical malaria episode.** Shown are the back-transformed mean parasite densities per microlitre and standard errors (SEM) estimated from the GLMM analyses after taking into account the other co-variables. Significantly different effects are shown in bold for clarity.

| Allergic condition  | Age groups  | Allergic status<br>(No/Yes) | Mean parasite density | SEM  | P value                     |
|---------------------|-------------|-----------------------------|-----------------------|------|-----------------------------|
| Atopy               | <b>Both</b> | <b>N</b>                    | <b>76.3</b>           | 13.8 | <b>0.0158</b>               |
|                     |             | <b>Y</b>                    | <b>131.0</b>          | 36.4 |                             |
|                     | <3.5        | N                           | 114.3                 | 23.7 | 0.148                       |
|                     |             | Y                           | 171.1                 | 56.0 |                             |
|                     | <b>≥3.5</b> | <b>N</b>                    | <b>48.4</b>           | 9.8  | <b>9.5x10<sup>-4</sup></b>  |
|                     |             | <b>Y</b>                    | <b>114.8</b>          | 37.1 |                             |
| Asthma              | <b>Both</b> | <b>N</b>                    | <b>78.1</b>           | 14.4 | <b>3.8 x10<sup>-3</sup></b> |
|                     |             | <b>Y</b>                    | <b>148.5</b>          | 44.3 |                             |
|                     | <3.5        | N                           | 114.8                 | 24.3 | 0.167                       |
|                     |             | Y                           | 171.9                 | 74.5 |                             |
|                     | <b>≥3.5</b> | <b>N</b>                    | <b>51.3</b>           | 9.7  | <b>6.2 x10<sup>-3</sup></b> |
|                     |             | <b>Y</b>                    | <b>105.3</b>          | 41.0 |                             |
| Atopic dermatitis   | Both        | N                           | 82.6                  | 15.0 | 0.605                       |
|                     |             | Y                           | 93.9                  | 38.9 |                             |
|                     | <3.5        | N                           | 122.6                 | 25.5 | 0.425                       |
|                     |             | Y                           | 133.9                 | 63.5 |                             |
|                     | <b>≥3.5</b> | <b>N</b>                    | <b>52.3</b>           | 11.0 | <b>0.014</b>                |
|                     |             | <b>Y</b>                    | <b>135.4</b>          | 70.7 |                             |
| Rhinoconjunctivitis | Both        | N                           | 81.5                  | 14.8 | 0.570                       |
|                     |             | Y                           | 111.4                 | 39.0 |                             |
|                     | <3.5        | N                           | 118.8                 | 25.1 | 0.537                       |
|                     |             | Y                           | 166.3                 | 69.9 |                             |
|                     | <b>≥3.5</b> | <b>N</b>                    | <b>54.6</b>           | 11.3 | 0.327                       |
|                     |             | <b>Y</b>                    | <b>80.9</b>           | 33.7 |                             |

**Figure 1** Annual incidence rate of clinical *P. falciparum* episodes per 100 children (~~solid~~**bold** line). In order to overcome the fluctuations of the annual incidence rate, we fit ~~second~~ (**dotted** line), ~~third~~ (**dashed** line) and ~~fourth~~ (**solid** line) degree polynomial trend lines to the data (**bold** line). The corresponding R-squared values are 0.70, 0.91 and 0.99 respectively indicating an accurate fit for third and fourth order polynomials. The inflexion on these two trend lines indicates the onset of acquisition of clinical immunity at approximately 3 to 4 years of age.~~a fourth-degree polynomial trendline to the data (dashed line). The corresponding R-squared value is 0.9855 indicating an accurate fit. The inflexion on the trendline indicates the onset of acquisition of clinical immunity at approximately 3-5 years of age.~~

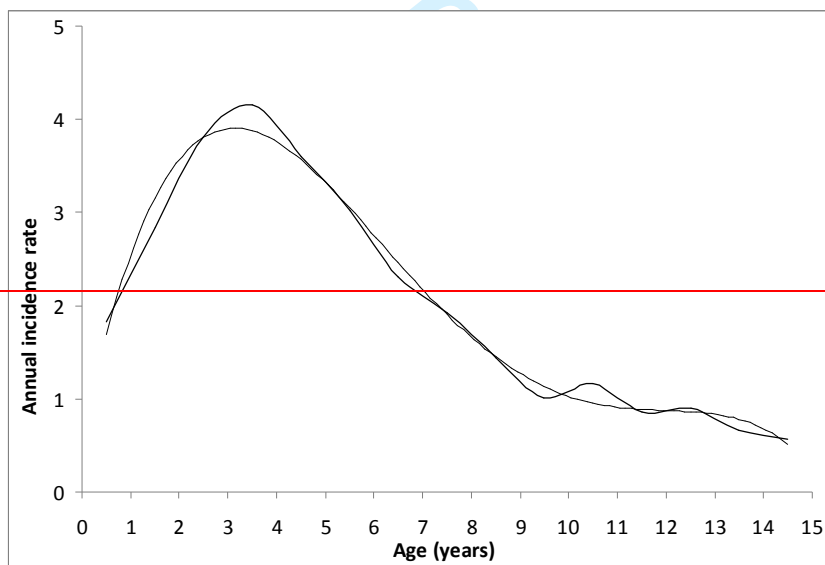

1  
2  
3  
4  
5  
6  
7  
8  
9  
10  
11  
12  
13  
14  
15  
16  
17  
18  
19  
20  
21  
22  
23  
24  
25  
26  
27  
28  
29  
30  
31  
32  
33  
34  
35  
36  
37  
38  
39  
40  
41  
42  
43  
44  
45  
46  
47  
48  
49  
50  
51  
52  
53  
54  
55  
56  
57  
58  
59  
60

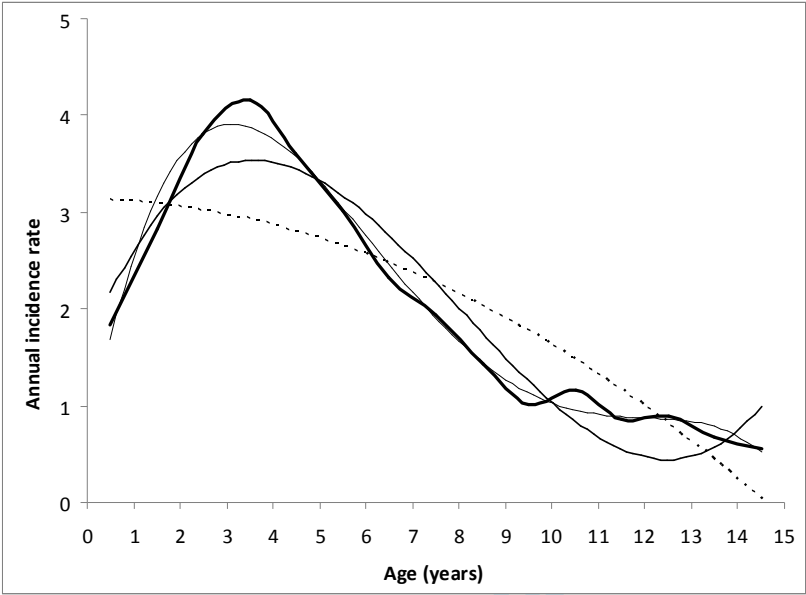

**Figure 2** Mean cumulative number of *P. falciparum* clinical episodes with age for the (A) Asthma, (B) Rhinoconjunctivitis and (C) Atopic dermatitis classes and overall Atopy class (D) (bold lines) compared to individuals without symptoms of each respective allergy type (fine-thin lines). In all cases moderate and severe classes are combined and compared to individuals without allergy symptoms. Note there are no children older than 11 years of age with Atopic dermatitis.

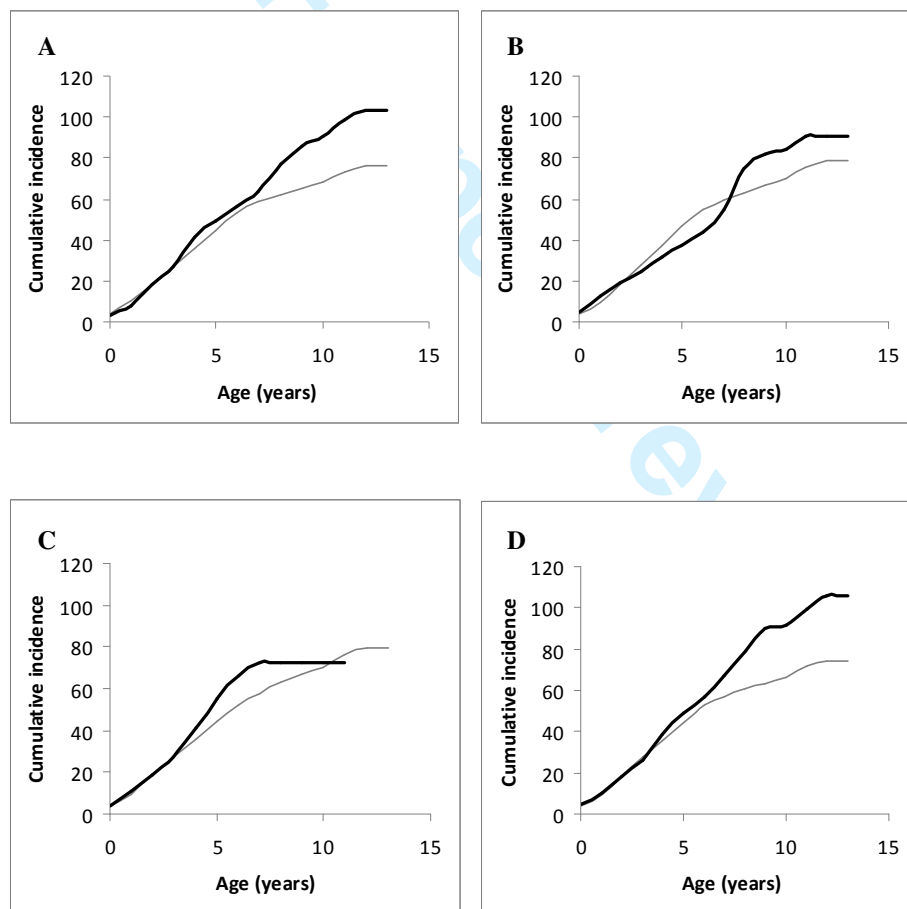

|                                                                                                            |                                                                                   |            |             |
|------------------------------------------------------------------------------------------------------------|-----------------------------------------------------------------------------------|------------|-------------|
| 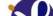<br><b>INSTITUT PASTEUR</b> | <b>Unit of Functional Genetics of Infectious Disease</b><br><b>ENREGISTREMENT</b> | Coding :   |             |
|                                                                                                            |                                                                                   | 03/MM/YYYY | Version : 1 |
| <b>ALLERGY MODIFIED ISAAC QUESTIONNAIRE</b>                                                                |                                                                                   |            |             |

| <b>Place of study</b>                                                               | <b>Research Institute responsible</b>                                               |
|-------------------------------------------------------------------------------------|-------------------------------------------------------------------------------------|
| Technician X                                                                        | Name of Institute                                                                   |
| Technician X                                                                        | Principle investigator                                                              |
| Technician X                                                                        | Project manager                                                                     |
| 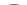 + | 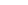 + |

| IDENTIFICATION                                                                                                                                                                                                       |                                                                                                                                                                         | Validation zone                                                                                                                      |                                      |
|----------------------------------------------------------------------------------------------------------------------------------------------------------------------------------------------------------------------|-------------------------------------------------------------------------------------------------------------------------------------------------------------------------|--------------------------------------------------------------------------------------------------------------------------------------|--------------------------------------|
| Date of questionnaire : <input type="text"/> <input type="text"/> <input type="text"/> <input type="text"/> <input type="text"/> <input type="text"/> dd/mm/yyyy                                                     |                                                                                                                                                                         | <input type="text"/> <input type="text"/> <input type="text"/> <input type="text"/> <input type="text"/> <input type="text"/> DTEQUE |                                      |
| Name of investigator : .....                                                                                                                                                                                         |                                                                                                                                                                         |                                                                                                                                      |                                      |
| Name of study supervisor : .....                                                                                                                                                                                     |                                                                                                                                                                         |                                                                                                                                      |                                      |
| <b><u>Child :</u></b>                                                                                                                                                                                                |                                                                                                                                                                         |                                                                                                                                      |                                      |
| First and last name of child :                                                                                                                                                                                       |                                                                                                                                                                         |                                                                                                                                      |                                      |
| Identification code of child :                                                                                                                                                                                       | <input type="text"/> <input type="text"/> <input type="text"/> <input type="text"/> <input type="text"/> <input type="text"/>                                           | IDENF                                                                                                                                |                                      |
| Date of birth :                                                                                                                                                                                                      | <input type="text"/> <input type="text"/> <input type="text"/> <input type="text"/> <input type="text"/> <input type="text"/>                                           | DOB                                                                                                                                  |                                      |
| Sex :                                                                                                                                                                                                                | <input type="text"/>                                                                                                                                                    | SEXE                                                                                                                                 |                                      |
| Village/town :                                                                                                                                                                                                       | <input type="text"/>                                                                                                                                                    | VILLAGE                                                                                                                              |                                      |
| Identification code of Questionnaire :                                                                                                                                                                               | <input type="text"/> | IDQUES                                                                                                                               |                                      |
| Identification code of father :                                                                                                                                                                                      | <input type="text"/> <input type="text"/> <input type="text"/> <input type="text"/>                                                                                     | IDFA                                                                                                                                 |                                      |
| Identification code of mother :                                                                                                                                                                                      | <input type="text"/> <input type="text"/> <input type="text"/> <input type="text"/>                                                                                     | IDMO                                                                                                                                 |                                      |
| Weight : <input type="text"/> <input type="text"/> <input type="text"/> <input type="text"/> (kg)                                                                                                                    | <input type="text"/> <input type="text"/> <input type="text"/> <input type="text"/> (Kg)                                                                                | WEIGHT                                                                                                                               |                                      |
| Height : <input type="text"/> <input type="text"/> <input type="text"/> <input type="text"/> <input type="text"/> (cm)                                                                                               | <input type="text"/> <input type="text"/> <input type="text"/> <input type="text"/> <input type="text"/> (cm)                                                           | HEIGHT                                                                                                                               |                                      |
| Mid Upper Arm Circumference: <input type="text"/> <input type="text"/> <input type="text"/> (cm)                                                                                                                     | <input type="text"/> <input type="text"/> (cm)                                                                                                                          | MUAC                                                                                                                                 |                                      |
| <b><u>Person questioned :</u></b>                                                                                                                                                                                    |                                                                                                                                                                         |                                                                                                                                      |                                      |
| Last name of person questioned : .....                                                                                                                                                                               |                                                                                                                                                                         | NAMEPQ                                                                                                                               |                                      |
| First name of person questioned : .....                                                                                                                                                                              |                                                                                                                                                                         | LASTNAMEPQ                                                                                                                           |                                      |
| Relationship to child : Mother <input type="checkbox"/> _1 Father <input type="checkbox"/> _2 Brother/Sister <input type="checkbox"/> _3 Grand-parents <input type="checkbox"/> _4 Other <input type="checkbox"/> _5 | <input type="text"/>                                                                                                                                                    | RELCHILD                                                                                                                             |                                      |
| If other, define : .....                                                                                                                                                                                             |                                                                                                                                                                         | OTHERREL                                                                                                                             |                                      |
| <b><u>FACTORS PREDISPOSING ATOPY</u></b>                                                                                                                                                                             |                                                                                                                                                                         |                                                                                                                                      |                                      |
| <b><u>First days of life :</u></b> Consultation of health records of child and maternity records of mother                                                                                                           |                                                                                                                                                                         |                                                                                                                                      |                                      |
| 1. How much did your child weigh at birth ?                                                                                                                                                                          |                                                                                                                                                                         |                                                                                                                                      |                                      |
| <input type="checkbox"/> _1 <1500 g                                                                                                                                                                                  | <input type="checkbox"/> _4 [2500-3500[ g                                                                                                                               | <input type="text"/>                                                                                                                 | BIRTHWEIGH                           |
| <input type="checkbox"/> _2 [1500-2000[ g                                                                                                                                                                            | <input type="checkbox"/> _5 ≥ 3500 g                                                                                                                                    |                                                                                                                                      |                                      |
| <input type="checkbox"/> _3 [2000-2500[ g                                                                                                                                                                            | <input type="checkbox"/> _9 Record not found/NSP                                                                                                                        |                                                                                                                                      |                                      |
| 2. Until what age did your child breastfeed (exclusively or mixed) ?                                                                                                                                                 |                                                                                                                                                                         |                                                                                                                                      |                                      |
| Corresponds to the age of weaning of child                                                                                                                                                                           |                                                                                                                                                                         |                                                                                                                                      |                                      |
| <input type="checkbox"/> _1 < 6 months                                                                                                                                                                               | <input type="checkbox"/> _2 6 – 12 mths                                                                                                                                 | <input type="checkbox"/> _3 12 – 24 mths                                                                                             | <input type="checkbox"/> _4 >24 mths |
| <input type="checkbox"/> _5 NSP                                                                                                                                                                                      |                                                                                                                                                                         |                                                                                                                                      |                                      |
|                                                                                                                                                                                                                      |                                                                                                                                                                         | <input type="text"/>                                                                                                                 | AGEWEAN                              |

3. Until what age did your child breastfeed **exclusively** without ever taking other aliments (fruits, vegetables, rice, meat, fish, etc.) or liquids (powdered milk, cow or goats milk, fruit juice, water, etc.) ?
- < 6 months ☐<sub>1</sub>    6 – 12 mths ☐<sub>2</sub>    12 – 24 mths ☐<sub>3</sub>    NSP ☐<sub>9</sub>

☐ AGEBREAST

**Illness and vaccination :** Consultation of health records of child

1. Has your child enfant had the following illnesses?

Malaria : ☐<sub>0</sub> No ☐<sub>1</sub> Yes ☐<sub>9</sub> NSP

☐ MALAR

Tuberculosis treated : ☐<sub>0</sub> No ☐<sub>1</sub> Yes ☐<sub>9</sub> NSP

☐ TUBTRT

Helminths (oxyures, ascaris, taenia, etc.) : ☐<sub>0</sub> No ☐<sub>1</sub> Yes ☐<sub>9</sub> NSP

☐ HEMINTH

Amoeba : ☐<sub>0</sub> No ☐<sub>1</sub> Yes ☐<sub>9</sub> NSP

☐ AMOEBA

Measles : ☐<sub>0</sub> No ☐<sub>1</sub> Yes ☐<sub>9</sub> NSP

☐ MEASLES

2. Against what illnesses is you child vaccinated?

Yellow fever : ☐<sub>0</sub> No ☐<sub>1</sub> Yes ☐<sub>9</sub> NSP

☐ VACFJ

Hepatitis B : ☐<sub>0</sub> No ☐<sub>1</sub> Yes ☐<sub>9</sub> NSP

☐ VACHEPB

Measles : ☐<sub>0</sub> No ☐<sub>1</sub> Yes ☐<sub>9</sub> NSP

☐ VACMEASLE

Mumps : ☐<sub>0</sub> No ☐<sub>1</sub> Yes ☐<sub>9</sub> NSP

☐ VACMUMPS

Rubella : ☐<sub>0</sub> No ☐<sub>1</sub> Yes ☐<sub>9</sub> NSP

☐ VACRUBEL

Tuberculosis/BCG : ☐<sub>0</sub> No ☐<sub>1</sub> Yes ☐<sub>9</sub> NSP

☐ VACTUB

Diphtheria/Tetanus/Pertussis/Poliomyelitis : ☐<sub>0</sub> No ☐<sub>1</sub> Yes ☐<sub>9</sub> NSP

☐ VACDTCP

Typhoid : ☐<sub>0</sub> No ☐<sub>1</sub> Yes ☐<sub>9</sub> NSP

☐ VACTY

Meningitis : ☐<sub>0</sub> No ☐<sub>1</sub> Yes ☐<sub>9</sub> NSP

☐ VACMENIN

Haemophilus influenzae type B (HiB) : ☐<sub>0</sub> No ☐<sub>1</sub> Yes ☐<sub>9</sub> NSP

☐ VACHIB

**Habitation :**

1. Which of these animals / insects can be found in the **rooms** where your child lives (today and/or during his first year of life) ?

Dogs in rooms today : ☐<sub>0</sub> No ☐<sub>1</sub> Yes ☐<sub>9</sub> NSP

☐ DOGTODAY

Dogs in rooms 0-1yr : ☐<sub>0</sub> No ☐<sub>1</sub> Yes ☐<sub>9</sub> NSP

☐ DOG01YR

Cats in rooms today : ☐<sub>0</sub> No ☐<sub>1</sub> Yes ☐<sub>9</sub> NSP

☐ CATTODAY

Cats in rooms 0-1yr : ☐<sub>0</sub> No ☐<sub>1</sub> Yes ☐<sub>9</sub> NSP

☐ CAT01YR

Sheep in rooms today : ☐<sub>0</sub> No ☐<sub>1</sub> Yes ☐<sub>9</sub> NSP

☐ SHEEPTODAY

Sheep in rooms 0-1yr : ☐<sub>0</sub> No ☐<sub>1</sub> Yes ☐<sub>9</sub> NSP

☐ SHEEP01YR

Goats in rooms today : ☐<sub>0</sub> No ☐<sub>1</sub> Yes ☐<sub>9</sub> NSP

☐ GOATODAY

Goats in rooms 0-1yr : ☐<sub>0</sub> No ☐<sub>1</sub> Yes ☐<sub>9</sub> NSP

☐ GOA01YR

Chicken, ducks in rooms today : ☐<sub>0</sub> No ☐<sub>1</sub> Yes ☐<sub>9</sub> NSP

☐ CHICTODAY

Chicken, ducks in rooms 0-1yr : ☐<sub>0</sub> No ☐<sub>1</sub> Yes ☐<sub>9</sub> NSP

☐ CHIC01YR

Rodents (rats, mice, etc.) in rooms today : ☐<sub>0</sub> No ☐<sub>1</sub> Yes ☐<sub>9</sub> NSP

☐ RODTODAY

Rodents (rats, mice, etc.) in rooms 0-1yr : ☐<sub>0</sub> No ☐<sub>1</sub> Yes ☐<sub>9</sub> NSP

☐ ROD01YR

Cockroaches in rooms today : ☐<sub>0</sub> No ☐<sub>1</sub> Yes ☐<sub>9</sub> NSP

☐ COCTODAY

Cockroaches in rooms 0-1yr : ☐<sub>0</sub> No ☐<sub>1</sub> Yes ☐<sub>9</sub> NSP

☐ COC01YR

Other in rooms today : ☐<sub>0</sub> No ☐<sub>1</sub> Yes ☐<sub>9</sub> NSP

☐ OTHTODAY

Other in rooms 0-1yr : ☐<sub>0</sub> No ☐<sub>1</sub> Yes ☐<sub>9</sub> NSP

☐ OTH01YR

If Others, define : .....

..... NAMEOTH

2. Which of these animals could be in **contact** with your child **at least once per week**

(today and/or during his first year of life) ?

Contact with Dogs today :

☐\_0 No ☐\_1 Yes ☐\_9 NSP

Contact with Dogs 0-1yr :

☐\_0 No ☐\_1 Yes ☐\_9 NSP

Contact with Cats today :

☐\_0 No ☐\_1 Yes ☐\_9 NSP

Contact with Cats 0-1yr :

☐\_0 No ☐\_1 Yes ☐\_9 NSP

Contact with Sheep today :

☐\_0 No ☐\_1 Yes ☐\_9 NSP

Contact with Sheep 0-1yr :

☐\_0 No ☐\_1 Yes ☐\_9 NSP

Contact with Goats today :

☐\_0 No ☐\_1 Yes ☐\_9 NSP

Contact with Goats 0-1yr :

☐\_0 No ☐\_1 Yes ☐\_9 NSP

Contact with Chicken, Ducks today :

☐\_0 No ☐\_1 Yes ☐\_9 NSP

Contact with Chicken, Ducks 0-1yr :

☐\_0 No ☐\_1 Yes ☐\_9 NSP

Contact with donkeys, horses today :

☐\_0 No ☐\_1 Yes ☐\_9 NSP

Contact with donkeys, horses 0-1yr :

☐\_0 No ☐\_1 Yes ☐\_9 NSP

Contact with Cows, zébus today :

☐\_0 No ☐\_1 Yes ☐\_9 NSP

Contact with Cows, zébus 0-1yr :

☐\_0 No ☐\_1 Yes ☐\_9 NSP

Contact with Rodents (rats, mice, etc.) today :

☐\_0 No ☐\_1 Yes ☐\_9 NSP

Contact with Rodents (rats, mice, etc.) 0-1yr :

☐\_0 No ☐\_1 Yes ☐\_9 NSP

Contact with Other today :

☐\_0 No ☐\_1 Yes ☐\_9 NSP

Contact with Other 0-1yr :

☐\_0 No ☐\_1 Yes ☐\_9 NSP

If Others, define :

3. Which of these aliments are usually stocked in the rooms where your child lives ?

Millet kept in room :

☐\_0 No ☐\_1 Yes ☐\_9 NSP

Sorghum kept in room :

☐\_0 No ☐\_1 Yes ☐\_9 NSP

Maize kept in room :

☐\_0 No ☐\_1 Yes ☐\_9 NSP

Rice kept in room :

☐\_0 No ☐\_1 Yes ☐\_9 NSP

Wheat kept in room :

☐\_0 No ☐\_1 Yes ☐\_9 NSP

Biscuits, pasta kept in room :

☐\_0 No ☐\_1 Yes ☐\_9 NSP

Manioc (root, flour) kept in room :

☐\_0 No ☐\_1 Yes ☐\_9 NSP

Cashew nut, ground nut kept in room :

☐\_0 No ☐\_1 Yes ☐\_9 NSP

Curdled milk kept in room :

☐\_0 No ☐\_1 Yes ☐\_9 NSP

Dried leaves (mint, quinquiliba, baobab, etc.) :

☐\_0 No ☐\_1 Yes ☐\_9 NSP

Other aliments kept in room :

☐\_0 No ☐\_1 Yes ☐\_9 NSP

If Others, define :

What is the type of roofing of the rooms where your child lives (today and during the first year of life) ?

Corrugated metal roof today :

☐\_0 No ☐\_1 Yes ☐\_9 NSP

Corrugated metal roof 0-1yr :

☐\_0 No ☐\_1 Yes ☐\_9 NSP

Thatched roof today:

☐\_0 No ☐\_1 Yes ☐\_9 NSP

Thatched roof 0-1yr :

☐\_0 No ☐\_1 Yes ☐\_9 NSP

Wooden roof today :

☐\_0 No ☐\_1 Yes ☐\_9 NSP

Wooden roof 0-1yr :

☐\_0 No ☐\_1 Yes ☐\_9 NSP

Cement roof today :

☐\_0 No ☐\_1 Yes ☐\_9 NSP

Cement roof 0-1yr :

☐\_0 No ☐\_1 Yes ☐\_9 NSP

Plaster roof today :

☐\_0 No ☐\_1 Yes ☐\_9 NSP

Plaster roof 0-1yr :

☐\_0 No ☐\_1 Yes ☐\_9 NSP

Other type of roof today :

☐\_0 No ☐\_1 Yes ☐\_9 NSP

CDOGTODAY

CDOG01YR

CCATODAY

CCAT01YR

CSHEEPTODAY

CSHEEP01YR

CGOATODAY

CGOA01YR

CCHICTODAY

CCHIC01YR

CHORSTODAY

CHORS01YR

CCOWTODAY

CCOW01YR

CRODTODAY

CROD01YR

COTHTODAY

COTH01YR

NAMEOTHC

MIL

SORG

MAIZ

RICE

WHEA

BISCUI

MANIOC

NUTP

MILKCURD

LEAF

OTHALIM

NAMEOTHAL

RMETTODAY

RMET01YR

RTHATDAY

RTHAT01YR

RWOOTODAY

RWOO01YR

RCEMTODAY

RCEM01YR

RPLATODAY

RPLA01YR

ROTHTODAY

Other type of roof 0-1yr : ☐ No ☐ Yes ☐ NSP

If other, define : .....

4. Which of these objects are in the room where your child sleeps (today and during the first year of life) ?

Mattress in room today : ☐ No ☐ Yes ☐ NSP

Mattress in room 0-1yr : ☐ No ☐ Yes ☐ NSP

Bednet in room today : ☐ No ☐ Yes ☐ NSP

Bednet in room 0-1yr : ☐ No ☐ Yes ☐ NSP

Wardrobe in room today : ☐ No ☐ Yes ☐ NSP

Wardrobe in room 0-1yr : ☐ No ☐ Yes ☐ NSP

Chest, trunk in room today : ☐ No ☐ Yes ☐ NSP

Chest, trunk in room 0-1yr : ☐ No ☐ Yes ☐ NSP

Table in room today : ☐ No ☐ Yes ☐ NSP

Table in room 0-1yr : ☐ No ☐ Yes ☐ NSP

Chair in room today : ☐ No ☐ Yes ☐ NSP

Chair in room 0-1yr : ☐ No ☐ Yes ☐ NSP

Carpet, rug in room today : ☐ No ☐ Yes ☐ NSP

Carpet, rug in room 0-1yr : ☐ No ☐ Yes ☐ NSP

Matting in room today : ☐ No ☐ Yes ☐ NSP

Matting in room 0-1yr : ☐ No ☐ Yes ☐ NSP

Curtains in room today : ☐ No ☐ Yes ☐ NSP

Curtains in room 0-1yr : ☐ No ☐ Yes ☐ NSP

Malagasy fire in room today : ☐ No ☐ Yes ☐ NSP

Malagasy fire in room 0-1yr : ☐ No ☐ Yes ☐ NSP

Other objects in room today : ☐ No ☐ Yes ☐ NSP

Other objects in room 0-1yr : ☐ No ☐ Yes ☐ NSP

If other, define : .....

5. On what type of bedding does your child sleep (today and during the first year of life) ?

Foam mattress today : ☐ No ☐ Yes ☐ NSP

Foam mattress 0-1yr : ☐ No ☐ Yes ☐ NSP

Plant fibre mattress (straw, etc.) today : ☐ No ☐ Yes ☐ NSP

Plant fibre mattress (straw, etc.) 0-1yr : ☐ No ☐ Yes ☐ NSP

Wool mattress today : ☐ No ☐ Yes ☐ NSP

Wool mattress 0-1yr : ☐ No ☐ Yes ☐ NSP

Feather mattress today : ☐ No ☐ Yes ☐ NSP

Feather mattress 0-1yr : ☐ No ☐ Yes ☐ NSP

Plastic matting today : ☐ No ☐ Yes ☐ NSP

Plastic matting 0-1yr : ☐ No ☐ Yes ☐ NSP

Plant fibre matting (straw, etc.) today : ☐ No ☐ Yes ☐ NSP

Plant fibre matting (straw, etc.) 0-1yr : ☐ No ☐ Yes ☐ NSP

Other type of bedding today : ☐ No ☐ Yes ☐ NSP

Other type of bedding 0-1yr : ☐ No ☐ Yes ☐ NSP

If other, define : .....

6. Does your child sleep on a pillow ? ☐ No ☐ Yes ☐ NSP

If No, go to question 8

ROTH01YR

NAMEOTHR

MATRTODAY

MATR01YR

BEDNTODAY

BEDN01YR

WARDTODAY

WARD01YR

CHESTODAY

CHES01YR

TABPTODAY

TABP01YR

CHPTODAY

CHA01YR

CARPTODAY

CARP01YR

MATPTODAY

MATP01YR

CURTTODAY

CURT01YR

FIRTTODAY

FIR01YR

OTHOBTTODAY

OTHOB01YR

NAMEOTHOB

FMATRTODAY

FMATR01YR

PLFMATRTODAY

PLFMATR01YR

WOMATRTODAY

WOMATR01YR

FEATHMTODAY

FEATHM01YR

PLMATTTODAY

PLMAT01YR

PLFMATTTODAY

PLFMAT01YR

OTHBEDTTODAY

OTHBED01YR

NOMAUTLI

PILLOW

|                                                                                                    |                                                                                                                                                   |                          |             |
|----------------------------------------------------------------------------------------------------|---------------------------------------------------------------------------------------------------------------------------------------------------|--------------------------|-------------|
| If Yes, what type of pillow is it ?                                                                |                                                                                                                                                   |                          |             |
| Foam :                                                                                             | <input type="checkbox"/> No <input type="checkbox"/> Yes <input type="checkbox"/> NSP                                                             | <input type="checkbox"/> | PILLF       |
| Synthetic fibres:                                                                                  | <input type="checkbox"/> No <input type="checkbox"/> Yes <input type="checkbox"/> NSP                                                             | <input type="checkbox"/> | PILLSYN     |
| Plant fibres (straw, etc.) :                                                                       | <input type="checkbox"/> No <input type="checkbox"/> Yes <input type="checkbox"/> NSP                                                             | <input type="checkbox"/> | PILLPLF     |
| Feather :                                                                                          | <input type="checkbox"/> No <input type="checkbox"/> Yes <input type="checkbox"/> NSP                                                             | <input type="checkbox"/> | PILLFEATH   |
| Other type of pillow :                                                                             | <input type="checkbox"/> No <input type="checkbox"/> Yes <input type="checkbox"/> NSP                                                             | <input type="checkbox"/> | OTHPILL     |
| If other, define : .....                                                                           |                                                                                                                                                   |                          | NAMEOTHPILL |
|                                                                                                    |                                                                                                                                                   |                          |             |
| 7. Do people smoke in the room where your child lives ?                                            |                                                                                                                                                   |                          |             |
| Today :                                                                                            | <input type="checkbox"/> No <input type="checkbox"/> Yes <input type="checkbox"/> NSP                                                             | <input type="checkbox"/> | SMOKTODAY   |
| From 0-1yr :                                                                                       | <input type="checkbox"/> No <input type="checkbox"/> Yes <input type="checkbox"/> NSP                                                             | <input type="checkbox"/> | SMOK01YR    |
| During the pregnancy of the mother :                                                               | <input type="checkbox"/> No <input type="checkbox"/> Yes <input type="checkbox"/> NSP                                                             | <input type="checkbox"/> | SMOKPREG    |
|                                                                                                    |                                                                                                                                                   |                          |             |
| 8. What type of heating and lighting are used in the rooms where your child lives ?                |                                                                                                                                                   |                          |             |
| Heating and lighting by charcoal :                                                                 | <input type="checkbox"/> No <input type="checkbox"/> Yes <input type="checkbox"/> NSP                                                             | <input type="checkbox"/> | CHELCHAR    |
| Heating and lighting by wood :                                                                     | <input type="checkbox"/> No <input type="checkbox"/> Yes <input type="checkbox"/> NSP                                                             | <input type="checkbox"/> | CHELWOO     |
| Lighting by candle :                                                                               | <input type="checkbox"/> No <input type="checkbox"/> Yes <input type="checkbox"/> NSP                                                             | <input type="checkbox"/> | LCAND       |
| Lighting by petrol lamp :                                                                          | <input type="checkbox"/> No <input type="checkbox"/> Yes <input type="checkbox"/> NSP                                                             | <input type="checkbox"/> | LLAMP       |
| Lighting by flash light :                                                                          | <input type="checkbox"/> No <input type="checkbox"/> Yes <input type="checkbox"/> NSP                                                             | <input type="checkbox"/> | LTORCH      |
| Lighting by solar :                                                                                | <input type="checkbox"/> No <input type="checkbox"/> Yes <input type="checkbox"/> NSP                                                             | <input type="checkbox"/> | LSOLAR      |
| Other types of heating and lighting:                                                               | <input type="checkbox"/> No <input type="checkbox"/> Yes <input type="checkbox"/> NSP                                                             | <input type="checkbox"/> | OTHHEL      |
| If other, define : .....                                                                           |                                                                                                                                                   |                          | NAMEOTHHEL  |
|                                                                                                    |                                                                                                                                                   |                          |             |
| 9. Which of the following products are used or stocked in the rooms where you child lives ?        |                                                                                                                                                   |                          |             |
| Insecticide (type Yotox, spirales, etc.) :                                                         | <input type="checkbox"/> No <input type="checkbox"/> Yes <input type="checkbox"/> NSP                                                             | <input type="checkbox"/> | INSECTIC    |
| Deodorants (aerosols) :                                                                            | <input type="checkbox"/> No <input type="checkbox"/> Yes <input type="checkbox"/> NSP                                                             | <input type="checkbox"/> | DEODORA     |
| Incense :                                                                                          | <input type="checkbox"/> No <input type="checkbox"/> Yes <input type="checkbox"/> NSP                                                             | <input type="checkbox"/> | INCENSE     |
| Detergents (type Cotel, etc.) :                                                                    | <input type="checkbox"/> No <input type="checkbox"/> Yes <input type="checkbox"/> NSP                                                             | <input type="checkbox"/> | DETERGEN    |
| Petrol, diesel :                                                                                   | <input type="checkbox"/> No <input type="checkbox"/> Yes <input type="checkbox"/> NSP                                                             | <input type="checkbox"/> | PETROL      |
| Other types of products :                                                                          | <input type="checkbox"/> No <input type="checkbox"/> Yes <input type="checkbox"/> NSP                                                             | <input type="checkbox"/> | OTHPROD     |
| If other, define : .....                                                                           |                                                                                                                                                   |                          | NAMEOTHPR   |
|                                                                                                    |                                                                                                                                                   |                          |             |
| <b>Diet :</b>                                                                                      |                                                                                                                                                   |                          |             |
|                                                                                                    |                                                                                                                                                   |                          |             |
| 1. Has your child had <b>diarrhoea without fever</b> or abdominal pains (colic)                    |                                                                                                                                                   |                          |             |
| <b>following introduction of non-maternal milk</b> in his diet (cow or goat's milk, milk powder) : |                                                                                                                                                   | <input type="checkbox"/> | DIARINT     |
| <b>after a few months</b> of consuming <b>non-maternal</b> (cow or goat's milk, milk powder) :     |                                                                                                                                                   | <input type="checkbox"/> | DIARMONTH   |
|                                                                                                    |                                                                                                                                                   |                          |             |
| 2. Currently, how many times, on average, does your child eat the following aliments ?             |                                                                                                                                                   |                          |             |
| <i>The consumption of certain aliments is seasonal.</i>                                            |                                                                                                                                                   |                          |             |
| Meat :                                                                                             | <input type="checkbox"/> Never <input type="checkbox"/> <1times/week <input type="checkbox"/> 1-2 times/week <input type="checkbox"/> ≥1times/day | <input type="checkbox"/> | CONSMEAT    |
| Fish :                                                                                             | <input type="checkbox"/> Never <input type="checkbox"/> <1times/week <input type="checkbox"/> 1-2 times/week <input type="checkbox"/> ≥1times/day | <input type="checkbox"/> | CONSFISH    |
| Egg :                                                                                              | <input type="checkbox"/> Never <input type="checkbox"/> <1times/week <input type="checkbox"/> 1-2 times/week <input type="checkbox"/> ≥1times/day | <input type="checkbox"/> | CONSEGG     |
| Milk (liquid, powder, curdled) :                                                                   | <input type="checkbox"/> Never <input type="checkbox"/> <1times/week <input type="checkbox"/> 1-2 times/week <input type="checkbox"/> ≥1times/day | <input type="checkbox"/> | CONSMILK    |
| Banana :                                                                                           | <input type="checkbox"/> Never <input type="checkbox"/> <1times/week <input type="checkbox"/> 1-2 times/week <input type="checkbox"/> ≥1times/day | <input type="checkbox"/> | CONSBANA    |
| Mango :                                                                                            | <input type="checkbox"/> Never <input type="checkbox"/> <1times/week <input type="checkbox"/> 1-2 times/week <input type="checkbox"/> ≥1times/day | <input type="checkbox"/> | CONSMANG    |
| Melon :                                                                                            | <input type="checkbox"/> Never <input type="checkbox"/> <1times/week <input type="checkbox"/> 1-2 times/week <input type="checkbox"/> ≥1times/day | <input type="checkbox"/> | CONSMELON   |

|                                                                                                                                                                                     |                                                                                                                                                                                                       |                                                                                                                                                                                  |                          |
|-------------------------------------------------------------------------------------------------------------------------------------------------------------------------------------|-------------------------------------------------------------------------------------------------------------------------------------------------------------------------------------------------------|----------------------------------------------------------------------------------------------------------------------------------------------------------------------------------|--------------------------|
| Orange, lime :                                                                                                                                                                      | <input type="checkbox"/> <sub>1</sub> Never <input type="checkbox"/> <sub>2</sub> <1times/week <input type="checkbox"/> <sub>3</sub> 1-2 times/week <input type="checkbox"/> <sub>4</sub> ≥1times/day | <input type="checkbox"/>                                                                                                                                                         | CONSORAN                 |
| Potatoes, sweet potatoes :                                                                                                                                                          | <input type="checkbox"/> <sub>1</sub> Never <input type="checkbox"/> <sub>2</sub> <1times/week <input type="checkbox"/> <sub>3</sub> 1-2 times/week <input type="checkbox"/> <sub>4</sub> ≥1times/day | <input type="checkbox"/>                                                                                                                                                         | CONSPOT                  |
| Vegetables :                                                                                                                                                                        | <input type="checkbox"/> <sub>1</sub> Never <input type="checkbox"/> <sub>2</sub> <1times/week <input type="checkbox"/> <sub>3</sub> 1-2 times/week <input type="checkbox"/> <sub>4</sub> ≥1times/day | <input type="checkbox"/>                                                                                                                                                         | CONSVEG                  |
| Millet :                                                                                                                                                                            | <input type="checkbox"/> <sub>1</sub> Never <input type="checkbox"/> <sub>2</sub> <1times/week <input type="checkbox"/> <sub>3</sub> 1-2 times/week <input type="checkbox"/> <sub>4</sub> ≥1times/day | <input type="checkbox"/>                                                                                                                                                         | CONSMIL                  |
| Sorghum :                                                                                                                                                                           | <input type="checkbox"/> <sub>1</sub> Never <input type="checkbox"/> <sub>2</sub> <1times/week <input type="checkbox"/> <sub>3</sub> 1-2 times/week <input type="checkbox"/> <sub>4</sub> ≥1times/day | <input type="checkbox"/>                                                                                                                                                         | CONSSORG                 |
| Maize :                                                                                                                                                                             | <input type="checkbox"/> <sub>1</sub> Never <input type="checkbox"/> <sub>2</sub> <1times/week <input type="checkbox"/> <sub>3</sub> 1-2 times/week <input type="checkbox"/> <sub>4</sub> ≥1times/day | <input type="checkbox"/>                                                                                                                                                         | CONSMAIS                 |
| Rice :                                                                                                                                                                              | <input type="checkbox"/> <sub>1</sub> Never <input type="checkbox"/> <sub>2</sub> <1times/week <input type="checkbox"/> <sub>3</sub> 1-2 times/week <input type="checkbox"/> <sub>4</sub> ≥1times/day | <input type="checkbox"/>                                                                                                                                                         | CONSRICE                 |
| Wheat (bread, pasta) :                                                                                                                                                              | <input type="checkbox"/> <sub>1</sub> Never <input type="checkbox"/> <sub>2</sub> <1times/week <input type="checkbox"/> <sub>3</sub> 1-2 times/week <input type="checkbox"/> <sub>4</sub> ≥1times/day | <input type="checkbox"/>                                                                                                                                                         | CONSWHEA                 |
| Nuts (Cashew, ground nut) :                                                                                                                                                         | <input type="checkbox"/> <sub>1</sub> Never <input type="checkbox"/> <sub>2</sub> <1times/week <input type="checkbox"/> <sub>3</sub> 1-2 times/week <input type="checkbox"/> <sub>4</sub> ≥1times/day | <input type="checkbox"/>                                                                                                                                                         | CONSNUT                  |
| Prawns, dried oysters :                                                                                                                                                             | <input type="checkbox"/> <sub>1</sub> Never <input type="checkbox"/> <sub>2</sub> <1times/week <input type="checkbox"/> <sub>3</sub> 1-2 times/week <input type="checkbox"/> <sub>4</sub> ≥1times/day | <input type="checkbox"/>                                                                                                                                                         | CONSPRAWN                |
| Flavouring cubes Maggi :                                                                                                                                                            | <input type="checkbox"/> <sub>1</sub> Never <input type="checkbox"/> <sub>2</sub> <1times/week <input type="checkbox"/> <sub>3</sub> 1-2 times/week <input type="checkbox"/> <sub>4</sub> ≥1times/day | <input type="checkbox"/>                                                                                                                                                         | CONSCUBE                 |
| Other :                                                                                                                                                                             | <input type="checkbox"/> <sub>1</sub> Never <input type="checkbox"/> <sub>2</sub> <1times/week <input type="checkbox"/> <sub>3</sub> 1-2 times/week <input type="checkbox"/> <sub>4</sub> ≥1times/day | <input type="checkbox"/>                                                                                                                                                         | OTHALCON                 |
| If other, define : .....                                                                                                                                                            |                                                                                                                                                                                                       | .....                                                                                                                                                                            | NAMEOTHAL                |
| <b><u>HISTORICAL SYMPTOMATOLOGY OF ALLERGIC REACTIONS</u></b>                                                                                                                       |                                                                                                                                                                                                       |                                                                                                                                                                                  |                          |
| <b><u>Asthma :</u></b>                                                                                                                                                              |                                                                                                                                                                                                       |                                                                                                                                                                                  |                          |
| 1. Has a doctor or nurse <b>already</b> said that your child has asthma ?                                                                                                           |                                                                                                                                                                                                       | <input type="checkbox"/> <sub>0</sub> No <input type="checkbox"/> <sub>1</sub> Yes <input type="checkbox"/> <sub>9</sub> NSP                                                     | <input type="checkbox"/> |
|                                                                                                                                                                                     |                                                                                                                                                                                                       |                                                                                                                                                                                  | ASTHMA                   |
| 2. Has your child already breathed noisily or had whistling in his chest whilst breathing                                                                                           |                                                                                                                                                                                                       | <input type="checkbox"/> <sub>0</sub> No <input type="checkbox"/> <sub>1</sub> Yes <input type="checkbox"/> <sub>9</sub> NSP                                                     | <input type="checkbox"/> |
| If <b>No</b> , go directly to question 6                                                                                                                                            |                                                                                                                                                                                                       |                                                                                                                                                                                  | WHISTLING                |
| 3. During his first two years of life, has your child already breathed noisily or had whistling in his chest whilst breathing ?                                                     |                                                                                                                                                                                                       | <input type="checkbox"/> <sub>0</sub> No <input type="checkbox"/> <sub>1</sub> Yes <input type="checkbox"/> <sub>9</sub> NSP                                                     | <input type="checkbox"/> |
| If <b>No</b> , go directly to question 6                                                                                                                                            |                                                                                                                                                                                                       |                                                                                                                                                                                  | WHISTL2YR                |
| If <b>Yes</b> , how many times (before 2 years of age) ?                                                                                                                            |                                                                                                                                                                                                       | <input type="checkbox"/> <sub>1</sub> 1time <input type="checkbox"/> <sub>2</sub> 2times <input type="checkbox"/> <sub>3</sub> ≥3times <input type="checkbox"/> <sub>9</sub> NSP | <input type="checkbox"/> |
|                                                                                                                                                                                     |                                                                                                                                                                                                       |                                                                                                                                                                                  | NBWHIS2YR                |
| Between the last two <b>ramadans</b> , has your child already breathed noisily or had whistling in his chest whilst breathing ?                                                     |                                                                                                                                                                                                       | <input type="checkbox"/> <sub>0</sub> No <input type="checkbox"/> <sub>1</sub> Yes <input type="checkbox"/> <sub>9</sub> NSP                                                     | <input type="checkbox"/> |
|                                                                                                                                                                                     |                                                                                                                                                                                                       |                                                                                                                                                                                  | WHISTL2RA                |
| If <b>No</b> , go directly to question 5                                                                                                                                            |                                                                                                                                                                                                       |                                                                                                                                                                                  |                          |
| If <b>Yes</b> , at which moment of the year ?                                                                                                                                       |                                                                                                                                                                                                       |                                                                                                                                                                                  |                          |
| Rainy season :                                                                                                                                                                      |                                                                                                                                                                                                       | <input type="checkbox"/> <sub>0</sub> No <input type="checkbox"/> <sub>1</sub> Yes <input type="checkbox"/> <sub>9</sub> NSP                                                     | <input type="checkbox"/> |
|                                                                                                                                                                                     |                                                                                                                                                                                                       |                                                                                                                                                                                  | WHISTLRS                 |
| Dry season :                                                                                                                                                                        |                                                                                                                                                                                                       | <input type="checkbox"/> <sub>0</sub> No <input type="checkbox"/> <sub>1</sub> Yes <input type="checkbox"/> <sub>9</sub> NSP                                                     | <input type="checkbox"/> |
|                                                                                                                                                                                     |                                                                                                                                                                                                       |                                                                                                                                                                                  | WHISTLDS                 |
| Harvest time :                                                                                                                                                                      |                                                                                                                                                                                                       | <input type="checkbox"/> <sub>0</sub> No <input type="checkbox"/> <sub>1</sub> Yes <input type="checkbox"/> <sub>9</sub> NSP                                                     | <input type="checkbox"/> |
|                                                                                                                                                                                     |                                                                                                                                                                                                       |                                                                                                                                                                                  | WHISTLHT                 |
| Has the noisy breathing of your child been such that it has prevented him from talking normally?                                                                                    |                                                                                                                                                                                                       | <input type="checkbox"/> <sub>0</sub> No <input type="checkbox"/> <sub>1</sub> Yes <input type="checkbox"/> <sub>9</sub> NSP                                                     | <input type="checkbox"/> |
|                                                                                                                                                                                     |                                                                                                                                                                                                       |                                                                                                                                                                                  | PREVTALK                 |
| Has your child already had a rasping cough at night that prevents him from sleeping normally ?                                                                                      |                                                                                                                                                                                                       | <input type="checkbox"/> <sub>0</sub> No <input type="checkbox"/> <sub>1</sub> Yes <input type="checkbox"/> <sub>9</sub> NSP                                                     | <input type="checkbox"/> |
|                                                                                                                                                                                     |                                                                                                                                                                                                       |                                                                                                                                                                                  | TOUSECHE                 |
| <b><u>Rhinitis and allergic conjunctivitis:</u></b>                                                                                                                                 |                                                                                                                                                                                                       |                                                                                                                                                                                  |                          |
| 1. Has your child <b>already had</b> problems of a runny nose, or a sensation of a blocked nose, or an itchy nose, or sneezing, or loss of the sense of smell for more than a week, |                                                                                                                                                                                                       |                                                                                                                                                                                  |                          |

1  
2  
3  
4  
5  
6  
7  
8  
9  
10  
11  
12  
13  
14  
15  
16  
17  
18  
19  
20  
21  
22  
23  
24  
25  
26  
27  
28  
29  
30  
31  
32  
33  
34  
35  
36  
37  
38  
39  
40  
41  
42  
43  
44  
45  
46  
47  
48  
49  
50  
51  
52  
53  
54  
55  
56  
57  
58  
59  
60

|                                                                                                                                                                                                                                                                            |                                                                                       |                          |            |
|----------------------------------------------------------------------------------------------------------------------------------------------------------------------------------------------------------------------------------------------------------------------------|---------------------------------------------------------------------------------------|--------------------------|------------|
| irrespective of the frequency of these episodes?                                                                                                                                                                                                                           | <input type="checkbox"/> No <input type="checkbox"/> Yes <input type="checkbox"/> NSP | <input type="checkbox"/> | RHIN1WEEK  |
| 2. Has your child <b>already had</b> problems of a runny nose, <b>or</b> a sensation of a blocked nose, <b>or</b> an itchy nose, <b>or</b> sneezing, or loss of the sense of smell <b>more than 5 times in one year</b> , irrespective of the frequency of these episodes? | <input type="checkbox"/> No <input type="checkbox"/> Yes <input type="checkbox"/> NSP | <input type="checkbox"/> | RHIN5FAN   |
| Between the <b>last two ramadans</b> , has your child <b>already had</b> problems of a runny nose, <b>or</b> a sensation of a blocked nose, <b>or</b> an itchy nose, <b>or</b> sneezing, or loss of the sense of smell ?                                                   | <input type="checkbox"/> No <input type="checkbox"/> Yes <input type="checkbox"/> NSP | <input type="checkbox"/> | RHIN2RAM   |
| If <b>No</b> , go to question 4                                                                                                                                                                                                                                            |                                                                                       |                          |            |
| If <b>Yes</b> , at what moment of the year ?                                                                                                                                                                                                                               |                                                                                       |                          |            |
| Rainy season :                                                                                                                                                                                                                                                             | <input type="checkbox"/> No <input type="checkbox"/> Yes <input type="checkbox"/> NSP | <input type="checkbox"/> | RHINRS     |
| Dry season :                                                                                                                                                                                                                                                               | <input type="checkbox"/> No <input type="checkbox"/> Yes <input type="checkbox"/> NSP | <input type="checkbox"/> | RHINDS     |
| Harvest time :                                                                                                                                                                                                                                                             | <input type="checkbox"/> No <input type="checkbox"/> Yes <input type="checkbox"/> NSP | <input type="checkbox"/> | RHINHT     |
| 3. Has your child <b>already had</b> watery eyes, <b>or</b> itchy eyes, <b>or</b> an allergic limbo-conjunctivitis?                                                                                                                                                        | <input type="checkbox"/> No <input type="checkbox"/> Yes <input type="checkbox"/> NSP | <input type="checkbox"/> | CONJALER   |
| If <b>No</b> , go directly to question 1 in the section <b>Eczema</b>                                                                                                                                                                                                      |                                                                                       |                          |            |
| Has your child had, between the <b>last two ramadans</b> , watery eyes, <b>or</b> itchy eyes, <b>or</b> an allergic limbo-conjunctivitis?                                                                                                                                  | <input type="checkbox"/> No <input type="checkbox"/> Yes <input type="checkbox"/> NSP | <input type="checkbox"/> | CONJ2RAM   |
| If <b>No</b> , go directly to question 5                                                                                                                                                                                                                                   |                                                                                       |                          |            |
| If <b>Yes</b> , at what moment of the year ?                                                                                                                                                                                                                               |                                                                                       |                          |            |
| Rainy season :                                                                                                                                                                                                                                                             | <input type="checkbox"/> No <input type="checkbox"/> Yes <input type="checkbox"/> NSP | <input type="checkbox"/> | CONJRS     |
| Dry season :                                                                                                                                                                                                                                                               | <input type="checkbox"/> No <input type="checkbox"/> Yes <input type="checkbox"/> NSP | <input type="checkbox"/> | CONJDS     |
| Harvest time :                                                                                                                                                                                                                                                             | <input type="checkbox"/> No <input type="checkbox"/> Yes <input type="checkbox"/> NSP | <input type="checkbox"/> | CONJHT     |
| <b><u>Eczéma :</u></b>                                                                                                                                                                                                                                                     |                                                                                       |                          |            |
| Has your child <b>already had</b> skin problems with dry patches or seeping cracked patches and itching ?                                                                                                                                                                  | <input type="checkbox"/> No <input type="checkbox"/> Yes <input type="checkbox"/> NSP | <input type="checkbox"/> | ECZEMA     |
| If <b>No</b> , the questionnaire has finished.                                                                                                                                                                                                                             |                                                                                       |                          |            |
| Between the <b>last two ramadans</b> , has your child had skin problems with dry patches or seeping cracked patches and itching ??                                                                                                                                         | <input type="checkbox"/> No <input type="checkbox"/> Yes <input type="checkbox"/> NSP | <input type="checkbox"/> | ECZE2RAM   |
| If <b>No</b> , go directly to question 3                                                                                                                                                                                                                                   |                                                                                       |                          |            |
| If <b>Yes</b> , at what moment of the year ?                                                                                                                                                                                                                               |                                                                                       |                          |            |
| Rainy season :                                                                                                                                                                                                                                                             | <input type="checkbox"/> No <input type="checkbox"/> Yes <input type="checkbox"/> NSP | <input type="checkbox"/> | ECZEMARS   |
| Dry season :                                                                                                                                                                                                                                                               | <input type="checkbox"/> No <input type="checkbox"/> Yes <input type="checkbox"/> NSP | <input type="checkbox"/> | ECZEMADS   |
| Harvest time :                                                                                                                                                                                                                                                             | <input type="checkbox"/> No <input type="checkbox"/> Yes <input type="checkbox"/> NSP | <input type="checkbox"/> | ECZEMAHT   |
| 1. Have these skin problems affected different parts of the body of your child ?                                                                                                                                                                                           |                                                                                       |                          |            |
| Scalp :                                                                                                                                                                                                                                                                    | <input type="checkbox"/> No <input type="checkbox"/> Yes <input type="checkbox"/> NSP | <input type="checkbox"/> | ECZESCALP  |
| Face :                                                                                                                                                                                                                                                                     | <input type="checkbox"/> No <input type="checkbox"/> Yes <input type="checkbox"/> NSP | <input type="checkbox"/> | ECZEFAC    |
| Around the eyes and ears :                                                                                                                                                                                                                                                 | <input type="checkbox"/> No <input type="checkbox"/> Yes <input type="checkbox"/> NSP | <input type="checkbox"/> |            |
| Armpits :                                                                                                                                                                                                                                                                  | <input type="checkbox"/> No <input type="checkbox"/> Yes <input type="checkbox"/> NSP | <input type="checkbox"/> | ECZEEYEEAR |

Elbow : ☐ No ☐ Yes ☐ NSP

Hands : ☐ No ☐ Yes ☐ NSP

Under the buttocks: ☐ No ☐ Yes ☐ NSP

Groin : ☐ No ☐ Yes ☐ NSP

Behind the knee : ☐ No ☐ Yes ☐ NSP

Feet : ☐ No ☐ Yes ☐ NSP

Other part of body : ☐ No ☐ Yes ☐ NSP

What age did your child have when these skin problems of dry patches, weeping cracked patches or itching appear for the **first time**?

☐ <sub>1</sub> < 2yr ☐ <sub>2</sub> 2 - 4 yr ☐ <sub>3</sub> ≥ 5yr

Have your child's skin problems ever been sufficiently important to prevent him from sleeping correctly or waking him up during the night ?

☐ No ☐ Yes ☐ NSP

ECZEARMFIT  
ECZEELBOW  
ECZEHAND  
ECZEBUTT  
ECZEGROIN  
ECZEKNEE  
ECZEFEET  
ECZEOTH

AGECZEMA

IRRECZEM

**Comments :** Note with reference to which questions these comments apply

STROBE Statement—checklist of items included in reports of observational studies

|                              | Item No | Recommendation                                                                                                                                                                                |
|------------------------------|---------|-----------------------------------------------------------------------------------------------------------------------------------------------------------------------------------------------|
| <b>Title and abstract</b>    | 1       | (a) Indicate the study’s design with a commonly used term in the title or the abstract<br>(b) Provide in the abstract an informative and balanced summary of what was done and what was found |
| <b>Introduction</b>          |         |                                                                                                                                                                                               |
| Background/rationale         | 2       | Explain the scientific background and rationale for the investigation being reported                                                                                                          |
| Objectives                   | 3       | State specific objectives, including any prespecified hypotheses                                                                                                                              |
| <b>Methods</b>               |         |                                                                                                                                                                                               |
| Study design                 | 4       | Present key elements of study design early in the paper                                                                                                                                       |
| Setting                      | 5       | Describe the setting, locations, and relevant dates, including periods of recruitment, exposure, follow-up, and data collection                                                               |
| Participants                 | 6       | (a) <i>Cohort study</i> —Give the eligibility criteria, and the sources and methods of selection of participants. Describe methods of follow-up                                               |
|                              |         | <i>Cross-sectional study</i> —Give the eligibility criteria, and the sources and methods of selection of participants                                                                         |
|                              |         | (b) <i>Cohort study</i> —For matched studies, give matching criteria and number of exposed and unexposed                                                                                      |
|                              |         |                                                                                                                                                                                               |
| Variables                    | 7       | Clearly define all outcomes, exposures, predictors, potential confounders, and effect modifiers. Give diagnostic criteria, if applicable                                                      |
| Data sources/<br>measurement | 8*      | For each variable of interest, give sources of data and details of methods of assessment (measurement). Describe comparability of assessment methods if there is more than one group          |
| Bias                         | 9       | Describe any efforts to address potential sources of bias                                                                                                                                     |
| Study size                   | 10      | Explain how the study size was arrived at                                                                                                                                                     |
| Quantitative variables       | 11      | Explain how quantitative variables were handled in the analyses. If applicable, describe which groupings were chosen and why                                                                  |
| Statistical methods          | 12      | (a) Describe all statistical methods, including those used to control for confounding                                                                                                         |
|                              |         | (b) Describe any methods used to examine subgroups and interactions                                                                                                                           |
|                              |         | (c) Explain how missing data were addressed                                                                                                                                                   |
|                              |         | (d) <i>Cohort study</i> —If applicable, explain how loss to follow-up was addressed<br><i>Case-control study</i> —If applicable, explain how matching of cases and controls was addressed     |
|                              |         | <i>Cross-sectional study</i> —If applicable, describe analytical methods taking account of sampling strategy                                                                                  |
|                              |         | (e) Describe any sensitivity analyses                                                                                                                                                         |

Continued on next page

**Results**

|                  |     |                                                                                                                                                                                                                                                                                                                                                                                                               |
|------------------|-----|---------------------------------------------------------------------------------------------------------------------------------------------------------------------------------------------------------------------------------------------------------------------------------------------------------------------------------------------------------------------------------------------------------------|
| Participants     | 13* | (a) Report numbers of individuals at each stage of study—eg numbers potentially eligible, examined for eligibility, confirmed eligible, included in the study, completing follow-up, and analysed<br>(b) Give reasons for non-participation at each stage<br>(c) Consider use of a flow diagram                                                                                                               |
| Descriptive data | 14* | (a) Give characteristics of study participants (eg demographic, clinical, social) and information on exposures and potential confounders<br>(b) Indicate number of participants with missing data for each variable of interest<br>(c) <i>Cohort study</i> —Summarise follow-up time (eg, average and total amount)                                                                                           |
| Outcome data     | 15* | <i>Cohort study</i> —Report numbers of outcome events or summary measures over time<br><i>Case-control study</i> —Report numbers in each exposure category, or summary measures of exposure<br><i>Cross-sectional study</i> —Report numbers of outcome events or summary measures                                                                                                                             |
| Main results     | 16  | (a) Give unadjusted estimates and, if applicable, confounder-adjusted estimates and their precision (eg, 95% confidence interval). Make clear which confounders were adjusted for and why they were included<br>(b) Report category boundaries when continuous variables were categorized<br>(c) If relevant, consider translating estimates of relative risk into absolute risk for a meaningful time period |
| Other analyses   | 17  | Report other analyses done—eg analyses of subgroups and interactions, and sensitivity analyses                                                                                                                                                                                                                                                                                                                |

**Discussion**

|                  |    |                                                                                                                                                                            |
|------------------|----|----------------------------------------------------------------------------------------------------------------------------------------------------------------------------|
| Key results      | 18 | Summarise key results with reference to study objectives                                                                                                                   |
| Limitations      | 19 | Discuss limitations of the study, taking into account sources of potential bias or imprecision. Discuss both direction and magnitude of any potential bias                 |
| Interpretation   | 20 | Give a cautious overall interpretation of results considering objectives, limitations, multiplicity of analyses, results from similar studies, and other relevant evidence |
| Generalisability | 21 | Discuss the generalisability (external validity) of the study results                                                                                                      |

**Other information**

|         |    |                                                                                                                                                               |
|---------|----|---------------------------------------------------------------------------------------------------------------------------------------------------------------|
| Funding | 22 | Give the source of funding and the role of the funders for the present study and, if applicable, for the original study on which the present article is based |
|---------|----|---------------------------------------------------------------------------------------------------------------------------------------------------------------|

\*Give information separately for cases and controls in case-control studies and, if applicable, for exposed and unexposed groups in cohort and cross-sectional studies.

**Note:** An Explanation and Elaboration article discusses each checklist item and gives methodological background and published examples of transparent reporting. The STROBE checklist is best used in conjunction with this article (freely available on the Web sites of PLoS Medicine at <http://www.plosmedicine.org/>, Annals of Internal Medicine at <http://www.annals.org/>, and Epidemiology at <http://www.epidem.com/>). Information on the STROBE Initiative is available at [www.strobe-statement.org](http://www.strobe-statement.org).



**Asthma and atopic dermatitis are associated with increased risk of clinical Plasmodium falciparum malaria**

|                                 |                                                                                                                                                                                                                                                                                                                                                                                                                                                                                                                                                       |
|---------------------------------|-------------------------------------------------------------------------------------------------------------------------------------------------------------------------------------------------------------------------------------------------------------------------------------------------------------------------------------------------------------------------------------------------------------------------------------------------------------------------------------------------------------------------------------------------------|
| Journal:                        | <i>BMJ Open</i>                                                                                                                                                                                                                                                                                                                                                                                                                                                                                                                                       |
| Manuscript ID:                  | bmjopen-2013-002835.R2                                                                                                                                                                                                                                                                                                                                                                                                                                                                                                                                |
| Article Type:                   | Research                                                                                                                                                                                                                                                                                                                                                                                                                                                                                                                                              |
| Date Submitted by the Author:   | 13-Jun-2013                                                                                                                                                                                                                                                                                                                                                                                                                                                                                                                                           |
| Complete List of Authors:       | Herrant, Magali; Institut Pasteur, Loucoubar, Cheikh; Institut Pasteur, Bassene, Hubert; Institut de Recherche pour le Développement, Goncalves, Bronner; Institut Pasteur, Boufkhed, Sabah; Institut Pasteur, Diene Sarr, Fatoumata; Institut Pasteur de Dakar, Fontanet, Arnaud; Institut Pasteur, Tall, Adama; Institut Pasteur de Dakar, Baril, Laurence; Institut Pasteur de Dakar, Mercereau-Puijalon, Odile; Institut Pasteur, Mecheri, Salaheddine; Institut Pasteur, Sakuntabhai, Anavaj; Institut Pasteur, Paul, Richard; Institut Pasteur, |
| <b>Primary Subject Heading</b>: | Epidemiology                                                                                                                                                                                                                                                                                                                                                                                                                                                                                                                                          |
| Secondary Subject Heading:      | Epidemiology, Immunology (including allergy), Infectious diseases, Dermatology                                                                                                                                                                                                                                                                                                                                                                                                                                                                        |
| Keywords:                       | Allergy < THORACIC MEDICINE, Asthma < THORACIC MEDICINE, Epidemiology < INFECTIOUS DISEASES                                                                                                                                                                                                                                                                                                                                                                                                                                                           |
|                                 |                                                                                                                                                                                                                                                                                                                                                                                                                                                                                                                                                       |

SCHOLARONE™  
Manuscripts

**Asthma and atopic dermatitis are associated with increased risk of clinical *Plasmodium falciparum* malaria**

Magali Herrant<sup>1,2</sup> *scientist*, Cheikh Loucoubar<sup>1,2,3,4</sup> *scientist*, Hubert Bassène<sup>5</sup> *scientist*, Bronner Gonçalves<sup>2</sup> MD, Sabah Boufkhed<sup>2</sup> *scientist*, Fatoumata Diene Sarr<sup>2</sup> MD, Arnaud Fontanet<sup>6,7</sup> MD, Adama Tall<sup>2</sup> *scientist*, Laurence Baril<sup>2</sup> MD, Odile Mercereau-Puijalon<sup>8</sup> *scientist*, Salaheddine Mécheri<sup>9</sup> *scientist*, Anavaj Sakuntabhai<sup>1,10</sup> *scientist*, Richard Paul<sup>1</sup> *scientist*

- <sup>1</sup> Institut Pasteur, Unité de la Génétique Fonctionnelle des Maladies Infectieuses, CNRS URA3012, 28 rue du Docteur Roux, F-75724, Paris cedex 15, France.
- <sup>2</sup> Institut Pasteur de Dakar, Unité d'Epidémiologie des Maladies Infectieuses, Dakar, Senegal.
- <sup>3</sup> INSERM, U946, Genetic Variation and Human Diseases Unit, F-75010, Paris, France.
- <sup>4</sup> Université Paris Diderot, Sorbonne Paris Cité, Institut Universitaire d'Hématologie, F-75010, Paris, France.
- <sup>5</sup> Institut de Recherche pour le Développement (IRD), Unité de Recherche sur les Maladies Infectieuses et Tropicales Emergentes, URMITE CNRS-IRD 198 UMR 6236, Dakar, Sénégal
- <sup>6</sup> Institut Pasteur, Unité d'Epidémiologie des Maladies Emergentes, 25 rue du Docteur Roux, F-75724, Paris cedex 15, France.
- <sup>7</sup> Conservatoire National des Arts et Métiers, 292 rue Saint Martin, Paris 75003, France
- <sup>8</sup> Institut Pasteur, Unité d'Immunologie Moléculaire des Parasites, CNRS URA2581, Paris, France.
- <sup>9</sup> Institut Pasteur, Unité de Biologie des Interactions Hôte Parasite, 25 rue du Docteur Roux, F-75724, Paris cedex 15, France.
- <sup>10</sup> Complex Systems group, Faculty of Science, Mahidol University, Bangkok, Thailand.

**Correspondance to:** Richard Paul, Institut Pasteur, Unité de la Génétique Fonctionnelle des Maladies Infectieuses, 28 rue du Docteur Roux, 75724 Paris cedex 15, France.  
richard.paul@pasteur.fr

## Article summary

### Article focus

- Genetic studies suggest a link between susceptibility to allergy and malaria in Africa
- We hypothesize that atopy increases susceptibility to malaria

### Key messages

- Results demonstrate an association between asthma, atopic dermatitis and susceptibility to clinical *P. falciparum* episodes.
- Genetic pre-disposition to asthma or atopic dermatitis impairs the acquisition of clinical immunity to malaria.
- Administration of anti-histamines to atopic children will likely reduce the burden of clinical malaria in these children, increase the efficacy of first-line treatment anti-malarials and alleviate the non-infectious consequences of atopy.

### Strengths and limitations

The major strength of this study is the complete knowledge of the number of clinical *P. falciparum* malaria episodes each individual has had since birth and the exposure level per trimester over the 15 years covering the birth cohort. No other study has such detailed information for such a length of time. The major weakness of the study is the relatively small sample size, which would have reduced power to detect an association.

1  
2  
3  
4  
5  
6  
7  
8  
9  
10  
11  
12  
13  
14  
15  
16  
17  
18  
19  
20  
21  
22  
23  
24  
25  
26  
27  
28  
29  
30  
31  
32  
33  
34  
35  
36  
37  
38  
39  
40  
41  
42  
43  
44  
45  
46  
47  
48  
49  
50  
51  
52  
53  
54  
55  
56  
57  
58  
59  
60

**Abstract**

**Objectives:** To assess the impact of atopy and allergy on the risk of clinical malaria.

**Design:** A clinical and immunological allergy cross-sectional survey in a birth cohort of 175 children from 1 month to 14 years of age followed for up to 15 years in a longitudinal open cohort study of malaria in Senegal. Malaria incidence data were available for 143 of these children (aged 4 months to 14 years of age) for up to 15 years. Mixed model regression analysis was used to determine the impact of allergy status on malaria incidence, adjusting for age, gender, sickle cell trait and force of infection.

**Main outcome measures:** Asthma, allergic rhinoconjunctivitis and atopic dermatitis status, the number of clinical *Plasmodium falciparum* malaria episodes since birth and associated parasite density.

**Results:** Twelve percent of the children were classified as asthmatic and ten percent as having atopic dermatitis. These groups had respectively a two-fold (OR 2.12 95% confidence intervals 1.46 to 3.08;  $P= 8 \times 10^{-5}$ ) and three-fold (OR 3.15, 1.56 to 6.33;  $P= 1.3 \times 10^{-3}$ ) increase in the risk of clinical *P. falciparum* malaria once older than the age of peak incidence of clinical malaria (3 to 4 years of age). They also presented with higher *P. falciparum* parasite densities (Asthma: mean 105.3 parasites/ $\mu$ L  $\pm$ SE 41.0 vs. 51.3  $\pm$ 9.7;  $P= 6.2 \times 10^{-3}$ ; Atopic dermatitis: 135.4  $\pm$ 70.7 vs. 52.3  $\pm$ 11.0;  $P=0.014$ ). There was no effect of allergy on the number of non-malaria clinical presentations. Individuals with allergic rhinoconjunctivitis did not have an increased risk of clinical malaria nor any difference in parasite densities.

**Conclusion:** These results demonstrate that asthma and atopic dermatitis delay the development of clinical immunity to *P. falciparum*. Despite the encouraging decrease in malaria incidence rates in Africa, a significant concern is the extent to which the increase in allergy will exacerbate the burden of malaria. Given the demonstrated anti-parasitic effect of anti-histamines, administration to atopic children will likely reduce the burden of clinical malaria in these children, increase the efficacy of first-line treatment anti-malarials and alleviate the non-infectious consequences of atopy.

## Introduction

The World Allergy Organization estimates that 40% of the world's population is concerned by allergic diseases.<sup>1</sup> In developing countries where *Plasmodium falciparum* malaria is endemic, prevalence of allergy is significantly lower, but is on the increase.<sup>2</sup> T helper type 2 (Th2) cells, their related cytokines, IgE, eosinophils and mast cells play a major role in allergic inflammation. Orientation of the immune response towards a Th1 profile is crucial for immunity to intracellular pathogens,<sup>3</sup> whereas orientation towards a Th2 profile drives immunity to extracellular pathogens and antigens resulting in class switching giving rise to IgE-producing B cells.<sup>4</sup> A role of the Th1/Th2 balance in the development of clinical malaria following infection by *P. falciparum* has been suggested by numerous studies.<sup>5-7</sup> Whilst it is recognised that acquired anti-parasite immunity is IgG dependent,<sup>8</sup> parasite-specific IgE also impact upon the clinical outcome of infection. For example, higher IgE but not IgG levels have been observed in patients with cerebral malaria than those with uncomplicated *P. falciparum* infection.<sup>9</sup> The role of IgE, however, remains unclear.<sup>10</sup>

The interplay between infectious agents and allergy is ambiguous. On the one hand, for example, severe respiratory syncytial virus infection in infants increased the risk of allergic rhinoconjunctivitis and allergic asthma.<sup>11,12</sup> On the other hand, measles,<sup>13</sup> hepatitis A<sup>14</sup> and tuberculosis<sup>15</sup> seemingly reduce atopy. Although, an atopic condition can increase incidence of disease, such as the case for the skin commensal *Staphylococcus aureus* in patients with atopic dermatitis,<sup>16</sup> an atopic tendency *per se* does not generally lead to increased illness from infectious agents.

Genome wide studies have identified chromosomal regions linked to clinical malaria, all of which overlap with those previously identified to be involved in atopic dermatitis, asthma, atopy and IgE levels,<sup>17-19</sup> suggesting that common mechanisms may be involved in both pathologies.<sup>20</sup> Chromosomal region 5q31 that has been repeatedly shown to be associated with control of parasite density and contains a cluster of cytokines, among which IL12B has been previously associated with psoriasis.<sup>21</sup> The other regions, 13q13-q22, 5p15-p13 and 12q21-q23, contain genes involved in innate immunity, notably the interleukin 7 receptor, and several involved in tumour necrosis factor synthesis [C1q and tumour necrosis factor related protein 3 (C1QTNF3)] and a gene involved in the complement system (C9).<sup>20</sup>

Several additional lines of evidence support the concept that susceptibility to malaria and atopy may be related to similar immunological defects. In Ethiopia, a history of malaria was associated with atopy.<sup>22</sup> A mouse model for human atopic disease was found to be very susceptible to murine malaria and a major locus for atopic disease mapped close to the region controlling parasite density.<sup>23</sup> This region contains several candidate genes that have effects on T-cell function.<sup>23</sup>

Moreover, a direct effect of histamine in the malaria pathogenesis has been found using genetic and pharmacological approaches<sup>24</sup> and increased levels of histamine are associated with the severity of disease in humans infected with *P. falciparum* and in animal malaria models.<sup>25,26</sup>

To test the hypothesis that allergy impacts upon clinical *P. falciparum* malaria, we performed a clinical allergy cross-sectional study in the family-based longitudinal cohort from Senegal previously used for the genome linkage study<sup>20</sup> and analysed the impact of asthma, atopic dermatitis, allergic rhinoconjunctivitis on the incidence of clinical *P. falciparum* episodes and the maximum parasite density during each episode.

**Methods**

**Population and outcome data**

The malaria research program conducted in Dielmo village in Senegal has been ongoing since 1990 as described elsewhere.<sup>27</sup> In brief, between 1990 and 2008, a longitudinal study involving the inhabitants of the village of Dielmo, Senegal, was carried out to identify all episodes of fever. The study design included daily medical surveillance with systematic blood testing of individuals with fever and examination of 200 oil-immersion fields on a thick blood film for malaria parasites (about 0.5 µL of blood). Each individual was given a unique identification code and details of family ties, occupation, and precise place of residence were recorded on detailed maps of each household with the location of each bedroom. All households were visited daily, absenteeism recorded, and the presence of fever or other symptoms assessed. We systematically recorded body temperature at home three times a week (every second day) in children younger than 5 years, and in older children and adults in cases of suspected fever or fever-related symptoms. In cases of fever or other symptoms,

blood testing was done at the dispensary by finger prick, and we provided detailed medical examination and specific treatment. Parasitologically confirmed clinical malaria episodes were treated according to national guidelines. From 1990 to 2008, four different drug regimens were implemented: Quinine from 1990 to 1994, Chloroquine from 1995 to 2003, Fansidar (sulfadoxine-pyrimethamine) from 2004 to mid-2006 and Artemisinin-based combination therapy (ACT; Amodiaquine- sulfadoxine-pyrimethamine) from mid-2006 to 2008.

Parasite positivity was established as follows. Thick blood films were prepared and stained by 3% Giemsa stain. Blood films were examined under an oil immersion objective at x1000 magnification by the trained laboratory technicians and 200 thick film fields were examined to count the number of asexual and gametocyte parasite stages. Asexual parasite densities (per  $\mu\text{L}$ ) were calculated by establishing the ratio of parasites to white blood cells and then multiplying the parasite count by 8,000, the average white blood cell count per  $\mu\text{L}$  of blood.

Malaria transmission in Dielmo is intense and perennial. We conducted a cross-sectional survey to estimate the prevalence of symptoms related to allergic diseases among 175 children aged from 1 month to 14 years old who were born during the malaria research program.

Both the longitudinal and cross-sectional surveys were approved by the Ministry of Health of Senegal. Informed consent of the volunteers is renewed every year. More specifically for the cross-sectional survey, after informing about the procedures and the purpose of the study, written informed consent was obtained from parents or guardians of children either by signature or by thumbprint on a voluntary consent form written in both French and Wolof, the main local language. Consent was obtained in the presence of the school director, an independent witness.

The family structure (pedigree) was available after a demographic census performed for every volunteer at his adhesion in the project. A verbal interview of mothers or key representatives of the household was used to obtain information on genetic relationships between studied individuals, their children, their parents, and to identify genetic links among the population. The total pedigree comprised 828 individuals, including absent or dead relatives, composed of ten independent families that can be sub-divided into 206 nuclear families (father – mother couples with at least one child) with an average of 3.6

children each. Genetically related nuclear families occur because of multiple marriages and marriages among related individuals. Previous typing with microsatellites has enabled the construction of a pedigree based on Identity-by-Descent using MERLIN.<sup>20,28</sup> The mean coefficient of inbreeding is 0.0008. Newborns since this original genetic analysis were added to the family of the parents in question. The 143 children, with both allergy and malaria data, belonged to 61 nuclear families and comprised 30 singletons, 102 siblings and 11 half-sibs (yielding 55 half-sib pairs). The mean genetic relatedness (by pedigree) of the 143 children is 0.0114 (range: 0.0013 to 0.022).

*P. falciparum clinical episodes*

*P. falciparum* malaria clinical episode phenotypes analysed were: (i) clinical *P. falciparum* infections treated with anti-malarial therapy and (ii) the highest parasite density during the *P. falciparum* clinical episode. A clinical *P. falciparum* episode was defined as a clinical presentation with fever (axillary temperature  $\geq 37.5^{\circ}\text{C}$ ) and/or other clinical signs suggestive of malaria associated with a thick blood smear positive for *P. falciparum* and that was treated with anti-malarial therapy. Repeated clinical malaria presentations within 15 consecutive days were not considered to be independent and were excluded from the analyses, unless there was a negative thick blood smear between two clinical presentations. We also excluded observations in any trimester for which the individual was not present for at least one third of the time.

We calculated the quarterly incidence rate of clinical *P. falciparum* episodes in children below the age of 15 years as the ratio of the total number of clinical *P. falciparum* episodes during the trimester divided by the total number of person-trimesters surveyed. Incidence rate is expressed as cases per 100 person-trimesters (see Supplementary Figure S1). This rate was used in the analysis to approximate the force of infection (exposure level) within the targeted population at the time of a given clinical *P. falciparum* episode.

The total number of clinical presentations per trimester that were not attributable to *P. falciparum* was tabulated. Repeated non-malaria presentations within seven consecutive days were not considered to be independent and were excluded.

*Allergic diseases and atopic status*

The International Study of Asthma and Allergies in Childhood (ISAAC) diagnostic criteria have been shown to be reproducible, adequate and able to discriminate children with allergic diseases in different areas of the world.<sup>2</sup> The standardized ISAAC questionnaire originally written in English was translated into French in compliance with ISAAC guidelines<sup>29</sup>, adapting it to the usual local customs following advice from local clinicians and paediatric allergologists (Acknowledgements and Technical Appendix). The adequacy and reliability of the translated questionnaire had been previously confirmed by a pilot study on 30 randomly selected children in the same community. The questionnaire was completed by specially trained health workers during an oral interview conducted in Wolof with children and their mothers or guardians.

To assess the prevalence of allergic diseases in children, we used the positive and negative predictive values of the ISAAC questionnaire diagnosis criteria developed for subtropical countries.<sup>30</sup> Each question was scored according to the medical diagnosis of paediatricians and paediatric allergologists. Positive or negative answers were thus graded on the basis of symptom sensitivity, specificity, frequency, location or early onset. For each allergic disease, three categories of symptom severity, *severe*, *moderate*, and *none*, were defined as follows:

*Asthma – severe* symptoms if the child had “wheezing or whistling in the chest before the age of two years” and “more than three times” or severe enough to “limit his/her speech”; *moderate* symptoms if the child had “wheezing or whistling in the chest before the age of two years” and “in the past 12 months”; and *none* otherwise.

*Allergic rhinoconjunctivitis – severe* symptoms if the child had “sneezing, runny or stuffy nose in the past 12 months” and “more than five times a year”, and “itchy, watery eyes or tropical endemic limboconjunctivitis (TELC) in the past 12 months”; *moderate* symptoms if the child had “sneezing, runny or stuffy nose in the past 12 months”, and “itchy, watery eyes or TELC in the past 12 months”; and *none* otherwise.

*Atopic dermatitis – severe* symptoms if the child had “scaly or exudating, crusted and pruritic patches in the past 12 months” and “affecting any of the following characteristic areas: face, around the ears or eyes, folds of armpits or elbows or groin, behind the knees, under the buttocks”, and “onset of symptoms before the age of two years”; *moderate* symptoms if the child had “scaly or exudating, crusted and pruritic patches in the past 12 months” and

“affecting any of characteristic areas (see above)”, and “onset of symptoms before the age of four years”; and *none* otherwise.

The inter-relationships between variables reflecting the severity of symptoms of the three allergic diseases were used to identify children at high risk of atopy. The *high probability* group was defined by the prevalence of at least one of any *severe* symptoms or two of any *moderate* symptoms. The *probable* group was defined as those with *moderate* symptoms from one of the three allergic diseases and remaining children were classified in the *unlikely* group.

*Helminths*

Helminthic infections are common in this region and are known to modify the clinical course and outcome of both allergic diseases and malaria.<sup>31,32</sup> We therefore carried out a helminth survey for 91 individuals present during the cross-sectional survey. Diagnosis was performed by stool examination by microscope and by the Kato technique to search for the presence of *Ascaris lumbricoides*, hookworms (*Ancylostoma duodenale* and *Necator americanus*), whipworm (*Trichuris trichiuria*), *Schistosoma mansoni*, and *Strongyloides stercoralis*. Examination for pinworms (*Enterobius vermicularis*) was performed by the anal scotch-test. An anti-helminthic treatment was proposed for all infested individuals.

*Immunoglobulin E titres*

Specific IgE titres were measured by ELISA as previously described.<sup>33</sup> A panel of allergens of potential pertinence to the three classes of allergy was used: (i) Salivary gland extracts (SGE) of two mosquito species present in the study cohorts, *Aedes aegypti* and *Anopheles gambiae sensu stricto*, and (ii) *P. falciparum* parasite extract were prepared as previously described<sup>31</sup>; (iii) House dust mite spp. *Dermatophagoides farinae* and *Dermatophagoides pteronyssinus*; (iv) a mix of pollen allergens from five ubiquitous gramineae spp. [Cock’s-foot (*Dactylis glomerata*), Timothy grass (*Phleum pratense*), Sweet Vernal grass (*Anthoxanthum odoratum*), Perennial ryegrass (*Lolium perenne*), Kentucky Bluegrass (*Poa pratensis*)] (all from Stallergenes, France).

**Statistical analysis**

Statistical analyses were performed using R version 2.12.0 (The R Foundation for Statistical Computing, Vienna, Austria). To address the effect of allergic status on the risk of clinical *P.*

*falciparum* episodes, we performed Generalized Linear Mixed Models (GLMM) extended to pedigree data using the *pedigreemm* package for R to account for the non-independence of individuals because of family relationships, shared house and for repeated measures from the same individual (Technical Appendix). Correlated individual effects due to familial relationships were taken into account by using the pedigree-based genetic relatedness matrix that contains the genetic covariance among all pairs of individuals in the study cohort and is calculated using the pedigree information.<sup>34</sup> Shared house and repeated measures from the same individual were modelled as random effects. All random effects were assumed to be normally distributed, and conditional on these random effects, the dependent variable had: (i) a Binomial distribution when the studied phenotype was the occurrence of a clinical *P. falciparum* episode treated with anti-malarial therapy during a trimester, (ii) a Gaussian distribution when the studied phenotype was the logarithm of the maximum parasite density during a given clinical *P. falciparum* episode, and (iii) a Poisson distribution when the studied phenotype was the number of non-malaria episodes per trimester. The effects of allergy disease classes on these dependent variables were modelled as fixed effects. Allergy classes were reduced to two levels, *Severe* or *moderate* vs. *none* for analyses of asthma, atopic dermatitis and allergic rhinoconjunctivitis and *high probability* vs. *probable* and *unlikely* for atopic tendency. Co-variables included sickle cell trait<sup>33</sup>, gender, number of days present on site during the trimester, trimestrial incidence of *P. falciparum* and age. Age was initially analysed as a continuous covariate. To assess the age-specific effect of allergy, age was categorised into two levels (<3.5 years of age and ≥3.5 years of age, based on the age of peak clinical incidence) and allergy class was nested within age class. The age threshold was varied from 1.5 years to 5.5 years of age and the data re-analysed to assess at which age there was the strongest effect. The association of allergy classes with IgE levels was analysed by box-cox transforming the data and fitting a GLMM with a normal distribution.

## Results

Of the 205 eligible children aged under 15 years involved in the family-based longitudinal study, 175 (85.4 %) participated in the cross-sectional survey to assess the prevalence of related symptoms of allergic diseases. All eligible children present at the time of the survey

were included; no explicit refusal to participate was recorded. The study cohort was aged from 1 month to 14 years 11 months. The sex-ratio (male/female) was 0.94.

From 1994 until 2008, 143 of the children participating in the cross-sectional survey were present for at least 31 days in any trimester during the study period generating a total of 3,093 person-trimesters of presence (Supplementary Table S1). There were 2,065 treated *P. falciparum* clinical episodes (per individual: median 11, range 0-47)(Supplementary Table S2). The age peak of incidence of *P. falciparum* episodes occurred at 3 to 4 years of age (Figure 1). There were 1,868 non-malaria episodes (median 12, range 0-37) (Table S2). These non-malaria clinical presentations were associated with headache (38 %), chills (32 %), cough (13 %), vomiting (11 %) and diarrhoea (6 %).

The prevalence of moderate or severe asthma symptoms was respectively 2.3 % and 10.3 % (Table 1). The prevalence of moderate or severe allergic rhinoconjunctivitis symptoms was respectively 6.3 % and 10.3 %. The prevalence of moderate or severe atopic dermatitis symptoms was respectively 6.3 % and 2.9 %. On the basis of symptom severity, an atopic tendency was estimated to be unlikely for 68.0 %, probable for 9.1 % and highly probable for 22.9 % of the 175 children. The frequency of each allergy class in children for whom malaria data were available is shown in Table S1.

The risk of treated clinical *P. falciparum* infections was higher for children with high probability of atopy (OR 1.65, 95% confidence intervals 1.20 to 2.26;  $P=0.002$ ) (Table 2), after adjusting for age, sickle cell trait and the exposure level. Gender was not found to be significant. Analysing the impact of atopy in children younger and older than the peak age of clinical incidence (3 to 4 years old), revealed that atopy increased the risk of *P. falciparum* episodes in children at an age greater than 3.5 years (OR 2.02, 1.39 to 2.93;  $P=2\times 10^{-4}$ ), but not in children of age prior to the peak clinical incidence (OR 1.38, 0.92 to 2.08;  $P=0.124$ ) (Table 2). This increased risk resulted in an ever increasing cumulative number of *P. falciparum* episodes with age beyond that of peak clinical incidence (Figure 2. See supplementary Figure S2 for model predictions for comparison).

Analysis by allergy category revealed that asthma (severe or moderate) increases the risk of *P. falciparum* episodes (OR 2.12, 1.46 to 3.08;  $P=8\times 10^{-5}$ ) and this again only in children of age greater than 3.5 years old (OR 2.33, 1.50 to 3.61;  $P=1.5\times 10^{-4}$ ). Atopic dermatitis increased the risk of clinical malaria in children older (OR 3.15, 1.56 to 6.33;  $P=1.3\times 10^{-3}$ ) but

not younger than 3.5 years of age (Table 2). Allergic rhinoconjunctivitis was not associated with increased risk of clinical malaria at any age (Table 2). The impact of atopy, asthma and atopic dermatitis can be clearly seen in the ever-increasing number of cumulative *P. falciparum* episodes beyond the age of the onset of clinical immunity in the population, 3.5 years of age (Figure 2). There is no difference in the number of clinical malaria episodes prior to this age in individuals with or without an allergic condition. Analysis using different age thresholds (from 1.5 to 5.5 years of age) revealed similar OR for thresholds of 2.5, 3.5 and 4.5 years of age. The maximum OR for increased malaria occurred in children older than 4.5 years of age and with atopy or atopic dermatitis, whereas for the asthma group it occurred in children after 3.5 years of age (Supplementary Table S3).

There was no impact of any allergic disease on the number of non-malaria episodes by trimester (Supplementary Table S4).

The impact of atopy, asthma and atopic dermatitis on the maximum *P. falciparum* parasite density during a given clinical malaria episode mirrored that of the risk of *P. falciparum* episodes. Parasite density was significantly higher for children with allergic disease older than 3.5 years of age (Table 3 and supplementary Figure S3 for residuals of the fitted model). As the log-transformed data were left skewed, we additionally analysed using box-cox transformation and probit normalization of the data. The results were qualitatively the same (Supplementary text and Figures S4-S8). Allergic rhinoconjunctivitis had no impact on the parasite density (Table 3). Analysis using different age thresholds yielded similar qualitative conclusions as seen with the number of clinical episodes (Table S3).

Individuals with moderate or severe symptoms of atopic dermatitis had significantly higher specific IgE titres against *Ae. aegypti* ( $P=0.004$ ) and *An. gambiae* SGE ( $P<0.001$ ). There were no detectable specific anti-*P. falciparum* IgE. Individuals with moderate or severe symptoms of allergic rhinoconjunctivitis did not have significantly higher IgE titres against the tested gramineae ( $P=0.28$ ), although titres decreased with age ( $P=0.035$ ). There was also no effect of asthma on IgE titres against the house dust mite spp. tested (*D. farinae*  $P=0.60$  & *D. pteronyssinus*  $P=0.27$ ).

Only five individuals were infested with helminths (two *Ancylostoma*, one *Strongyloides*, one *Trichuris* and one *Enterobius*).

**Discussion**

**Principal findings**

Establishing the allergic status of children up to the age of 15 years old followed for malaria since birth, revealed an association of asthma and atopic dermatitis with susceptibility to clinical *P. falciparum* episodes. Importantly the increase in risk of malaria associated with these allergic conditions occurred after the peak clinical incidence of disease in the population, suggesting that they delay the development of clinical immunity to malaria.

**Strengths and weaknesses of the study**

The major strength of this study is the complete knowledge of the number of clinical *P. falciparum* malaria episodes each individual has had since birth and the exposure level per trimester over the 15 years covering the birth cohort. No other study has such detailed information for such a length of time. The major weakness of the study is the relatively small sample size, which would have reduced power to detect an association. In addition, although allergy diagnosis for children under 2 years of age is not considered reliable, there were only 15 individuals under 2 at the time of the allergy study of the 143 for whom malaria and allergy data were available.

**Meaning of the study**

Under intense malaria transmission, after repeated exposure to the parasite, children develop a clinical immunity<sup>35</sup>, whereby they tolerate elevated parasite densities without showing clinical symptoms. In this cohort, the population mean onset of clinical immunity occurred at 3 to 4 years of age. Although clinical immunity is accompanied by a reduction in parasite density, effective anti-parasite immunity develops much more slowly<sup>36</sup> with individuals achieving a state of premunition, whereby they maintain low-grade parasite densities in an asymptomatic state.<sup>37</sup> We show here that children with clinically defined asthma or atopic dermatitis have an increased risk of presenting with *P. falciparum* malaria episodes requiring treatment once passing the age of peak clinical incidence. They also had higher parasite density during clinical episodes, suggesting a reduced ability to control parasite replication. The observed increase in clinical incidence of malaria in patients with asthma or atopic dermatitis is not likely to be the result of increased frailty of such individuals; these individuals did not come more frequently to the clinic with non-malaria

1  
2  
3 symptoms. Our previous genome linkage study identifying chromosomal regions<sup>20</sup>  
4 associated with malaria that overlap with those previously shown to be linked to  
5 asthma/atopy suggests that there may be a shared genetic basis to these pathologies rather  
6 than any causative effect of one on the other. This is consistent with the increased  
7 susceptibility to malaria of mouse atopic models.<sup>23</sup>  
8  
9  
10

### 11 12 **Comparison with other studies**

13  
14 A previous study in Ethiopia (East Africa) found that a history of malaria (yes/no) increased  
15 risk of atopic dermatitis in 306 cases compared to 426 controls as characterized using the  
16 ISAAC questionnaire.<sup>22</sup> The only other epidemiological study that has previously examined  
17 the link between malaria and atopy<sup>38</sup> also interpreted the result from the perspective of the  
18 impact of malaria on atopy. They examined the re-infection rate with *P. falciparum* over a 5-  
19 year period in 91 children that were subsequently classified as atopic or not using skin prick  
20 tests (SPT) with house dust mite antigen. Their conclusion was that, as with measles<sup>13</sup> and  
21 tuberculosis<sup>15</sup>, malaria infection reduces atopy. However, the study lacked previous infection  
22 data since birth of the participating individuals and focussed on atopy as determined by SPT  
23 against a single allergen. The case-control study of atopic dermatitis risk factors cited above  
24 found no overall association between allergen skin sensitization and atopic dermatitis. We  
25 also found no evidence of increased IgE titres against house dust mites in the asthmatic or  
26 atopic dermatitis groups or against grass pollen in individuals with allergic  
27 rhinoconjunctivitis. Such differences likely reflect the different IgE reactivity profiles due to  
28 differences in allergen exposure in Africa.<sup>39</sup> There was no evidence of anti-parasite IgE in this  
29 cohort of children. We previously showed that circulating anti-parasite IgE titres were  
30 strongly positively correlated with anti-mosquito saliva IgE, but became undetectable  
31 following malaria exposure, potentially being bound to effector cells.<sup>33</sup> Only mosquito saliva,  
32 a known major local allergen, induced a specific IgE response at significantly higher titres in  
33 individuals with atopic dermatitis.  
34  
35  
36  
37  
38  
39  
40  
41  
42  
43  
44  
45  
46  
47  
48  
49

50 Although the immune effectors of clinical immunity are still poorly defined, there is strong  
51 evidence that acquired anti-parasite immunity is IgG-dependent<sup>8</sup> and cytophilic  
52 immunoglobulins (IgG1 & IgG3), which are capable of eliminating the parasites by  
53 opsonisation and/or by Antibody Dependent Cellular Immunity play an important role in  
54 premunity.<sup>37</sup> The higher parasite density during symptomatic episodes observed in the  
55  
56  
57  
58  
59  
60

asthma group suggests impaired development of acquired immunity. Impaired acquisition of immunity to malaria in children with asthma or atopic dermatitis may stem from their imbalanced Th1/Th2 response. Indeed, an atopic state may generate a tendency to develop a Th2 type immune response to *P. falciparum*. Dendritic cells that are oriented to a Th2 phenotype are more susceptible to orient the acquired immune response towards a Th2 profile.<sup>40</sup> Orientation of the immune response towards a Th2 profile by asthma or atopic dermatitis would result in a poor Th1 response (and hence development of protective IgG immunoglobulins), considered to be the dominant arm of the immune response enabling resistance to infectious disease in children.<sup>41</sup>

Many studies have revealed an important role of histamine, a key downstream effector molecule in allergic reaction, in the outcome of a malaria parasite infection.<sup>24-26,42-45</sup> Moreover, reports indicate that components of the innate immune system, including eosinophils, basophils, and mast cells (MCs), could play important roles in the pathogenesis of malaria.<sup>42</sup> Increased levels of histamine in plasma and tissue, derived from basophils and MCs, notably following stimulation by IgE through the high affinity receptor FcεR1, are associated with the severity of disease in humans infected with *P. falciparum* and in animal malaria models.<sup>25,26</sup> Chlorpheniramine, a H1 agonist reversed resistance to chloroquine and amodiaquine both *in vivo* and *in vitro*.<sup>43</sup> Moreover, astemizole, another H1 agonist, was identified as an anti-malarial agent in a clinical drug library screen.<sup>44</sup> Finally, *P. falciparum* produces translationally controlled tumor protein, which is a homolog of the mammalian histamine-releasing factor that causes histamine release from human basophils.<sup>45</sup>

**Further research**

Our results provide the first birth cohort study addressing the link between malaria and allergic diseases. They contribute to a growing body of evidence that the pathologies are related. ISAAC has revealed a steady but significant increase in prevalence rates of asthma and allergic diseases in Africa. Whilst the majority of studies have focused on large cities, there is increasing urbanization throughout Africa, as well as improved access to primary health care in many areas. A key concern for ISAAC is the extent to which such societal evolution will result in an increase in allergic diseases. Increased urbanization in sub-Saharan Africa is changing the epidemiology of malaria and although resulting in a decrease in risk, will result in more severe clinical malaria in older individuals.<sup>46,47</sup> Moreover, a large

consumption of anti-malarial drugs in the urban areas provides substantial drug pressure fostering, the selection of drug-resistant parasites. Despite the encouraging recent decrease in malaria incidence rates, even in rural areas, an additional significant concern is the extent to which such an increase in allergy will exacerbate the burden of malaria. Given the demonstrated anti-parasitic effect of anti-histamines,<sup>48</sup> administration of anti-histamines to atopic children will likely reduce the burden of clinical malaria in these children, increase the efficacy of first-line treatment anti-malarials<sup>49</sup> and alleviate the non-infectious consequences of atopy. Clinical intervention studies should be envisaged.

### What is already known on this topic

There are several reports of the beneficial effects of anti-histamines for malaria chemoprophylaxis<sup>24-26,48</sup> as well as our previous work<sup>20</sup> showing that chromosomal regions associated with malaria are also linked to allergy and atopy.<sup>17-19</sup> There are two epidemiological studies showing opposite effects of malaria on atopy.<sup>22,38</sup>

### What this study adds

Using a longitudinal malaria study birth cohort, we identified an association of asthma and atopic dermatitis with susceptibility to clinical *P. falciparum* episodes. Importantly the increase in risk of malaria associated with these allergic conditions occurred only after the peak clinical incidence of disease in the population, suggesting that they delay the development of clinical immunity to malaria.

We are grateful to the villagers of Dielmo for their participation and sustained collaboration in this project as well as the field workers (Abdoulaye Badiane) and the data manager (Joseph Faye) for their contribution to the project and in generating and maintaining the malaria database. We are indebted to Michel Thiakane, a paediatric allergologist, head of the Paediatric Service, Principal hospital, Dakar, Senegal and Marie-Thérèse Guinnepain, dermatologist, Institut Pasteur clinic, Paris, France for aid in elaborating the ISAAC questionnaire and advising on clinical diagnosis of allergy in Senegal. We specially thank the children and parents or guardians who participated in the cross-sectional survey 'Pallergo'. We thank the International Division of the Institut Pasteur that has given full support to this study.

STROBE: This article has been prepared according to the STROBE checklist guidelines.

Funding: Institut Pasteur de Dakar, Institut Pasteur and Agence Nationale de la Recherche, France (ANR 11-BSV1-027-01). The funding source had no role in study design, data collection, data analysis, data interpretation, or writing of the report. The corresponding author had full access to all the data in the study and had final responsibility for the decision to submit for publication.

Contributors: LB, SM, and RP made substantial contributions to the concept and design of the study. MH, HB, BG, SB, FDS, and AT were involved in acquisition of the data. CL, AF, OMP, AS and RP contributed to the analysis and interpretation of the data. MH, CL, HB, BG, SB, FDS, AF, AT, LB, OMP, SM, AS and RP critically reviewed the report and approved its final version for submission. All authors had full access to all of the data in the study and can take responsibility for the integrity of the data and the accuracy of the data analysis. MH and RP are guarantors.

Competing interests: All authors have completed the ICMJE uniform disclosure form at [www.icmje.org/coi\\_disclosure.pdf](http://www.icmje.org/coi_disclosure.pdf) (available on request from the corresponding author) and declare: no financial relationships with any organisations that might have an interest in the submitted work in the previous three years; no other relationships or activities that could appear to have influenced the submitted work.

Ethical approval: The allergy study was approved by the Senegalese National Ethics committee (2009/N°46). Renewed approval of the longitudinal malaria study was obtained from the same committee (2006/N°969).

Data sharing: The allergy database will be made available on-line. The longitudinal malaria data set will be made available following discussion with the coordinators of the three Institutes that govern the dataset through contact with the corresponding author.

Copyright: The Corresponding Author has the right to grant on behalf of all authors and does grant on behalf of all authors, a worldwide licence to the Publishers and its licensees in perpetuity, in all forms, formats and media (whether known now or created in the future), to i) publish, reproduce, distribute, display and store the Contribution, ii) translate the Contribution into other languages, create adaptations, reprints, include within collections

and create summaries, extracts and/or, abstracts of the Contribution, iii) create any other derivative work(s) based on the Contribution, iv) to exploit all subsidiary rights in the Contribution, v) the inclusion of electronic links from the Contribution to third party material where-ever it may be located; and, vi) licence any third party to do any or all of the above.

## References

1. WAO, World Allergy Organization - <http://www.worldallergy.org/index.php>. 2010.
2. Asher MI, Montefort S, Björkstén B, Lai CK, Strachan DP, Weiland SK, et al. Worldwide time trends in the prevalence of symptoms of asthma, allergic rhinoconjunctivitis, and eczema in childhood: ISAAC Phases One and Three repeat multicountry cross-sectional surveys. *Lancet* 2006; 368: 733-43.
3. Mosmann TR, Coffman RL. TH1 and TH2 cells: different patterns of lymphokine secretion lead to different functional properties. *Ann Rev Immunol* 1989; 7: 145–73.
4. Zhu J, Paul WE. CD4 T cells: fates, functions, and faults. *Blood* 2008; 112: 1557–69.
5. Elghazali G, Perlmann H, Rutta AS, Perlmann P, Troye-Blomberg M. Elevated plasma levels of IgE in *Plasmodium falciparum*-primed individuals reflect an increased ratio of IL-4 to interferon-gamma (IFN-gamma)-producing cells. *Clin Exp Immunol* 1997; 109: 84-9.
6. Perlmann P, Perlmann H, ElGhazali G, Blomberg MT. IgE and tumor necrosis factor in malaria infection. *Immunol Lett* 1999; 65: 29-33.
7. Tangteerawatana P, Perlmann H, Hayano M, Kalambaheti T, Troye-Blomberg M, Khusmith S. IL4 gene polymorphism and previous malaria experiences manipulate anti-*Plasmodium falciparum* antibody isotype profiles in complicated and uncomplicated malaria. *Malaria J* 2009 ; 8: 286-95.
8. Cohen S, McGregor IA, Carrington S. Gamma-globulin and acquired immunity to human malaria. *Nature* 1961; 192: 733–7.
9. Perlmann H, Helmbj H, Hagstedt M, Carlson J, Larsson PH, Troye-Blomberg M, et al. IgE elevation and IgE anti-malarial antibodies in *Plasmodium falciparum*

malara:association of high IgE levels with cerebral malaria. *Clin Exp Immunol* 1994; 97: 284-92.

10. Duarte J, Deshpande P, Guiyedi V, Mécheri S, Fesel C, Cazenave PA, et al. Total and functional parasite specific IgE responses in Plasmodium falciparum-infected patients exhibiting different clinical status. *Malar J* 2007; 6:1.

11. Stein RT, Sherrill D, Morgan WJ, Holberg CJ, Halonen M, Taussig LM et al. Respiratory syncytial virus in early life and risk of wheeze and allergy by age 13 years. *Lancet* 1999; 354: 541-5.

12. Sigurs N, Gustafsson PM, Bjarnason R, Lundberg F, Schmidt S, Sigurbergsson F et al. Severe respiratory syncytial virus bronchiolitis in infancy and asthma and allergy at age 13. *Am J Resp Crit Care Med* 2005; 171: 137-41.

13. Shaheen SO, Aaby P, Hall AJ, Barker DJ, Heyes CB, Shiell AW, et al. Measles and atopy Guinea-Bissau. *Lancet* 1996; 347: 1792-96.

14. McIntire JJ, Umetsu SE, Macaubas C, Hoyte EG, Cinnioğlu C, Cavalli-Sforza LL et al. Immunology: hepatitis A virus link to atopic disease. *Nature* 2003; 425: 576.

15. Shirakawa T, Enomoto T, Shimazu S, Hopkin JM. The inverse association between tuberculin responses and atopic disorder. *Science* 1997; 275: 77-9.

16. Gould HJ, Takhar P, Harries HE, Chevetton E, Sutton BJ. The allergic march from *Staphylococcus aureus* superantigens to immunoglobulin E. *Chem Immunol Allergy* 2007; 93: 106-36.

17. Jang N, Stewart G, Jones G. Polymorphisms within the PHF11 gene at chromosome 13q14 are associated with childhood atopic dermatitis. *Genes Immun* 2005; 6: 262-4.

18. Kurz T, Hoffjan S, Hayes MG, Schneider D, Nicolae R, Heinzmann A, et al. Fine mapping and positional candidate studies on chromosome 5p13 identify multiple asthma susceptibility loci. *J Allergy Clin Immunol* 2006; 118: 396-402.

19. Zhang Y, Leaves NI, Anderson GG, Ponting CP, Broxholme J, Holt R, et al. Positional cloning of a quantitative trait locus on chromosome 13q14 that influences immunoglobulin E levels and asthma. *Nat Genet* 2003; 34: 181-6.

20. Sakuntabhai A, Ndiaye R, Casademont I, Peerapittayamongkol C, Rogier C, Tortevoeye P, et al. Genetic determination and linkage mapping of *Plasmodium falciparum* malaria related traits in Senegal. *PLoS ONE* 2008; 3: e2000.
21. Cargill M, Schrodi SJ, Chang M, Garcia VE, Brandon R, et al. A large-scale genetic association study confirms IL12B and leads to the identification of IL23R as psoriasis-risk genes. *Am J Hum Genet* 2007; 80: 273-90.
22. Haileamlak A, Dagoye D, Williams H, Venn AJ, Hubbard R, Britton J, et al. Early life risk factors for atopic dermatitis in Ethiopian children. *J Allergy Clin Immunol* 2005; 115: 370-6.
23. Kohara Y, Tanabe K, Matsuoka K, Kanda N, Matsuda H, Karasuyama H, et al. A major determinant quantitative-trait locus responsible for atopic dermatitis-like skin lesions in NC/Nga mice is located on Chromosome 9. *Immunogenetics* 2001; 53: 15-21.
24. Beghdadi W, Porcherie A, Schneider BS, Dubayle D, Peronet R, Huerre M, et al. Inhibition of histamine-mediated signaling confers significant protection against severe malaria in mouse models of disease. *J Exp Med* 2008; 205: 395-408.
25. Srichaikul T, Archararit N, Siriasawakul T, Viriyapanich T. Histamine changes in *Plasmodium falciparum* malaria. *Trans R Soc Trop Med Hyg* 1976; 70: 36-8.
26. Bhattacharya U, Roy S, Kar PK, Sarangi B, Lahiri SC. Histamine & kinin system in experimental malaria. *Indian J Med Res* 1988; 88: 558-63.
27. Trape JF, Tall A, Diagne N, Ndiath O, Ly AB, Faye J, et al. Malaria morbidity and pyrethroid resistance after the introduction of insecticide-treated bednets and artemisinin-based combination therapies: a longitudinal study. *Lancet Infect Dis* 2011; 11: 925-32.
28. Abecasis GR, Cherny SS, Cookson WO, Cardon LR. Merlin-- rapid analysis of dense genetic maps using sparse gene flow trees. *Nat Genet* 2001; 30: 97-101.
29. Asher MI, Keil U, Anderson HR, Beasley R, Crane J, Martinez F, et al. International Study of Asthma and Allergies in Childhood (ISAAC): rationale and methods. *Eur Respir J* 1995; 8: 483-91.

30. Yamada E, Vanna AT, Nasпитz CK, Solé D. International Study of Asthma and Allergies in Childhood (ISAAC): validation of the written questionnaire (eczema component) and prevalence of atopic eczema among Brazilian children. *J Investig Allergol Clin Immunol* 2002; 12: 34-41.

31. Nacher M. Malaria vaccine trials in a wormy world. *Trends Parasitol* 2001; 17: 563-5

32. Yazdanbakhsh M, Kremsner PG, van Ree R. Allergy, parasites, and the hygiene hypothesis. *Science* 2002; 296: 490-4.

33. Lawaly R, Konate L, Marrama L, Dia I, Diallo D, Diène Sarr F, et al. Impact of mosquito bites on asexual parasite density and gametocyte prevalence in asymptomatic chronic *Plasmodium falciparum* infections and correlation with IgE and IgG titres. *Infection and Immunity* 2012; 80: 2240-6.

34. Machado A, Loucoubar C, Grange L, Bureau JF, Sakuntabhai A, Paul R. Human genetic contribution to the outcome of infection with malaria parasites. In: MALARIA PARASITES, ISBN: 979-953-307-072-7, Okwa O (Ed.), INTECH, Rijeka 2012; 267-292.

35. Doolan DL, Dobaño C, Baird JK. Acquired Immunity to Malaria. *Clin Microbiol Rev* 2009; 22: 13–36.

36. Marsh K, Snow RW. Host-parasite interaction and morbidity in malaria endemic areas. *Philos Trans R Soc London B* 1997; 352: 1385–94.

37. Perignon JL, Druilhe P. Immune mechanisms underlying the premonition against *Plasmodium falciparum* malaria. *Mem Inst Oswaldo Cruz* 1994; 89 Suppl. 2: 51–3.

38. Lell B, Borrmann S, Yazdanbakhsh M, Kremsner PG. Atopy and malaria. *Wien Klin Wochenschr* 2001; 113: 927-9.

39. Westritschnig K, Sibanda E, Thomas W, Auer H, Aspöck H, Pittner G, et al. Analysis of the sensitization profile towards allergens in central Africa. *Clin Exp Allergy* 2003; 33: 22-7.

40. de Jong EC, Vieira PL, Kalinski P, Schuitemaker JH, Tanaka Y, Wierenga EA et al. Microbial compounds selectively induce Th1 cell-promoting or Th2 cell-promoting dendritic cells *in vitro* with diverse Th cell-polarizing signals. *J Immunol* 2002; 168: 1704–9.

41. Baird JK. Age-dependent characteristics of protection versus susceptibility to *Plasmodium falciparum*. *Ann Trop Med Parasitol* 1998; 92: 367–90.
42. Mecheri S. Contribution of allergic inflammatory response to the pathogenesis of malaria disease. *Biochim Biophys Acta* 2011; 1822: 49-56.
43. Sowunmi A, Gbotosho GO, Happi CT, Adedeji AA, Bolaji OM, Fehintola FA, et al. Enhancement of the antimalarial efficacy of amodiaquine by chlorpheniramine in vivo. *Mem Inst Oswaldo Cruz* 2007; 102: 417-9.
44. Chong CR, Chen X, Shi L, Liu JO, Sullivan DJ. A clinical drug library screen identifies astemizole as an antimalarial agent. *Nat Chem Biol* 2006; 2: 415-416.
45. MacDonald SM, Bhisutthibhan J, Shapiro TA, Rogerson SJ, Taylor TE, Tembo M, et al. Immune mimicry in malaria: *Plasmodium falciparum* secretes a functional histamine-releasing factor homolog *in vitro* and *in vivo*. *Proc Natl Acad Sci USA* 2001; 98: 10829-32.
46. De Silva PM, Marshall JM. Factors contributing to urban malaria transmission in sub-Saharan Africa: a systematic review. *J Trop Med* 2012; doi: 10.1155/2012/819563.
47. Bob NS, Diop BM, Renaud F, Marrama L, Durand P, Tall A, et al. Parasite polymorphism and severe malaria in Dakar (Senegal): a West African urban area. *PLoS One* 2010; 5: e9817.
48. Musonda CC, Whitlock GA, Witty MJ, Brun R, Kaiser M. Chloroquine-astemizole hybrids with potent *in vitro* and *in vivo* antiplasmodial activity. *Bioorg Med Chem Lett* 2009; 19: 481-4.
49. Egan TJ, Kaschula CH. Strategies to reverse drug resistance in malaria. *Curr Opin Infect Dis* 2007; 20: 598-604.

**Table 1 Classification of Asthma, Allergic rhinoconjunctivitis, Atopic dermatitis and overall Atopic status according to ISAAC questionnaire in children aged 0-14 from a malaria birth cohort.** N is total number of children examined and n-malaria represents those for whom malaria data were recorded. F is the number of females and M the number of males.

|                                     | N (F/M)     | %     | n-malaria (F/M) |
|-------------------------------------|-------------|-------|-----------------|
| <b>Asthma symptoms</b>              |             |       |                 |
| None                                | 153 (73/80) | 87.43 | 125 (59/66)     |
| Moderate                            | 4 (1/3)     | 2.29  | 4 (1/3)         |
| Severe                              | 18 (6/12)   | 10.29 | 14 4/10)        |
| <b>Rhinoconjunctivitis symptoms</b> |             |       |                 |
| None                                | 146 (64/82) | 83.43 | 120 (52/68)     |
| Moderate                            | 11 (8/3)    | 6.29  | 9(6/3)          |
| Severe                              | 18 (6/12)   | 10.29 | 14 (6/8)        |
| <b>Atopic dermatitis symptoms</b>   |             |       |                 |
| None                                | 159 (75/84) | 90.86 | 128 (60/68)     |
| Moderate                            | 11 (1/10)   | 6.29  | 11 (1/10)       |
| Severe                              | 5 (4/1)     | 2.86  | 4 (3/1)         |
| <b>Atopic tendency</b>              |             |       |                 |
| Unlikely                            | 119 (56/63) | 68.00 | 97 (46/51)      |
| Probable                            | 16 (8/8)    | 9.14  | 14 (6/8)        |
| Highly probable                     | 40 (16/24)  | 22.86 | 32 (12/20)      |

**Table 2 Impact of allergy status on risk of *P. falciparum* clinical episodes.** Shown are the *P* values and adjusted Odds Ratios with 95% confidence intervals calculated from the mixed model analyses. Values for the covariables Age ( $\geq 3.5$  years of age compared to  $< 3.5$  years of age), Trimestrial incidence of *P. falciparum* clinical episodes and HbAS (beta-globin sickle cell trait; AS compared to AA) are those from the Asthma model analysis. For clarity significant co-variables are shown in bold.

|                       | Age groups $< 3.5$ years     | ORa         | 95% Confidence Intervals |             | <i>P</i> value                          |
|-----------------------|------------------------------|-------------|--------------------------|-------------|-----------------------------------------|
|                       |                              |             | Lower                    | Upper       |                                         |
| Atopy                 | <b>Both</b>                  | <b>1.65</b> | <b>1.20</b>              | <b>2.26</b> | <b><math>2.0 \times 10^{-3}</math></b>  |
|                       | $< 3.5$                      | 1.38        | 0.92                     | 2.08        | 0.124                                   |
|                       | <b><math>\geq 3.5</math></b> | <b>2.02</b> | <b>1.39</b>              | <b>2.93</b> | <b><math>2.1 \times 10^{-4}</math></b>  |
| Asthma                | <b>Both</b>                  | <b>2.12</b> | <b>1.46</b>              | <b>3.08</b> | <b><math>8.0 \times 10^{-5}</math></b>  |
|                       | $< 3.5$                      | 1.50        | 0.90                     | 2.50        | 0.122                                   |
|                       | <b><math>\geq 3.5</math></b> | <b>2.33</b> | <b>1.50</b>              | <b>3.61</b> | <b><math>1.5 \times 10^{-4}</math></b>  |
| Atopic dermatitis     | Both                         | 1.05        | 0.65                     | 1.70        | 0.842                                   |
|                       | $< 3.5$                      | 0.84        | 0.49                     | 1.46        | 0.539                                   |
|                       | <b><math>\geq 3.5</math></b> | <b>3.15</b> | <b>1.56</b>              | <b>6.33</b> | <b><math>1.3 \times 10^{-3}</math></b>  |
| Rhinoconjunctivitis   | Both                         | 0.96        | 0.65                     | 1.41        | 0.818                                   |
|                       | $< 3.5$                      | 1.05        | 0.64                     | 1.72        | 0.853                                   |
|                       | $\geq 3.5$                   | 0.95        | 0.60                     | 1.52        | 0.834                                   |
| Age $\geq 3.5$        |                              | <b>0.48</b> | <b>0.40</b>              | <b>0.57</b> | <b><math>2.7 \times 10^{-15}</math></b> |
| Trimestrial incidence |                              | <b>1.01</b> | <b>1.00</b>              | <b>1.01</b> | <b><math>1.8 \times 10^{-6}</math></b>  |
| HbAS                  |                              | <b>0.24</b> | <b>0.12</b>              | <b>0.47</b> | <b><math>3.7 \times 10^{-5}</math></b>  |

**Table 3 Impact of allergy status on the maximum *P. falciparum* parasite density during a clinical malaria episode.** Shown are the back-transformed mean parasite densities per microlitre and standard errors (SEM) estimated from the GLMM analyses after taking into account the other co-variables. Significantly different effects are shown in bold for clarity.

| Allergic condition  | Age groups | Allergic status<br>(No/Yes) | Mean parasite density | SEM  | P value                     |
|---------------------|------------|-----------------------------|-----------------------|------|-----------------------------|
| Atopy               | Both       | N                           | <b>76.3</b>           | 13.8 |                             |
|                     |            | Y                           | <b>131.0</b>          | 36.4 | <b>0.0158</b>               |
|                     | <3.5       | N                           | 114.3                 | 23.7 |                             |
|                     |            | Y                           | 171.1                 | 56.0 | 0.148                       |
|                     | ≥3.5       | N                           | <b>48.4</b>           | 9.8  |                             |
|                     |            | Y                           | <b>114.8</b>          | 37.1 | <b>9.5x10<sup>-4</sup></b>  |
| Asthma              | Both       | N                           | <b>78.1</b>           | 14.4 |                             |
|                     |            | Y                           | <b>148.5</b>          | 44.3 | <b>3.8 x10<sup>-3</sup></b> |
|                     | <3.5       | N                           | 114.8                 | 24.3 |                             |
|                     |            | Y                           | 171.9                 | 74.5 | 0.167                       |
|                     | ≥3.5       | N                           | <b>51.3</b>           | 9.7  |                             |
|                     |            | Y                           | <b>105.3</b>          | 41.0 | <b>6.2 x10<sup>-3</sup></b> |
| Atopic dermatitis   | Both       | N                           | 82.6                  | 15.0 |                             |
|                     |            | Y                           | 93.9                  | 38.9 | 0.605                       |
|                     | <3.5       | N                           | 122.6                 | 25.5 |                             |
|                     |            | Y                           | 133.9                 | 63.5 | 0.425                       |
|                     | ≥3.5       | N                           | <b>52.3</b>           | 11.0 |                             |
|                     |            | Y                           | <b>135.4</b>          | 70.7 | <b>0.014</b>                |
| Rhinoconjunctivitis | Both       | N                           | 81.5                  | 14.8 |                             |
|                     |            | Y                           | 111.4                 | 39.0 | 0.570                       |
|                     | <3.5       | N                           | 118.8                 | 25.1 |                             |
|                     |            | Y                           | 166.3                 | 69.9 | 0.537                       |
|                     | ≥3.5       | N                           | 54.6                  | 11.3 |                             |
|                     |            | Y                           | 80.9                  | 33.7 | 0.327                       |

**Figure 1** Annual incidence rate of clinical *P. falciparum* episodes per 100 children (bold line). In order to overcome the fluctuations of the annual incidence rate, we fit second (dotted line), third (dashed line) and fourth (solid line) degree polynomial trend lines to the data (bold line). The corresponding R-squared values are 0.70, 0.91 and 0.99 respectively indicating an accurate fit for third and fourth order polynomials. The inflexion on these two trend lines indicates the onset of acquisition of clinical immunity at approximately 3 to 4 years of age.



**Figure 2** Mean cumulative number of *P. falciparum* clinical episodes with age for the (A) Asthma, (B) Rhinoconjunctivitis and (C) Atopic dermatitis classes and overall Atopy class (D) (bold lines) compared to individuals without symptoms of each respective allergy type (thin lines). In all cases moderate and severe classes are combined and compared to individuals without allergy symptoms. Note there are no children older than 11 years of age with Atopic dermatitis.



### Pedigree-based genetic relatedness

The Genetic covariance between two individuals can be computed using the pedigree information. For individuals A and B, a given pair in a pedigree, the genetic covariance is computed as  $r(A,B) = 2 \times \text{coancestry}(A,B)$  where the *coancestry* between A and B is calculated referring to the method presented by Falconer and Mackay in 1996 (Falconer and Mackay 1996):  $\text{coancestry}(A,B) = \sum_p (1/2)^{n(p)} \times (1 + I_{\text{Common Ancestor}})$  where  $p$  is the number of paths in the pedigree linking A and B,  $n(p)$  the number of individuals (including A and B) for each path  $p$  and  $I_X$  is the *inbreeding* coefficient of X also equal to the *coancestry* between the two parents of X,  $I_X$  is set to 0 if X is a founder.

**Illustration:** Consider, as an example, the pedigree below containing 18 individuals named {A, B, ..., R} for the calculation of genetic covariance's.



**Pedigree structure.**

The genetic relatedness between individuals N and O is equal to 0.266. This value is calculated as followed:

The number of paths linking N and O from the pedigree structure above is  $p = 2$ .

As illustrated below:

- **Path 1** contains  $n(1) = 3$  individuals {N, K, O} with K as the common ancestor. Inbreeding coefficient of K,  $I_K$ , is the *coancestry* between the two parents of K (F and G) and is null because F and G are not genetically linked.
- **Path 2** contains  $n(2) = 7$  individuals {N, K, F, B, H, L, O} with B as the common ancestor. Inbreeding coefficient of B,  $I_B$ , is null because B is a founder.

Therefore, genetic relatedness between individuals N and O is:

$$= 2 \times (0.5^{n(1)} \times (1 + I_K) + 0.5^{n(2)} \times (1 + I_B))$$

$$= 2 \times (0.5^3 \times (1 + 0) + 0.5^7 \times (1 + 0)) = 0.266$$

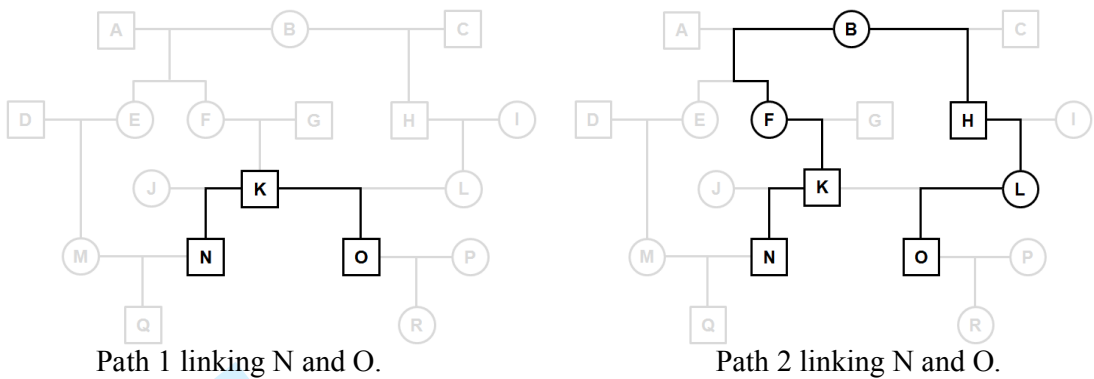

Defining an equivalent model design where individual effects are independent using the genetic relatedness matrix:

Let us rename  $Y^* = l(\mu)$ .  $Y^*$  can be consider as a linearization of the phenotype through the link function  $l$ . The expected mean of  $Y^*$  and the variance of  $Y^*$  are:

(i)  $E(Y^*) = E(X\beta + Z\gamma + \varepsilon)$   
 $= E(X\beta) + E(Z\gamma) + E(\varepsilon) = X \times E(\beta) + Z \times E(\gamma) + E(\varepsilon)$   
 $= X\beta$  (asymptotically).

(ii)  $Var(Y^*) = Var(X\beta + Z\gamma + \varepsilon)$   
 $= Var(Z\gamma + \varepsilon)$  (as  $X\beta$  is the fixed part, thus has variance equal to 0)  
 $= Var(Z\gamma) + Var(\varepsilon)$  (as  $\gamma$  and  $\varepsilon$  are independent)  
 $= Z \times Var(\gamma) \times Z^T + Var(\varepsilon)$  ( $Z^T$  is the transpose of  $Z$ )  
 $= Z(A\sigma_g^2)Z^T + I\sigma_r^2$   
 $= ZAZ^T\sigma_g^2 + I\sigma_r^2$

If individuals were independent, i.e.  $A = I_N$ , variance of  $Y^*$  could be expressed as  $ZZ^T\sigma_g^2 + I\sigma_r^2$ . However, using linear algebra theory by the method “Cholesky decomposition of a matrix”, we can show that there is an equivalent expression of the variance of  $Y^*$  corresponding to the modeling of data from independent individuals, having  $\gamma^*$  as an equivalent vector of random effects and  $Z^*$  an equivalent design matrix relating  $\gamma^*$  to  $Y^*$  so that:  
 $Var(Y^*) = Z^*(I\sigma_g^2)Z^{*T} + I\sigma_r^2$ .  $I\sigma_g^2$  is then the covariance matrix of the equivalent independent random individual effects  $\gamma^*$ .

**Theorem: Cholesky decomposition of a matrix**

If  $A$  is a symmetric positive-definite matrix, there is a triangular matrix  $L$  so that  $A$  can be written as  $A = LL^T$ .  $L$  can be seen as the “square root” of the matrix  $A$ .  
Note that the genetic relatedness matrix  $A$  computed using the pedigree information (Falconer and Mackay 1996) is a positive-definite matrix, unless identical twins are in the pedigree in which case it would be positive semi-definite.

**Equivalent model with independent random effects:** We set  $A = LL^T$  then:

$$Var(Y^*) = Z(A\sigma_g^2)Z^T + I\sigma_r^2$$
$$= Z(LL^T\sigma_g^2)Z^T + I\sigma_r^2$$

$$\begin{aligned}
 &= ZLL^T Z^T \sigma_g^2 + I\sigma_r^2 \\
 &= (ZL)(ZL)^T \sigma_g^2 + I\sigma_r^2 \\
 &= (Z^*)(Z^*)^T \sigma_g^2 + I\sigma_r^2 \quad (\text{where we set } Z^* = ZL)
 \end{aligned}$$

Then, if we define  $\gamma^* = L^{-1}\gamma$ , we can rewrite the model as:

$$Y^* = X\beta + Z^*\gamma^* + \varepsilon \quad (\text{because } Z\gamma = Z(LL^{-1})\gamma = (ZL)(L^{-1}\gamma) = Z^*\gamma^*),$$

and the  $\gamma_i^*$  are independent, in other terms  $\text{Var}(\gamma^*) = I\sigma_g^2$ , as demonstrated below:

We assumed that  $\gamma \sim N(0, A\sigma_g^2)$ . Then  $\gamma^* = L^{-1}\gamma$  is also distributed as a multivariate Normal with mean  $E(\gamma^*) = L^{-1}E(\gamma) = L^{-1} \times 0 = 0$  and variance:

$$\begin{aligned}
 \text{Var}(\gamma^*) &= (L^{-1}) \times \text{Var}(\gamma) \times (L^{-1})^T \\
 &= (L^{-1}) \times A\sigma_g^2 \times (L^{-1})^T = (L^{-1})LL^T(L^{-1})^T \sigma_g^2 \\
 &= (L^{-1}L)(L^{-1}L)^T \sigma_g^2 \\
 &= I\sigma_g^2
 \end{aligned}$$

The random effects are now independent and then the classical mixed model assuming independence between levels (here individuals) is applied, and the estimate of fixed effects obtained are fine, i.e. corrected for genetic relationships.

## References

Falconer DS, Mackay TFC (1996) Introduction to Quantitative Genetics. 4<sup>th</sup> Edn. London: Longman.

1  
2  
3  
4  
5  
6  
7  
8  
9  
10  
11  
12  
13  
14  
15  
16  
17  
18  
19  
20  
21  
22  
23  
24  
25  
26  
27  
28  
29  
30  
31  
32  
33  
34  
35  
36  
37  
38  
39  
40  
41  
42  
43  
44  
45  
46  
47  
48  
49

Supplementary Tables

**Table S1 Number of person-trimesters contributed by number of children by age class and the number who had severe/moderate allergy symptoms, for whom malaria data were also available.** AS – Asthma, AD – Atopic dermatitis, RC – Rhinoconjunctivitis. Shown also are the numbers of these individuals suffering from two or all three allergy conditions.

| Age group | N° person-trimesters | N° people | AS | AD | RC | AS+AD | AS+RC | AD+RC | AS+AD+RC |
|-----------|----------------------|-----------|----|----|----|-------|-------|-------|----------|
| ]1        | 7                    | 6         | 1  | 2  | 2  | 0     | 1     | 0     | 0        |
| ]2        | 21                   | 9         | 0  | 1  | 3  | 0     | 0     | 0     | 0        |
| ]3        | 48                   | 11        | 1  | 1  | 2  | 0     | 0     | 1     | 0        |
| ]4        | 119                  | 12        | 1  | 2  | 3  | 0     | 0     | 1     | 0        |
| ]5        | 102                  | 11        | 3  | 4  | 3  | 2     | 1     | 2     | 1        |
| ]6        | 125                  | 11        | 1  | 1  | 0  | 0     | 0     | 0     | 0        |
| ]7        | 303                  | 11        | 1  | 2  | 1  | 1     | 0     | 0     | 0        |
| ]8        | 340                  | 12        | 1  | 1  | 1  | 1     | 0     | 0     | 0        |
| ]9        | 362                  | 10        | 2  | 0  | 1  | 0     | 1     | 0     | 0        |
| ]10       | 610                  | 17        | 1  | 0  | 3  | 0     | 0     | 0     | 0        |
| ]11       | 77                   | 4         | 2  | 1  | 0  | 0     | 0     | 0     | 0        |
| ]12       | 484                  | 16        | 3  | 0  | 3  | 0     | 1     | 0     | 0        |
| ]13       | 390                  | 10        | 1  | 0  | 0  | 0     | 0     | 0     | 0        |
| ]14       | 105                  | 3         | 0  | 0  | 1  | 0     | 0     | 0     | 0        |
| Total     | 3093                 | 143       | 18 | 15 | 23 | 4     | 4     | 4     | 1        |

**Table S2 Summary of total number of person-trimesters with non-malaria and symptomatic *P. falciparum* clinical presentations and total number of non-malaria episodes according to age class.** Given are the number of people contributing to each type of presentation.

|                                                   | Age group (years) |      |
|---------------------------------------------------|-------------------|------|
|                                                   | <3·5              | ≥3·5 |
| Total person-trimesters                           | 1283              | 1810 |
| People                                            | 126               | 113  |
| Total <i>P. falciparum</i> symptomatic trimesters | 963               | 1102 |
| People                                            | 114               | 108  |
| Total non-malaria episodes                        | 754               | 1114 |
| People                                            | 123               | 109  |

**Table S3 Effect of changing age threshold on impact of allergy on the risk of clinical malaria and concomitant parasite density.** Given are Odds Ratio with 95% confidence intervals, for clinical malaria episodes and the beta coefficient and standard error for parasite density. Corresponding P values are also given. Values are from the nested GLMM analyses.

| A. Malaria episodes |      |                 |          |      |                 |         | B. Parasite density |                 |          |                 |          |
|---------------------|------|-----------------|----------|------|-----------------|---------|---------------------|-----------------|----------|-----------------|----------|
| Age cut-off (years) | OR   | 95% CI          | P value  | OR   | 95% CI          | P value | Age cut-off         | beta coeff (se) | P value  | beta coeff (se) | P value  |
| Atopy               |      | above threshold |          |      | below threshold |         | Atopy               | above threshold |          | below threshold |          |
| 1.5                 | 1.80 | 1.25-2.59       | 1.7x10-3 | 1.57 | 0.85-2.89       | 0.15    | 1.5                 | 0.70 (0.27)     | 9.2x10-3 | 0.54 (0.35)     | 0.12     |
| 2.5                 | 2.00 | 1.39-2.88       | 2.0x10-4 | 1.23 | 0.76-1.99       | 0.40    | 2.5                 | 0.79 (0.26)     | 2.6x10-3 | 0.35 (0.29)     | 0.23     |
| 3.5                 | 2.02 | 1.39-2.93       | 2.1x10-4 | 1.38 | 0.92-2.08       | 0.12    | 3.5                 | 0.85 (0.26)     | 9.5x10-4 | 0.37 (0.26)     | 0.15     |
| 4.5                 | 2.10 | 1.42-3.10       | 1.6x10-4 | 1.41 | 0.98-2.04       | 0.063   | 4.5                 | 0.87 (0.25)     | 6.9x10-4 | 0.40 (0.23)     | 0.09     |
| 5.5                 | 1.64 | 1.07-2.52       | 0.02     | 1.67 | 1.17-2.37       | 0.004   | 5.5                 | 0.73 (0.27)     | 7.4x10-3 | 0.48 (0.22)     | 3.4x10-3 |
| Asthma              |      |                 |          |      |                 |         | Asthma              |                 |          |                 |          |
| 1.5                 | 1.98 | 1.29-3.03       | 1.8x10-3 | 1.46 | 0.69-3.19       | 0.34    | 1.5                 | 0.66 (0.31)     | 0.03     | 0.30 (0.44)     | 0.48     |
| 2.5                 | 2.30 | 1.49-3.55       | 1.6x10-4 | 1.15 | 0.63-2.09       | 0.65    | 2.5                 | 0.78 (0.30)     | 0.01     | 0.26 (0.36)     | 0.48     |
| 3.5                 | 2.33 | 1.50-3.61       | 1.5x10-4 | 1.50 | 0.90-2.50       | 0.12    | 3.5                 | 0.82 (0.30)     | 6.2x10-3 | 0.43 (0.31)     | 0.17     |
| 4.5                 | 2.30 | 1.48-3.59       | 2.4x10-4 | 1.76 | 1.11-2.80       | 0.017   | 4.5                 | 0.81 (0.29)     | 5.8x10-3 | 0.56 (0.28)     | 0.049    |
| 5.5                 | 1.98 | 1.22-3.22       | 0.006    | 2.06 | 1.33-3.18       | 0.0011  | 5.5                 | 0.72 (0.31)     | 0.02     | 0.62 (0.27)     | 0.02     |
| Atopic Dermatitis   |      |                 |          |      |                 |         | Atopic Dermatitis   |                 |          |                 |          |
| 1.5                 | 2.05 | 1.18-3.56       | 0.01     | 0.91 | 0.42-1.97       | 0.80    | 1.5                 | 0.80 (0.37)     | 0.03     | 0.72 (0.46)     | 0.12     |
| 2.5                 | 2.49 | 1.36-4.57       | 3.1x10-3 | 0.82 | 0.44-1.53       | 0.53    | 2.5                 | 0.77 (0.38)     | 0.044    | 0.52 (0.39)     | 0.19     |
| 3.5                 | 3.15 | 1.56-6.33       | 1.3x10-3 | 0.84 | 0.49-1.46       | 0.54    | 3.5                 | 0.99 (0.40)     | 0.014    | 0.28 (0.35)     | 0.42     |
| 4.5                 | 3.79 | 1.61-8.92       | 2.3x10-3 | 0.94 | 0.57-1.57       | 0.82    | 4.5                 | 0.98 (0.47)     | 0.036    | 0.29 (0.32)     | 0.37     |
| 5.5                 | 1.33 | 0.47-3.77       | 0.59     | 1.19 | 0.73-1.96       | 0.49    | 5.5                 | 0.26 (0.61)     | 0.67     | 0.38 (0.31)     | 0.22     |
| Rhinoconjunctivitis |      |                 |          |      |                 |         | Rhinoconjunctivitis |                 |          |                 |          |
| 1.5                 | 1.04 | 0.66-1.62       | 0.88     | 1.01 | 0.51-2.01       | 0.98    | 1.5                 | 0.36 (0.32)     | 0.27     | 0.18 (0.41)     | 0.66     |
| 2.5                 | 1.01 | 0.64-1.61       | 0.96     | 0.96 | 0.55-1.68       | 0.89    | 2.5                 | 0.28 (0.33)     | 0.40     | 0.25 (0.35)     | 0.48     |
| 3.5                 | 0.95 | 0.60-1.52       | 0.83     | 1.05 | 0.64-1.72       | 0.85    | 3.5                 | 0.31 (0.32)     | 0.33     | 0.19 (0.31)     | 0.54     |
| 4.5                 | 0.87 | 0.54-1.42       | 0.59     | 1.06 | 0.68-1.66       | 0.79    | 4.5                 | 0.20 (0.32)     | 0.53     | 0.22 (0.28)     | 0.44     |
| 5.5                 | 0.81 | 0.48-1.36       | 0.43     | 1.07 | 0.70-1.64       | 0.74    | 5.5                 | 0.10 (0.33)     | 0.75     | 0.23 (0.27)     | 0.39     |

**Table S4 Frequency of non-malaria episodes (number of days of presence divided by number of non-malaria episodes) according to allergic status and age group.** The *P* value is that from the GLMM analyses of the effect of allergic status by age group on the number of non-malaria episodes per person-trimester.

| Allergic condition  | Allergic status<br>(No/Yes) | Age group (years) |       | <i>P</i> value |
|---------------------|-----------------------------|-------------------|-------|----------------|
|                     |                             | <3·5              | >3·5  |                |
| Atopy               | N                           | 78·2              | 85·9  | 0·105          |
|                     | Y                           | 87·2              | 102·6 |                |
| Asthma              | N                           | 79·6              | 87·3  | 0·319          |
|                     | Y                           | 82·5              | 100·2 |                |
| Atopic dermatitis   | N                           | 80·9              | 88·2  | 0·323          |
|                     | Y                           | 73·4              | 101·9 |                |
| Rhinoconjunctivitis | N                           | 77·9              | 88·3  | 0·167          |
|                     | Y                           | 94·9              | 91·8  |                |

Figure S1. Incidence of clinical cases per 100 person-trimesters in children under 15 years of age.



Figure S2. Cumulative incidence of clinical cases according to allergy class predicted by the statistical model.



1  
2  
3  
4  
5  
6  
7  
8  
9  
10  
11  
12  
13  
14  
15  
16  
17  
18  
19  
20  
21  
22  
23  
24  
25  
26  
27  
28  
29  
30  
31  
32  
33  
34  
35  
36  
37  
38  
39  
40  
41  
42  
43  
44  
45  
46  
47  
48  
49

**Figure S3. Graphical control model for parasite density**

These figures provide a graphical checking of model goodness of fit. Figure A is the scatter plot of the natural logarithm of the observed parasite density and is compared to Figure B, which is the scatter plot of the natural logarithm of the predicted parasite density by the model; on both figures A and B the y-axes give the values for the log of the parasite density. Figure C shows the distribution of the residuals with the predicted values and Figure D is the histogram of the residuals; both figures C and D show the residuals normally distributed around zero.



### Analysis using box-cox transformation and probit normalization

The model we fitted on the parasite density ("*pf\_density*") has used as outcome variable the natural logarithm of *pf\_density* (equivalent to a Box-Cox for which the parameter is null). As shown on Figure S4 the distribution of  $\log(pf\_density)$  is not perfectly normal, it is left-skewed.

**Figure S4. Histogram of *pf\_density* and  $\log(pf\_density)$**



We add here the case for a Box-Cox transformation of the parasite density where the parameter is  $\lambda = 0.3$ , this parameter value was obtained as optimal using the R- function named "boxcox" from the "MASS" library. Then the Box-Cox transformation of the parasite density is  $y = (pf\_density^{0.3} - 1)/0.3$  having the distribution shown on Figure S5 below.

Figure S5. Histogram of the Box-Cox transformation of pf\_density using a  $\lambda$  parameter of 0.3

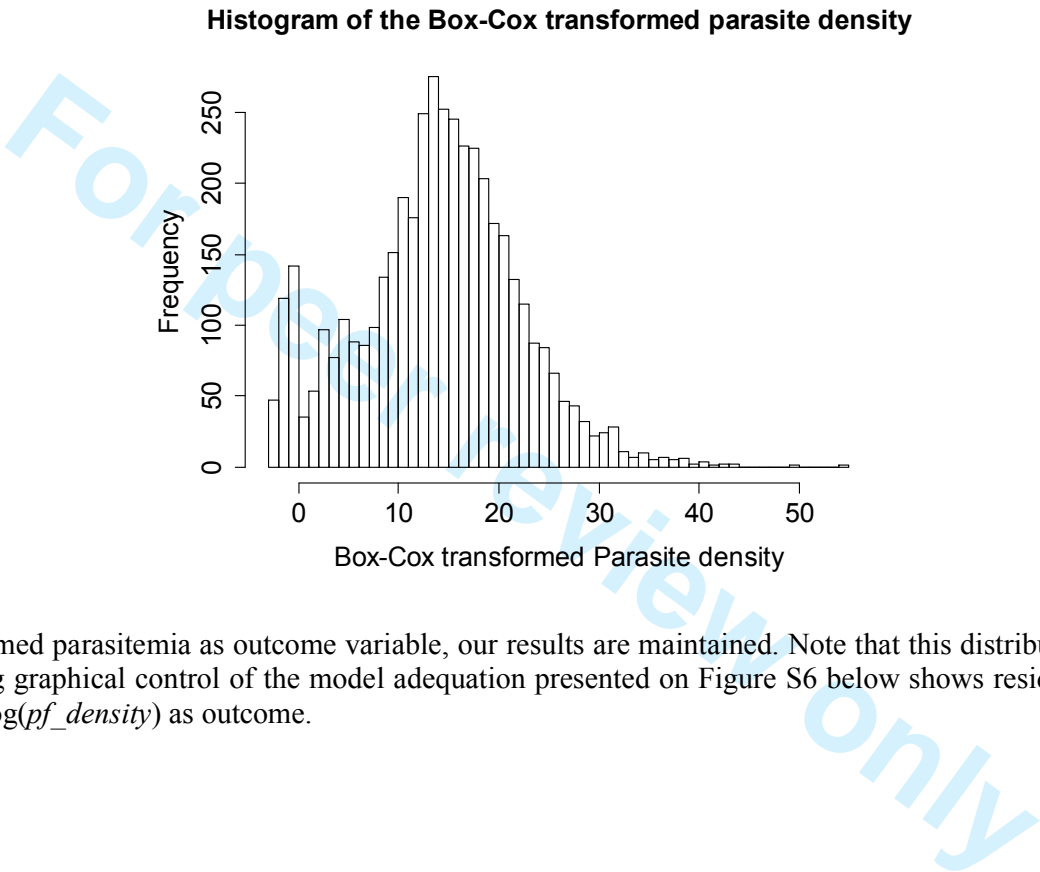

With this Box-Cox transformed parasitemia as outcome variable, our results are maintained. Note that this distribution is not "perfectly" normal. However, the corresponding graphical control of the model adequation presented on Figure S6 below shows residuals more close to the normal distribution than those for  $\log(pf\_density)$  as outcome.

Figure S6. Graphical control of the model adequation for  $y = \text{Box-Cox}(pf\_density, \lambda = 0.3)$



Although using a mixed model approach based on an extreme value distribution would provide a more robust validation of these results, the method we used incorporating pedigree information was developed through an R-package known as "pedigreemm" that allows just for a limited number of distribution laws, which do not include extreme value distributions like the Gumbel or Weibull distributions.

However, we tried the Probit normalization on the  $\log(pf\_density)$  to readjust its quantiles to those from a standard normal, and subsequently used the derived standard normal transformation of the  $\log(pf\_density)$  as outcome (see Figure S7 below, the three graphs presented in the first row of the graphs panel concern the  $\log(pf\_density)$  before Probit normalization and the three in the second row are for after Probit normalization. We can see on the histogram in blue color a good normal distribution of the  $y$  variable.

Figure S7. Probit normalization of the  $\log(pf\_density)$

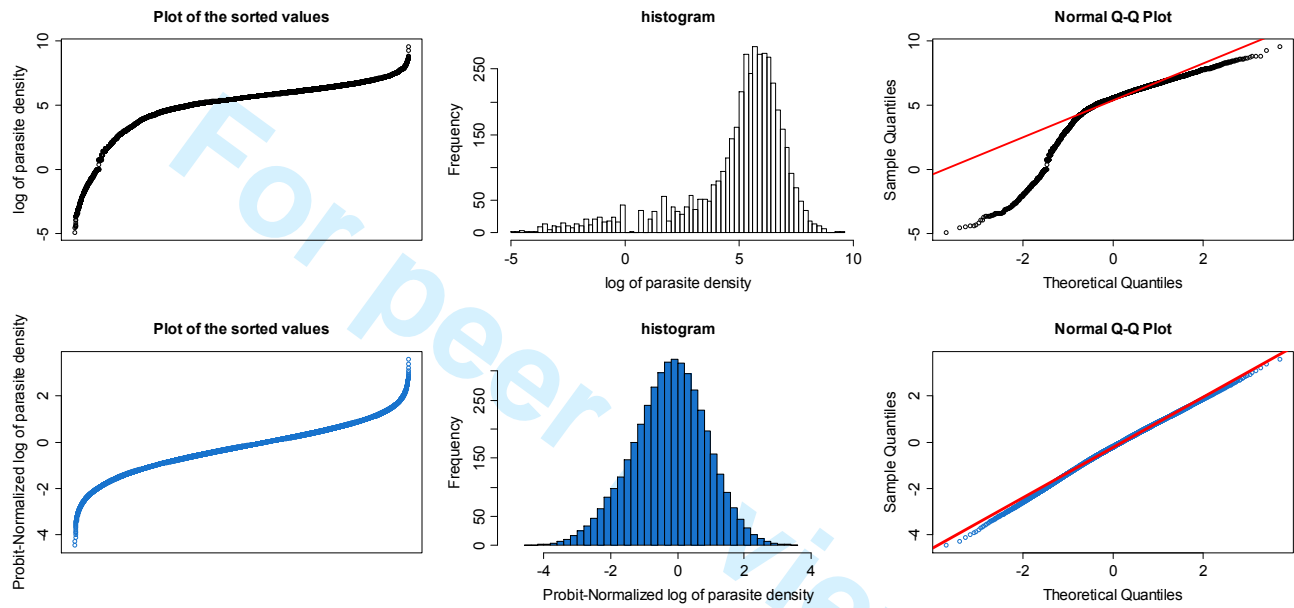

The results we obtained after this Probit normalization of the  $\log(pf\_density)$  confirmed the same findings. Also, the corresponding graphical control of the model adequation presented on Figure S8 below, shows a good normal distribution of residuals from this model.

Figure S8. Graphical control of the model adequation after Probit normalization of the  $\log(pf\_density)$

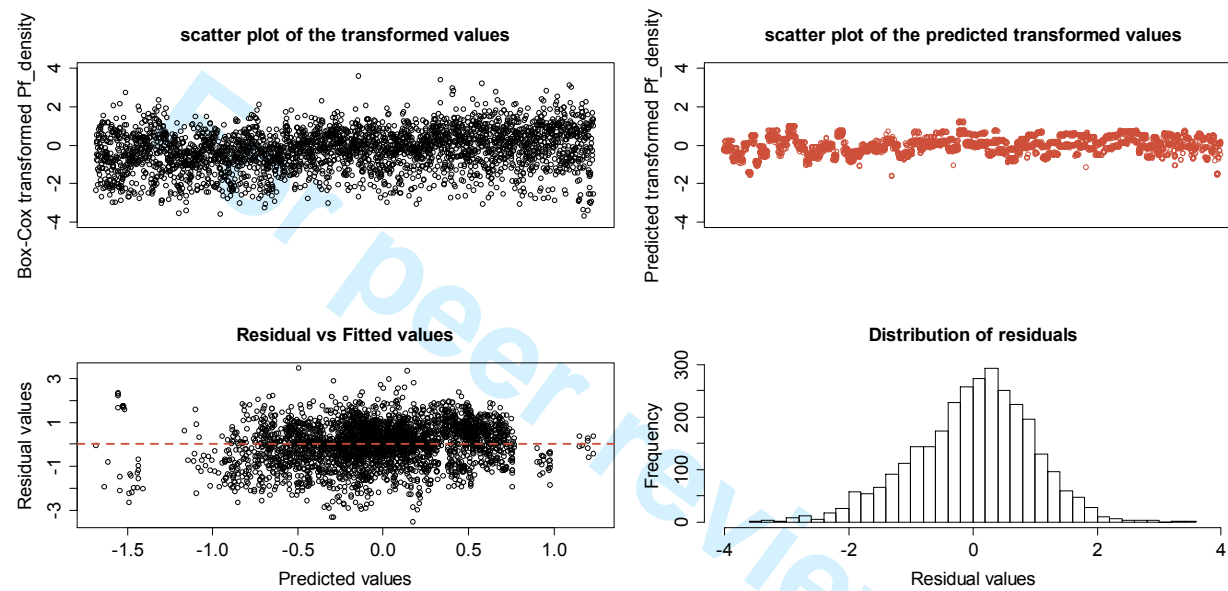

1  
2  
3  
4  
5  
6  
7  
8  
9  
10  
11  
12  
13  
14  
15  
16  
17  
18  
19  
20  
21  
22  
23  
24  
25  
26  
27  
28  
29  
30  
31  
32  
33  
34  
35  
36  
37  
38  
39  
40  
41  
42  
43  
44  
45  
46  
47  
48  
49  
50  
51  
52  
53  
54  
55  
56  
57  
58  
59  
60

**Asthma and atopic dermatitis are associated with increased risk of clinical *Plasmodium falciparum* malaria**

Magali Herrant<sup>1,2</sup> *scientist*, Cheikh Loucoubar<sup>1,2,3,4</sup> *scientist*, Hubert Bassène<sup>5</sup> *scientist*, Bronner Gonçalves<sup>2</sup> MD, Sabah Boufkhed<sup>2</sup> *scientist*, Fatoumata Diene Sarr<sup>2</sup> MD, Arnaud Fontanet<sup>6,7</sup> MD, Adama Tall<sup>2</sup> *scientist*, Laurence Baril<sup>2</sup> MD, Odile Mercereau-Puijalon<sup>8</sup> *scientist*, Salaheddine Mécheri<sup>9</sup> *scientist*, Anavaj Sakuntabhai<sup>1,10</sup> *scientist*, Richard Paul<sup>1</sup> *scientist*

<sup>1</sup> Institut Pasteur, Unité de la Génétique Fonctionnelle des Maladies Infectieuses, CNRS URA3012, 28 rue du Docteur Roux, F-75724, Paris cedex 15, France.

<sup>2</sup> Institut Pasteur de Dakar, Unité d'Epidémiologie des Maladies Infectieuses, Dakar, Senegal.

<sup>3</sup> INSERM, U946, Genetic Variation and Human Diseases Unit, F-75010, Paris, France.

<sup>4</sup> Université Paris Diderot, Sorbonne Paris Cité, Institut Universitaire d'Hématologie, F-75010, Paris, France.

<sup>5</sup> Institut de Recherche pour le Développement (IRD), Unité de Recherche sur les Maladies Infectieuses et Tropicales Emergentes, URMITE CNRS-IRD 198 UMR 6236, Dakar, Sénégal

<sup>6</sup> Institut Pasteur, Unité d'Epidémiologie des Maladies Emergentes, 25 rue du Docteur Roux, F-75724, Paris cedex 15, France.

<sup>7</sup> Conservatoire National des Arts et Métiers, 292 rue Saint Martin, Paris 75003, France

<sup>8</sup> Institut Pasteur, Unité d'Immunologie Moléculaire des Parasites, CNRS URA2581, Paris, France.

<sup>9</sup> Institut Pasteur, Unité de Biologie des Interactions Hôte Parasite, 25 rue du Docteur Roux, F-75724, Paris cedex 15, France.

<sup>10</sup> Complex Systems group, Faculty of Science, Mahidol University, Bangkok, Thailand.

**Correspondance to:** Richard Paul, Institut Pasteur, Unité de la Génétique Fonctionnelle des Maladies Infectieuses, 28 rue du Docteur Roux, 75724 Paris cedex 15, France. richard.paul@pasteur.fr

## Article summary

### Article focus

- Genetic studies suggest a link between susceptibility to allergy and malaria in Africa
- We hypothesize that atopy increases susceptibility to malaria

### Key messages

- Results demonstrate an association between asthma, atopic dermatitis and susceptibility to clinical *P. falciparum* episodes.
- Genetic pre-disposition to asthma or atopic dermatitis impairs the acquisition of clinical immunity to malaria.
- Administration of anti-histamines to atopic children will likely reduce the burden of clinical malaria in these children, increase the efficacy of first-line treatment anti-malarials and alleviate the non-infectious consequences of atopy.

### Strengths and limitations

The major strength of this study is the complete knowledge of the number of clinical *P. falciparum* malaria episodes each individual has had since birth and the exposure level per trimester over the 15 years covering the birth cohort. No other study has such detailed information for such a length of time. The major weakness of the study is the relatively small sample size, which would have reduced power to detect an association.

1  
2  
3  
4  
5  
6  
7  
8  
9  
10  
11  
12  
13  
14  
15  
16  
17  
18  
19  
20  
21  
22  
23  
24  
25  
26  
27  
28  
29  
30  
31  
32  
33  
34  
35  
36  
37  
38  
39  
40  
41  
42  
43  
44  
45  
46  
47  
48  
49  
50  
51  
52  
53  
54  
55  
56  
57  
58  
59  
60

**Abstract**

**Objectives:** To assess the impact of atopy and allergy on the risk of clinical malaria.

**Design:** A clinical and immunological allergy cross-sectional survey in a birth cohort of 175 children from 1 month to 14 years of age followed for up to 15 years in a longitudinal open cohort study of malaria in Senegal. Malaria incidence data were available for 143 of these children (aged 4 months to 14 years of age) for up to 15 years. Mixed model regression analysis was used to determine the impact of allergy status on malaria incidence, adjusting for age, gender, sickle cell trait and force of infection.

**Main outcome measures:** Asthma, allergic rhinoconjunctivitis and atopic dermatitis status, the number of clinical *Plasmodium falciparum* malaria episodes since birth and associated parasite density.

**Results:** Twelve percent of the children were classified as asthmatic and ten percent as having atopic dermatitis. These groups had respectively a two-fold (OR 2.12 95% confidence intervals 1.46 to 3.08;  $P=8 \times 10^{-5}$ ) and three-fold (OR 3.15, 1.56 to 6.33;  $P=1.3 \times 10^{-3}$ ) increase in the risk of clinical *P. falciparum* malaria once older than the age of peak incidence of clinical malaria (3 to 4 years of age). They also presented with higher *P. falciparum* parasite densities (Asthma: mean 105.3 parasites/ $\mu$ L  $\pm$ SE 41.0 vs. 51.3  $\pm$ 9.7;  $P=6.2 \times 10^{-3}$ ; Atopic dermatitis: 135.4  $\pm$ 70.7 vs. 52.3  $\pm$ 11.0;  $P=0.014$ ). There was no effect of allergy on the number of non-malaria clinical presentations. Individuals with allergic rhinoconjunctivitis did not have an increased risk of clinical malaria nor any difference in parasite densities.

**Conclusion:** These results demonstrate that asthma and atopic dermatitis delay the development of clinical immunity to *P. falciparum*. Despite the encouraging decrease in malaria incidence rates in Africa, a significant concern is the extent to which the increase in allergy will exacerbate the burden of malaria. Given the demonstrated anti-parasitic effect of anti-histamines, administration to atopic children will likely reduce the burden of clinical malaria in these children, increase the efficacy of first-line treatment anti-malarials and alleviate the non-infectious consequences of atopy.

## Introduction

The World Allergy Organization estimates that 40% of the world's population is concerned by allergic diseases.<sup>1</sup> In developing countries where *Plasmodium falciparum* malaria is endemic, prevalence of allergy is significantly lower, but is on the increase.<sup>2</sup> T helper type 2 (Th2) cells, their related cytokines, IgE, eosinophils and mast cells play a major role in allergic inflammation. Orientation of the immune response towards a Th1 profile is crucial for immunity to intracellular pathogens,<sup>3</sup> whereas orientation towards a Th2 profile drives immunity to extracellular pathogens and antigens resulting in class switching giving rise to IgE-producing B cells.<sup>4</sup> ~~An important~~ role of the Th1/Th2 balance in the development of clinical malaria following infection by *P. falciparum* has been suggested by numerous studies.<sup>5-7</sup> Whilst it is recognised that acquired anti-parasite immunity is IgG dependent,<sup>8</sup> it has been suggested that the Th2 bias induced by *P. falciparum* may exacerbate allergy parasite-specific IgE also impact upon the clinical outcome of infection.<sup>8</sup> For example, higher IgE but not IgG levels have been observed in patients with cerebral malaria than those with uncomplicated *P. falciparum* infection.<sup>9</sup> The role of IgE, however, remains unclear.<sup>10</sup> Likewise, an atopic state may generate a tendency to develop a Th2-type immune response to *P. falciparum*.

~~However,~~ the interplay between infectious agents and allergy is unclear/ambiguous. On the one hand, for example, severe respiratory syncytial virus infection in infants increased the risk of allergic rhinoconjunctivitis and allergic asthma.<sup>119,120</sup> On the other hand, measles,<sup>134</sup> hepatitis A<sup>142</sup> and tuberculosis<sup>153</sup> seemingly reduce atopy. Although, an atopic condition can increase incidence of disease, such as the case for the skin commensal *Staphylococcus aureus* in patients with atopic dermatitis,<sup>164</sup> an atopic tendency *per se* does not generally lead to increased illness from infectious agents.

Genome wide studies have identified chromosomal regions linked to clinical malaria, all of which overlap with those previously identified to be involved in atopic dermatitis, asthma, atopy and IgE levels,<sup>175-197</sup> suggesting that common mechanisms may be involved in both pathologies.<sup>2048</sup> Chromosomal region 5q31 that has been repeatedly shown to be associated with control of parasite density and contains a cluster of cytokines, among which IL12B has been previously associated with psoriasis.<sup>2149</sup> The other regions, 13q13-q22, 5p15-p13 and 12q21-q23, contain genes involved in innate immunity, notably the interleukin 7 receptor,

1  
2  
3  
4  
5  
6  
7  
8  
9  
10  
11  
12  
13  
14  
15  
16  
17  
18  
19  
20  
21  
22  
23  
24  
25  
26  
27  
28  
29  
30  
31  
32  
33  
34  
35  
36  
37  
38  
39  
40  
41  
42  
43  
44  
45  
46  
47  
48  
49  
50  
51  
52  
53  
54  
55  
56  
57  
58  
59  
60

and several involved in tumour necrosis factor synthesis [C1q and tumour necrosis factor related protein 3 (C1QTNF3)] and a gene involved in the complement system (C9).<sup>2018</sup>

Several additional lines of evidence support the concept that susceptibility to malaria and atopy may be related to similar immunological defects. In Ethiopia, a history of malaria was associated with atopy.<sup>229</sup> A mouse model for human atopic disease was found to be very susceptible to murine malaria and a major locus for atopic disease mapped close to the region controlling parasite density.<sup>231</sup> This region contains several candidate genes that have effects on T-cell function.<sup>231</sup>

Moreover, a direct effect of histamine in the malaria pathogenesis has been found using genetic and pharmacological approaches<sup>242</sup> and increased levels of histamine are associated with the severity of disease in humans infected with *P. falciparum* and in animal malaria models.<sup>253,264</sup>

To test the hypothesis that allergy impacts upon clinical *P. falciparum* malaria, we performed a clinical allergy cross-sectional study in the family-based longitudinal cohort from Senegal previously used for the genome linkage study<sup>2018</sup> and analysed the impact of asthma, atopic dermatitis, allergic rhinoconjunctivitis on the incidence of clinical *P. falciparum* episodes and the maximum parasite density during each episode.

Methods

Population and outcome data

The malaria research program conducted in Dielmo village in Senegal has been ongoing since 1990 as described elsewhere.<sup>275</sup> In brief, between 1990 and 2008, a longitudinal study involving the inhabitants of the village of Dielmo, Senegal, was carried out to identify all episodes of fever. The study design included daily medical surveillance with systematic blood testing of individuals with fever and examination of 200 oil-immersion fields on a thick blood film for malaria parasites (about 0.5 µL of blood). Each individual was given a unique identification code and details of family ties, occupation, and precise place of residence were recorded on detailed maps of each household with the location of each bedroom. All households were visited daily, absenteeism recorded, and the presence of fever or other

symptoms assessed. We systematically recorded body temperature at home three times a week (every second day) in children younger than 5 years, and in older children and adults in cases of suspected fever or fever-related symptoms. In cases of fever or other symptoms, blood testing was done at the dispensary by finger prick, and we provided detailed medical examination and specific treatment. Parasitologically confirmed clinical malaria episodes were treated according to national guidelines. From 1990 to 2008, four different drug regimens were implemented: Quinine from 1990 to 1994, Chloroquine from 1995 to 2003, Fansidar (sulfadoxine-pyrimethamine) from 2004 to mid-2006 and Artemisinin-based combination therapy (ACT; Amodiaquine- sulfadoxine-pyrimethamine) from mid-2006 to 2008.

Parasite positivity was established as follows. Thick blood films were prepared and stained by 3% Giemsa stain. Blood films were examined under an oil immersion objective at x1000 magnification by the trained laboratory technicians and 200 thick film fields were examined to count the number of asexual and gametocyte parasite stages. Asexual parasite densities (per  $\mu\text{L}$ ) were calculated by establishing the ratio of parasites to white blood cells and then multiplying the parasite count by 8,000, the average white blood cell count per  $\mu\text{L}$  of blood.

Malaria transmission in Dielmo is intense and perennial. We conducted a cross-sectional survey to estimate the prevalence of symptoms related to allergic diseases among 175 children aged from 1 month to 14 years old who were born during the malaria research program.

Both the longitudinal and cross-sectional surveys were approved by the Ministry of Health of Senegal. Informed consent of the volunteers is renewed every year. More specifically for the cross-sectional survey, after informing about the procedures and the purpose of the study, written informed consent was obtained from parents or guardians of children either by signature or by thumbprint on a voluntary consent form written in both French and Wolof, the main local language. Consent was obtained in the presence of the school director, an independent witness.

The family structure (pedigree) was available after a demographic census performed for every volunteer at his adhesion in the project. A verbal interview of mothers or key representatives of the household was used to obtain information on genetic relationships between studied individuals, their children, their parents, and to identify genetic links

1  
2  
3  
4  
5  
6  
7  
8  
9  
10  
11  
12  
13  
14  
15  
16  
17  
18  
19  
20  
21  
22  
23  
24  
25  
26  
27  
28  
29  
30  
31  
32  
33  
34  
35  
36  
37  
38  
39  
40  
41  
42  
43  
44  
45  
46  
47  
48  
49  
50  
51  
52  
53  
54  
55  
56  
57  
58  
59  
60

among the population. The total pedigree comprised 828 individuals, including absent or dead relatives, composed of ten independent families that can be sub-divided into 206 nuclear families (father – mother couples with at least one child) with an average of 3.6 children each. Genetically related nuclear families occur because of multiple marriages and marriages among related individuals. Previous typing with microsatellites has enabled the construction of a pedigree based on Identity-by-Descent using MERLIN.<sup>2048,286</sup> The mean coefficient of inbreeding is 0.0008. Newborns since this original genetic analysis were added to the family of the parents in question. The 143 children, with both allergy and malaria data, belonged to 61 nuclear families and comprised 30 singletons, 102 siblings and 11 half-sibs (yielding 55 half-sib pairs). The mean genetic relatedness (by pedigree) of the 143 children is 0.0114 (range: 0.0013 to 0.022).

*P. falciparum clinical episodes*

*P. falciparum* malaria clinical episode phenotypes analysed were: (i) clinical *P. falciparum* infections treated with anti-malarial therapy and (ii) the highest parasite density during the *P. falciparum* clinical episode. A clinical *P. falciparum* episode was defined as a clinical presentation with fever (axillary temperature  $\geq 37.5^{\circ}\text{C}$ ) and/or other clinical signs suggestive of malaria associated with a thick blood smear positive for *P. falciparum* and that was treated with anti-malarial therapy. Repeated clinical malaria presentations within 15 consecutive days were not considered to be independent and were excluded from the analyses, unless there was a negative thick blood smear between two clinical presentations. We also excluded observations in any trimester for which the individual was not present for at least one third of the time.

We calculated the quarterly incidence rate of clinical *P. falciparum* episodes in children below the age of 15 years as the ratio of the total number of clinical *P. falciparum* episodes during the trimester divided by the total number of person-trimesters surveyed. Incidence rate is expressed as cases per 100 person-trimesters (see Supplementary Figure S1). This rate was used in the analysis to approximate the force of infection (exposure level) within the targeted population at the time of a given clinical *P. falciparum* episode.

The total number of clinical presentations per trimester that were not attributable to *P. falciparum* was tabulated. Repeated non-malaria presentations within seven consecutive days were not considered to be independent and were excluded.

### *Allergic diseases and atopic status*

The International Study of Asthma and Allergies in Childhood (ISAAC) diagnostic criteria have been shown to be reproducible, adequate and able to discriminate children with allergic diseases in different areas of the world.<sup>2</sup> The standardized ISAAC questionnaire originally written in English was translated into French in compliance with ISAAC guidelines<sup>297</sup>, adapting it to the usual local customs following advice from local clinicians and paediatric allergologists (Acknowledgements and Technical Appendix). The adequacy and reliability of the translated questionnaire had been previously confirmed by a pilot study on 30 randomly selected children in the same community. The questionnaire was completed by specially trained health workers during an oral interview conducted in Wolof with children and their mothers or guardians.

To assess the prevalence of allergic diseases in children, we used the positive and negative predictive values of the ISAAC questionnaire diagnosis criteria developed for subtropical countries.<sup>3028</sup> Each question was scored according to the medical diagnosis of paediatricians and paediatric allergologists. Positive or negative answers were thus graded on the basis of symptom sensitivity, specificity, frequency, location or early onset. For each allergic disease, three categories of symptom severity, *severe*, *moderate*, and *none*, were defined as follows:

*Asthma* – *severe* symptoms if the child had “wheezing or whistling in the chest before the age of two years” and “more than three times” or severe enough to “limit his/her speech”; *moderate* symptoms if the child had “wheezing or whistling in the chest before the age of two years” and “in the past 12 months”; and *none* otherwise.

*Allergic rhinoconjunctivitis* – *severe* symptoms if the child had “sneezing, runny or stuffy nose in the past 12 months” and “more than five times a year”, and “itchy, watery eyes or tropical endemic limboconjunctivitis (TELC) in the past 12 months”; *moderate* symptoms if the child had “sneezing, runny or stuffy nose in the past 12 months”, and “itchy, watery eyes or TELC in the past 12 months”; and *none* otherwise.

*Atopic dermatitis* – *severe* symptoms if the child had “scaly or exudating, crusted and pruritic patches in the past 12 months” and “affecting any of the following characteristic areas: face, around the ears or eyes, folds of armpits or elbows or groin, behind the knees, under the buttocks”, and “onset of symptoms before the age of two years”; *moderate* symptoms if the

1  
2  
3  
4  
5  
6  
7  
8  
9  
10  
11  
12  
13  
14  
15  
16  
17  
18  
19  
20  
21  
22  
23  
24  
25  
26  
27  
28  
29  
30  
31  
32  
33  
34  
35  
36  
37  
38  
39  
40  
41  
42  
43  
44  
45  
46  
47  
48  
49  
50  
51  
52  
53  
54  
55  
56  
57  
58  
59  
60

child had “scaly or exudating, crusted and pruritic patches in the past 12 months” and “affecting any of characteristic areas (see above)”, and “onset of symptoms before the age of four years”; and *none* otherwise.

The inter-relationships between variables reflecting the severity of symptoms of the three allergic diseases were used to identify children at high risk of atopy. The *high probability* group was defined by the prevalence of at least one of any *severe* symptoms or two of any *moderate* symptoms. The *probable* group was defined as those with *moderate* symptoms from one of the three allergic diseases and remaining children were classified in the *unlikely* group.

*Helminths*

Helminthic infections are common in this region and are known to modify the clinical course and outcome of both allergic diseases and malaria.<sup>3129,320</sup> We therefore carried out a helminth survey for 91 individuals present during the cross-sectional survey. Diagnosis was performed by stool examination by microscope and by the Kato technique to search for the presence of *Ascaris lumbricoides*, hookworms (*Ancylostoma duodenale* and *Necator americanus*), whipworm (*Trichuris trichiuria*), *Schistosoma mansoni*, and *Strongyloides stercoralis*. Examination for pinworms (*Enterobius vermicularis*) was performed by the anal scotch-test. An anti-helminthic treatment was proposed for all infested individuals.

*Immunoglobulin E titres*

Specific IgE titres were measured by ELISA as previously described.<sup>331</sup> A panel of allergens of potential pertinence to the three classes of allergy was used: (i) Salivary gland extracts (SGE) of two mosquito species present in the study cohorts, *Aedes aegypti* and *Anopheles gambiae sensu stricto*, and (ii) *P. falciparum* parasite extract were prepared as previously described<sup>31</sup>; (iii) House dust mite spp. *Dermatophagoides farinae* and *Dermatophagoides pteronyssinus*; (iv) a mix of pollen allergens from five ubiquitous gramineae spp. [Cock’s-foot (*Dactylis glomerata*), Timothy grass (*Phleum pratense*), Sweet Vernal grass (*Anthoxanthum odoratum*), Perennial ryegrass (*Lolium perenne*), Kentucky Bluegrass (*Poa pratensis*)] (all from Stallergenes, France).

**Statistical analysis**

Statistical analyses were performed using R version 2.12.0 (The R Foundation for Statistical Computing, Vienna, Austria). To address the effect of allergic status on the risk of clinical *P. falciparum* episodes, we performed Generalized Linear Mixed Models (GLMM) extended to pedigree data using the *pedigreemm* package for R to account for the non-independence of individuals because of family relationships, shared house and for repeated measures from the same individual (Technical Appendix). Correlated individual effects due to familial relationships were taken into account by using the pedigree-based genetic relatedness matrix that contains the genetic covariance among all pairs of individuals in the study cohort and is calculated using the pedigree information.<sup>342</sup> Shared house and repeated measures from the same individual were modelled as random effects. All random effects were assumed to be normally distributed, and conditional on these random effects, the dependent variable had: (i) a Binomial distribution when the studied phenotype was the occurrence of a clinical *P. falciparum* episode treated with anti-malarial therapy during a trimester, (ii) a Gaussian distribution when the studied phenotype was the logarithm of the maximum parasite density during a given clinical *P. falciparum* episode, and (iii) a Poisson distribution when the studied phenotype was the number of non-malaria episodes per trimester. The effects of allergy disease classes on these dependent variables were modelled as fixed effects. Allergy classes were reduced to two levels, *Severe* or *moderate* vs. *none* for analyses of asthma, atopic dermatitis and allergic rhinoconjunctivitis and *high probability* vs. *probable* and *unlikely* for atopic tendency. Co-variables included sickle cell trait<sup>331</sup>, gender, number of days present on site during the trimester, trimestrial incidence of *P. falciparum* and age. Age was initially analysed as a continuous covariate. To assess the age-specific effect of allergy, age was categorised into two levels (<3.5 years of age and ≥3.5 years of age, based on the age of peak clinical incidence) and allergy class was nested within age class. The age threshold was varied from 1.5 years to 5.5 years of age and the data re-analysed to assess at which age there was the strongest effect. The association of allergy classes with IgE levels was analysed by box-cox transforming the data and fitting a GLMM with a normal distribution.

## Results

1  
2  
3  
4  
5  
6  
7  
8  
9  
10  
11  
12  
13  
14  
15  
16  
17  
18  
19  
20  
21  
22  
23  
24  
25  
26  
27  
28  
29  
30  
31  
32  
33  
34  
35  
36  
37  
38  
39  
40  
41  
42  
43  
44  
45  
46  
47  
48  
49  
50  
51  
52  
53  
54  
55  
56  
57  
58  
59  
60

Of the 205 eligible children aged under 15 years involved in the family-based longitudinal study, 175 (85.4 %) participated in the cross-sectional survey to assess the prevalence of related symptoms of allergic diseases. All eligible children present at the time of the survey were included; no explicit refusal to participate was recorded. The study cohort was aged from 1 month to 14 years 11 months. The sex-ratio (male/female) was 0.94.

From 1994 until 2008, 143 of the children participating in the cross-sectional survey were present for at least 31 days in any trimester during the study period generating a total of 3,093 person-trimesters of presence (Supplementary Table S1). There were 2,065 treated *P. falciparum* clinical episodes (per individual: median 11, range 0-47)(Supplementary Table S2). The age peak of incidence of *P. falciparum* episodes occurred at 3 to 4 years of age (Figure 1). There were 1,868 non-malaria episodes (median 12, range 0-37) (Table S2). These non-malaria clinical presentations were associated with headache (38 %), chills (32 %), cough (13 %), vomiting (11 %) and diarrhoea (6 %).

The prevalence of moderate or severe asthma symptoms was respectively 2.3 % and 10.3 % (Table 1). The prevalence of moderate or severe allergic rhinoconjunctivitis symptoms was respectively 6.3 % and 10.3 %. The prevalence of moderate or severe atopic dermatitis symptoms was respectively 6.3 % and 2.9 %. On the basis of symptom severity, an atopic tendency was estimated to be unlikely for 68.0 %, probable for 9.1 % and highly probable for 22.9 % of the 175 children. The frequency of each allergy class in children for whom malaria data were available is shown in Table S1.

The risk of treated clinical *P. falciparum* infections was higher for children with high probability of atopy (OR 1.65, 95% confidence intervals 1.20 to 2.26; P=0.002) (Table 2), after adjusting for age, sickle cell trait and the exposure level. Gender was not found to be significant. Analysing the impact of atopy in children younger and older than the peak age of clinical incidence (3 to 4 years old), revealed that atopy increased the risk of *P. falciparum* episodes in children at an age greater than 3.5 years (OR 2.02, 1.39 to 2.93; P=2x10<sup>-4</sup>), but not in children of age prior to the peak clinical incidence (OR 1.38, 0.92 to 2.08; P=0.124) (Table 2). This increased risk resulted in an ever increasing cumulative number of *P. falciparum* episodes with age beyond that of peak clinical incidence (Figure 2. See supplementary Figure S2 for model predictions for comparison).

Analysis by allergy category revealed that asthma (severe or moderate) increases the risk of *P. falciparum* episodes (OR 2.12, 1.46 to 3.08;  $P=8 \times 10^{-5}$ ) and this again only in children of age greater than 3.5 years old (OR 2.33, 1.50 to 3.61;  $P=1.5 \times 10^{-4}$ ). Atopic dermatitis increased the risk of clinical malaria in children older (OR 3.15, 1.56 to 6.33;  $P=1.3 \times 10^{-3}$ ) but not younger than 3.5 years of age (Table 2). Allergic rhinoconjunctivitis was not associated with increased risk of clinical malaria at any age (Table 2). The impact of atopy, asthma and atopic dermatitis can be clearly seen in the ever-increasing number of cumulative *P. falciparum* episodes beyond the age of the onset of clinical immunity in the population, 3.5 years of age (Figure 2). There is no difference in the number of clinical malaria episodes prior to this age in individuals with or without an allergic condition. Analysis using different age thresholds (from 1.5 to 5.5 years of age) revealed similar OR for thresholds of 2.5, 3.5 and 4.5 years of age. The maximum OR for increased malaria occurred in children older than 4.5 years of age and with atopy or atopic dermatitis, whereas for the asthma group it occurred in children after 3.5 years of age (Supplementary Table S3).

There was no impact of any allergic disease on the number of non-malaria episodes by trimester (Supplementary Table S4).

The impact of atopy, asthma and atopic dermatitis on the maximum *P. falciparum* parasite density during a given clinical malaria episode mirrored that of the risk of *P. falciparum* episodes. Parasite density was significantly higher for children with allergic disease older than 3.5 years of age (Table 3 and supplementary Figure S3 for residuals of the fitted model).

As the log-transformed data were left skewed, we additionally analysed using box-cox transformation and probit normalization of the data. The results were qualitatively the same (Supplementary text and Figures S4-S8). Allergic rhinoconjunctivitis had no impact on the parasite density (Table 3). Analysis using different age thresholds yielded ~~the same pattern~~similar qualitative conclusions as seen with the number of clinical episodes (Table S3).

Individuals with moderate or severe symptoms of atopic dermatitis had significantly higher specific IgE titres against *Ae. aegypti* ( $P=0.004$ ) and *An. gambiae* SGE ( $P<0.001$ ). There were no detectable specific anti-*P. falciparum* IgE. Individuals with moderate or severe symptoms of allergic rhinoconjunctivitis did not have significantly higher IgE titres against the tested graminiae ( $P=0.28$ ), although titres decreased with age ( $P=0.035$ ). There was also no effect of

1  
2  
3  
4  
5  
6  
7  
8  
9  
10  
11  
12  
13  
14  
15  
16  
17  
18  
19  
20  
21  
22  
23  
24  
25  
26  
27  
28  
29  
30  
31  
32  
33  
34  
35  
36  
37  
38  
39  
40  
41  
42  
43  
44  
45  
46  
47  
48  
49  
50  
51  
52  
53  
54  
55  
56  
57  
58  
59  
60

asthma on IgE titres against the house dust mite spp. tested (*D. farinae* P=0.60 & *D. pteronyssinus* P=0.27).

Only five individuals were infested with helminths (two *Ancylostoma*, one *Strongyloides*, one *Trichuris* and one *Enterobius*).

**Discussion**

**Principal findings**

Establishing the allergic status of children up to the age of 15 years old followed for malaria since birth, revealed an association of asthma and atopic dermatitis with susceptibility to clinical *P. falciparum* episodes. Importantly the increase in risk of malaria associated with these allergic conditions occurred after the peak clinical incidence of disease in the population, suggesting that they delay the development of clinical immunity to malaria.

**Strengths and weaknesses of the study**

The major strength of this study is the complete knowledge of the number of clinical *P. falciparum* malaria episodes each individual has had since birth and the exposure level per trimester over the 15 years covering the birth cohort. No other study has such detailed information for such a length of time. The major weakness of the study is the relatively small sample size, which would have reduced power to detect an association. In addition, although allergy diagnosis for children under 2 years of age is not considered reliable, there were only 15 individuals under 2 at the time of the allergy study of the 143 for whom malaria and allergy data were available.

**Meaning of the study**

Under intense malaria transmission, after repeated exposure to the parasite, children develop a clinical immunity<sup>353</sup>, whereby they tolerate elevated parasite densities without showing clinical symptoms. In this cohort, the population mean onset of clinical immunity occurred at 3 to 4 years of age. Although clinical immunity is accompanied by a reduction in parasite density, effective anti-parasite immunity develops much more slowly<sup>364</sup> with individuals achieving a state of premunition, whereby they maintain low-grade parasite densities in an asymptomatic state.<sup>375</sup> We show here that children with clinically defined

asthma or atopic dermatitis ~~had a two to three fold~~have an increased ~~in the~~ risk of presenting with *P. falciparum* malaria episodes requiring treatment once passing the age of peak clinical incidence. They also had higher parasite density during clinical episodes, suggesting a reduced ability to control parasite replication. The observed increase in clinical incidence of malaria in patients with asthma or atopic dermatitis is not likely to be the result of increased frailty of such individuals; these individuals did not come more frequently to the clinic with non-malaria symptoms. Our previous genome linkage study identifying chromosomal regions<sup>2018</sup> associated with malaria that overlap with those previously shown to be linked to asthma/atopy suggests that there may be a shared genetic basis to these pathologies rather than any causative effect of one on the other. This is consistent with the increased susceptibility to malaria of mouse atopic models.<sup>231</sup>

#### Comparison with other studies

A previous study in Ethiopia (East Africa) found that a history of malaria (yes/no) increased risk of atopic dermatitis in 306 cases compared to 426 controls as characterized using the ISAAC questionnaire.<sup>220</sup> The only other epidemiological study that has previously examined the link between malaria and atopy<sup>386</sup> also interpreted the result from the perspective of the impact of malaria on atopy. They examined the re-infection rate with *P. falciparum* over a 5-year period in 91 children that were subsequently classified as atopic or not using skin prick tests (SPT) with house dust mite antigen. Their conclusion was that, as with measles<sup>134</sup> and tuberculosis<sup>153</sup>, malaria infection reduces atopy. However, the study lacked previous infection data since birth of the participating individuals and focussed on atopy as determined by SPT against a single allergen. The case-control study of atopic dermatitis risk factors cited above found no overall association between allergen skin sensitization and atopic dermatitis. We also found no evidence of increased IgE titres against house dust mites in the asthmatic or atopic dermatitis groups or against grass pollen in individuals with allergic rhinoconjunctivitis. Such differences likely reflect the different IgE reactivity profiles due to differences in allergen exposure in Africa.<sup>397</sup> There was no evidence of anti-parasite IgE in this cohort of children. We previously showed that circulating anti-parasite IgE titres were strongly positively correlated with anti-mosquito saliva IgE, but became undetectable following malaria exposure, potentially being bound to effector cells.<sup>331</sup> Only mosquito

1  
2  
3  
4  
5  
6  
7  
8  
9  
10  
11  
12  
13  
14  
15  
16  
17  
18  
19  
20  
21  
22  
23  
24  
25  
26  
27  
28  
29  
30  
31  
32  
33  
34  
35  
36  
37  
38  
39  
40  
41  
42  
43  
44  
45  
46  
47  
48  
49  
50  
51  
52  
53  
54  
55  
56  
57  
58  
59  
60

saliva, a known major local allergen, induced a specific IgE response at significantly higher titres in individuals with atopic dermatitis.

Although the immune effectors of clinical immunity are still poorly defined, there is strong evidence that acquired anti-parasite immunity is IgG-dependent<sup>38</sup> and cytophilic immunoglobulins (IgG1 & IgG3), which are capable of eliminating the parasites by opsonisation and/or by Antibody Dependent Cellular Immunity play an important role in premunition.<sup>375</sup> The higher parasite density during symptomatic episodes observed in the asthma group suggests impaired development of acquired immunity. Impaired acquisition of immunity to malaria in children with asthma or atopic dermatitis may stem from their imbalanced Th1/Th2 response. Indeed, an atopic state may generate a tendency to develop a Th2 type immune response to *P. falciparum*. Dendritic cells that are oriented to a Th2 phenotype are more susceptible to orient the acquired immune response towards a Th2 profile.<sup>4039</sup> Orientation of the immune response towards a Th2 profile by asthma or atopic dermatitis would result in a poor Th1 response (and hence development of protective IgG immunoglobulins), considered to be the dominant arm of the immune response enabling resistance to infectious disease in children.<sup>419</sup>

Many studies have revealed an important role of histamine, a key downstream effector molecule in allergic reaction, in the outcome of a malaria parasite infection.<sup>242-264,421-454</sup> Moreover, reports indicate that components of the innate immune system, including eosinophils, basophils, and mast cells (MCs), could play important roles in the pathogenesis of malaria.<sup>421</sup> Increased levels of histamine in plasma and tissue, derived from basophils and MCs, notably following stimulation by IgE through the high affinity receptor FcεR1, are associated with the severity of disease in humans infected with *P. falciparum* and in animal malaria models.<sup>253,264</sup> Chlorpheniramine, a HR1agonist reversed resistance to chloroquine and amodiaquine both *in vivo* and *in vitro*.<sup>432</sup> Moreover, astemizole, another HR1 agonist, was identified as an anti-malarial agent in a clinical drug library screen.<sup>443</sup> Finally, *P. falciparum* produces translationally controlled tumor protein, which is a homolog of the mammalian histamine-releasing factor that causes histamine release from human basophils.<sup>454</sup>

**Further research**

Our results provide the first birth cohort study addressing the link between malaria and allergic diseases. They contribute to a growing body of evidence that the pathologies are related. ISAAC has revealed a steady but significant increase in prevalence rates of asthma and allergic diseases in Africa. Whilst the majority of studies have focused on large cities, there is increasing urbanization throughout Africa, as well as improved access to primary health care in many areas. A key concern for ISAAC is the extent to which such societal evolution will result in an increase in allergic diseases. Increased urbanization in sub-Saharan Africa is changing the epidemiology of malaria and although resulting in a decrease in risk, will result in more severe clinical malaria in older individuals.<sup>465,476</sup> Moreover, a large consumption of anti-malarial drugs in the urban areas provides substantial drug pressure fostering the selection of drug-resistant parasites. Despite the encouraging recent decrease in malaria incidence rates, even in rural areas, an additional significant concern is the extent to which such an increase in allergy will exacerbate the burden of malaria. Given the demonstrated anti-parasitic effect of anti-histamines<sup>47,48</sup>, administration of anti-histamines to atopic children will likely reduce the burden of clinical malaria in these children, increase the efficacy of first-line treatment anti-malarials<sup>498</sup> and alleviate the non-infectious consequences of atopy. Clinical intervention studies should be envisaged.

Formatted: Superscript

### What is already known on this topic

There are several reports of the beneficial effects of anti-histamines for malaria chemoprophylaxis<sup>242-264,487</sup> as well as our previous work<sup>2018</sup> showing that chromosomal regions associated with malaria are also linked to allergy and atopy.<sup>175-197</sup> There are two epidemiological studies showing opposite effects of malaria on atopy.<sup>229,386</sup>

### What this study adds

Using a longitudinal malaria study birth cohort, we identified an association of asthma and atopic dermatitis with susceptibility to clinical *P. falciparum* episodes. Importantly the increase in risk of malaria associated with these allergic conditions occurred only after the peak clinical incidence of disease in the population, suggesting that they delay the development of clinical immunity to malaria.

1  
2  
3  
4  
5  
6  
7  
8  
9  
10  
11  
12  
13  
14  
15  
16  
17  
18  
19  
20  
21  
22  
23  
24  
25  
26  
27  
28  
29  
30  
31  
32  
33  
34  
35  
36  
37  
38  
39  
40  
41  
42  
43  
44  
45  
46  
47  
48  
49  
50  
51  
52  
53  
54  
55  
56  
57  
58  
59  
60

We are grateful to the villagers of Dielmo for their participation and sustained collaboration in this project as well as the field workers (Abdoulaye Badiane) and the data manager (Joseph Faye) for their contribution to the project and in generating and maintaining the malaria database. We are indebted to Michel Thiakane, a paediatric allergologist, head of the Paediatric Service, Principal hospital, Dakar, Senegal and Marie-Thérèse Guinnepain, dermatologist, Institut Pasteur clinic, Paris, France for aid in elaborating the ISAAC questionnaire and advising on clinical diagnosis of allergy in Senegal. We specially thank the children and parents or guardians who participated in the cross-sectional survey '*Pallergo*'. We thank the International Division of the Institut Pasteur that has given full support to this study.

STROBE: This article has been prepared according to the STROBE checklist guidelines.

Funding: Institut Pasteur de Dakar, Institut Pasteur and Agence Nationale de la Recherche, France (ANR 11- BSV1-027-01). The funding source had no role in study design, data collection, data analysis, data interpretation, or writing of the report. The corresponding author had full access to all the data in the study and had final responsibility for the decision to submit for publication.

Contributors: LB, SM, and RP made substantial contributions to the concept and design of the study. MH, HB, BG, SB, FDS, and AT were involved in acquisition of the data. CL, AF, OMP, AS and RP contributed to the analysis and interpretation of the data. MH, CL, HB, BG, SB, FDS, AF, AT, LB, OMP, SM, AS and RP critically reviewed the report and approved its final version for submission. All authors had full access to all of the data in the study and can take responsibility for the integrity of the data and the accuracy of the data analysis. MH and RP are guarantors.

Competing interests: All authors have completed the ICMJE uniform disclosure form at [www.icmje.org/coi\\_disclosure.pdf](http://www.icmje.org/coi_disclosure.pdf) (available on request from the corresponding author) and declare: no financial relationships with any organisations that might have an interest in the submitted work in the previous three years; no other relationships or activities that could appear to have influenced the submitted work.

Ethical approval: The allergy study was approved by the Senegalese National Ethics committee (2009/N°46). Renewed approval of the longitudinal malaria study was obtained from the same committee (2006/N°969).

Data sharing: The allergy database will be made available on-line. The longitudinal malaria data set will be made available following discussion with the coordinators of the three Institutes that govern the dataset through contact with the corresponding author.

Copyright: The Corresponding Author has the right to grant on behalf of all authors and does grant on behalf of all authors, a worldwide licence to the Publishers and its licensees in perpetuity, in all forms, formats and media (whether known now or created in the future), to i) publish, reproduce, distribute, display and store the Contribution, ii) translate the Contribution into other languages, create adaptations, reprints, include within collections and create summaries, extracts and/or, abstracts of the Contribution, iii) create any other derivative work(s) based on the Contribution, iv) to exploit all subsidiary rights in the Contribution, v) the inclusion of electronic links from the Contribution to third party material where-ever it may be located; and, vi) licence any third party to do any or all of the above.

## References

1. WAO, World Allergy Organization - <http://www.worldallergy.org/index.php>. 2010.
2. Asher MI, Montefort S, Björkstén B, Lai CK, Strachan DP, Weiland SK, et al. Worldwide time trends in the prevalence of symptoms of asthma, allergic rhinoconjunctivitis, and eczema in childhood: ISAAC Phases One and Three repeat multicountry cross-sectional surveys. *Lancet* 2006; 368: 733-43.
3. Mosmann TR, Coffman RL. TH1 and TH2 cells: different patterns of lymphokine secretion lead to different functional properties. *Ann Rev Immunol* 1989; 7: 145-73.
4. Zhu J, Paul WE. CD4 T cells: fates, functions, and faults. *Blood* 2008; 112: 1557-69.
5. Elghazali G, Perlmann H, Rutta AS, Perlmann P, Troye-Blomberg M. Elevated plasma levels of IgE in *Plasmodium falciparum*-primed individuals reflect an increased ratio of IL-4 to interferon-gamma (IFN-gamma)-producing cells. *Clin Exp Immunol* 1997; 109: 84-9.

1  
2  
3  
4  
5  
6  
7  
8  
9  
10  
11  
12  
13  
14  
15  
16  
17  
18  
19  
20  
21  
22  
23  
24  
25  
26  
27  
28  
29  
30  
31  
32  
33  
34  
35  
36  
37  
38  
39  
40  
41  
42  
43  
44  
45  
46  
47  
48  
49  
50  
51  
52  
53  
54  
55  
56  
57  
58  
59  
60

6. Perlmann P, Perlmann H, ElGhazali G, Blomberg MT. IgE and tumor necrosis factor in malaria infection. *Immunol Lett* 1999; 65: 29-33.

7. Tangteerawatana P, Perlmann H, Hayano M, Kalambaheti T, Troye-Blomberg M, Khusmith S. IL4 gene polymorphism and previous malaria experiences manipulate anti-*Plasmodium falciparum* antibody isotype profiles in complicated and uncomplicated malaria. *Malaria J* 2009 ; 8: 286-95.

8. ~~Cohen S, McGregor IA, Carrington S. Gamma-globulin and acquired immunity to human malaria. *Nature* 1961; 192: 733-7.~~ ~~Taylor-Robinson AW. Malaria-specific IgE as a risk factor for cancer and atopy. *Am J Trop Med Hyg* 1998; 59: 181.~~

9. ~~Perlmann H, Helmby H, Hagstedt M, Carlson J, Larsson PH, Troye-Blomberg M, et al. IgE elevation and IgE anti-malarial antibodies in *Plasmodium falciparum* malaria: association of high IgE levels with cerebral malaria. *Clin Exp Immunol* 1994; 97: 284-92.~~

10. ~~Duarte J, Deshpande P, Guiyedi V, Mécheri S, Fesel C, Cazenave PA, et al. Total and functional parasite specific IgE responses in *Plasmodium falciparum*-infected patients exhibiting different clinical status. *Malar J* 2007; 6:1.~~

11. Stein RT, Sherrill D, Morgan WJ, Holberg CJ, Halonen M, Taussig LM et al. Respiratory syncytial virus in early life and risk of wheeze and allergy by age 13 years. *Lancet* 1999; 354: 541-5.

120. Sigurs N, Gustafsson PM, Bjarnason R, Lundberg F, Schmidt S, Sigurbergsson F et al. Severe respiratory syncytial virus bronchiolitis in infancy and asthma and allergy at age 13. *Am J Resp Crit Care Med* 2005; 171: 137-41.

131. Shaheen SO, Aaby P, Hall AJ, Barker DJ, Heyes CB, Shiell AW, et al. Measles and atopy Guinea-Bissau. *Lancet* 1996; 347: 1792-96.

142. McIntire JJ, Umetsu SE, Macaubas C, Hoyte EG, Cinnioğlu C, Cavalli-Sforza LL et al. Immunology: hepatitis A virus link to atopic disease. *Nature* 2003; 425: 576.

153. Shirakawa T, Enomoto T, Shimazu S, Hopkin JM. The inverse association between tuberculin responses and atopic disorder. *Science* 1997; 275: 77-9.

Formatted: French (France)

Formatted: English (U.K.)

- 1  
2  
3  
4  
5  
6  
7 164. Gould HJ, Takhar P, Harries HE, Chevretton E, Sutton BJ. The allergic march from  
8 *Staphylococcus aureus* superantigens to immunoglobulin E. *Chem Immunol Allergy*  
9 2007; 93: 106-36.
- 11 175. Jang N, Stewart G, Jones G. Polymorphisms within the PHF11 gene at chromosome  
12 13q14 are associated with childhood atopic dermatitis. *Genes Immun* 2005; 6: 262-4.
- 15 186. Kurz T, Hoffjan S, Hayes MG, Schneider D, Nicolae R, Heinzmann A, et al. Fine  
16 mapping and positional candidate studies on chromosome 5p13 identify multiple  
17 asthma susceptibility loci. *J Allergy Clin Immunol* 2006; 118: 396-402.
- 20 197. Zhang Y, Leaves NI, Anderson GG, Ponting CP, Broxholme J, Holt R, et al. Positional  
21 cloning of a quantitative trait locus on chromosome 13q14 that influences  
22 immunoglobulin E levels and asthma. *Nat Genet* 2003; 34: 181-6.
- 25 2018. Sakuntabhai A, Ndiaye R, Casademont I, Peerapittayamongkol C, Rogier C, Tortevoe  
26 P, et al. Genetic determination and linkage mapping of *Plasmodium falciparum*  
27 malaria related traits in Senegal. *PLoS ONE* 2008; 3: e2000.
- 30 2119. Cargill M, Schrodli SJ, Chang M, Garcia VE, Brandon R, et al. A large-scale genetic  
31 association study confirms IL12B and leads to the identification of IL23R as psoriasis-  
32 risk genes. *Am J Hum Genet* 2007; 80: 273-90.
- 35 220. Haileamlak A, Dagoye D, Williams H, Venn AJ, Hubbard R, Britton J, et al. Early life risk  
36 factors for atopic dermatitis in Ethiopian children. *J Allergy Clin Immunol* 2005; 115:  
37 370-6.
- 40 231. Kohara Y, Tanabe K, Matsuoka K, Kanda N, Matsuda H, Karasuyama H, et al. A major  
41 determinant quantitative-trait locus responsible for atopic dermatitis-like skin lesions  
42 in NC/Nga mice is located on Chromosome 9. *Immunogenetics* 2001; 53: 15-21.
- 45 242. Beghdadi W, Porcherie A, Schneider BS, Dubayle D, Peronet R, Huerre M, et al.  
46 Inhibition of histamine-mediated signaling confers significant protection against  
47 severe malaria in mouse models of disease. *J Exp Med* 2008; 205: 395-408.
- 50 253. Srichaikul T, Archararit N, Siriasawakul T, Viriyapanich T. Histamine changes in  
51 *Plasmodium falciparum* malaria. *Trans R Soc Trop Med Hyg* 1976; 70: 36-8.

1  
2  
3  
4  
5  
6  
7  
8  
9  
10  
11  
12  
13  
14  
15  
16  
17  
18  
19  
20  
21  
22  
23  
24  
25  
26  
27  
28  
29  
30  
31  
32  
33  
34  
35  
36  
37  
38  
39  
40  
41  
42  
43  
44  
45  
46  
47  
48  
49  
50  
51  
52  
53  
54  
55  
56  
57  
58  
59  
60

264. Bhattacharya U, Roy S, Kar PK, Sarangi B, Lahiri SC. Histamine & kinin system in experimental malaria. *Indian J Med Res* 1988; 88: 558–63.

275. Trape JF, Tall A, Diagne N, Ndiath O, Ly AB, Faye J, et al. Malaria morbidity and pyrethroid resistance after the introduction of insecticide-treated bednets and artemisinin-based combination therapies: a longitudinal study. *Lancet Infect Dis* 2011; 11: 925-32.

286. Abecasis GR, Cherny SS, Cookson WO, Cardon LR. Merlin-- rapid analysis of dense genetic maps using sparse gene flow trees. *Nat Genet* 2001; 30: 97-101.

297. Asher MI, Keil U, Anderson HR, Beasley R, Crane J, Martinez F, et al. International Study of Asthma and Allergies in Childhood (ISAAC): rationale and methods. *Eur Respir J* 1995; 8: 483-91.

3028. Yamada E, Vanna AT, Nasipitz CK, Solé D. International Study of Asthma and Allergies in Childhood (ISAAC): validation of the written questionnaire (eczema component) and prevalence of atopic eczema among Brazilian children. *J Investig Allergol Clin Immunol* 2002; 12: 34-41.

3129. Nacher M. Malaria vaccine trials in a wormy world. *Trends Parasitol* 2001; 17: 563-5

320. Yazdanbakhsh M, Kremsner PG, van Ree R. Allergy, parasites, and the hygiene hypothesis. *Science* 2002; 296: 490-4.

331. Lawaly R, Konate L, Marrama L, Dia I, Diallo D, Diène Sarr F, et al. Impact of mosquito bites on asexual parasite density and gametocyte prevalence in asymptomatic chronic *Plasmodium falciparum* infections and correlation with IgE and IgG titres. *Infection and Immunity* 2012; 80: 2240-6.

342. Machado A, Loucoubar C, Grange L, Bureau JF, Sakuntabhai A, Paul R. Human genetic contribution to the outcome of infection with malaria parasites. In: MALARIA PARASITES, ISBN: 979-953-307-072-7, Okwa O (Ed.), INTECH, Rijeka 2012; 267-292.

353. Doolan DL, Dobaño C, Baird JK. Acquired Immunity to Malaria. *Clin Microbiol Rev* 2009; 22: 13–36.

364. Marsh K, Snow RW. Host-parasite interaction and morbidity in malaria endemic areas. *Philos Trans R Soc London B* 1997; 352: 1385–94.

375. Perignon JL, Druilhe P. Immune mechanisms underlying the premonition against *Plasmodium falciparum* malaria. *Mem Inst Oswaldo Cruz* 1994; 89 Suppl. 2: 51–3.
386. Lell B, Borrmann S, Yazdanbakhsh M, Kremsner PG. Atopy and malaria. *Wien Klin Wochenschr* 2001; 113: 927-9.
397. Westritschnig K, Sibanda E, Thomas W, Auer H, Aspöck H, Pittner G, et al. Analysis of the sensitization profile towards allergens in central Africa. *Clin Exp Allergy* 2003; 33: 22-7.
- ~~38. Cohen S, McGregor IA, Carrington S. Gamma globulin and acquired immunity to human malaria. *Nature* 1961; 192: 733–7.~~
4039. de Jong EC, Vieira PL, Kalinski P, Schuitemaker JH, Tanaka Y, Wierenga EA et al. Microbial compounds selectively induce Th1 cell-promoting or Th2 cell-promoting dendritic cells *in vitro* with diverse Th cell-polarizing signals. *J Immunol* 2002; 168: 1704–9.
410. Baird JK. Age-dependent characteristics of protection versus susceptibility to *Plasmodium falciparum*. *Ann Trop Med Parasitol* 1998; 92: 367–90.
421. Mecheri S. Contribution of allergic inflammatory response to the pathogenesis of malaria disease. *Biochim Biophys Acta* 2011; 1822: 49-56.
432. Sowunmi A, Gbotosho GO, Happi CT, Adedeji AA, Bolaji OM, Fehintola FA, et al. Enhancement of the antimalarial efficacy of amodiaquine by chlorpheniramine *in vivo*. *Mem Inst Oswaldo Cruz* 2007; 102: 417-9.
443. Chong CR, Chen X, Shi L, Liu JO, Sullivan DJ. A clinical drug library screen identifies astemizole as an antimalarial agent. *Nat Chem Biol* 2006; 2: 415-416.
454. MacDonald SM, Bhisutthibhan J, Shapiro TA, Rogerson SJ, Taylor TE, Tembo M, et al. Immune mimicry in malaria: *Plasmodium falciparum* secretes a functional histamine-releasing factor homolog *in vitro* and *in vivo*. *Proc Natl Acad Sci USA* 2001; 98: 10829-32.
465. De Silva PM, Marshall JM. Factors contributing to urban malaria transmission in sub-saharan Africa: a systematic review. *J Trop Med* 2012; doi: 10.1155/2012/819563.

Formatted: Indent: Left: -0.5", Hanging: 0.5"

Formatted: Indent: Left: 0", Hanging: 0.5"

1  
2  
3  
4  
5  
6  
7  
8  
9  
10  
11  
12  
13  
14  
15  
16  
17  
18  
19  
20  
21  
22  
23  
24  
25  
26  
27  
28  
29  
30  
31  
32  
33  
34  
35  
36  
37  
38  
39  
40  
41  
42  
43  
44  
45  
46  
47  
48  
49  
50  
51  
52  
53  
54  
55  
56  
57  
58  
59  
60

476. Bob NS, Diop BM, Renaud F, Marrama L, Durand P, Tall A, et al. Parasite polymorphism and severe malaria in Dakar (Senegal): a West African urban area. *PLoS One* 2010; 5: e9817.

487. Musonda CC, Whitlock GA, Witty MJ, Brun R, Kaiser M. Chloroquine-astemizole hybrids with potent *in vitro* and *in vivo* antiparasmodial activity. *Bioorg Med Chem Lett* 2009; 19: 481-4.

498. Egan TJ, Kaschula CH. Strategies to reverse drug resistance in malaria. *Curr Opin Infect Dis* 2007; 20: 598-604.

**Table 1 Classification of Asthma, Allergic rhinoconjunctivitis, Atopic dermatitis and overall Atopic status according to ISAAC questionnaire in children aged 0-14 from a malaria birth cohort.** N is total number of children examined and n-malaria represents those for whom malaria data were recorded. F is the number of females and M the number of males.

|                                     | N (F/M)     | %     | n-malaria (F/M) |
|-------------------------------------|-------------|-------|-----------------|
| <b>Asthma symptoms</b>              |             |       |                 |
| None                                | 153 (73/80) | 87.43 | 125 (59/66)     |
| Moderate                            | 4 (1/3)     | 2.29  | 4 (1/3)         |
| Severe                              | 18 (6/12)   | 10.29 | 14 (4/10)       |
| <b>Rhinoconjunctivitis symptoms</b> |             |       |                 |
| None                                | 146 (64/82) | 83.43 | 120 (52/68)     |
| Moderate                            | 11 (8/3)    | 6.29  | 9 (6/3)         |
| Severe                              | 18 (6/12)   | 10.29 | 14 (6/8)        |
| <b>Atopic dermatitis symptoms</b>   |             |       |                 |
| None                                | 159 (75/84) | 90.86 | 128 (60/68)     |
| Moderate                            | 11 (1/10)   | 6.29  | 11 (1/10)       |
| Severe                              | 5 (4/1)     | 2.86  | 4 (3/1)         |
| <b>Atopic tendency</b>              |             |       |                 |
| Unlikely                            | 119 (56/63) | 68.00 | 97 (46/51)      |
| Probable                            | 16 (8/8)    | 9.14  | 14 (6/8)        |
| Highly probable                     | 40 (16/24)  | 22.86 | 32 (12/20)      |

1  
2  
3  
4  
5  
6  
7  
8  
9  
10  
11  
12  
13  
14  
15  
16  
17  
18  
19  
20  
21  
22  
23  
24  
25  
26  
27  
28  
29  
30  
31  
32  
33  
34  
35  
36  
37  
38  
39  
40  
41  
42  
43  
44  
45  
46  
47  
48  
49  
50  
51  
52  
53  
54  
55  
56  
57  
58  
59  
60

**Table 2 Impact of allergy status on risk of *P. falciparum* clinical episodes.** Shown are the *P* values and adjusted Odds Ratios with 95% confidence intervals calculated from the mixed model analyses. Values for the covariables Age ( $\geq 3.5$  years of age compared to  $< 3.5$  years of age), Trimestrial incidence of *P. falciparum* clinical episodes and HbAS (beta-globin sickle cell trait; AS compared to AA) are those from the Asthma model analysis. For clarity significant co-variables are shown in bold.

| Age groups $< 3.5$ years |                              | ORa         | 95% Confidence Intervals |             | P value                                 |
|--------------------------|------------------------------|-------------|--------------------------|-------------|-----------------------------------------|
|                          |                              |             | Lower                    | Upper       |                                         |
| Atopy                    | <b>Both</b>                  | <b>1.65</b> | <b>1.20</b>              | <b>2.26</b> | <b><math>2.0 \times 10^{-3}</math></b>  |
|                          | $< 3.5$                      | 1.38        | 0.92                     | 2.08        | 0.124                                   |
|                          | <b><math>\geq 3.5</math></b> | <b>2.02</b> | <b>1.39</b>              | <b>2.93</b> | <b><math>2.1 \times 10^{-4}</math></b>  |
| Asthma                   | <b>Both</b>                  | <b>2.12</b> | <b>1.46</b>              | <b>3.08</b> | <b><math>8.0 \times 10^{-5}</math></b>  |
|                          | $< 3.5$                      | 1.50        | 0.90                     | 2.50        | 0.122                                   |
|                          | <b><math>\geq 3.5</math></b> | <b>2.33</b> | <b>1.50</b>              | <b>3.61</b> | <b><math>1.5 \times 10^{-4}</math></b>  |
| Atopic dermatitis        | Both                         | 1.05        | 0.65                     | 1.70        | 0.842                                   |
|                          | $< 3.5$                      | 0.84        | 0.49                     | 1.46        | 0.539                                   |
|                          | <b><math>\geq 3.5</math></b> | <b>3.15</b> | <b>1.56</b>              | <b>6.33</b> | <b><math>1.3 \times 10^{-3}</math></b>  |
| Rhinoconjunctivitis      | Both                         | 0.96        | 0.65                     | 1.41        | 0.818                                   |
|                          | $< 3.5$                      | 1.05        | 0.64                     | 1.72        | 0.853                                   |
|                          | $\geq 3.5$                   | 0.95        | 0.60                     | 1.52        | 0.834                                   |
| Age $\geq 3.5$           |                              | <b>0.48</b> | <b>0.40</b>              | <b>0.57</b> | <b><math>2.7 \times 10^{-15}</math></b> |
| Trimestrial incidence    |                              | <b>1.01</b> | <b>1.00</b>              | <b>1.01</b> | <b><math>1.8 \times 10^{-6}</math></b>  |
| HbAS                     |                              | <b>0.24</b> | <b>0.12</b>              | <b>0.47</b> | <b><math>3.7 \times 10^{-5}</math></b>  |

**Table 3 Impact of allergy status on the maximum *P. falciparum* parasite density during a clinical malaria episode.** Shown are the back-transformed mean parasite densities per microlitre and standard errors (SEM) estimated from the GLMM analyses after taking into account the other co-variables. Significantly different effects are shown in bold for clarity.

| Allergic condition  | Age groups  | Allergic status<br>(No/Yes) | Mean parasite density | SEM  | P value                     |
|---------------------|-------------|-----------------------------|-----------------------|------|-----------------------------|
| Atopy               | <b>Both</b> | <b>N</b>                    | <b>76.3</b>           | 13.8 | <b>0.0158</b>               |
|                     |             | <b>Y</b>                    | <b>131.0</b>          | 36.4 |                             |
|                     | <3.5        | N                           | 114.3                 | 23.7 | 0.148                       |
|                     |             | Y                           | 171.1                 | 56.0 |                             |
|                     | <b>≥3.5</b> | <b>N</b>                    | <b>48.4</b>           | 9.8  | <b>9.5x10<sup>-4</sup></b>  |
|                     |             | <b>Y</b>                    | <b>114.8</b>          | 37.1 |                             |
| Asthma              | <b>Both</b> | <b>N</b>                    | <b>78.1</b>           | 14.4 | <b>3.8 x10<sup>-3</sup></b> |
|                     |             | <b>Y</b>                    | <b>148.5</b>          | 44.3 |                             |
|                     | <3.5        | N                           | 114.8                 | 24.3 | 0.167                       |
|                     |             | Y                           | 171.9                 | 74.5 |                             |
|                     | <b>≥3.5</b> | <b>N</b>                    | <b>51.3</b>           | 9.7  | <b>6.2 x10<sup>-3</sup></b> |
|                     |             | <b>Y</b>                    | <b>105.3</b>          | 41.0 |                             |
| Atopic dermatitis   | Both        | N                           | 82.6                  | 15.0 | 0.605                       |
|                     |             | Y                           | 93.9                  | 38.9 |                             |
|                     | <3.5        | N                           | 122.6                 | 25.5 | 0.425                       |
|                     |             | Y                           | 133.9                 | 63.5 |                             |
|                     | <b>≥3.5</b> | <b>N</b>                    | <b>52.3</b>           | 11.0 | <b>0.014</b>                |
|                     |             | <b>Y</b>                    | <b>135.4</b>          | 70.7 |                             |
| Rhinoconjunctivitis | Both        | N                           | 81.5                  | 14.8 | 0.570                       |
|                     |             | Y                           | 111.4                 | 39.0 |                             |
|                     | <3.5        | N                           | 118.8                 | 25.1 | 0.537                       |
|                     |             | Y                           | 166.3                 | 69.9 |                             |
|                     | <b>≥3.5</b> | <b>N</b>                    | <b>54.6</b>           | 11.3 | 0.327                       |
|                     |             | <b>Y</b>                    | <b>80.9</b>           | 33.7 |                             |

1  
2  
3  
4  
5  
6  
7  
8  
9  
10  
11  
12  
13  
14  
15  
16  
17  
18  
19  
20  
21  
22  
23  
24  
25  
26  
27  
28  
29  
30  
31  
32  
33  
34  
35  
36  
37  
38  
39  
40  
41  
42  
43  
44  
45  
46  
47  
48  
49  
50  
51  
52  
53  
54  
55  
56  
57  
58  
59  
60

**Figure 1** Annual incidence rate of clinical *P. falciparum* episodes per 100 children (bold line). In order to overcome the fluctuations of the annual incidence rate, we fit second (dotted line), third (dashed line) and fourth (solid line) degree polynomial trend lines to the data (bold line). The corresponding R-squared values are 0.70, 0.91 and 0.99 respectively indicating an accurate fit for third and fourth order polynomials. The inflexion on these two trend lines indicates the onset of acquisition of clinical immunity at approximately 3 to 4 years of age.





1  
2  
3  
4  
5  
6  
7  
8  
9  
10  
11  
12  
13  
14  
15  
16  
17  
18  
19  
20  
21  
22  
23  
24  
25  
26  
27  
28  
29  
30  
31  
32  
33  
34  
35  
36  
37  
38  
39  
40  
41  
42  
43  
44  
45  
46  
47  
48  
49  
50  
51  
52  
53  
54  
55  
56  
57  
58  
59  
60

**Figure 2** Mean cumulative number of *P. falciparum* clinical episodes with age for the (A) Asthma, (B) Rhinoconjunctivitis and (C) Atopic dermatitis classes and overall Atopy class (D) (bold lines) compared to individuals without symptoms of each respective allergy type (thin lines). In all cases moderate and severe classes are combined and compared to individuals without allergy symptoms. Note there are no children older than 11 years of age with Atopic dermatitis.

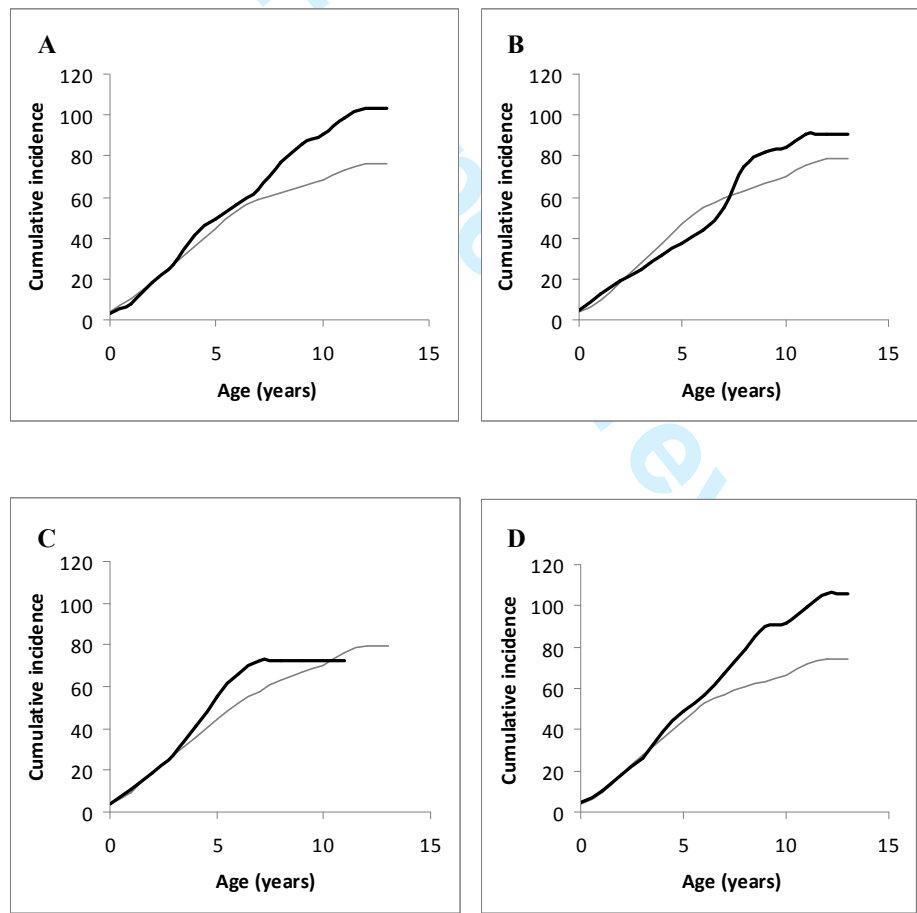

- 1
- 2
- 3
- 4
- 5
- 6
- 7
- 8
- 9
- 10
- 11
- 12
- 13
- 14
- 15
- 16
- 17
- 18
- 19
- 20
- 21
- 22
- 23
- 24
- 25
- 26
- 27
- 28
- 29
- 30
- 31
- 32
- 33
- 34
- 35
- 36
- 37
- 38
- 39
- 40
- 41
- 42
- 43
- 44
- 45
- 46
- 47
- 48
- 49
- 50
- 51
- 52
- 53
- 54
- 55
- 56
- 57
- 58
- 59
- 60

For peer review only - <http://bmjopen.bmj.com/site/about/guidelines.xhtml>

3. Until what age did your child breastfeed **exclusively** without ever taking other aliments (fruits, vegetables, rice, meat, fish, etc.) or liquids (powdered milk, cow or goats milk, fruit juice, water, etc.) ?
- < 6 months ☐\_1 6 – 12 mths ☐\_2 12 – 24 mths ☐\_3 NSP ☐\_9

☐ AGEBREAST

**Illness and vaccination :** Consultation of health records of child

1. Has your child enfant had the following illnesses?

Malaria : ☐\_0 No ☐\_1 Yes ☐\_9 NSP

Tuberculosis treated : ☐\_0 No ☐\_1 Yes ☐\_9 NSP

Helminths (oxyures, ascaris, taenia, etc.) : ☐\_0 No ☐\_1 Yes ☐\_9 NSP

Amoeba : ☐\_0 No ☐\_1 Yes ☐\_9 NSP

Measles : ☐\_0 No ☐\_1 Yes ☐\_9 NSP

☐ MALAR

☐ TUBTRT

☐ HEMINTH

☐ AMOEBA

☐ MEASLES

2. Against what illnesses is you child vaccinated?

Yellow fever : ☐\_0 No ☐\_1 Yes ☐\_9 NSP

Hepatitis B : ☐\_0 No ☐\_1 Yes ☐\_9 NSP

Measles : ☐\_0 No ☐\_1 Yes ☐\_9 NSP

Mumps : ☐\_0 No ☐\_1 Yes ☐\_9 NSP

Rubella : ☐\_0 No ☐\_1 Yes ☐\_9 NSP

Tuberculosis/BCG : ☐\_0 No ☐\_1 Yes ☐\_9 NSP

Diphtheria/Tetanus/Pertussis/Poliomyelitis : ☐\_0 No ☐\_1 Yes ☐\_9 NSP

Typhoid : ☐\_0 No ☐\_1 Yes ☐\_9 NSP

Meningitis : ☐\_0 No ☐\_1 Yes ☐\_9 NSP

Haemophilus influenzae type B (HiB) : ☐\_0 No ☐\_1 Yes ☐\_9 NSP

☐ VACFJ

☐ VACHEPB

☐ VACMEASLE

☐ VACMUMPS

☐ VACRUBEL

☐ VACTUB

☐ VACDTCP

☐ VACTY

☐ VACMENIN

☐ VACHIB

**Habitation :**

1. Which of these animals / insects can be found in the **rooms** where your child lives (today and/or during his first year of life) ?

Dogs in rooms today : ☐\_0 No ☐\_1 Yes ☐\_9 NSP

Dogs in rooms 0-1yr : ☐\_0 No ☐\_1 Yes ☐\_9 NSP

Cats in rooms today : ☐\_0 No ☐\_1 Yes ☐\_9 NSP

Cats in rooms 0-1yr : ☐\_0 No ☐\_1 Yes ☐\_9 NSP

Sheep in rooms today : ☐\_0 No ☐\_1 Yes ☐\_9 NSP

Sheep in rooms 0-1yr : ☐\_0 No ☐\_1 Yes ☐\_9 NSP

Goats in rooms today : ☐\_0 No ☐\_1 Yes ☐\_9 NSP

Goats in rooms 0-1yr : ☐\_0 No ☐\_1 Yes ☐\_9 NSP

Chicken, ducks in rooms today : ☐\_0 No ☐\_1 Yes ☐\_9 NSP

Chicken, ducks in rooms 0-1yr : ☐\_0 No ☐\_1 Yes ☐\_9 NSP

Rodents (rats, mice, etc.) in rooms today : ☐\_0 No ☐\_1 Yes ☐\_9 NSP

Rodents (rats, mice, etc.) in rooms 0-1yr : ☐\_0 No ☐\_1 Yes ☐\_9 NSP

Cockroaches in rooms today : ☐\_0 No ☐\_1 Yes ☐\_9 NSP

Cockroaches in rooms 0-1yr : ☐\_0 No ☐\_1 Yes ☐\_9 NSP

Other in rooms today : ☐\_0 No ☐\_1 Yes ☐\_9 NSP

Other in rooms 0-1yr : ☐\_0 No ☐\_1 Yes ☐\_9 NSP

☐ DOGTODAY

☐ DOG01YR

☐ CATTODAY

☐ CAT01YR

☐ SHEEPTODAY

☐ SHEEP01YR

☐ GOATODAY

☐ GOA01YR

☐ CHICTODAY

☐ CHIC01YR

☐ RODTODAY

☐ ROD01YR

☐ COCTODAY

☐ COC01YR

☐ OTHTODAY

☐ OTH01YR

If Others, define : .....

..... NAMEOTH

2. Which of these animals could be in **contact** with your child **at least once per week**

(today and/or during his first year of life) ?

Contact with Dogs today : ☐ No ☐ Yes ☐ NSP

Contact with Dogs 0-1yr : ☐ No ☐ Yes ☐ NSP

Contact with Cats today : ☐ No ☐ Yes ☐ NSP

Contact with Cats 0-1yr : ☐ No ☐ Yes ☐ NSP

Contact with Sheep today : ☐ No ☐ Yes ☐ NSP

Contact with Sheep 0-1yr : ☐ No ☐ Yes ☐ NSP

Contact with Goats today : ☐ No ☐ Yes ☐ NSP

Contact with Goats 0-1yr : ☐ No ☐ Yes ☐ NSP

Contact with Chicken, Ducks today : ☐ No ☐ Yes ☐ NSP

Contact with Chicken, Ducks 0-1yr : ☐ No ☐ Yes ☐ NSP

Contact with donkeys, horses today : ☐ No ☐ Yes ☐ NSP

Contact with donkeys, horses 0-1yr : ☐ No ☐ Yes ☐ NSP

Contact with Cows, zébus today : ☐ No ☐ Yes ☐ NSP

Contact with Cows, zébus 0-1yr : ☐ No ☐ Yes ☐ NSP

Contact with Rodents (rats, mice, etc.) today : ☐ No ☐ Yes ☐ NSP

Contact with Rodents (rats, mice, etc.) 0-1yr : ☐ No ☐ Yes ☐ NSP

Contact with Other today : ☐ No ☐ Yes ☐ NSP

Contact with Other 0-1yr : ☐ No ☐ Yes ☐ NSP

If Others, define : .....

CDOGTODAY

CDOG01YR

CCATODAY

CCAT01YR

CSHEEPTODAY

CSHEEP01YR

CGOATODAY

CGOA01YR

CCHICTODAY

CCHIC01YR

CHORSTODAY

CHORS01YR

CCOWTODAY

CCOW01YR

CRODTODAY

CROD01YR

COTHTODAY

COTH01YR

NAMEOTHC

3. Which of these aliments are usually stocked in the rooms where your child lives ?

Millet kept in room : ☐ No ☐ Yes ☐ NSP

Sorghum kept in room : ☐ No ☐ Yes ☐ NSP

Maize kept in room : ☐ No ☐ Yes ☐ NSP

Rice kept in room : ☐ No ☐ Yes ☐ NSP

Wheat kept in room : ☐ No ☐ Yes ☐ NSP

Biscuits, pasta kept in room : ☐ No ☐ Yes ☐ NSP

Manioc (root, flour) kept in room : ☐ No ☐ Yes ☐ NSP

Cashew nut, ground nut kept in room : ☐ No ☐ Yes ☐ NSP

Curdled milk kept in room : ☐ No ☐ Yes ☐ NSP

Dried leaves (mint, quinquiliba, baobab, etc.) : ☐ No ☐ Yes ☐ NSP

Other aliments kept in room : ☐ No ☐ Yes ☐ NSP

If Others, define : .....

MIL

SORG

MAIZ

RICE

WHEA

BISCUI

MANIOC

NUTP

MILKCURD

LEAF

OTHALIM

NAMEOTHAL

What is the type of roofing of the rooms where your child lives (today and during the first year of life) ?

Corrugated metal roof today : ☐ No ☐ Yes ☐ NSP

Corrugated metal roof 0-1yr : ☐ No ☐ Yes ☐ NSP

Thatched roof today : ☐ No ☐ Yes ☐ NSP

Thatched roof 0-1yr : ☐ No ☐ Yes ☐ NSP

Wooden roof today : ☐ No ☐ Yes ☐ NSP

Wooden roof 0-1yr : ☐ No ☐ Yes ☐ NSP

Cement roof today : ☐ No ☐ Yes ☐ NSP

Cement roof 0-1yr : ☐ No ☐ Yes ☐ NSP

Plaster roof today : ☐ No ☐ Yes ☐ NSP

Plaster roof 0-1yr : ☐ No ☐ Yes ☐ NSP

Other type of roof today : ☐ No ☐ Yes ☐ NSP

RMETTODAY

RMET01YR

RTHATDAY

RTHAT01YR

RWOOTODAY

RWOO01YR

RCEMTODAY

RCEM01YR

RPLATODAY

RPLA01YR

ROTHTODAY

|    |                                                                                                               |                                                                                       |  |             |
|----|---------------------------------------------------------------------------------------------------------------|---------------------------------------------------------------------------------------|--|-------------|
| 1  | Other type of roof 0-1yr :                                                                                    | <input type="checkbox"/> No <input type="checkbox"/> Yes <input type="checkbox"/> NSP |  | ROTH01YR    |
| 2  |                                                                                                               |                                                                                       |  |             |
| 3  |                                                                                                               |                                                                                       |  |             |
| 4  |                                                                                                               |                                                                                       |  |             |
| 5  | 4. Which of these objects are in the room where your child sleeps (today and during the first year of life) ? |                                                                                       |  |             |
| 6  |                                                                                                               |                                                                                       |  |             |
| 7  | Mattress in room today :                                                                                      | <input type="checkbox"/> No <input type="checkbox"/> Yes <input type="checkbox"/> NSP |  | MATR01YR    |
| 8  | Mattress in room 0-1yr :                                                                                      | <input type="checkbox"/> No <input type="checkbox"/> Yes <input type="checkbox"/> NSP |  | MATR01YR    |
| 9  | Bednet in room today :                                                                                        | <input type="checkbox"/> No <input type="checkbox"/> Yes <input type="checkbox"/> NSP |  | BEDNTODAY   |
| 10 | Bednet in room 0-1yr :                                                                                        | <input type="checkbox"/> No <input type="checkbox"/> Yes <input type="checkbox"/> NSP |  | BEDN01YR    |
| 11 | Wardrobe in room today :                                                                                      | <input type="checkbox"/> No <input type="checkbox"/> Yes <input type="checkbox"/> NSP |  | WARDTODAY   |
| 12 | Wardrobe in room 0-1yr :                                                                                      | <input type="checkbox"/> No <input type="checkbox"/> Yes <input type="checkbox"/> NSP |  | WARD01YR    |
| 13 | Chest, trunk in room today :                                                                                  | <input type="checkbox"/> No <input type="checkbox"/> Yes <input type="checkbox"/> NSP |  | CHESTODAY   |
| 14 | Chest, trunk in room 0-1yr :                                                                                  | <input type="checkbox"/> No <input type="checkbox"/> Yes <input type="checkbox"/> NSP |  | CHES01YR    |
| 15 | Table in room today :                                                                                         | <input type="checkbox"/> No <input type="checkbox"/> Yes <input type="checkbox"/> NSP |  | TABPTODAY   |
| 16 | Table in room 0-1yr :                                                                                         | <input type="checkbox"/> No <input type="checkbox"/> Yes <input type="checkbox"/> NSP |  | TABP01YR    |
| 17 | Chair in room today :                                                                                         | <input type="checkbox"/> No <input type="checkbox"/> Yes <input type="checkbox"/> NSP |  | CHPTODAY    |
| 18 | Chair in room 0-1yr :                                                                                         | <input type="checkbox"/> No <input type="checkbox"/> Yes <input type="checkbox"/> NSP |  | CHA01YR     |
| 19 | Carpet, rug in room today :                                                                                   | <input type="checkbox"/> No <input type="checkbox"/> Yes <input type="checkbox"/> NSP |  | CARPTODAY   |
| 20 | Carpet, rug in room 0-1yr :                                                                                   | <input type="checkbox"/> No <input type="checkbox"/> Yes <input type="checkbox"/> NSP |  | CARP01YR    |
| 21 | Matting in room today :                                                                                       | <input type="checkbox"/> No <input type="checkbox"/> Yes <input type="checkbox"/> NSP |  | MATPTODAY   |
| 22 | Matting in room 0-1yr :                                                                                       | <input type="checkbox"/> No <input type="checkbox"/> Yes <input type="checkbox"/> NSP |  | MATP01YR    |
| 23 | Curtains in room today :                                                                                      | <input type="checkbox"/> No <input type="checkbox"/> Yes <input type="checkbox"/> NSP |  | CURTTODAY   |
| 24 | Curtains in room 0-1yr :                                                                                      | <input type="checkbox"/> No <input type="checkbox"/> Yes <input type="checkbox"/> NSP |  | CURT01YR    |
| 25 | Malagasy fire in room today :                                                                                 | <input type="checkbox"/> No <input type="checkbox"/> Yes <input type="checkbox"/> NSP |  | FIRTODAY    |
| 26 | Malagasy fire in room 0-1yr :                                                                                 | <input type="checkbox"/> No <input type="checkbox"/> Yes <input type="checkbox"/> NSP |  | FIR01YR     |
| 27 | Other objects in room today :                                                                                 | <input type="checkbox"/> No <input type="checkbox"/> Yes <input type="checkbox"/> NSP |  | OTHOB01YR   |
| 28 | Other objects in room 0-1yr :                                                                                 | <input type="checkbox"/> No <input type="checkbox"/> Yes <input type="checkbox"/> NSP |  | OTHOB01YR   |
| 29 |                                                                                                               |                                                                                       |  |             |
| 30 |                                                                                                               |                                                                                       |  |             |
| 31 |                                                                                                               |                                                                                       |  |             |
| 32 |                                                                                                               |                                                                                       |  |             |
| 33 |                                                                                                               |                                                                                       |  |             |
| 34 |                                                                                                               |                                                                                       |  |             |
| 35 |                                                                                                               |                                                                                       |  |             |
| 36 |                                                                                                               |                                                                                       |  |             |
| 37 | 5. On what type of bedding does your child sleep (today and during the first year of life) ?                  |                                                                                       |  |             |
| 38 | Foam mattress today :                                                                                         | <input type="checkbox"/> No <input type="checkbox"/> Yes <input type="checkbox"/> NSP |  | FMATR01YR   |
| 39 | Foam mattress 0-1yr :                                                                                         | <input type="checkbox"/> No <input type="checkbox"/> Yes <input type="checkbox"/> NSP |  | FMATR01YR   |
| 40 | Plant fibre mattress (straw, etc.) today :                                                                    | <input type="checkbox"/> No <input type="checkbox"/> Yes <input type="checkbox"/> NSP |  | PLFMATR01YR |
| 41 | Plant fibre mattress (straw, etc.) 0-1yr :                                                                    | <input type="checkbox"/> No <input type="checkbox"/> Yes <input type="checkbox"/> NSP |  | PLFMATR01YR |
| 42 | Wool mattress today :                                                                                         | <input type="checkbox"/> No <input type="checkbox"/> Yes <input type="checkbox"/> NSP |  | WOMATR01YR  |
| 43 | Wool mattress 0-1yr :                                                                                         | <input type="checkbox"/> No <input type="checkbox"/> Yes <input type="checkbox"/> NSP |  | WOMATR01YR  |
| 44 | Feather mattress today :                                                                                      | <input type="checkbox"/> No <input type="checkbox"/> Yes <input type="checkbox"/> NSP |  | FEATHMTODAY |
| 45 | Feather mattress 0-1yr :                                                                                      | <input type="checkbox"/> No <input type="checkbox"/> Yes <input type="checkbox"/> NSP |  | FEATHM01YR  |
| 46 | Plastic matting today :                                                                                       | <input type="checkbox"/> No <input type="checkbox"/> Yes <input type="checkbox"/> NSP |  | PLMAT01YR   |
| 47 | Plastic matting 0-1yr :                                                                                       | <input type="checkbox"/> No <input type="checkbox"/> Yes <input type="checkbox"/> NSP |  | PLMAT01YR   |
| 48 | Plant fibre matting (straw, etc.) today :                                                                     | <input type="checkbox"/> No <input type="checkbox"/> Yes <input type="checkbox"/> NSP |  | PLFMAT01YR  |
| 49 | Plant fibre matting (straw, etc.) 0-1yr :                                                                     | <input type="checkbox"/> No <input type="checkbox"/> Yes <input type="checkbox"/> NSP |  | PLFMAT01YR  |
| 50 | Other type of bedding today :                                                                                 | <input type="checkbox"/> No <input type="checkbox"/> Yes <input type="checkbox"/> NSP |  | OTHBEDTODAY |
| 51 | Other type of bedding 0-1yr :                                                                                 | <input type="checkbox"/> No <input type="checkbox"/> Yes <input type="checkbox"/> NSP |  | OTHBED01YR  |
| 52 |                                                                                                               |                                                                                       |  |             |
| 53 |                                                                                                               |                                                                                       |  |             |
| 54 |                                                                                                               |                                                                                       |  |             |
| 55 |                                                                                                               |                                                                                       |  |             |
| 56 |                                                                                                               |                                                                                       |  |             |
| 57 |                                                                                                               |                                                                                       |  |             |
| 58 | 6. Does your child sleep on a pillow ?                                                                        | <input type="checkbox"/> No <input type="checkbox"/> Yes <input type="checkbox"/> NSP |  | PILLOW      |
| 59 | If No, go to question 8                                                                                       |                                                                                       |  |             |
| 60 |                                                                                                               |                                                                                       |  |             |

If **Yes**, what type of pillow is it ?

Foam : ☐ No ☐ Yes ☐ NSP  
 Synthetic fibres: ☐ No ☐ Yes ☐ NSP  
 Plant fibres (straw, etc.) : ☐ No ☐ Yes ☐ NSP  
 Feather : ☐ No ☐ Yes ☐ NSP  
 Other type of pillow : ☐ No ☐ Yes ☐ NSP

If other, define : .....

☐ PILLF  
☐ PILLSYN  
☐ PILLPLF  
☐ PILLFEATH  
☐ OTHPILL  
 ..... NAMEOTHPILL

7. Do people smoke in the room where your child lives ?

Today : ☐ No ☐ Yes ☐ NSP  
 From 0-1yr : ☐ No ☐ Yes ☐ NSP  
 During the pregnancy of the mother : ☐ No ☐ Yes ☐ NSP

☐ SMOKTODAY  
☐ SMOK01YR  
☐ SMOKPREG

8. What type of heating and lighting are used in the rooms where your child lives ?

Heating and lighting by charcoal : ☐ No ☐ Yes ☐ NSP  
 Heating and lighting by wood : ☐ No ☐ Yes ☐ NSP  
 Lighting by candle : ☐ No ☐ Yes ☐ NSP  
 Lighting by petrol lamp : ☐ No ☐ Yes ☐ NSP  
 Lighting by flash light : ☐ No ☐ Yes ☐ NSP  
 Lighting by solar : ☐ No ☐ Yes ☐ NSP  
 Other types of heating and lighting: ☐ No ☐ Yes ☐ NSP

If other, define : .....

☐ CHELCHAR  
☐ CHELWOO  
☐ LCAND  
☐ LLAMP  
☐ LTORCH  
☐ LSOLAR  
☐ OTHHEL  
 ..... NAMEOTHHHEL

9. Which of the following products are used or stocked in the rooms where you child lives ?

Insecticide (type Yotox, spirales, etc.) : ☐ No ☐ Yes ☐ NSP  
 Deodorants (aerosols) : ☐ No ☐ Yes ☐ NSP  
 Incense : ☐ No ☐ Yes ☐ NSP  
 Detergents (type Cotel, etc.) : ☐ No ☐ Yes ☐ NSP  
 Petrol, diesel : ☐ No ☐ Yes ☐ NSP  
 Other types of products : ☐ No ☐ Yes ☐ NSP

If other, define : .....

☐ INSECTIC  
☐ DEODORA  
☐ INCENSE  
☐ DETERGEN  
☐ PETROL  
☐ OTHPROD  
 ..... NAMEOTHPR

**Diet :**

1. Has your child had **diarrhoea without fever** or abdominal pains (colic)

**following introduction of non-maternal milk** in his diet (cow or goat's milk, milk powder) : ☐ No ☐ Yes ☐ NSP

**after a few months** of consuming **non-maternal** (cow or goat's milk, milk powder) : ☐ No ☐ Yes ☐ NSP

☐ DIARINT  
☐ DIARMONTH

2. Currently, how many times, on average, does your child eat the following aliments ?

*The consumption of certain aliments is seasonal.*

Meat : ☐ Never ☐ <1times/week ☐ 1-2 times/week ☐ ≥1times/day  
 Fish : ☐ Never ☐ <1times/week ☐ 1-2 times/week ☐ ≥1times/day  
 Egg : ☐ Never ☐ <1times/week ☐ 1-2 times/week ☐ ≥1times/day  
 Milk (liquid, powder, curdled) : ☐ Never ☐ <1times/week ☐ 1-2 times/week ☐ ≥1times/day  
 Banana : ☐ Never ☐ <1times/week ☐ 1-2 times/week ☐ ≥1times/day  
 Mango : ☐ Never ☐ <1times/week ☐ 1-2 times/week ☐ ≥1times/day  
 Melon : ☐ Never ☐ <1times/week ☐ 1-2 times/week ☐ ≥1times/day

☐ CONSMEAT  
☐ CONSFISH  
☐ CONSEGG  
☐ CONSMILK  
☐ CONSBANA  
☐ CONSMANG  
☐ CONSMELON

|                                                                                                                                                                                                                  |                                   |                                          |                                            |                                         |                                   |                                    |                                     |                                 |
|------------------------------------------------------------------------------------------------------------------------------------------------------------------------------------------------------------------|-----------------------------------|------------------------------------------|--------------------------------------------|-----------------------------------------|-----------------------------------|------------------------------------|-------------------------------------|---------------------------------|
| Orange, lime :                                                                                                                                                                                                   | <input type="checkbox"/> _1 Never | <input type="checkbox"/> _2 <1times/week | <input type="checkbox"/> _3 1-2 times/week | <input type="checkbox"/> _4 ≥1times/day | <input type="checkbox"/>          | CONSORAN                           |                                     |                                 |
| Potatoes, sweet potatoes :                                                                                                                                                                                       | <input type="checkbox"/> _1 Never | <input type="checkbox"/> _2 <1times/week | <input type="checkbox"/> _3 1-2 times/week | <input type="checkbox"/> _4 ≥1times/day | <input type="checkbox"/>          | CONSPOT                            |                                     |                                 |
| Vegetables :                                                                                                                                                                                                     | <input type="checkbox"/> _1 Never | <input type="checkbox"/> _2 <1times/week | <input type="checkbox"/> _3 1-2 times/week | <input type="checkbox"/> _4 ≥1times/day | <input type="checkbox"/>          | CONSVEG                            |                                     |                                 |
| Millet :                                                                                                                                                                                                         | <input type="checkbox"/> _1 Never | <input type="checkbox"/> _2 <1times/week | <input type="checkbox"/> _3 1-2 times/week | <input type="checkbox"/> _4 ≥1times/day | <input type="checkbox"/>          | CONSMIL                            |                                     |                                 |
| Sorghum :                                                                                                                                                                                                        | <input type="checkbox"/> _1 Never | <input type="checkbox"/> _2 <1times/week | <input type="checkbox"/> _3 1-2 times/week | <input type="checkbox"/> _4 ≥1times/day | <input type="checkbox"/>          | CONSSORG                           |                                     |                                 |
| Maize :                                                                                                                                                                                                          | <input type="checkbox"/> _1 Never | <input type="checkbox"/> _2 <1times/week | <input type="checkbox"/> _3 1-2 times/week | <input type="checkbox"/> _4 ≥1times/day | <input type="checkbox"/>          | CONSMAIS                           |                                     |                                 |
| Rice :                                                                                                                                                                                                           | <input type="checkbox"/> _1 Never | <input type="checkbox"/> _2 <1times/week | <input type="checkbox"/> _3 1-2 times/week | <input type="checkbox"/> _4 ≥1times/day | <input type="checkbox"/>          | CONSRICE                           |                                     |                                 |
| Wheat (bread, pasta) :                                                                                                                                                                                           | <input type="checkbox"/> _1 Never | <input type="checkbox"/> _2 <1times/week | <input type="checkbox"/> _3 1-2 times/week | <input type="checkbox"/> _4 ≥1times/day | <input type="checkbox"/>          | CONSWHEA                           |                                     |                                 |
| Nuts (Cashew, ground nut) :                                                                                                                                                                                      | <input type="checkbox"/> _1 Never | <input type="checkbox"/> _2 <1times/week | <input type="checkbox"/> _3 1-2 times/week | <input type="checkbox"/> _4 ≥1times/day | <input type="checkbox"/>          | CONSNOT                            |                                     |                                 |
| Prawns, dried oysters :                                                                                                                                                                                          | <input type="checkbox"/> _1 Never | <input type="checkbox"/> _2 <1times/week | <input type="checkbox"/> _3 1-2 times/week | <input type="checkbox"/> _4 ≥1times/day | <input type="checkbox"/>          | CONSPRAWN                          |                                     |                                 |
| Flavouring cubes Maggi :                                                                                                                                                                                         | <input type="checkbox"/> _1 Never | <input type="checkbox"/> _2 <1times/week | <input type="checkbox"/> _3 1-2 times/week | <input type="checkbox"/> _4 ≥1times/day | <input type="checkbox"/>          | CONSCUBE                           |                                     |                                 |
| Other :                                                                                                                                                                                                          | <input type="checkbox"/> _1 Never | <input type="checkbox"/> _2 <1times/week | <input type="checkbox"/> _3 1-2 times/week | <input type="checkbox"/> _4 ≥1times/day | <input type="checkbox"/>          | OTHALCON                           |                                     |                                 |
| If other, define : .....                                                                                                                                                                                         |                                   |                                          |                                            |                                         | <input type="checkbox"/>          | NAMEOTHAL                          |                                     |                                 |
| <b><u>HISTORICAL SYMPTOMATOLOGY OF ALLERGIC REACTIONS</u></b>                                                                                                                                                    |                                   |                                          |                                            |                                         |                                   |                                    |                                     |                                 |
| <b><u>Asthma :</u></b>                                                                                                                                                                                           |                                   |                                          |                                            |                                         |                                   |                                    |                                     |                                 |
| 1. Has a doctor or nurse <b>already</b> said that your child has asthma ?                                                                                                                                        |                                   |                                          |                                            |                                         | <input type="checkbox"/>          | ASTHMA                             |                                     |                                 |
|                                                                                                                                                                                                                  |                                   |                                          |                                            |                                         | <input type="checkbox"/> _0 No    | <input type="checkbox"/> _1 Yes    | <input type="checkbox"/> _9 NSP     |                                 |
| 2. Has your child already breathed noisily or had whistling in his chest whilst breathing                                                                                                                        |                                   |                                          |                                            |                                         | <input type="checkbox"/>          | WHISTLING                          |                                     |                                 |
|                                                                                                                                                                                                                  |                                   |                                          |                                            |                                         | <input type="checkbox"/> _0 No    | <input type="checkbox"/> _1 Yes    | <input type="checkbox"/> _9 NSP     |                                 |
| If <b>No</b> , go directly to question 6                                                                                                                                                                         |                                   |                                          |                                            |                                         | <input type="checkbox"/>          | WHISTLING                          |                                     |                                 |
| 3. During his first two years of life, has your child already breathed noisily or had whistling in his chest whilst breathing ?                                                                                  |                                   |                                          |                                            |                                         | <input type="checkbox"/>          | WHISTL2YR                          |                                     |                                 |
|                                                                                                                                                                                                                  |                                   |                                          |                                            |                                         | <input type="checkbox"/> _0 No    | <input type="checkbox"/> _1 Yes    | <input type="checkbox"/> _9 NSP     |                                 |
| If <b>No</b> , go directly to question 6                                                                                                                                                                         |                                   |                                          |                                            |                                         | <input type="checkbox"/>          | NBWHIS2YR                          |                                     |                                 |
| If <b>Yes</b> , how many times (before 2 years of age) ?                                                                                                                                                         |                                   |                                          |                                            |                                         | <input type="checkbox"/>          | NBWHIS2YR                          |                                     |                                 |
|                                                                                                                                                                                                                  |                                   |                                          |                                            |                                         | <input type="checkbox"/> _1 1time | <input type="checkbox"/> _2 2times | <input type="checkbox"/> _3 ≥3times | <input type="checkbox"/> _9 NSP |
| Between the last two <b>ramadans</b> , has your child already breathed noisily or had whistling in his chest whilst breathing ?                                                                                  |                                   |                                          |                                            |                                         | <input type="checkbox"/>          | WHISTL2RA                          |                                     |                                 |
|                                                                                                                                                                                                                  |                                   |                                          |                                            |                                         | <input type="checkbox"/> _0 No    | <input type="checkbox"/> _1 Yes    | <input type="checkbox"/> _9 NSP     |                                 |
| If <b>No</b> , go directly to question 5                                                                                                                                                                         |                                   |                                          |                                            |                                         | <input type="checkbox"/>          | WHISTLRS                           |                                     |                                 |
| If <b>Yes</b> , at which moment of the year ?                                                                                                                                                                    |                                   |                                          |                                            |                                         | <input type="checkbox"/>          | WHISTLDS                           |                                     |                                 |
| Rainy season :                                                                                                                                                                                                   |                                   |                                          |                                            |                                         | <input type="checkbox"/> _0 No    | <input type="checkbox"/> _1 Yes    | <input type="checkbox"/> _9 NSP     |                                 |
| Dry season :                                                                                                                                                                                                     |                                   |                                          |                                            |                                         | <input type="checkbox"/> _0 No    | <input type="checkbox"/> _1 Yes    | <input type="checkbox"/> _9 NSP     |                                 |
| Harvest time :                                                                                                                                                                                                   |                                   |                                          |                                            |                                         | <input type="checkbox"/> _0 No    | <input type="checkbox"/> _1 Yes    | <input type="checkbox"/> _9 NSP     |                                 |
| Has the noisy breathing of your child been such that it has prevented him from talking normally?                                                                                                                 |                                   |                                          |                                            |                                         | <input type="checkbox"/>          | PREVTALK                           |                                     |                                 |
|                                                                                                                                                                                                                  |                                   |                                          |                                            |                                         | <input type="checkbox"/> _0 No    | <input type="checkbox"/> _1 Yes    | <input type="checkbox"/> _9 NSP     |                                 |
| Has your child already had a rasping cough at night that prevents him from sleeping normally ?                                                                                                                   |                                   |                                          |                                            |                                         | <input type="checkbox"/>          | TOUSECHE                           |                                     |                                 |
|                                                                                                                                                                                                                  |                                   |                                          |                                            |                                         | <input type="checkbox"/> _0 No    | <input type="checkbox"/> _1 Yes    | <input type="checkbox"/> _9 NSP     |                                 |
| <b><u>Rhinitis and allergic conjunctivitis:</u></b>                                                                                                                                                              |                                   |                                          |                                            |                                         |                                   |                                    |                                     |                                 |
| 1. Has your child <b>already had</b> problems of a runny nose, <b>or</b> a sensation of a blocked nose, <b>or</b> an itchy nose, <b>or</b> sneezing, or loss of the sense of smell <b>for more than a week</b> , |                                   |                                          |                                            |                                         | <input type="checkbox"/>          |                                    |                                     |                                 |

|                                                                                                                                                                                                                                                                            |                                                                                       |                          |            |
|----------------------------------------------------------------------------------------------------------------------------------------------------------------------------------------------------------------------------------------------------------------------------|---------------------------------------------------------------------------------------|--------------------------|------------|
| irrespective of the frequency of these episodes?                                                                                                                                                                                                                           | <input type="checkbox"/> No <input type="checkbox"/> Yes <input type="checkbox"/> NSP | <input type="checkbox"/> | RHIN1WEEK  |
| 2. Has your child <b>already had</b> problems of a runny nose, <b>or</b> a sensation of a blocked nose, <b>or</b> an itchy nose, <b>or</b> sneezing, or loss of the sense of smell <b>more than 5 times in one year</b> , irrespective of the frequency of these episodes? | <input type="checkbox"/> No <input type="checkbox"/> Yes <input type="checkbox"/> NSP | <input type="checkbox"/> | RHIN5FAN   |
| Between the <b>last two ramadans</b> , has your child <b>already had</b> problems of a runny nose, <b>or</b> a sensation of a blocked nose, <b>or</b> an itchy nose, <b>or</b> sneezing, or loss of the sense of smell ?                                                   | <input type="checkbox"/> No <input type="checkbox"/> Yes <input type="checkbox"/> NSP | <input type="checkbox"/> | RHIN2RAM   |
| If <b>No</b> , go to question 4                                                                                                                                                                                                                                            |                                                                                       |                          |            |
| If <b>Yes</b> , at what moment of the year ?                                                                                                                                                                                                                               |                                                                                       |                          |            |
| Rainy season :                                                                                                                                                                                                                                                             | <input type="checkbox"/> No <input type="checkbox"/> Yes <input type="checkbox"/> NSP | <input type="checkbox"/> | RHINRS     |
| Dry season :                                                                                                                                                                                                                                                               | <input type="checkbox"/> No <input type="checkbox"/> Yes <input type="checkbox"/> NSP | <input type="checkbox"/> | RHINDS     |
| Harvest time :                                                                                                                                                                                                                                                             | <input type="checkbox"/> No <input type="checkbox"/> Yes <input type="checkbox"/> NSP | <input type="checkbox"/> | RHINHT     |
| 3. Has your child <b>already had</b> watery eyes, <b>or</b> itchy eyes, <b>or</b> an allergic limbo-conjunctivitis?                                                                                                                                                        | <input type="checkbox"/> No <input type="checkbox"/> Yes <input type="checkbox"/> NSP | <input type="checkbox"/> | CONJALER   |
| If <b>No</b> , go directly to question 1 in the section <b>Eczema</b>                                                                                                                                                                                                      |                                                                                       |                          |            |
| Has your child had, between the <b>last two ramadans</b> , watery eyes, <b>or</b> itchy eyes, <b>or</b> an allergic limbo-conjunctivitis?                                                                                                                                  | <input type="checkbox"/> No <input type="checkbox"/> Yes <input type="checkbox"/> NSP | <input type="checkbox"/> | CONJ2RAM   |
| If <b>No</b> , go directly to question 5                                                                                                                                                                                                                                   |                                                                                       |                          |            |
| If <b>Yes</b> , at what moment of the year ?                                                                                                                                                                                                                               |                                                                                       |                          |            |
| Rainy season :                                                                                                                                                                                                                                                             | <input type="checkbox"/> No <input type="checkbox"/> Yes <input type="checkbox"/> NSP | <input type="checkbox"/> | CONJRS     |
| Dry season :                                                                                                                                                                                                                                                               | <input type="checkbox"/> No <input type="checkbox"/> Yes <input type="checkbox"/> NSP | <input type="checkbox"/> | CONJDS     |
| Harvest time :                                                                                                                                                                                                                                                             | <input type="checkbox"/> No <input type="checkbox"/> Yes <input type="checkbox"/> NSP | <input type="checkbox"/> | CONJHT     |
| <b><u>Eczéma :</u></b>                                                                                                                                                                                                                                                     |                                                                                       |                          |            |
| Has your child <b>already had</b> skin problems with dry patches or seeping cracked patches and itching ?                                                                                                                                                                  | <input type="checkbox"/> No <input type="checkbox"/> Yes <input type="checkbox"/> NSP | <input type="checkbox"/> | ECZEMA     |
| If <b>No</b> , the questionnaire has finished.                                                                                                                                                                                                                             |                                                                                       |                          |            |
| Between the <b>last two ramadans</b> , has your child had skin problems with dry patches or seeping cracked patches and itching ??                                                                                                                                         | <input type="checkbox"/> No <input type="checkbox"/> Yes <input type="checkbox"/> NSP | <input type="checkbox"/> | ECZE2RAM   |
| If <b>No</b> , go directly to question 3                                                                                                                                                                                                                                   |                                                                                       |                          |            |
| If <b>Yes</b> , at what moment of the year ?                                                                                                                                                                                                                               |                                                                                       |                          |            |
| Rainy season :                                                                                                                                                                                                                                                             | <input type="checkbox"/> No <input type="checkbox"/> Yes <input type="checkbox"/> NSP | <input type="checkbox"/> | ECZEMARS   |
| Dry season :                                                                                                                                                                                                                                                               | <input type="checkbox"/> No <input type="checkbox"/> Yes <input type="checkbox"/> NSP | <input type="checkbox"/> | ECZEMADS   |
| Harvest time :                                                                                                                                                                                                                                                             | <input type="checkbox"/> No <input type="checkbox"/> Yes <input type="checkbox"/> NSP | <input type="checkbox"/> | ECZEMAHT   |
| 1. Have these skin problems affected different parts of the body of your child ?                                                                                                                                                                                           |                                                                                       |                          |            |
| Scalp :                                                                                                                                                                                                                                                                    | <input type="checkbox"/> No <input type="checkbox"/> Yes <input type="checkbox"/> NSP | <input type="checkbox"/> | ECZESCALP  |
| Face :                                                                                                                                                                                                                                                                     | <input type="checkbox"/> No <input type="checkbox"/> Yes <input type="checkbox"/> NSP | <input type="checkbox"/> | ECZEFAC    |
| Around the eyes and ears :                                                                                                                                                                                                                                                 | <input type="checkbox"/> No <input type="checkbox"/> Yes <input type="checkbox"/> NSP | <input type="checkbox"/> | ECZEEYEARS |
| Armpits :                                                                                                                                                                                                                                                                  | <input type="checkbox"/> No <input type="checkbox"/> Yes <input type="checkbox"/> NSP | <input type="checkbox"/> | ECZEEYEARS |

For peer review only - <http://bmjopen.bmj.com/site/about/guidelines.xhtml>

## STROBE Statement—checklist of items included in reports of observational studies

|                           | Item No | Recommendation                                                                                                                                                                                                                                                                                                                                                                                                                                                                                                                                                    |
|---------------------------|---------|-------------------------------------------------------------------------------------------------------------------------------------------------------------------------------------------------------------------------------------------------------------------------------------------------------------------------------------------------------------------------------------------------------------------------------------------------------------------------------------------------------------------------------------------------------------------|
| <b>Title and abstract</b> | 1       | (a) Indicate the study's design with a commonly used term in the title or the abstract<br>(b) Provide in the abstract an informative and balanced summary of what was done and what was found                                                                                                                                                                                                                                                                                                                                                                     |
| <b>Introduction</b>       |         |                                                                                                                                                                                                                                                                                                                                                                                                                                                                                                                                                                   |
| Background/rationale      | 2       | Explain the scientific background and rationale for the investigation being reported                                                                                                                                                                                                                                                                                                                                                                                                                                                                              |
| Objectives                | 3       | State specific objectives, including any prespecified hypotheses                                                                                                                                                                                                                                                                                                                                                                                                                                                                                                  |
| <b>Methods</b>            |         |                                                                                                                                                                                                                                                                                                                                                                                                                                                                                                                                                                   |
| Study design              | 4       | Present key elements of study design early in the paper                                                                                                                                                                                                                                                                                                                                                                                                                                                                                                           |
| Setting                   | 5       | Describe the setting, locations, and relevant dates, including periods of recruitment, exposure, follow-up, and data collection                                                                                                                                                                                                                                                                                                                                                                                                                                   |
| Participants              | 6       | (a) <i>Cohort study</i> —Give the eligibility criteria, and the sources and methods of selection of participants. Describe methods of follow-up<br><i>Cross-sectional study</i> —Give the eligibility criteria, and the sources and methods of selection of participants<br>(b) <i>Cohort study</i> —For matched studies, give matching criteria and number of exposed and unexposed                                                                                                                                                                              |
| Variables                 | 7       | Clearly define all outcomes, exposures, predictors, potential confounders, and effect modifiers. Give diagnostic criteria, if applicable                                                                                                                                                                                                                                                                                                                                                                                                                          |
| Data sources/measurement  | 8*      | For each variable of interest, give sources of data and details of methods of assessment (measurement). Describe comparability of assessment methods if there is more than one group                                                                                                                                                                                                                                                                                                                                                                              |
| Bias                      | 9       | Describe any efforts to address potential sources of bias                                                                                                                                                                                                                                                                                                                                                                                                                                                                                                         |
| Study size                | 10      | Explain how the study size was arrived at                                                                                                                                                                                                                                                                                                                                                                                                                                                                                                                         |
| Quantitative variables    | 11      | Explain how quantitative variables were handled in the analyses. If applicable, describe which groupings were chosen and why                                                                                                                                                                                                                                                                                                                                                                                                                                      |
| Statistical methods       | 12      | (a) Describe all statistical methods, including those used to control for confounding<br>(b) Describe any methods used to examine subgroups and interactions<br>(c) Explain how missing data were addressed<br>(d) <i>Cohort study</i> —If applicable, explain how loss to follow-up was addressed<br><i>Case-control study</i> —If applicable, explain how matching of cases and controls was addressed<br><i>Cross-sectional study</i> —If applicable, describe analytical methods taking account of sampling strategy<br>(e) Describe any sensitivity analyses |

Continued on next page

Results

|                  |     |                                                                                                                                                                                                                                                                                                                                                                                                               |
|------------------|-----|---------------------------------------------------------------------------------------------------------------------------------------------------------------------------------------------------------------------------------------------------------------------------------------------------------------------------------------------------------------------------------------------------------------|
| Participants     | 13* | (a) Report numbers of individuals at each stage of study—eg numbers potentially eligible, examined for eligibility, confirmed eligible, included in the study, completing follow-up, and analysed<br>(b) Give reasons for non-participation at each stage<br>(c) Consider use of a flow diagram                                                                                                               |
| Descriptive data | 14* | (a) Give characteristics of study participants (eg demographic, clinical, social) and information on exposures and potential confounders<br>(b) Indicate number of participants with missing data for each variable of interest<br>(c) Cohort study—Summarise follow-up time (eg, average and total amount)                                                                                                   |
| Outcome data     | 15* | Cohort study—Report numbers of outcome events or summary measures over time<br>Case-control study—Report numbers in each exposure category, or summary measures of exposure<br>Cross-sectional study—Report numbers of outcome events or summary measures                                                                                                                                                     |
| Main results     | 16  | (a) Give unadjusted estimates and, if applicable, confounder-adjusted estimates and their precision (eg, 95% confidence interval). Make clear which confounders were adjusted for and why they were included<br>(b) Report category boundaries when continuous variables were categorized<br>(c) If relevant, consider translating estimates of relative risk into absolute risk for a meaningful time period |
| Other analyses   | 17  | Report other analyses done—eg analyses of subgroups and interactions, and sensitivity analyses                                                                                                                                                                                                                                                                                                                |

Discussion

|                  |    |                                                                                                                                                                            |
|------------------|----|----------------------------------------------------------------------------------------------------------------------------------------------------------------------------|
| Key results      | 18 | Summarise key results with reference to study objectives                                                                                                                   |
| Limitations      | 19 | Discuss limitations of the study, taking into account sources of potential bias or imprecision. Discuss both direction and magnitude of any potential bias                 |
| Interpretation   | 20 | Give a cautious overall interpretation of results considering objectives, limitations, multiplicity of analyses, results from similar studies, and other relevant evidence |
| Generalisability | 21 | Discuss the generalisability (external validity) of the study results                                                                                                      |

Other information

|         |    |                                                                                                                                                               |
|---------|----|---------------------------------------------------------------------------------------------------------------------------------------------------------------|
| Funding | 22 | Give the source of funding and the role of the funders for the present study and, if applicable, for the original study on which the present article is based |
|---------|----|---------------------------------------------------------------------------------------------------------------------------------------------------------------|

\*Give information separately for cases and controls in case-control studies and, if applicable, for exposed and unexposed groups in cohort and cross-sectional studies.

**Note:** An Explanation and Elaboration article discusses each checklist item and gives methodological background and published examples of transparent reporting. The STROBE checklist is best used in conjunction with this article (freely available on the Web sites of PLoS Medicine at <http://www.plosmedicine.org/>, Annals of Internal Medicine at <http://www.annals.org/>, and Epidemiology at <http://www.epidem.com/>). Information on the STROBE Initiative is available at [www.strobe-statement.org](http://www.strobe-statement.org).
