# Supplementary material for: Asthma and atopic dermatitis are associated with increased risk of clinical Plasmodium falciparum malaria
Source: HighWire-hosted journal article supplement (doi:10.1136/bmjopen-2013-002835), 2013-07-01
Supplement: bmjopen-2013-002835supp_ISAACQuestionnaire.pdf [file bmjopen-2013-002835supp_ISAACQuestionnaire.pdf]

|                                                                                                             |                                                   |            |             |
|-------------------------------------------------------------------------------------------------------------|---------------------------------------------------|------------|-------------|
| <br><b>INSTITUT PASTEUR</b> | Unit of Functional Genetics of Infectious Disease | Coding :   |             |
|                                                                                                             | <b>ENREGISTREMENT</b>                             | 03/MM/YYYY | Version : 1 |
| <b>ALLERGY MODIFIED ISAAC QUESTIONNAIRE</b>                                                                 |                                                   |            |             |

|                                                                              |                                                                                                                |
|------------------------------------------------------------------------------|----------------------------------------------------------------------------------------------------------------|
| <b>Place of study</b><br>Technician X<br>Technician X<br>Technician X<br>☎ + | <b>Research Institute responsible</b><br>Name of Institute<br>Principle investigator<br>Project manager<br>☎ + |
|------------------------------------------------------------------------------|----------------------------------------------------------------------------------------------------------------|

| <u>IDENTIFICATION</u>                                                                                                                                                                                                                                                                                                     | <u>Validation zone</u> |
|---------------------------------------------------------------------------------------------------------------------------------------------------------------------------------------------------------------------------------------------------------------------------------------------------------------------------|------------------------|
| Date of questionnaire :  _ _ _ _ _ _ _ _  dd/mm/yyyy                                                                                                                                                                                                                                                                      | _ _ _ _ _ _ _  DTEQUE  |
| Name of investigator : .....                                                                                                                                                                                                                                                                                              |                        |
| Name of study supervisor : .....                                                                                                                                                                                                                                                                                          |                        |
| <b><u>Child :</u></b>                                                                                                                                                                                                                                                                                                     |                        |
| <b>First and last name of child :</b>                                                                                                                                                                                                                                                                                     |                        |
| <b>Identification code of child :</b>                                                                                                                                                                                                                                                                                     | _ _ _ _  IDENF         |
| <b>Date of birth :</b>                                                                                                                                                                                                                                                                                                    | _ _ _ _ _ _ _  DOB     |
| <b>Sex :</b>                                                                                                                                                                                                                                                                                                              | _  SEXE                |
| <b>Village/town :</b>                                                                                                                                                                                                                                                                                                     | _  VILLAGE             |
| <b>Identification code of Questionnaire :</b>                                                                                                                                                                                                                                                                             | _ _ _ _ _ _ _  IDQUES  |
| <b>Identification code of father :</b>                                                                                                                                                                                                                                                                                    | _ _ _ _  IDFA          |
| <b>Identification code of mother :</b>                                                                                                                                                                                                                                                                                    | _ _ _ _  IDMO          |
| <b>Weight :</b>  _ _ _ _ _  (kg)                                                                                                                                                                                                                                                                                          | _ _ _ _  (Kg) WEIGHT   |
| <b>Height :</b>  _ _ _ _ _  (cm)                                                                                                                                                                                                                                                                                          | _ _ _ _  (cm) HEIGHT   |
| <b>Mid Upper Arm Circumference:</b>  _ _ _  (cm)                                                                                                                                                                                                                                                                          | _ _  (cm) MUAC         |
| <b><u>Person questioned :</u></b>                                                                                                                                                                                                                                                                                         |                        |
| Last name of person questioned : .....                                                                                                                                                                                                                                                                                    | ..... NAMEPQ           |
| First name of person questioned : .....                                                                                                                                                                                                                                                                                   | ..... LASTNAMEPQ       |
| Relationship to child : Mother <input type="checkbox"/> <sub>1</sub> Father <input type="checkbox"/> <sub>2</sub> Brother/Sister <input type="checkbox"/> <sub>3</sub> Grand-parents <input type="checkbox"/> <sub>4</sub> Other <input type="checkbox"/> <sub>5</sub>                                                    | _  RELCHILD            |
| If other, define : .....                                                                                                                                                                                                                                                                                                  | ..... OTHERREL         |
| <b><u>FACTORS PREDISPOSING ATOPY</u></b>                                                                                                                                                                                                                                                                                  |                        |
| <b><u>First days of life :</u></b> Consultation of health records of child and maternity records of mother                                                                                                                                                                                                                |                        |
| 1. How much did your child weigh at birth ?                                                                                                                                                                                                                                                                               |                        |
| <1500 g <input type="checkbox"/> <sub>1</sub> [2500-3500[ g <input type="checkbox"/> <sub>4</sub><br>[1500-2000[ g <input type="checkbox"/> <sub>2</sub> ≥ 3500 g <input type="checkbox"/> <sub>5</sub><br>[2000-2500[ g <input type="checkbox"/> <sub>3</sub> Record not found/NSP <input type="checkbox"/> <sub>9</sub> | _  BIRTHWEIGH          |
| 2. Until what age did your child breastfeed (exclusively or mixed) ?<br><i>Corresponds to the age of weaning of child</i>                                                                                                                                                                                                 |                        |
| < 6 months <input type="checkbox"/> <sub>1</sub> 6 – 12 mths <input type="checkbox"/> <sub>2</sub> 12 – 24 mths <input type="checkbox"/> <sub>3</sub> >24 mths <input type="checkbox"/> <sub>4</sub> NSP <input type="checkbox"/> <sub>9</sub>                                                                            | _  AGEWEAN             |

3. Until what age did your child breastfeed **exclusively** without ever taking other aliments (fruits, vegetables, rice, meat, fish, etc.) or liquids (powdered milk, cow or goats milk, fruit juice, water, etc.) ?  
 < 6 months <sub>1</sub> 6 – 12 mths <sub>2</sub> 12 – 24 mths <sub>3</sub> NSP <sub>9</sub>

AGEBREAST

**Illness and vaccination :** Consultation of health records of child

1. Has your child enfant had the following illnesses?

Malaria : <sub>0</sub> No <sub>1</sub> Yes <sub>9</sub> NSP  
 Tuberculosis treated : <sub>0</sub> No <sub>1</sub> Yes <sub>9</sub> NSP  
 Helminths (oxyures, ascaris, taenia, etc.) : <sub>0</sub> No <sub>1</sub> Yes <sub>9</sub> NSP  
 Amoeba : <sub>0</sub> No <sub>1</sub> Yes <sub>9</sub> NSP  
 Measles : <sub>0</sub> No <sub>1</sub> Yes <sub>9</sub> NSP

MALAR  
 TUBTRT  
 HEMINTH  
 AMOEBA  
 MEASLES

2. Against what illnesses is you child vaccinated?

Yellow fever : <sub>0</sub> No <sub>1</sub> Yes <sub>9</sub> NSP  
 Hepatitis B : <sub>0</sub> No <sub>1</sub> Yes <sub>9</sub> NSP  
 Measles : <sub>0</sub> No <sub>1</sub> Yes <sub>9</sub> NSP  
 Mumps : <sub>0</sub> No <sub>1</sub> Yes <sub>9</sub> NSP  
 Rubella : <sub>0</sub> No <sub>1</sub> Yes <sub>9</sub> NSP  
 Tuberculosis/BCG : <sub>0</sub> No <sub>1</sub> Yes <sub>9</sub> NSP  
 Diphtheria/Tetanus/Pertussis/Poliomyelitis : <sub>0</sub> No <sub>1</sub> Yes <sub>9</sub> NSP  
 Typhoid : <sub>0</sub> No <sub>1</sub> Yes <sub>9</sub> NSP  
 Meningitis : <sub>0</sub> No <sub>1</sub> Yes <sub>9</sub> NSP  
 Haemophilus influenzae type B (HiB) : <sub>0</sub> No <sub>1</sub> Yes <sub>9</sub> NSP

VACFJ  
 VACHEPB  
 VACMEASLE  
 VACMUMPS  
 VACRUBEL  
 VACTUB  
 VACDTCP  
 VACTY  
 VACMENIN  
 VACHIB

**Habitation :**

1. Which of these animals / insects can be found in the **rooms** where your child lives (today and/or during his first year of life) ?

Dogs in rooms today : <sub>0</sub> No <sub>1</sub> Yes <sub>9</sub> NSP  
 Dogs in rooms 0-1yr : <sub>0</sub> No <sub>1</sub> Yes <sub>9</sub> NSP  
 Cats in rooms today : <sub>0</sub> No <sub>1</sub> Yes <sub>9</sub> NSP  
 Cats in rooms 0-1yr : <sub>0</sub> No <sub>1</sub> Yes <sub>9</sub> NSP  
 Sheep in rooms today : <sub>0</sub> No <sub>1</sub> Yes <sub>9</sub> NSP  
 Sheep in rooms 0-1yr : <sub>0</sub> No <sub>1</sub> Yes <sub>9</sub> NSP  
 Goats in rooms today : <sub>0</sub> No <sub>1</sub> Yes <sub>9</sub> NSP  
 Goats in rooms 0-1yr : <sub>0</sub> No <sub>1</sub> Yes <sub>9</sub> NSP  
 Chicken, ducks in rooms today : <sub>0</sub> No <sub>1</sub> Yes <sub>9</sub> NSP  
 Chicken, ducks in rooms 0-1yr : <sub>0</sub> No <sub>1</sub> Yes <sub>9</sub> NSP  
 Rodents (rats, mice, etc.) in rooms today : <sub>0</sub> No <sub>1</sub> Yes <sub>9</sub> NSP  
 Rodents (rats, mice, etc.) in rooms 0-1yr : <sub>0</sub> No <sub>1</sub> Yes <sub>9</sub> NSP  
 Cockroaches in rooms today : <sub>0</sub> No <sub>1</sub> Yes <sub>9</sub> NSP  
 Cockroaches in rooms 0-1yr : <sub>0</sub> No <sub>1</sub> Yes <sub>9</sub> NSP  
 Other in rooms today : <sub>0</sub> No <sub>1</sub> Yes <sub>9</sub> NSP  
 Other in rooms 0-1yr : <sub>0</sub> No <sub>1</sub> Yes <sub>9</sub> NSP

DOGTODAY  
 DOG01YR  
 CATTODAY  
 CAT01YR  
 SHEEPTODAY  
 SHEEP01YR  
 GOATODAY  
 GOA01YR  
 CHICTODAY  
 CHIC01YR  
 RODTODAY  
 ROD01YR  
 COCTODAY  
 COC01YR  
 OHTHODAY  
 OTH01YR  
 ..... NAMEOTH

If Others, define : .....

2. Which of these animals could be in **contact** with your child **at least once per week**

(today and/or during his first year of life) ?

|                                                 |                                                                                       |                          |             |
|-------------------------------------------------|---------------------------------------------------------------------------------------|--------------------------|-------------|
| Contact with Dogs today :                       | <input type="checkbox"/> No <input type="checkbox"/> Yes <input type="checkbox"/> NSP | <input type="checkbox"/> | CDOGTODAY   |
| Contact with Dogs 0-1yr :                       | <input type="checkbox"/> No <input type="checkbox"/> Yes <input type="checkbox"/> NSP | <input type="checkbox"/> | CDOG01YR    |
| Contact with Cats today :                       | <input type="checkbox"/> No <input type="checkbox"/> Yes <input type="checkbox"/> NSP | <input type="checkbox"/> | CCATODAY    |
| Contact with Cats 0-1yr :                       | <input type="checkbox"/> No <input type="checkbox"/> Yes <input type="checkbox"/> NSP | <input type="checkbox"/> | CCAT01YR    |
| Contact with Sheep today :                      | <input type="checkbox"/> No <input type="checkbox"/> Yes <input type="checkbox"/> NSP | <input type="checkbox"/> | CSHEEPTODAY |
| Contact with Sheep 0-1yr :                      | <input type="checkbox"/> No <input type="checkbox"/> Yes <input type="checkbox"/> NSP | <input type="checkbox"/> | CSHEEP01YR  |
| Contact with Goats today :                      | <input type="checkbox"/> No <input type="checkbox"/> Yes <input type="checkbox"/> NSP | <input type="checkbox"/> | CGOATODAY   |
| Contact with Goats 0-1yr :                      | <input type="checkbox"/> No <input type="checkbox"/> Yes <input type="checkbox"/> NSP | <input type="checkbox"/> | CGOA01YR    |
| Contact with Chicken, Ducks today :             | <input type="checkbox"/> No <input type="checkbox"/> Yes <input type="checkbox"/> NSP | <input type="checkbox"/> | CCHICTODAY  |
| Contact with Chicken, Ducks 0-1yr :             | <input type="checkbox"/> No <input type="checkbox"/> Yes <input type="checkbox"/> NSP | <input type="checkbox"/> | CCHIC01YR   |
| Contact with donkeys, horses today :            | <input type="checkbox"/> No <input type="checkbox"/> Yes <input type="checkbox"/> NSP | <input type="checkbox"/> | CHORSTODAY  |
| Contact with donkeys, horses 0-1yr :            | <input type="checkbox"/> No <input type="checkbox"/> Yes <input type="checkbox"/> NSP | <input type="checkbox"/> | CHORS01YR   |
| Contact with Cows, zébus today :                | <input type="checkbox"/> No <input type="checkbox"/> Yes <input type="checkbox"/> NSP | <input type="checkbox"/> | CCOWTODAY   |
| Contact with Cows, zébus 0-1yr :                | <input type="checkbox"/> No <input type="checkbox"/> Yes <input type="checkbox"/> NSP | <input type="checkbox"/> | CCOW01YR    |
| Contact with Rodents (rats, mice, etc.) today : | <input type="checkbox"/> No <input type="checkbox"/> Yes <input type="checkbox"/> NSP | <input type="checkbox"/> | CRODTODAY   |
| Contact with Rodents (rats, mice, etc.) 0-1yr : | <input type="checkbox"/> No <input type="checkbox"/> Yes <input type="checkbox"/> NSP | <input type="checkbox"/> | CROD01YR    |
| Contact with Other today :                      | <input type="checkbox"/> No <input type="checkbox"/> Yes <input type="checkbox"/> NSP | <input type="checkbox"/> | COTHTODAY   |
| Contact with Other 0-1yr :                      | <input type="checkbox"/> No <input type="checkbox"/> Yes <input type="checkbox"/> NSP | <input type="checkbox"/> | COTH01YR    |
| If Others, define :.....                        |                                                                                       | <input type="checkbox"/> | NAMEOTHC    |

3. Which of these aliments are usually stocked in the rooms where your child lives ?

|                                                  |                                                                                       |                          |           |
|--------------------------------------------------|---------------------------------------------------------------------------------------|--------------------------|-----------|
| Millet kept in room :                            | <input type="checkbox"/> No <input type="checkbox"/> Yes <input type="checkbox"/> NSP | <input type="checkbox"/> | MIL       |
| Sorghum kept in room :                           | <input type="checkbox"/> No <input type="checkbox"/> Yes <input type="checkbox"/> NSP | <input type="checkbox"/> | SORG      |
| Maize kept in room :                             | <input type="checkbox"/> No <input type="checkbox"/> Yes <input type="checkbox"/> NSP | <input type="checkbox"/> | MAIZ      |
| Rice kept in room :                              | <input type="checkbox"/> No <input type="checkbox"/> Yes <input type="checkbox"/> NSP | <input type="checkbox"/> | RICE      |
| Wheat kept in room :                             | <input type="checkbox"/> No <input type="checkbox"/> Yes <input type="checkbox"/> NSP | <input type="checkbox"/> | WHEA      |
| Biscuits, pasta kept in room :                   | <input type="checkbox"/> No <input type="checkbox"/> Yes <input type="checkbox"/> NSP | <input type="checkbox"/> | BISCUI    |
| Manioc (root, flour) kept in room :              | <input type="checkbox"/> No <input type="checkbox"/> Yes <input type="checkbox"/> NSP | <input type="checkbox"/> | MANIOC    |
| Cashew nut, ground nut kept in room :            | <input type="checkbox"/> No <input type="checkbox"/> Yes <input type="checkbox"/> NSP | <input type="checkbox"/> | NUTP      |
| Curdled milk kept in room :                      | <input type="checkbox"/> No <input type="checkbox"/> Yes <input type="checkbox"/> NSP | <input type="checkbox"/> | MILKCURD  |
| Dried leaves (mint, quinquiliba, baobab, etc.) : | <input type="checkbox"/> No <input type="checkbox"/> Yes <input type="checkbox"/> NSP | <input type="checkbox"/> | LEAF      |
| Other aliments kept in room :                    | <input type="checkbox"/> No <input type="checkbox"/> Yes <input type="checkbox"/> NSP | <input type="checkbox"/> | OTHALIM   |
| If Others, define :.....                         |                                                                                       | <input type="checkbox"/> | NAMEOTHAL |

What is the type of roofing of the rooms where your child lives (today and during the first year of life) ?

|                               |                                                                                       |                          |           |
|-------------------------------|---------------------------------------------------------------------------------------|--------------------------|-----------|
| Corrugated metal roof today : | <input type="checkbox"/> No <input type="checkbox"/> Yes <input type="checkbox"/> NSP | <input type="checkbox"/> | RMETTODAY |
| Corrugated metal roof 0-1yr : | <input type="checkbox"/> No <input type="checkbox"/> Yes <input type="checkbox"/> NSP | <input type="checkbox"/> | RMET01YR  |
| Thatched roof today :         | <input type="checkbox"/> No <input type="checkbox"/> Yes <input type="checkbox"/> NSP | <input type="checkbox"/> | RTHATDAY  |
| Thatched roof 0-1yr :         | <input type="checkbox"/> No <input type="checkbox"/> Yes <input type="checkbox"/> NSP | <input type="checkbox"/> | RTHAT01YR |
| Wooden roof today :           | <input type="checkbox"/> No <input type="checkbox"/> Yes <input type="checkbox"/> NSP | <input type="checkbox"/> | RWOOTODAY |
| Wooden roof 0-1yr :           | <input type="checkbox"/> No <input type="checkbox"/> Yes <input type="checkbox"/> NSP | <input type="checkbox"/> | RWOO01YR  |
| Cement roof today :           | <input type="checkbox"/> No <input type="checkbox"/> Yes <input type="checkbox"/> NSP | <input type="checkbox"/> | RCEMTODAY |
| Cement roof 0-1yr :           | <input type="checkbox"/> No <input type="checkbox"/> Yes <input type="checkbox"/> NSP | <input type="checkbox"/> | RCEM01YR  |
| Plaster roof today :          | <input type="checkbox"/> No <input type="checkbox"/> Yes <input type="checkbox"/> NSP | <input type="checkbox"/> | RPLATODAY |
| Plaster roof 0-1yr :          | <input type="checkbox"/> No <input type="checkbox"/> Yes <input type="checkbox"/> NSP | <input type="checkbox"/> | RPLA01YR  |
| Other type of roof today :    | <input type="checkbox"/> No <input type="checkbox"/> Yes <input type="checkbox"/> NSP | <input type="checkbox"/> | ROTHTODAY |

|                                                                                                                      |                                                                                                                              |                          |                 |
|----------------------------------------------------------------------------------------------------------------------|------------------------------------------------------------------------------------------------------------------------------|--------------------------|-----------------|
| Other type of roof 0-1yr :                                                                                           | <input type="checkbox"/> <sub>0</sub> No <input type="checkbox"/> <sub>1</sub> Yes <input type="checkbox"/> <sub>9</sub> NSP | <input type="checkbox"/> | ROTH01YR        |
| If other, define : .....                                                                                             |                                                                                                                              |                          | ..... NAMEOTHR  |
| <b>4. Which of these objects are in the room where your child sleeps (today and during the first year of life) ?</b> |                                                                                                                              |                          |                 |
| Mattress in room today :                                                                                             | <input type="checkbox"/> <sub>0</sub> No <input type="checkbox"/> <sub>1</sub> Yes <input type="checkbox"/> <sub>9</sub> NSP | <input type="checkbox"/> | MATR01YR        |
| Mattress in room 0-1yr :                                                                                             | <input type="checkbox"/> <sub>0</sub> No <input type="checkbox"/> <sub>1</sub> Yes <input type="checkbox"/> <sub>9</sub> NSP | <input type="checkbox"/> | MATRTODAY       |
| Bednet in room today :                                                                                               | <input type="checkbox"/> <sub>0</sub> No <input type="checkbox"/> <sub>1</sub> Yes <input type="checkbox"/> <sub>9</sub> NSP | <input type="checkbox"/> | BEDNTODAY       |
| Bednet in room 0-1yr :                                                                                               | <input type="checkbox"/> <sub>0</sub> No <input type="checkbox"/> <sub>1</sub> Yes <input type="checkbox"/> <sub>9</sub> NSP | <input type="checkbox"/> | BEDN01YR        |
| Wardrobe in room today :                                                                                             | <input type="checkbox"/> <sub>0</sub> No <input type="checkbox"/> <sub>1</sub> Yes <input type="checkbox"/> <sub>9</sub> NSP | <input type="checkbox"/> | WARDTODAY       |
| Wardrobe in room 0-1yr :                                                                                             | <input type="checkbox"/> <sub>0</sub> No <input type="checkbox"/> <sub>1</sub> Yes <input type="checkbox"/> <sub>9</sub> NSP | <input type="checkbox"/> | WARD01YR        |
| Chest, trunk in room today :                                                                                         | <input type="checkbox"/> <sub>0</sub> No <input type="checkbox"/> <sub>1</sub> Yes <input type="checkbox"/> <sub>9</sub> NSP | <input type="checkbox"/> | CHESTODAY       |
| Chest, trunk in room 0-1yr :                                                                                         | <input type="checkbox"/> <sub>0</sub> No <input type="checkbox"/> <sub>1</sub> Yes <input type="checkbox"/> <sub>9</sub> NSP | <input type="checkbox"/> | CHES01YR        |
| Table in room today :                                                                                                | <input type="checkbox"/> <sub>0</sub> No <input type="checkbox"/> <sub>1</sub> Yes <input type="checkbox"/> <sub>9</sub> NSP | <input type="checkbox"/> | TABPTODAY       |
| Table in room 0-1yr :                                                                                                | <input type="checkbox"/> <sub>0</sub> No <input type="checkbox"/> <sub>1</sub> Yes <input type="checkbox"/> <sub>9</sub> NSP | <input type="checkbox"/> | TABP01YR        |
| Chair in room today :                                                                                                | <input type="checkbox"/> <sub>0</sub> No <input type="checkbox"/> <sub>1</sub> Yes <input type="checkbox"/> <sub>9</sub> NSP | <input type="checkbox"/> | CHPTODAY        |
| Chair in room 0-1yr :                                                                                                | <input type="checkbox"/> <sub>0</sub> No <input type="checkbox"/> <sub>1</sub> Yes <input type="checkbox"/> <sub>9</sub> NSP | <input type="checkbox"/> | CHA01YR         |
| Carpet, rug in room today :                                                                                          | <input type="checkbox"/> <sub>0</sub> No <input type="checkbox"/> <sub>1</sub> Yes <input type="checkbox"/> <sub>9</sub> NSP | <input type="checkbox"/> | CARPTODAY       |
| Carpet, rug in room 0-1yr :                                                                                          | <input type="checkbox"/> <sub>0</sub> No <input type="checkbox"/> <sub>1</sub> Yes <input type="checkbox"/> <sub>9</sub> NSP | <input type="checkbox"/> | CARP01YR        |
| Matting in room today :                                                                                              | <input type="checkbox"/> <sub>0</sub> No <input type="checkbox"/> <sub>1</sub> Yes <input type="checkbox"/> <sub>9</sub> NSP | <input type="checkbox"/> | MATPTODAY       |
| Matting in room 0-1yr :                                                                                              | <input type="checkbox"/> <sub>0</sub> No <input type="checkbox"/> <sub>1</sub> Yes <input type="checkbox"/> <sub>9</sub> NSP | <input type="checkbox"/> | MATP01YR        |
| Curtains in room today :                                                                                             | <input type="checkbox"/> <sub>0</sub> No <input type="checkbox"/> <sub>1</sub> Yes <input type="checkbox"/> <sub>9</sub> NSP | <input type="checkbox"/> | CURTTODAY       |
| Curtains in room 0-1yr :                                                                                             | <input type="checkbox"/> <sub>0</sub> No <input type="checkbox"/> <sub>1</sub> Yes <input type="checkbox"/> <sub>9</sub> NSP | <input type="checkbox"/> | CURT01YR        |
| Malagasy fire in room today :                                                                                        | <input type="checkbox"/> <sub>0</sub> No <input type="checkbox"/> <sub>1</sub> Yes <input type="checkbox"/> <sub>9</sub> NSP | <input type="checkbox"/> | FIRTODAY        |
| Malagasy fire in room 0-1yr :                                                                                        | <input type="checkbox"/> <sub>0</sub> No <input type="checkbox"/> <sub>1</sub> Yes <input type="checkbox"/> <sub>9</sub> NSP | <input type="checkbox"/> | FIR01YR         |
| Other objects in room today :                                                                                        | <input type="checkbox"/> <sub>0</sub> No <input type="checkbox"/> <sub>1</sub> Yes <input type="checkbox"/> <sub>9</sub> NSP | <input type="checkbox"/> | OTHOB01YR       |
| Other objects in room 0-1yr :                                                                                        | <input type="checkbox"/> <sub>0</sub> No <input type="checkbox"/> <sub>1</sub> Yes <input type="checkbox"/> <sub>9</sub> NSP | <input type="checkbox"/> | OTHOBTODAY      |
| If other, define : .....                                                                                             |                                                                                                                              |                          | ..... NAMEOTHOB |
| <b>5. On what type of bedding does your child sleep (today and during the first year of life) ?</b>                  |                                                                                                                              |                          |                 |
| Foam mattress today :                                                                                                | <input type="checkbox"/> <sub>0</sub> No <input type="checkbox"/> <sub>1</sub> Yes <input type="checkbox"/> <sub>9</sub> NSP | <input type="checkbox"/> | FMATR01YR       |
| Foam mattress 0-1yr :                                                                                                | <input type="checkbox"/> <sub>0</sub> No <input type="checkbox"/> <sub>1</sub> Yes <input type="checkbox"/> <sub>9</sub> NSP | <input type="checkbox"/> | FMATRTODAY      |
| Plant fibre mattress (straw, etc.) today :                                                                           | <input type="checkbox"/> <sub>0</sub> No <input type="checkbox"/> <sub>1</sub> Yes <input type="checkbox"/> <sub>9</sub> NSP | <input type="checkbox"/> | PLFMATR01YR     |
| Plant fibre mattress (straw, etc.) 0-1yr :                                                                           | <input type="checkbox"/> <sub>0</sub> No <input type="checkbox"/> <sub>1</sub> Yes <input type="checkbox"/> <sub>9</sub> NSP | <input type="checkbox"/> | PLFMATRTODAY    |
| Wool mattress today :                                                                                                | <input type="checkbox"/> <sub>0</sub> No <input type="checkbox"/> <sub>1</sub> Yes <input type="checkbox"/> <sub>9</sub> NSP | <input type="checkbox"/> | WOMATR01YR      |
| Wool mattress 0-1yr :                                                                                                | <input type="checkbox"/> <sub>0</sub> No <input type="checkbox"/> <sub>1</sub> Yes <input type="checkbox"/> <sub>9</sub> NSP | <input type="checkbox"/> | WOMATRTODAY     |
| Feather mattress today :                                                                                             | <input type="checkbox"/> <sub>0</sub> No <input type="checkbox"/> <sub>1</sub> Yes <input type="checkbox"/> <sub>9</sub> NSP | <input type="checkbox"/> | FEATHMTODAY     |
| Feather mattress 0-1yr :                                                                                             | <input type="checkbox"/> <sub>0</sub> No <input type="checkbox"/> <sub>1</sub> Yes <input type="checkbox"/> <sub>9</sub> NSP | <input type="checkbox"/> | FEATHM01YR      |
| Plastic matting today :                                                                                              | <input type="checkbox"/> <sub>0</sub> No <input type="checkbox"/> <sub>1</sub> Yes <input type="checkbox"/> <sub>9</sub> NSP | <input type="checkbox"/> | PLMAT01YR       |
| Plastic matting 0-1yr :                                                                                              | <input type="checkbox"/> <sub>0</sub> No <input type="checkbox"/> <sub>1</sub> Yes <input type="checkbox"/> <sub>9</sub> NSP | <input type="checkbox"/> | PLMATRTODAY     |
| Plant fibre matting (straw, etc.) today :                                                                            | <input type="checkbox"/> <sub>0</sub> No <input type="checkbox"/> <sub>1</sub> Yes <input type="checkbox"/> <sub>9</sub> NSP | <input type="checkbox"/> | PLFMAT01YR      |
| Plant fibre matting (straw, etc.) 0-1yr :                                                                            | <input type="checkbox"/> <sub>0</sub> No <input type="checkbox"/> <sub>1</sub> Yes <input type="checkbox"/> <sub>9</sub> NSP | <input type="checkbox"/> | PLFMATRTODAY    |
| Other type of bedding today :                                                                                        | <input type="checkbox"/> <sub>0</sub> No <input type="checkbox"/> <sub>1</sub> Yes <input type="checkbox"/> <sub>9</sub> NSP | <input type="checkbox"/> | OTHBEDTODAY     |
| Other type of bedding 0-1yr :                                                                                        | <input type="checkbox"/> <sub>0</sub> No <input type="checkbox"/> <sub>1</sub> Yes <input type="checkbox"/> <sub>9</sub> NSP | <input type="checkbox"/> | OTHBED01YR      |
| If other, define : .....                                                                                             |                                                                                                                              |                          | ..... NOMAUTLI  |
| <b>6. Does your child sleep on a pillow ?</b>                                                                        | <input type="checkbox"/> <sub>0</sub> No <input type="checkbox"/> <sub>1</sub> Yes <input type="checkbox"/> <sub>9</sub> NSP | <input type="checkbox"/> | PILLOW          |
| If <b>No</b> , go to question 8                                                                                      |                                                                                                                              |                          |                 |

|                                                                                                                                                          |                                                                                                                                                                                                       |                                                                                                                              |                          |
|----------------------------------------------------------------------------------------------------------------------------------------------------------|-------------------------------------------------------------------------------------------------------------------------------------------------------------------------------------------------------|------------------------------------------------------------------------------------------------------------------------------|--------------------------|
| If <b>Yes</b> , what type of pillow is it ?                                                                                                              |                                                                                                                                                                                                       |                                                                                                                              |                          |
| Foam :                                                                                                                                                   | <input type="checkbox"/> <sub>0</sub> No <input type="checkbox"/> <sub>1</sub> Yes <input type="checkbox"/> <sub>9</sub> NSP                                                                          | <input type="checkbox"/>                                                                                                     | PILLF                    |
| Synthetic fibres:                                                                                                                                        | <input type="checkbox"/> <sub>0</sub> No <input type="checkbox"/> <sub>1</sub> Yes <input type="checkbox"/> <sub>9</sub> NSP                                                                          | <input type="checkbox"/>                                                                                                     | PILLSYN                  |
| Plant fibres (straw, etc.) :                                                                                                                             | <input type="checkbox"/> <sub>0</sub> No <input type="checkbox"/> <sub>1</sub> Yes <input type="checkbox"/> <sub>9</sub> NSP                                                                          | <input type="checkbox"/>                                                                                                     | PILLPLF                  |
| Feather :                                                                                                                                                | <input type="checkbox"/> <sub>0</sub> No <input type="checkbox"/> <sub>1</sub> Yes <input type="checkbox"/> <sub>9</sub> NSP                                                                          | <input type="checkbox"/>                                                                                                     | PILLFEATH                |
| Other type of pillow :                                                                                                                                   | <input type="checkbox"/> <sub>0</sub> No <input type="checkbox"/> <sub>1</sub> Yes <input type="checkbox"/> <sub>9</sub> NSP                                                                          | <input type="checkbox"/>                                                                                                     | OTHPILL                  |
|                                                                                                                                                          | If other, define :.....                                                                                                                                                                               | .....                                                                                                                        | NAMEOTHPILL              |
| <b>7. Do people smoke in the room where your child lives ?</b>                                                                                           |                                                                                                                                                                                                       |                                                                                                                              |                          |
| Today :                                                                                                                                                  | <input type="checkbox"/> <sub>0</sub> No <input type="checkbox"/> <sub>1</sub> Yes <input type="checkbox"/> <sub>9</sub> NSP                                                                          | <input type="checkbox"/>                                                                                                     | SMOKTODAY                |
| From 0-1yr :                                                                                                                                             | <input type="checkbox"/> <sub>0</sub> No <input type="checkbox"/> <sub>1</sub> Yes <input type="checkbox"/> <sub>9</sub> NSP                                                                          | <input type="checkbox"/>                                                                                                     | SMOK01YR                 |
| During the pregnancy of the mother :                                                                                                                     | <input type="checkbox"/> <sub>0</sub> No <input type="checkbox"/> <sub>1</sub> Yes <input type="checkbox"/> <sub>9</sub> NSP                                                                          | <input type="checkbox"/>                                                                                                     | SMOKPREG                 |
| <b>8. What type of heating and lighting are used in the rooms where your child lives ?</b>                                                               |                                                                                                                                                                                                       |                                                                                                                              |                          |
| Heating and lighting by charcoal :                                                                                                                       | <input type="checkbox"/> <sub>0</sub> No <input type="checkbox"/> <sub>1</sub> Yes <input type="checkbox"/> <sub>9</sub> NSP                                                                          | <input type="checkbox"/>                                                                                                     | CHELCHAR                 |
| Heating and lighting by wood :                                                                                                                           | <input type="checkbox"/> <sub>0</sub> No <input type="checkbox"/> <sub>1</sub> Yes <input type="checkbox"/> <sub>9</sub> NSP                                                                          | <input type="checkbox"/>                                                                                                     | CHELWOO                  |
| Lighting by candle :                                                                                                                                     | <input type="checkbox"/> <sub>0</sub> No <input type="checkbox"/> <sub>1</sub> Yes <input type="checkbox"/> <sub>9</sub> NSP                                                                          | <input type="checkbox"/>                                                                                                     | LCAND                    |
| Lighting by petrol lamp :                                                                                                                                | <input type="checkbox"/> <sub>0</sub> No <input type="checkbox"/> <sub>1</sub> Yes <input type="checkbox"/> <sub>9</sub> NSP                                                                          | <input type="checkbox"/>                                                                                                     | LLAMP                    |
| Lighting by flash light :                                                                                                                                | <input type="checkbox"/> <sub>0</sub> No <input type="checkbox"/> <sub>1</sub> Yes <input type="checkbox"/> <sub>9</sub> NSP                                                                          | <input type="checkbox"/>                                                                                                     | LTORCH                   |
| Lighting by solar :                                                                                                                                      | <input type="checkbox"/> <sub>0</sub> No <input type="checkbox"/> <sub>1</sub> Yes <input type="checkbox"/> <sub>9</sub> NSP                                                                          | <input type="checkbox"/>                                                                                                     | LSOLAR                   |
| Other types of heating and lighting:                                                                                                                     | <input type="checkbox"/> <sub>0</sub> No <input type="checkbox"/> <sub>1</sub> Yes <input type="checkbox"/> <sub>9</sub> NSP                                                                          | <input type="checkbox"/>                                                                                                     | OTHEL                    |
|                                                                                                                                                          | If other, define :.....                                                                                                                                                                               | .....                                                                                                                        | NAMEOTHEL                |
| <b>9. Which of the following products are used or stocked in the rooms where you child lives ?</b>                                                       |                                                                                                                                                                                                       |                                                                                                                              |                          |
| Insecticide (type Yotox, spirales, etc.) :                                                                                                               | <input type="checkbox"/> <sub>0</sub> No <input type="checkbox"/> <sub>1</sub> Yes <input type="checkbox"/> <sub>9</sub> NSP                                                                          | <input type="checkbox"/>                                                                                                     | INSECTIC                 |
| Deodorants (aerosols) :                                                                                                                                  | <input type="checkbox"/> <sub>0</sub> No <input type="checkbox"/> <sub>1</sub> Yes <input type="checkbox"/> <sub>9</sub> NSP                                                                          | <input type="checkbox"/>                                                                                                     | DEODORA                  |
| Incense :                                                                                                                                                | <input type="checkbox"/> <sub>0</sub> No <input type="checkbox"/> <sub>1</sub> Yes <input type="checkbox"/> <sub>9</sub> NSP                                                                          | <input type="checkbox"/>                                                                                                     | INCENSE                  |
| Detergents (type Cotel, etc.) :                                                                                                                          | <input type="checkbox"/> <sub>0</sub> No <input type="checkbox"/> <sub>1</sub> Yes <input type="checkbox"/> <sub>9</sub> NSP                                                                          | <input type="checkbox"/>                                                                                                     | DETERGEN                 |
| Petrol, diesel :                                                                                                                                         | <input type="checkbox"/> <sub>0</sub> No <input type="checkbox"/> <sub>1</sub> Yes <input type="checkbox"/> <sub>9</sub> NSP                                                                          | <input type="checkbox"/>                                                                                                     | PETROL                   |
| Other types of products :                                                                                                                                | <input type="checkbox"/> <sub>0</sub> No <input type="checkbox"/> <sub>1</sub> Yes <input type="checkbox"/> <sub>9</sub> NSP                                                                          | <input type="checkbox"/>                                                                                                     | OTHPROD                  |
|                                                                                                                                                          | If other, define :.....                                                                                                                                                                               | .....                                                                                                                        | NAMEOTHPR                |
| <b><u>Diet :</u></b>                                                                                                                                     |                                                                                                                                                                                                       |                                                                                                                              |                          |
| <b>1. Has your child had <b>diarrhoea without fever</b> or abdominal pains (colic)</b>                                                                   |                                                                                                                                                                                                       |                                                                                                                              |                          |
|                                                                                                                                                          | <b>following introduction of non-maternal milk</b> in his diet (cow or goat's milk, milk powder) :                                                                                                    | <input type="checkbox"/> <sub>0</sub> No <input type="checkbox"/> <sub>1</sub> Yes <input type="checkbox"/> <sub>9</sub> NSP | <input type="checkbox"/> |
|                                                                                                                                                          | <b>after a few months</b> of consuming <b>non-maternal</b> (cow or goat's milk, milk powder) :                                                                                                        | <input type="checkbox"/> <sub>0</sub> No <input type="checkbox"/> <sub>1</sub> Yes <input type="checkbox"/> <sub>9</sub> NSP | <input type="checkbox"/> |
|                                                                                                                                                          |                                                                                                                                                                                                       |                                                                                                                              | DIARINT                  |
|                                                                                                                                                          |                                                                                                                                                                                                       |                                                                                                                              | DIARMONTH                |
| <b>2. Currently, how many times, on average, does your child eat the following aliments ?</b><br><i>The consumption of certain aliments is seasonal.</i> |                                                                                                                                                                                                       |                                                                                                                              |                          |
| Meat :                                                                                                                                                   | <input type="checkbox"/> <sub>1</sub> Never <input type="checkbox"/> <sub>2</sub> <1times/week <input type="checkbox"/> <sub>3</sub> 1-2 times/week <input type="checkbox"/> <sub>4</sub> ≥1times/day | <input type="checkbox"/>                                                                                                     | CONSMEAT                 |
| Fish :                                                                                                                                                   | <input type="checkbox"/> <sub>1</sub> Never <input type="checkbox"/> <sub>2</sub> <1times/week <input type="checkbox"/> <sub>3</sub> 1-2 times/week <input type="checkbox"/> <sub>4</sub> ≥1times/day | <input type="checkbox"/>                                                                                                     | CONSFISH                 |
| Egg :                                                                                                                                                    | <input type="checkbox"/> <sub>1</sub> Never <input type="checkbox"/> <sub>2</sub> <1times/week <input type="checkbox"/> <sub>3</sub> 1-2 times/week <input type="checkbox"/> <sub>4</sub> ≥1times/day | <input type="checkbox"/>                                                                                                     | CONSEGG                  |
| Milk (liquid, powder, curdled) :                                                                                                                         | <input type="checkbox"/> <sub>1</sub> Never <input type="checkbox"/> <sub>2</sub> <1times/week <input type="checkbox"/> <sub>3</sub> 1-2 times/week <input type="checkbox"/> <sub>4</sub> ≥1times/day | <input type="checkbox"/>                                                                                                     | CONSMILK                 |
| Banana :                                                                                                                                                 | <input type="checkbox"/> <sub>1</sub> Never <input type="checkbox"/> <sub>2</sub> <1times/week <input type="checkbox"/> <sub>3</sub> 1-2 times/week <input type="checkbox"/> <sub>4</sub> ≥1times/day | <input type="checkbox"/>                                                                                                     | CONSBANA                 |
| Mango :                                                                                                                                                  | <input type="checkbox"/> <sub>1</sub> Never <input type="checkbox"/> <sub>2</sub> <1times/week <input type="checkbox"/> <sub>3</sub> 1-2 times/week <input type="checkbox"/> <sub>4</sub> ≥1times/day | <input type="checkbox"/>                                                                                                     | CONSMANG                 |
| Melon :                                                                                                                                                  | <input type="checkbox"/> <sub>1</sub> Never <input type="checkbox"/> <sub>2</sub> <1times/week <input type="checkbox"/> <sub>3</sub> 1-2 times/week <input type="checkbox"/> <sub>4</sub> ≥1times/day | <input type="checkbox"/>                                                                                                     | CONSMELON                |

|                             |                                             |                                                    |                                                      |                                                   |                          |           |
|-----------------------------|---------------------------------------------|----------------------------------------------------|------------------------------------------------------|---------------------------------------------------|--------------------------|-----------|
| Orange, lime :              | <input type="checkbox"/> <sub>1</sub> Never | <input type="checkbox"/> <sub>2</sub> <1times/week | <input type="checkbox"/> <sub>3</sub> 1-2 times/week | <input type="checkbox"/> <sub>4</sub> ≥1times/day | <input type="checkbox"/> | CONSORAN  |
| Potatoes, sweet potatoes :  | <input type="checkbox"/> <sub>1</sub> Never | <input type="checkbox"/> <sub>2</sub> <1times/week | <input type="checkbox"/> <sub>3</sub> 1-2 times/week | <input type="checkbox"/> <sub>4</sub> ≥1times/day | <input type="checkbox"/> | CONSPOT   |
| Vegetables :                | <input type="checkbox"/> <sub>1</sub> Never | <input type="checkbox"/> <sub>2</sub> <1times/week | <input type="checkbox"/> <sub>3</sub> 1-2 times/week | <input type="checkbox"/> <sub>4</sub> ≥1times/day | <input type="checkbox"/> | CONSVEG   |
| Millet :                    | <input type="checkbox"/> <sub>1</sub> Never | <input type="checkbox"/> <sub>2</sub> <1times/week | <input type="checkbox"/> <sub>3</sub> 1-2 times/week | <input type="checkbox"/> <sub>4</sub> ≥1times/day | <input type="checkbox"/> | CONSMIL   |
| Sorghum :                   | <input type="checkbox"/> <sub>1</sub> Never | <input type="checkbox"/> <sub>2</sub> <1times/week | <input type="checkbox"/> <sub>3</sub> 1-2 times/week | <input type="checkbox"/> <sub>4</sub> ≥1times/day | <input type="checkbox"/> | CONSSORG  |
| Maize :                     | <input type="checkbox"/> <sub>1</sub> Never | <input type="checkbox"/> <sub>2</sub> <1times/week | <input type="checkbox"/> <sub>3</sub> 1-2 times/week | <input type="checkbox"/> <sub>4</sub> ≥1times/day | <input type="checkbox"/> | CONSMAIS  |
| Rice :                      | <input type="checkbox"/> <sub>1</sub> Never | <input type="checkbox"/> <sub>2</sub> <1times/week | <input type="checkbox"/> <sub>3</sub> 1-2 times/week | <input type="checkbox"/> <sub>4</sub> ≥1times/day | <input type="checkbox"/> | CONSRICE  |
| Wheat (bread, pasta) :      | <input type="checkbox"/> <sub>1</sub> Never | <input type="checkbox"/> <sub>2</sub> <1times/week | <input type="checkbox"/> <sub>3</sub> 1-2 times/week | <input type="checkbox"/> <sub>4</sub> ≥1times/day | <input type="checkbox"/> | CONSWHEA  |
| Nuts (Cashew, ground nut) : | <input type="checkbox"/> <sub>1</sub> Never | <input type="checkbox"/> <sub>2</sub> <1times/week | <input type="checkbox"/> <sub>3</sub> 1-2 times/week | <input type="checkbox"/> <sub>4</sub> ≥1times/day | <input type="checkbox"/> | CONSNUT   |
| Prawns, dried oysters :     | <input type="checkbox"/> <sub>1</sub> Never | <input type="checkbox"/> <sub>2</sub> <1times/week | <input type="checkbox"/> <sub>3</sub> 1-2 times/week | <input type="checkbox"/> <sub>4</sub> ≥1times/day | <input type="checkbox"/> | CONSPRAWN |
| Flavouring cubes Maggi :    | <input type="checkbox"/> <sub>1</sub> Never | <input type="checkbox"/> <sub>2</sub> <1times/week | <input type="checkbox"/> <sub>3</sub> 1-2 times/week | <input type="checkbox"/> <sub>4</sub> ≥1times/day | <input type="checkbox"/> | CONSCUBE  |
| Other :                     | <input type="checkbox"/> <sub>1</sub> Never | <input type="checkbox"/> <sub>2</sub> <1times/week | <input type="checkbox"/> <sub>3</sub> 1-2 times/week | <input type="checkbox"/> <sub>4</sub> ≥1times/day | <input type="checkbox"/> | OTHALCON  |
|                             | If other, define : .....                    |                                                    |                                                      |                                                   | .....                    | NAMEOTHAL |

## HISTORICAL SYMPTOMATOLOGY OF ALLERGIC REACTIONS

### Asthma :

1. Has a doctor or nurse **already** said that you child has asthma ?  
<sub>0</sub> No <sub>1</sub> Yes <sub>9</sub> NSP  ASTHMA
2. Has your child already breathed noisily or had whistling in his chest whilst breathing  
<sub>0</sub> No <sub>1</sub> Yes <sub>9</sub> NSP  
If **No**, go directly to question 6  WHISTLING
3. During his first two years of life, has your child already breathed noisily or had whistling in his chest whilst breathing ?  
<sub>0</sub> No <sub>1</sub> Yes <sub>9</sub> NSP  WHISTL2YR  
If **No**, go directly to question 6  
If **Yes**, how many times (before 2 years of age) ?  
<sub>1</sub>1time <sub>2</sub>2times <sub>3</sub> ≥3times <sub>9</sub> NSP  NBWHIS2YR
- Between the last two **ramadans**, has your child already breathed noisily or had whistling in his chest whilst breathing ?  
<sub>0</sub> No <sub>1</sub> Yes <sub>9</sub> NSP  WHISTL2RA  
If **No**, go directly to question 5  
If **Yes**, at which moment of the year ?  
Rainy season : <sub>0</sub> No <sub>1</sub> Yes <sub>9</sub> NSP  WHISTLRS  
Dry season : <sub>0</sub> No <sub>1</sub> Yes <sub>9</sub> NSP  WHISTLDS  
Harvest time : <sub>0</sub> No <sub>1</sub> Yes <sub>9</sub> NSP  WHISTLHT
- Has the noisy breathing of your child been such that it has prevented him from talking normally?  
<sub>0</sub> No <sub>1</sub> Yes <sub>9</sub> NSP  PREVTALK
- Has your child already had a rasping cough at night that prevents him from sleeping normally ?  
<sub>0</sub> No <sub>1</sub> Yes <sub>9</sub> NSP  TOUSECHE

### Rhinitis and allergic conjunctivitis:

1. Has your child **already had** problems of a runny nose, **or** a sensation of a blocked nose, **or** an itchy nose, **or** sneezing, or loss of the sense of smell **for more than a week**,

|                                                                                                                                                                                                                                                                                                                                                                                                         |                          |            |
|---------------------------------------------------------------------------------------------------------------------------------------------------------------------------------------------------------------------------------------------------------------------------------------------------------------------------------------------------------------------------------------------------------|--------------------------|------------|
| irrespective of the frequency of these episodes? <input type="checkbox"/> <sub>0</sub> No <input type="checkbox"/> <sub>1</sub> Yes <input type="checkbox"/> <sub>9</sub> NSP                                                                                                                                                                                                                           | <input type="checkbox"/> | RHIN1WEEK  |
| 2. Has your child <b>already had</b> problems of a runny nose, <b>or</b> a sensation of a blocked nose, <b>or</b> an itchy nose, <b>or</b> sneezing, or loss of the sense of smell <b>more than 5 times in one year</b> , irrespective of the frequency of these episodes? <input type="checkbox"/> <sub>0</sub> No <input type="checkbox"/> <sub>1</sub> Yes <input type="checkbox"/> <sub>9</sub> NSP | <input type="checkbox"/> | RHIN5FAN   |
| Between the <b>last two ramadans</b> , has your child <b>already had</b> problems of a runny nose, <b>or</b> a sensation of a blocked nose, <b>or</b> an itchy nose, <b>or</b> sneezing, or loss of the sense of smell ? <input type="checkbox"/> <sub>0</sub> No <input type="checkbox"/> <sub>1</sub> Yes <input type="checkbox"/> <sub>9</sub> NSP                                                   | <input type="checkbox"/> | RHIN2RAM   |
| If <b>No</b> , go to question 4                                                                                                                                                                                                                                                                                                                                                                         |                          |            |
| If <b>Yes</b> , at what moment of the year ?                                                                                                                                                                                                                                                                                                                                                            |                          |            |
| Rainy season : <input type="checkbox"/> <sub>0</sub> No <input type="checkbox"/> <sub>1</sub> Yes <input type="checkbox"/> <sub>9</sub> NSP                                                                                                                                                                                                                                                             | <input type="checkbox"/> | RHINRS     |
| Dry season : <input type="checkbox"/> <sub>0</sub> No <input type="checkbox"/> <sub>1</sub> Yes <input type="checkbox"/> <sub>9</sub> NSP                                                                                                                                                                                                                                                               | <input type="checkbox"/> | RHINDS     |
| Harvest time : <input type="checkbox"/> <sub>0</sub> No <input type="checkbox"/> <sub>1</sub> Yes <input type="checkbox"/> <sub>9</sub> NSP                                                                                                                                                                                                                                                             | <input type="checkbox"/> | RHINHT     |
| 3. Has your child <b>already had</b> watery eyes, <b>or</b> itchy eyes, <b>or</b> an allergic limbo-conjunctivitis? <input type="checkbox"/> <sub>0</sub> No <input type="checkbox"/> <sub>1</sub> Yes <input type="checkbox"/> <sub>9</sub> NSP                                                                                                                                                        | <input type="checkbox"/> | CONJALER   |
| If <b>No</b> , go directly to question 1 in the section <b>Eczema</b>                                                                                                                                                                                                                                                                                                                                   |                          |            |
| Has your child had, between the <b>last two ramadans</b> , watery eyes, <b>or</b> itchy eyes, <b>or</b> an allergic limbo-conjunctivitis? <input type="checkbox"/> <sub>0</sub> No <input type="checkbox"/> <sub>1</sub> Yes <input type="checkbox"/> <sub>9</sub> NSP                                                                                                                                  | <input type="checkbox"/> | CONJ2RAM   |
| If <b>No</b> , go directly to question 5                                                                                                                                                                                                                                                                                                                                                                |                          |            |
| If <b>Yes</b> , at what moment of the year ?                                                                                                                                                                                                                                                                                                                                                            |                          |            |
| Rainy season : <input type="checkbox"/> <sub>0</sub> No <input type="checkbox"/> <sub>1</sub> Yes <input type="checkbox"/> <sub>9</sub> NSP                                                                                                                                                                                                                                                             | <input type="checkbox"/> | CONJRS     |
| Dry season : <input type="checkbox"/> <sub>0</sub> No <input type="checkbox"/> <sub>1</sub> Yes <input type="checkbox"/> <sub>9</sub> NSP                                                                                                                                                                                                                                                               | <input type="checkbox"/> | CONJDS     |
| Harvest time : <input type="checkbox"/> <sub>0</sub> No <input type="checkbox"/> <sub>1</sub> Yes <input type="checkbox"/> <sub>9</sub> NSP                                                                                                                                                                                                                                                             | <input type="checkbox"/> | CONJHT     |
| <b><u>Eczéma :</u></b>                                                                                                                                                                                                                                                                                                                                                                                  |                          |            |
| Has your child <b>already had</b> skin problems with dry patches or seeping cracked patches and itching ? <input type="checkbox"/> <sub>0</sub> No <input type="checkbox"/> <sub>1</sub> Yes <input type="checkbox"/> <sub>9</sub> NSP                                                                                                                                                                  | <input type="checkbox"/> | ECZEMA     |
| If <b>No</b> , the questionnaire has finished.                                                                                                                                                                                                                                                                                                                                                          |                          |            |
| Between the <b>last two ramadans</b> , has your child had skin problems with dry patches or seeping cracked patches and itching ?? <input type="checkbox"/> <sub>0</sub> No <input type="checkbox"/> <sub>1</sub> Yes <input type="checkbox"/> <sub>9</sub> NSP                                                                                                                                         | <input type="checkbox"/> | ECZE2RAM   |
| If <b>No</b> , go directly to question 3                                                                                                                                                                                                                                                                                                                                                                |                          |            |
| If <b>Yes</b> , at what moment of the year ?                                                                                                                                                                                                                                                                                                                                                            |                          |            |
| Rainy season : <input type="checkbox"/> <sub>0</sub> No <input type="checkbox"/> <sub>1</sub> Yes <input type="checkbox"/> <sub>9</sub> NSP                                                                                                                                                                                                                                                             | <input type="checkbox"/> | ECZEMARS   |
| Dry season : <input type="checkbox"/> <sub>0</sub> No <input type="checkbox"/> <sub>1</sub> Yes <input type="checkbox"/> <sub>9</sub> NSP                                                                                                                                                                                                                                                               | <input type="checkbox"/> | ECZEMADS   |
| Harvest time : <input type="checkbox"/> <sub>0</sub> No <input type="checkbox"/> <sub>1</sub> Yes <input type="checkbox"/> <sub>9</sub> NSP                                                                                                                                                                                                                                                             | <input type="checkbox"/> | ECZEMAHT   |
| 1. Have these skin problems affected different parts of the body of your child ?                                                                                                                                                                                                                                                                                                                        |                          |            |
| Scalp : <input type="checkbox"/> <sub>0</sub> No <input type="checkbox"/> <sub>1</sub> Yes <input type="checkbox"/> <sub>9</sub> NSP                                                                                                                                                                                                                                                                    | <input type="checkbox"/> | ECZESCALP  |
| Face : <input type="checkbox"/> <sub>0</sub> No <input type="checkbox"/> <sub>1</sub> Yes <input type="checkbox"/> <sub>9</sub> NSP                                                                                                                                                                                                                                                                     | <input type="checkbox"/> | ECZEFAC    |
| Around the eyes and ears : <input type="checkbox"/> <sub>0</sub> No <input type="checkbox"/> <sub>1</sub> Yes <input type="checkbox"/> <sub>9</sub> NSP                                                                                                                                                                                                                                                 | <input type="checkbox"/> |            |
| Armpits : <input type="checkbox"/> <sub>0</sub> No <input type="checkbox"/> <sub>1</sub> Yes <input type="checkbox"/> <sub>9</sub> NSP                                                                                                                                                                                                                                                                  | <input type="checkbox"/> | ECZEEYEEAR |

|                                                                                                                                                                                                                                                                                                                                                    |                                                                                       |                          |            |
|----------------------------------------------------------------------------------------------------------------------------------------------------------------------------------------------------------------------------------------------------------------------------------------------------------------------------------------------------|---------------------------------------------------------------------------------------|--------------------------|------------|
| Elbow :                                                                                                                                                                                                                                                                                                                                            | <input type="checkbox"/> No <input type="checkbox"/> Yes <input type="checkbox"/> NSP | <input type="checkbox"/> | ECZEARMFIT |
| Hands :                                                                                                                                                                                                                                                                                                                                            | <input type="checkbox"/> No <input type="checkbox"/> Yes <input type="checkbox"/> NSP | <input type="checkbox"/> | ECZEELBOW  |
| Under the buttocks:                                                                                                                                                                                                                                                                                                                                | <input type="checkbox"/> No <input type="checkbox"/> Yes <input type="checkbox"/> NSP | <input type="checkbox"/> | ECZEHAND   |
| Groin :                                                                                                                                                                                                                                                                                                                                            | <input type="checkbox"/> No <input type="checkbox"/> Yes <input type="checkbox"/> NSP | <input type="checkbox"/> | ECZEBUTT   |
| Behind the knee :                                                                                                                                                                                                                                                                                                                                  | <input type="checkbox"/> No <input type="checkbox"/> Yes <input type="checkbox"/> NSP | <input type="checkbox"/> | ECZEGROIN  |
| Feet :                                                                                                                                                                                                                                                                                                                                             | <input type="checkbox"/> No <input type="checkbox"/> Yes <input type="checkbox"/> NSP | <input type="checkbox"/> | ECZEKNEE   |
| Other part of body :                                                                                                                                                                                                                                                                                                                               | <input type="checkbox"/> No <input type="checkbox"/> Yes <input type="checkbox"/> NSP | <input type="checkbox"/> | ECZEFEET   |
|                                                                                                                                                                                                                                                                                                                                                    |                                                                                       | <input type="checkbox"/> | ECZEOTH    |
| <p>What age did your child have when these skin problems of dry patches, weeping cracked patches or itching appear for the <b>first time</b>?</p> <p><input type="checkbox"/> <sub>1</sub> &lt; 2yr <input type="checkbox"/> <sub>2</sub> 2 - 4 yr <input type="checkbox"/> <sub>3</sub> ≥ 5yr</p>                                                 |                                                                                       | <input type="checkbox"/> | AGECZEMA   |
| <p>Have your child's skin problems ever been sufficiently important to prevent him from sleeping correctly or waking him up during the night ?</p> <p><input type="checkbox"/> No <input type="checkbox"/> Yes <input type="checkbox"/> NSP</p>                                                                                                    |                                                                                       | <input type="checkbox"/> | IRRECZEM   |
| <p><b><u>Comments :</u></b> Note with reference to which questions these comments apply</p> <p>.....</p> |                                                                                       |                          |            |
